# Supplementary material for: Affinity- and activity-based probes synthesized from structurally diverse hops-derived xanthohumol flavonoids reveal highly varied protein profiling in Escherichia coli
Source: Royal Society of Chemistry journal article supplement (doi:10.1039/d3ra05296f), 2023-01-01
Supplement: d3ra05296f1.xlsx [file d3ra05296f1.xlsx]

## Sheet: iBAQ-ABP all Data
Protein IDs	Majority protein IDs	gi	gb	Fasta headers	Organism	Peptides	Razor + unique peptides	Unique peptides	iBAQ peptides	iBAQ Max	Count (all)	Count (ABPs Only)	NP-UVCTR-AVE	NP-NoUVCTR-AVE	XN-ABP-1 AVG	XN-ABP-1 FC	IXN-ABP-1 AVG	IXN-ABP-1 FC	XN-ABP-3 AVG	XN-ABP-3 FC	IXN-ABP-3 AVG	IXN-ABP-3 FC	XN-ABP-2 AVG	XN-ABP-2 FC	IXN-ABP-2 AVG	IXN-ABP-2 FC	XN-ABP-4 AVG	XN-ABP-4 FC	IXN-ABP-4 AVG	IXN-ABP-4 FC	NP-UVCTR-1	NP-UVCTR-2	NP-UVCTR-3	NP-UVCTR-4	NP-NoUVCTR-5	NP-NoUVCTR-6	NP-NoUVCTR-7	NP-NoUVCTR-8	XN-ABP-1_rep1	XN-ABP-1_rep2	XN-ABP-1_rep3	XN-ABP-1_rep4	XN-ABP-1-20XINH-rep1	XN-ABP-1-20XINH-rep2	XN-ABP-1-20XINH-rep3	XN-ABP-1-20XINH-rep4	IXN-ABP-1-rep1	IXN-ABP-1-rep2	IXN-ABP-1-rep3
gi|1790042257|gb|QHB87970.1|	gi|1790042257|gb|QHB87970.1|	1790042257	QHB87970.1	C4-dicarboxylate transporter DctA	Escherichia coli BL21-AI	8	8	8	10	28.0123	31	19	16.6063	18.1901	24.3381	212.567	23.9144	158.472	18.2049	3.02831	23.3468	106.924					15.9632	0.640326	17.8092	2.30189	16.7529	16.6669	16.3992			18.1901			23.2137	25.4766	23.9247	24.7375	22.5856	23.4433	22.7092	22.2962	23.46	24.5724	23.5592
gi|1790041403|gb|QHB87116.1|	gi|1790041403|gb|QHB87116.1|	1790041403	QHB87116.1	ATP-dependent chaperone ClpB	Escherichia coli BL21-AI	63	63	63	50	29.3725	47	31	17.1867	16.9693	24.604	170.939	24.562	166.035	18.8916	3.26006	23.1096	60.6721	16.1033	0.471914	16.6222	0.676207	19.5786	5.24851	18.1498	1.94957	15.6327	15.1586	17.3475	20.6078	19.5327	16.8668	14.2221	17.2555	23.9969	24.0536	24.9018	25.4637	25.2392	25.9739	26.2223	25.1559	24.2736	25.1565	23.9815
gi|1790040588|gb|QHB86301.1|	gi|1790040588|gb|QHB86301.1|	1790040588	QHB86301.1	DUF945 family protein	Escherichia coli BL21-AI	23	23	23	29	26.7748	29	18	15.5303	15.3928	22.6389	138.004	22.5556	130.264	15.2248	0.809139	22.6838	142.375					17.3451	3.51805	15.4189	0.925718	14.8843			16.1763		15.3928			21.8782	22.5905	22.9492	23.1376	21.6859	21.976	21.5696	21.1741	22.4945	23.1818	21.9189
gi|1790042445|gb|QHB88158.1|	gi|1790042445|gb|QHB88158.1|	1790042445	QHB88158.1	membrane protein insertase YidC	Escherichia coli BL21-AI	5	5	5	19	25.1392	22	13	14.6045		21.2269	98.5245	20.1277	45.9871			19.717	34.5963					16.3237	3.29265						14.6045					20.7793	21.4224	20.731	21.9749	21.7078	21.6896	21.268	21.3071	20.2634	21.1882	20.4038
gi|1790042934|gb|QHB88647.1|	gi|1790042934|gb|QHB88647.1|	1790042934	QHB88647.1	class 1 fructose-bisphosphatase	Escherichia coli BL21-AI	11	11	11	14	26.7789	31	19	15.3142	17.6075	21.8654	93.7798	21.6742	82.1411	16.6997	2.61276	19.4604	17.7074					17.0512	3.33361	16.7505	2.70628			15.6085	15.0198	18.0527	17.1623			20.9888	21.4687	22.6159	22.3881	21.7066	23.1211	24.2255	22.6944	20.5764	22.7194	21.482
gi|1790041150|gb|QHB86863.1|	gi|1790041150|gb|QHB86863.1|	1790041150	QHB86863.1	phosphate acetyltransferase	Escherichia coli BL21-AI	28	28	28	34	28.2923	44	29	17.1951	17.8748	23.62	85.9214	23.2668	67.2607	18.4891	2.45219	22.0294	28.5291	14.9117	0.205423	16.1261	0.476645	18.0981	1.87003	16.5245	0.628265	15.4715	17.9818		18.1319	18.6528	17.3529	17.7231	17.7706	22.7557	23.1767	24.234	24.3137	23.9551	24.983	25.429	24.4467	22.8264	23.8614	22.8969
gi|1790042333|gb|QHB88046.1|	gi|1790042333|gb|QHB88046.1|	1790042333	QHB88046.1	PTS mannitol transporter subunit IICBA	Escherichia coli BL21-AI	13	13	13	22	26.6707	31	21	16.1608		22.5025	81.1068	21.5928	43.1735			19.8605	12.9936			16.1674	1.00462	16.8379	1.59892	16.6162	1.37118	16.7469	15.5746							21.6516	23.9358	21.5608	22.8618	22.618	23.8065	23.2873	22.3479	21.8732	22.0958	20.5804
gi|1790041852|gb|QHB87565.1|	gi|1790041852|gb|QHB87565.1|	1790041852	QHB87565.1	DUF883 family protein	Escherichia coli BL21-AI	5	5	5	4	27.9702	23	14	18.4345		24.6003	71.7963	22.6416	18.4706	19.13	1.61949	22.0233	12.0319												18.4345					24.1112	24.5917	24.515	25.1835	23.403	24.3302	24.1734	23.8472	22.2126	22.8709	22.7464
gi|1790039351|gb|QHB85064.1|	gi|1790039351|gb|QHB85064.1|	1790039351	QHB85064.1	acetyl-CoA carboxylase carboxyl transferase subunit alpha	Escherichia coli BL21-AI	15	15	15	19	27.0598	22	12	15.9693		22.0173	66.1671	22.3378	82.6265			20.8403	29.2624										16.9308		15.0078					21.8586	21.0584	21.8947	23.2575	23.2782	23.6328	23.1163	22.9608	21.6856	22.9196	21.8387
gi|1790041822|gb|QHB87535.1|	gi|1790041822|gb|QHB87535.1|	1790041822	QHB87535.1	RNA polymerase sigma factor RpoD	Escherichia coli BL21-AI	24	24	24	24	28.0077	38	23	16.9436	16.5756	22.6955	53.89	23.3232	83.2679	16.9548	1.00781	21.3613	21.3731	14.4454	0.176997			17.3899	1.36254	15.7571	0.439391	16.1256	16.6577		18.0473	17.3856	16.4881	16.0203	16.4083	22.3789	22.0659	22.7556	23.5816	23.6916	25.0192	25.3187	23.919	22.2517	23.8285	23.3191
gi|1790041139|gb|QHB86852.1|	gi|1790041139|gb|QHB86852.1|	1790041139	QHB86852.1	NADH-quinone oxidoreductase subunit C/D	Escherichia coli BL21-AI	14	14	14	35	25.6472	21	12	15.4758		21.2035	52.9921	20.2438	27.2461			18.2476	6.82961												15.4758					20.2173	20.818	21.8926	21.8861	20.774	22.4062	22.7687	21.4099	19.5596	21.0776	19.923
gi|1790040921|gb|QHB86634.1|	gi|1790040921|gb|QHB86634.1|	1790040921	QHB86634.1	dTDP-glucose 4,6-dehydratase	Escherichia coli BL21-AI	8	8	8	20	23.7005	18	10	13.5354	16.9368	19.2525	52.6034	15.9514	5.33694			15.4942	3.88747					15.5221	3.96343					13.5354		16.9368					18.8392	20.0625	18.8558	20.113	21.7933	22.2782	17.5817	13.2076	18.2598	16.3869
gi|1790042483|gb|QHB88196.1|	gi|1790042483|gb|QHB88196.1|	1790042483	QHB88196.1	aspartate--ammonia ligase	Escherichia coli BL21-AI	10	10	10	16	27.0665	23	14	17.1505		22.8458	51.8181	22.6388	44.8892			21.6295	22.3015							16.2017	0.518089	17.1505								22.6005	21.8767	23.3171	23.5891	23.2535	23.0467	23.0983	22.5574	22.3846	23.0513	22.4673
gi|1790040672|gb|QHB86385.1|	gi|1790040672|gb|QHB86385.1|	1790040672	QHB86385.1	phosphoenolpyruvate synthase	Escherichia coli BL21-AI	31	31	31	36	28.5272	34	18	16.8238	17.1321	22.5086	51.4385	22.9306	68.9173	15.6941	0.456998	20.5725	13.4424					15.988	0.560276			17.1621	17.9132	14.7872	17.4327	17.2323	19.5408	15.1832	16.5721	22.1411	21.3003	23.0625	23.5304	24.0438	25.5351	26.8866	24.0324	21.6778	23.5506	22.7827
gi|1790040781|gb|QHB86494.1|	gi|1790040781|gb|QHB86494.1|	1790040781	QHB86494.1	PTS mannose transporter subunit IID	Escherichia coli BL21-AI	10	10	10	15	27.2512	31	15	17.8527	18.2548	23.5227	50.9125	21.9719	17.3778	18.1489	1.22791	20.3094	5.48933									18.4263	17.0916	16.9021	18.991	18.105	17.7426	17.8471	19.3245	22.6688	24.3946	23.1813	23.8459	23.224	24.0653	23.9144	23.6141	20.9042	22.7162	21.8906
gi|1790039203|gb|QHB84916.1|	gi|1790039203|gb|QHB84916.1|	1790039203	QHB84916.1	30S ribosomal protein S20	Escherichia coli BL21-AI	5	5	5	3	30.2746	37	22	21.3181	20.7447	26.969	50.2465	24.208	7.41229	21.7763	1.37386	22.1823	1.82041	17.1231	0.0545987			20.3168	0.499576	19.0112	0.202106	21.6239	22.2154	20.723	20.7099	20.1262	20.4088	21.6992		24.6047	27.459	27.8473	27.965	24.7555	26.3537	26.4318	25.3458	22.0444	25.2699	24.328
gi|1790042476|gb|QHB88189.1|	gi|1790042476|gb|QHB88189.1|	1790042476	QHB88189.1	F0F1 ATP synthase subunit C	Escherichia coli BL21-AI	2	2	2	3	31.287	24	12	21.8366	21.7815	27.477	49.88	26.1816	20.3227			27.1844	40.7236										21.6089	22.5644	21.3364		21.7815			27.5017	27.4359	27.3235	27.6468	26.473	26.4751	26.1901	26.0143	26.2656	27.2578	23.8665
gi|1790041111|gb|QHB86824.1|	gi|1790041111|gb|QHB86824.1|	1790041111	QHB86824.1	bifunctional UDP-4-amino-4-deoxy-L-arabinose formyltransferase/UDP-glucuronic acid oxidase ArnA	Escherichia coli BL21-AI	24	24	24	38	27.6279	28	17	16.3159	16.6495	21.9521	49.738	21.3322	32.3651			19.2111	7.4397					17.5845	2.4094	15.3003	0.49463			15.3418	17.2899				16.6495	19.9343	21.2924	23.6122	22.9696	20.9131	24.2593	25.9309	23.035	17.5366	23.1788	21.816
gi|1790041966|gb|QHB87679.1|	gi|1790041966|gb|QHB87679.1|	1790041966	QHB87679.1	N-acetylneuraminate lyase	Escherichia coli BL21-AI	14	14	14	14	28.0798	29	15	18.4666	19.177	24.0882	49.2374	22.7919	20.0477	18.6399	1.12769	21.192	6.6138									20.3949	15.7151		19.2897	19.5799		18.4557	19.4955	23.5163	23.4611	24.5132	24.8623	24.0941	23.8804	24.8688	23.4525	22.5491	23.3313	22.7349
gi|1790042503|gb|QHB88216.1|	gi|1790042503|gb|QHB88216.1|	1790042503	QHB88216.1	ketol-acid reductoisomerase	Escherichia coli BL21-AI	22	22	22	32	26.9946	42	31	16.0182	15.9274	21.6375	49.1539	21.4708	43.7916	15.9278	0.939276	18.0355	4.04806	14.7331	0.410333	14.3702	0.31908	16.5618	1.45761	15.2823	0.600422				16.0182		16.491		15.3638	22.0622	19.3969	22.6093	22.4814	23.2052	24.4512	25.0906	22.6657	20.9109	21.6268	21.3986
gi|1790042685|gb|QHB88398.1|	gi|1790042685|gb|QHB88398.1|	1790042685	QHB88398.1	phosphoethanolamine transferase CptA	Escherichia coli BL21-AI	11	11	11	31	26.231	28	19	16.8208		22.4373	49.0607	21.3541	23.1558			20.0175	9.16872	13.8103	0.124097			16.2666	0.681063	16.1479	0.627261	16.8208								21.4492	22.4245	22.7684	23.107	21.8991	22.2674	22.2278	21.9693	20.856	22.1454	20.6607
gi|1790039336|gb|QHB85049.1|	gi|1790039336|gb|QHB85049.1|	1790039336	QHB85049.1	30S ribosomal protein S2	Escherichia coli BL21-AI	20	20	20	14	30.4886	48	32	20.1552	20.353	25.718	47.2671	25.7244	47.4776	20.7121	1.47103	24.7814	24.6959	18.3973	0.295673	17.7998	0.195413	18.8577	0.406829	18.9072	0.42102	21.7099	18.1237	20.3782	20.4091	18.4098	20.4907	21.4218	21.0896	24.7591	25.3725	26.1604	26.58	26.0411	27.002	26.8833	26.104	24.9304	26.0225	25.5847
gi|1790040171|gb|QHB85884.1|	gi|1790040171|gb|QHB85884.1|	1790040171	QHB85884.1	FAD-dependent oxidoreductase	Escherichia coli BL21-AI	11	11	11	27	25.8596	37	23	16.0167	16.0663	21.579	47.2507	20.9076	29.6693	16.7555	1.66879	19.6058	12.0338	14.3946	0.324857	14.282	0.300453	15.2003	0.56784	14.8509	0.4457	16.1208	16.1604	15.84	15.9456	16.1286	16.0039			20.7254	21.7	21.7798	22.1108	21.4609	22.4669	22.4004	22.0732	20.333	21.7287	20.4846
gi|1790039510|gb|QHB85223.1|	gi|1790039510|gb|QHB85223.1|	1790039510	QHB85223.1	protein translocase subunit SecD	Escherichia coli BL21-AI	26	26	26	31	27.4329	44	28	18.025	17.7738	23.5857	47.1981	22.72	25.902	18.6399	1.53147	21.524	11.3057	15.1068	0.132295	16.0921	0.261907	15.6717	0.195705	16.4563	0.337106	17.3879	17.8057	18.0187	18.8876	18.3598	17.8613	17.4583	17.4159	22.8361	23.4324	23.6695	24.4047	22.9753	23.8345	24.176	23.137	22.0349	23.1878	22.5336
gi|1790040253|gb|QHB85966.1|	gi|1790040253|gb|QHB85966.1|	1790040253	QHB85966.1	3-deoxy-8-phosphooctulonate synthase	Escherichia coli BL21-AI	17	17	17	17	29.1072	47	31	18.788	18.4366	24.2743	44.8266	23.71	30.3158	19.3141	1.44001	21.7154	7.60713	17.4947	0.40803	15.886	0.133786	16.3707	0.187206	16.4866	0.202861	18.0262	19.6686	17.8862	19.5711	19.1193	17.9546	18.163	18.5097	24.13	23.6717	24.4855	24.8099	25.0271	26.0905	26.2246	24.9551	23.1094	23.8493	24.0682
gi|1790042816|gb|QHB88529.1|	gi|1790042816|gb|QHB88529.1|	1790042816	QHB88529.1	VOC family metalloprotein YjdN	Escherichia coli BL21-AI	6	6	6	9	27.9641	40	26	18.6847	19.6144	24.1687	44.7547	24.2124	46.1302	20.2882	3.03874	23.7459	33.3868	16.6959	0.251938			17.4585	0.427433	17.6219	0.478694	19.6517	17.26	19.1424		19.4405	20.699	18.6206	19.6977	22.937	23.389	25.0117	25.337	21.8817	21.2794	21.5816		24.4235	24.0985	24.3163
gi|1790042040|gb|QHB87753.1|	gi|1790042040|gb|QHB87753.1|	1790042040	QHB87753.1	50S ribosomal protein L5	Escherichia coli BL21-AI	25	25	25	10	32.8142	48	32	23.0812	23.552	28.5575	44.5192	28.1894	34.4935	24.2941	2.31802	26.7313	12.5542	20.001	0.118241	18.7908	0.0511042	20.6705	0.188067	20.2631	0.1418	23.314	22.7541	22.8567	23.4	23.1402	24.1578	23.2313	23.679	27.4125	28.3973	29.0798	29.3406	27.5332	29.0579	29.2817	28.0051	26.9832	28.8517	28.1634
gi|1790040965|gb|QHB86678.1|	gi|1790040965|gb|QHB86678.1|	1790040965	QHB86678.1	PTS galactitol transporter subunit IIA	Escherichia coli BL21-AI	7	7	7	8	29.8294	40	26	20.3922	19.7476	25.8552	44.1082	24.7721	20.8195	20.7109	1.2472	23.4529	8.34357	22.352	3.89019	21.3654	1.96324	22.0383	3.12987	22.2338	3.5842		19.7281	20.4339	21.0146	19.5897		19.4125	20.2405	25.1208	25.3998	26.5	26.4	25.8343	25.4144	25.9289	25.4575	24.6519	24.8758	24.4748
gi|1790042290|gb|QHB88003.1|	gi|1790042290|gb|QHB88003.1|	1790042290	QHB88003.1	glycine--tRNA ligase subunit beta	Escherichia coli BL21-AI	34	34	34	41	27.9648	38	22	18.016	17.0992	23.4438	43.0436	22.8709	28.9371	18.0071	0.99384	20.5111	5.63745	14.2425	0.0731228			16.8616	0.449242	15.4111	0.164374	19.1403	16.2044	17.1391	19.5803	20.1163	15.5628	15.4834	17.2342	22.6908	22.8817	23.7481	24.4545	23.5853	25.0064	25.2999	23.7928	21.6754	23.6916	22.4322
gi|1790041769|gb|QHB87482.1|	gi|1790041769|gb|QHB87482.1|	1790041769	QHB87482.1	alcohol dehydrogenase	Escherichia coli BL21-AI	13	13	13	18	26.4457	37	23	17.9996	17.9317	23.3752	41.517	20.8694	7.3099			19.8701	3.65661	15.3119	0.155216	16.2074	0.288726	14.8775	0.114854	17.1923	0.57146	16.8621	17.9425		19.1942	18.8364	16.9643		17.9944	21.9434	23.1984	23.8285	24.5305	20.9859	22.1044	19.9908	20.5205	20.1294	21.7296	21.2463
gi|1790040272|gb|QHB85985.1|	gi|1790040272|gb|QHB85985.1|	1790040272	QHB85985.1	bifunctional acetaldehyde-CoA/alcohol dehydrogenase	Escherichia coli BL21-AI	39	39	39	45	28.9571	48	32	18.59	18.1551	23.9509	41.0955	23.6554	33.4861	18.8747	1.21819	22.3895	13.9241	16.4472	0.226449	15.6757	0.132659	17.5112	0.473437	17.0489	0.34364	19.8756	17.5835	18.4506	18.45	15.6292	19.7003	18.6944	18.5967	23.035	23.2051	24.6829	24.8805	24.7163	25.6901	26.6484	24.7806	22.9719	24.3063	23.2591
gi|1790041540|gb|QHB87253.1|	gi|1790041540|gb|QHB87253.1|	1790041540	QHB87253.1	CTP synthase (glutamine hydrolyzing)	Escherichia coli BL21-AI	32	32	32	30	28.4572	38	24	17.3522	17.0969	22.6661	39.7781	22.8015	43.6929	15.6646	0.310454	20.3115	7.77774			17.3637	1.00803	19.2131	3.63245	16.4549	0.536909		16.2192	17.4917	18.3456		17.6802	15.6739	17.9367	22.6522	21.5347	23.3244	23.1529	24.4829	25.8384	26.9461	24.3048	21.5314	23.2032	22.9121
gi|1790040776|gb|QHB86489.1|	gi|1790040776|gb|QHB86489.1|	1790040776	QHB86489.1	L-serine dehydratase 1	Escherichia coli BL21-AI	12	12	12	17	27.1367	26	14	17.0116	16.6793	22.2969	38.9963	21.6578	25.0407	16.4792	0.691414	19.3078	4.91168												17.0116	16.7062		15.9653	17.3664	21.9734	21.1087	22.7284	23.377	22.9621	24.0759	24.9724	23.2315	20.3669	22.8171	20.7841
gi|1790040611|gb|QHB86324.1|	gi|1790040611|gb|QHB86324.1|	1790040611	QHB86324.1	tyrosine--tRNA ligase	Escherichia coli BL21-AI	12	12	12	18	26.7724	28	14	16.4563	17.1937	21.7052	38.0272	20.8772	21.421			18.4363	3.94497					17.2146	1.69158				15.4911	16.5725	17.3052	17.589		16.3414	17.6508	21.0911	20.5569	22.5972	22.5756	22.727	23.8647	24.6227	22.8686	19.6931	21.1503	20.6375
gi|1790041926|gb|QHB87639.1|	gi|1790041926|gb|QHB87639.1|	1790041926	QHB87639.1	ATP-dependent zinc metalloprotease FtsH	Escherichia coli BL21-AI	10	10	10	37	25.1297	21	12	15.0183		20.258	37.7833	19.2471	18.7496			18.3075	9.77548										15.0183							18.5813	20.5657	20.6088	21.2761	21.3373	22.3861	21.644	21.0241	19.1172	19.9603	18.2523
gi|1790042510|gb|QHB88223.1|	gi|1790042510|gb|QHB88223.1|	1790042510	QHB88223.1	transcription termination factor Rho	Escherichia coli BL21-AI	30	30	30	25	30.04	45	31	19.3497	19.0736	24.5797	37.5307	24.8392	44.9268	19.3589	1.0064	23.7092	20.5276	16.7613	0.166266	16.8599	0.178023	19.2325	0.921935	18.395	0.515934	19.6546	18.6663	19.546	19.5319		19.4597		18.6875	23.4596	24.3661	25.074	25.4192	24.581	26.8313	27.02	25.6818	23.4297	25.6213	24.7599
gi|1790041329|gb|QHB87042.1|	gi|1790041329|gb|QHB87042.1|	1790041329	QHB87042.1	flavodoxin-dependent (E)-4-hydroxy-3-methylbut-2-enyl-diphosphate synthase	Escherichia coli BL21-AI	22	22	22	24	27.5928	34	21	17.3166	17.3864	22.5402	37.3636	21.7973	22.3262	17.2566	0.959257	19.6299	4.97001	14.6235	0.154622			18.6177	2.46417	17.513	1.14577	17.3166				15.9819	20.0917	17.2012	16.2708	21.7457	22.1183	23.2623	23.0345	22.9373	24.0485	25.6188	22.8807	19.3721	22.745	21.7252
gi|1790042596|gb|QHB88309.1|	gi|1790042596|gb|QHB88309.1|	1790042596	QHB88309.1	DNA polymerase I	Escherichia coli BL21-AI	18	18	18	46	25.0564	28	14	14.5111	16.8951	19.6595	35.4664	20.1126	48.5531	13.8862	0.648477	18.2264	13.1343									14.9589	14.6646		13.9098	15.5432	16.947		18.1951	19.1704	18.7678	19.9297	20.7701	20.6781	21.3131	22.6098	20.7269	19.3999	20.8379	19.6679
gi|1790042224|gb|QHB87937.1|	gi|1790042224|gb|QHB87937.1|	1790042224	QHB87937.1	universal stress protein UspA	Escherichia coli BL21-AI	5	5	5	4	28.986	36	25	19.722	19.3125	24.8498	34.9652	24.037	19.9051	19.3354	0.764954	23.4818	13.546	17.7557	0.255917	20.1208	1.31843	21.5971	3.66822	21.2268	2.83798		19.1373		20.3066		19.3125			24.4242	24.8968	24.6464	25.4318	24.4815	25.1891	25.1162	24.1175	23.7955	24.7667	22.9557
gi|1790040686|gb|QHB86399.1|	gi|1790040686|gb|QHB86399.1|	1790040686	QHB86399.1	threonine--tRNA ligase	Escherichia coli BL21-AI	23	23	23	38	27.2324	38	22	17.0977	18.9272	22.2106	34.6052	21.8566	27.0755	17.0852	0.991409	20.3983	9.85388			12.5394	0.0424462	12.8325	0.0520062	12.8343	0.052071	16.1824	16.2817	17.3128	18.6137	19.5067	18.9542	18.7817	18.4664	21.5348	22.1014	22.391	22.8151	22.2267	23.9897	24.9378	23.135	21.4182	22.3013	21.6017
gi|1790039792|gb|QHB85505.1|	gi|1790039792|gb|QHB85505.1|	1790039792	QHB85505.1	2-oxoglutarate dehydrogenase complex dihydrolipoyllysine-residue succinyltransferase	Escherichia coli BL21-AI	26	26	26	20	29.1813	40	25	19.5684	18.6014	24.6264	33.3125	24.4465	29.4061	19.2308	0.791332	23.5903	16.244	13.0648	0.0110209	16.6227	0.129793	15.4036	0.0557516	15.0712	0.0442791	20.1152	19.4333	16.7823	21.9429	19.7695	17.9764		18.0583	24.243	24.2481	24.9562	25.0584	24.8679	25.3003	25.1423	24.5736	23.8762	24.7132	24.1219
gi|1790040981|gb|QHB86694.1|	gi|1790040981|gb|QHB86694.1|	1790040981	QHB86694.1	methionine--tRNA ligase	Escherichia coli BL21-AI	22	22	22	37	26.4175	34	19	17.0344	16.856	22.0471	32.2836	21.5138	22.3069	17.252	1.16282	18.7	3.17254					15.9656	0.476747	15.4062	0.323493	15.8472	16.9456	16.182	19.1627	17.6568		15.8733	17.038	21.3203	21.1261	22.8114	22.9305	22.5026	23.2237	23.5957	21.9276	21.2413	21.8027	21.0362
gi|1790040684|gb|QHB86397.1|	gi|1790040684|gb|QHB86397.1|	1790040684	QHB86397.1	50S ribosomal protein L20	Escherichia coli BL21-AI	9	9	9	6	30.3086	48	32	21.6877	22.9637	26.6839	31.9167	24.3716	6.42584	22.1993	1.42565	24.0453	5.12536	20.1993	0.356426	21.9104	1.16693	22.0827	1.31499	22.061	1.29536	23.2669	21.9892	18.36	23.1347	22.6789	22.4514	23.4176	23.307	25.1685	27.7189	26.7603	27.0879	25.3314	26.0914	26.4902	25.5426	23.7819	25.8952	23.2704
gi|1790039361|gb|QHB85074.1|	gi|1790039361|gb|QHB85074.1|	1790039361	QHB85074.1	proline--tRNA ligase	Escherichia coli BL21-AI	36	36	36	29	28.9976	42	27	17.8269	18.8055	22.7986	31.3781	22.8909	33.4522	18.9379	2.15997	20.8024	7.86521	14.3702	0.0910782	13.504	0.0499675	17.4435	0.766646			18.2479	17.3679	18.0576	17.6342	18.4212	18.4496		19.5459	22.1208	22.2286	23.3753	23.4697	25.2029	26.4619	27.0585	25.1916	21.9058	22.9079	23.1154
gi|1790040683|gb|QHB86396.1|	gi|1790040683|gb|QHB86396.1|	1790040683	QHB86396.1	phenylalanine--tRNA ligase subunit alpha	Escherichia coli BL21-AI	15	15	15	20	27.1992	39	23	17.584	17.6845	22.495	30.0869	23.324	53.4461	16.6393	0.519549	20.7798	9.16321	14.6901	0.13454	14.4737	0.1158			13.0484	0.0431173	17.7769	16.5298	17.4684	18.5607	18.8641	17.8921	16.0879	17.8939	21.903	21.8018	22.7467	23.5287	21.9947	22.7223	23.0267	22.0099	22.8715	23.6552	23.3171
gi|1790042028|gb|QHB87741.1|	gi|1790042028|gb|QHB87741.1|	1790042028	QHB87741.1	30S ribosomal protein S4	Escherichia coli BL21-AI	19	19	19	12	31.512	48	32	21.9756	22.3428	26.8717	29.7752	26.6451	25.4473	22.3755	1.31935	25.4687	11.2593	19.0405	0.130749	19.2478	0.150949	20.0586	0.264796	19.2681	0.153087	22.244	22.2129	21.0039	22.4418	21.6122	22.7163	22.2086	22.8343	26.0669	26.607	27.2716	27.5413	26.6544	27.6922	28.0847	27.1067	25.1761	27.2227	26.7727
gi|1790041652|gb|QHB87365.1|	gi|1790041652|gb|QHB87365.1|	1790041652	QHB87365.1	D-3-phosphoglycerate dehydrogenase	Escherichia coli BL21-AI	11	11	11	16	25.7203	18	8	14.8034	14.8707	19.6955	29.6929	20.0973	39.2306															14.8034					14.8707	18.8839	18.592	20.4523	20.8536	21.7501	22.6151	23.2284	21.0139	17.0651	21.2989	19.8274
gi|1790042474|gb|QHB88187.1|	gi|1790042474|gb|QHB88187.1|	1790042474	QHB88187.1	F0F1 ATP synthase subunit delta	Escherichia coli BL21-AI	8	8	8	10	27.888	33	24	17.8403		22.7073	29.1802	22.3738	23.1589			20.3723	5.78361	18.8718	2.04408	18.3788	1.45247	20.0777	4.71543	19.0995	2.39356		17.8403							22.4423	22.0238	23.0792	23.2838	24.3345	24.9106	25.704	23.4085	20.7832	22.8287	22.74
gi|1790042469|gb|QHB88182.1|	gi|1790042469|gb|QHB88182.1|	1790042469	QHB88182.1	bifunctional UDP-N-acetylglucosamine diphosphorylase/glucosamine-1-phosphate N-acetyltransferase GlmU	Escherichia coli BL21-AI	6	6	6	21	23.8791	20	11	13.9521		18.8027	28.8521	18.4142	22.0405			17.2754	10.0093												13.9521					18.7663	18.8745	17.1709	20.3992	19.0913	20.7729	20.7928	20.6015	17.5126	18.8601	18.3156
gi|1790042662|gb|QHB88375.1|	gi|1790042662|gb|QHB88375.1|	1790042662	QHB88375.1	HslU--HslV peptidase ATPase subunit	Escherichia coli BL21-AI	27	27	27	28	28.4068	45	30	18.3461	20.0189	23.1934	28.7867	23.2905	30.7895	19.7085	2.57105	21.6635	9.96838	15.3303	0.123641	15.4639	0.135632	18.2043	0.906374	18.154	0.87529	17.8485	19.7619		17.428	20.0916	21.0907	18.1231	20.7703	22.5173	22.4509	23.8689	23.9367	23.8763	25.0809	25.6067	24.0379	21.9917	24.0678	22.9009
gi|1790041321|gb|QHB87034.1|	gi|1790041321|gb|QHB87034.1|	1790041321	QHB87034.1	glutamine-hydrolyzing GMP synthase	Escherichia coli BL21-AI	16	16	16	31	26.513	39	23	17.1329	17.5754	21.8823	26.8969	21.5156	20.8608	17.6849	1.46617	19.6551	5.74469	17.1265	0.995586	16.2531	0.54343	17.3881	1.19347	17.1261	0.995286	16.9715	17.3153	16.6857	17.5591	17.6102	17.3708	18.2032	17.1174	21.105	21.4178	22.3768	22.6295	22.4387	23.4202	23.3952	22.4587	21.3293	22.2741	20.7153
gi|1790041948|gb|QHB87661.1|	gi|1790041948|gb|QHB87661.1|	1790041948	QHB87661.1	LPS export ABC transporter ATP-binding protein	Escherichia coli BL21-AI	2	2	2	15	23.5372	17	9	14.0285		18.759	26.5478	17.6343	12.1742			17.3404	9.93066									14.0285								16.6702			20.8478	17.0293	20.7885		17.0842	16.5783	17.2004	16.6971
gi|1790042495|gb|QHB88208.1|	gi|1790042495|gb|QHB88208.1|	1790042495	QHB88208.1	macrodomain Ori organization protein MaoP	Escherichia coli BL21-AI	9	9	9	9	27.8355	35	20	18.8833	20.4653	23.5793	25.9203	23.3335	21.8599	18.2913	0.663439	21.9131	8.16745	15.856	0.122659			14.2466	0.0402011			18.0549		18.7579	19.837	21.0695	20.0212	20.0555	20.7152	23.7817	23.1136	23.4681	23.9537	24.1254	24.3294	24.0411	23.331	22.9772	23.9099	23.2329
gi|1790041240|gb|QHB86953.1|	gi|1790041240|gb|QHB86953.1|	1790041240	QHB86953.1	phosphoenolpyruvate-protein phosphotransferase PtsI	Escherichia coli BL21-AI	39	39	39	31	29.1448	41	26	18.7599	17.4327	23.3941	24.8336	23.5959	28.5613	18.8386	1.05606	21.9523	9.1417	17.1776	0.333954	16.2711	0.178151	18.6611	0.933831	17.8126	0.518602	18.6043	18.7039	18.5315	19.1997	16.0339	18.1268		18.1373	23.194	22.2543	24.1597	23.9684	24.7551	26.2892	27.5407	24.7467	22.6876	24.1174	23.3144
gi|1790041400|gb|QHB87113.1|	gi|1790041400|gb|QHB87113.1|	1790041400	QHB87113.1	CDP-diacylglycerol--serine O-phosphatidyltransferase	Escherichia coli BL21-AI	6	6	6	24	24.4315	22	12	14.8529	15.7931	19.4411	24.0545	18.8569	16.0446			16.3949	2.91213											14.8529				15.7931		17.2719	20.1357	19.9221	20.4347	20.3796	21.6244	22.4389	19.3299	16.7654	20.1887	18.7848
gi|1790040155|gb|QHB85868.1|	gi|1790040155|gb|QHB85868.1|	1790040155	QHB85868.1	3-oxoacyl-ACP reductase FabG	Escherichia coli BL21-AI	10	10	10	12	27.8268	37	21	18.5479	19.1041	23.1212	23.808	23.5126	31.227	18.4284	0.920566	22.3619	14.0647					17.2747	0.41375	16.9958	0.341026	17.8886	19.1304	19.0632	18.1092	19.2246	18.7436	19.3087	19.1397	22.5327	22.6188	22.8587	24.4746	23.7695	23.8521	24.0459	22.8583	22.4476	24.0584	23.502
gi|1790041799|gb|QHB87512.1|	gi|1790041799|gb|QHB87512.1|	1790041799	QHB87512.1	accessory factor UbiK family protein	Escherichia coli BL21-AI	2	2	2	7	23.8137	16	8	15.9881		20.541	23.472	18.279	4.89365																15.9881					20.2113	21.1234	20.3506	20.4785	20.5595	19.3998	19.0848	20.4111	18.4108	18.5574	18.291
gi|1790042089|gb|QHB87802.1|	gi|1790042089|gb|QHB87802.1|	1790042089	QHB87802.1	cAMP-activated global transcriptional regulator CRP	Escherichia coli BL21-AI	12	12	12	15	28.9107	42	27	20.2261	18.5987	24.7442	22.9126	24.1841	15.5411	20.1142	0.925346	22.9178	6.46062	15.191	0.0304991	15.0796	0.0282322	17.5196	0.153197	17.5721	0.158871	19.7264	20.2384		20.7136	18.8827	19.3733	16.3468	19.7918	23.619	24.6641	25.0966	25.5971	24.472	25.201	25.1699	24.8392	23.6888	24.872	23.5899
gi|1790040265|gb|QHB85978.1|	gi|1790040265|gb|QHB85978.1|	1790040265	QHB85978.1	formyltetrahydrofolate deformylase	Escherichia coli BL21-AI	9	9	9	14	26.2955	35	24	16.3387	18.2378	20.8352	22.5737	20.0706	13.2872	16.6118	1.2084	17.3702	2.04418	16.7414	1.32197	16.7485	1.32855	17.5529	2.32013	16.8694	1.44464	16.1117			16.5657	18.2378				20.5013	20.5309	20.5977	21.7112	22.3724	23.2395	23.3373	22.0902	19.2932	20.2162	20.3944
gi|1790042051|gb|QHB87764.1|	gi|1790042051|gb|QHB87764.1|	1790042051	QHB87764.1	50S ribosomal protein L4	Escherichia coli BL21-AI	19	19	19	11	31.0406	44	28	20.8718	19.8391	25.3663	22.5414	26.5229	50.2543	21.0481	1.13004	24.4731	12.1373	17.1692	0.0768099	17.936	0.130691	20.269	0.65849	19.5241	0.392935	20.6104	19.569	20.7035	22.6041	20.9061	19.6791	21.3166	17.4545	24.5982	25.068	25.8866	25.9123	26.1869	27.5413	27.3901	26.6196	24.6624	27.4773	26.5477
gi|1790042148|gb|QHB87861.1|	gi|1790042148|gb|QHB87861.1|	1790042148	QHB87861.1	maltodextrin phosphorylase	Escherichia coli BL21-AI	46	46	46	49	29.0075	48	32	19.7544	18.2245	24.2289	22.2309	24.0864	20.1411	19.0169	0.599807	22.9781	9.34185	15.3316	0.0466235	14.8217	0.0327423	17.5588	0.218311	16.4909	0.104132	19.6326	19.1342	20.0605	20.1901	18.0915	18.0455	17.9906	18.7702	23.8069	23.47	24.5112	25.1274	25.0752	25.5677	26.1017	25.0837	23.6755	24.4809	23.8133
gi|1790041970|gb|QHB87683.1|	gi|1790041970|gb|QHB87683.1|	1790041970	QHB87683.1	stringent starvation protein A	Escherichia coli BL21-AI	9	9	9	12	27.4098	27	16	18.6848	17.914	23.1426	21.975	22.6276	15.3783	18.7559	1.05052	21.5247	7.15977					14.6681	0.0617813			17.9745	19.395				17.914			22.2131	22.0936	23.8534	24.4102	22.7253	21.7576	24.1604	23.072	22.0101	23.1239	22.0324
gi|1790041137|gb|QHB86850.1|	gi|1790041137|gb|QHB86850.1|	1790041137	QHB86850.1	NADH-quinone oxidoreductase subunit NuoF	Escherichia coli BL21-AI	18	18	18	26	27.4737	37	25	17.4177	16.338	21.8279	21.2614	21.8124	21.0341	17.9992	1.49632	20.3062	7.40474	14.2025	0.107672	15.529	0.270036	14.2877	0.114228	15.4531	0.256211			17.4641	17.3714	16.6579		16.0182		21.7042	20.7101	22.1696	22.7278	23.633	24.5218	24.2315	23.7493	20.9182	22.2394	21.7884
gi|1790042115|gb|QHB87828.1|	gi|1790042115|gb|QHB87828.1|	1790042115	QHB87828.1	tryptophan--tRNA ligase	Escherichia coli BL21-AI	20	20	20	15	28.9597	29	17	18.7616	19.5001	23.157	21.044	23.0974	20.1924	20.4972	3.33023	21.1612	5.27633					16.3722	0.190856						18.7616	20.109	18.8773	19.5141		24.1292	20.6023	23.9914	23.905	25.1774	25.96	26.1821	24.842	21.9339	23.4709	23.272
gi|1790039322|gb|QHB85035.1|	gi|1790039322|gb|QHB85035.1|	1790039322	QHB85035.1	glutamate-1-semialdehyde 2,1-aminomutase	Escherichia coli BL21-AI	12	12	12	15	29.1226	44	30	18.6403	17.3849	23.0043	20.5917	23.2704	24.7629	17.506	0.455552	20.2424	3.03585	18.409	0.85185	15.4309	0.108111	14.9722	0.0786688	14.7992	0.0697767		18.5089		18.7717	17.329	17.6598	17.1054	17.4453	22.4067	22.307	23.7458	23.5577	24.0569	25.99	27.2904	24.4334	21.0768	24.1868	23.0267
gi|1790039725|gb|QHB85438.1|	gi|1790039725|gb|QHB85438.1|	1790039725	QHB85438.1	leucine--tRNA ligase	Escherichia coli BL21-AI	24	24	24	49	26.1457	33	18	17.2326	17.8318	21.5934	20.5472	20.9103	12.7974	15.9378	0.40761	18.9415	3.26926	12.1893	0.0303271							18.1846	17.5263	15.0748	18.1444	18.593	17.2377		17.6648	21.0463	20.974	21.8426	22.5108	22.0973	23.0052	24.0014	21.2223	20.3277	21.0969	20.8315
gi|1790042705|gb|QHB88418.1|	gi|1790042705|gb|QHB88418.1|	1790042705	QHB88418.1	50S ribosomal protein L7/L12	Escherichia coli BL21-AI	10	10	10	7	30.207	39	24	20.6054	20.1425	24.9532	20.3624	24.9115	19.7825	20.85	1.18479	23.9567	10.2059			17.7928	0.142348	19.4693	0.454996	17.9837	0.162481	21.7138		21.2213	18.8809	20.8823	19.6481	19.6162	20.4235	24.2721	24.6262	25.1816	25.7329	25.4921	25.5089	25.6146	25.9658	24.5916	25.375	24.8708
gi|1790041176|gb|QHB86889.1|	gi|1790041176|gb|QHB86889.1|	1790041176	QHB86889.1	beta-ketoacyl-ACP synthase I	Escherichia coli BL21-AI	23	23	23	16	31.1604	47	31	21.1128	20.7043	25.453	20.2556	25.9982	29.5575	21.1054	0.994918	24.2357	8.7115	18.7753	0.197854	19.0006	0.231287	22.6861	2.97579	21.0182	0.936539	21.6413	20.4366	20.6216	21.7516	21.1067	21.4128	20.3929	19.9048	24.8482	24.8885	26.2045	25.8711	26.7029	27.9668	28.047	26.4152	24.2595	26.9285	26.3256
gi|1790042026|gb|QHB87739.1|	gi|1790042026|gb|QHB87739.1|	1790042026	QHB87739.1	50S ribosomal protein L17	Escherichia coli BL21-AI	13	13	13	6	31.671	44	28	22.0688	22.0887	26.4057	20.2096	26.6667	24.217	21.2449	0.564916	23.6288	2.94867	19.3298	0.149796	17.3137	0.0370321	18.1694	0.0670124	16.5976	0.0225425	23.3009	22.232	20.1791	22.563	21.9767	23.1383	20.8761	22.3636	25.7316	25.5275	26.741	27.6228	26.3787	28.3305	29.0295	27.4008	23.6138	27.2767	27.7748
gi|1790039213|gb|QHB84926.1|	gi|1790039213|gb|QHB84926.1|	1790039213	QHB84926.1	carbamoyl-phosphate synthase large subunit	Escherichia coli BL21-AI	39	39	39	55	26.2065	26	14	15.7855	14.7101	20.0959	19.8403	20.8012	32.349			18.3637	5.97195					15.0004	0.580322			15.4592		16.7082	15.1892	14.7101				19.5356	18.4808	20.8019	21.5652	21.7388	22.9436	24.3063	22.1455	20.8655	21.2966	20.0727
gi|1790039692|gb|QHB85405.1|	gi|1790039692|gb|QHB85405.1|	1790039692	QHB85405.1	alkyl hydroperoxide reductase subunit C	Escherichia coli BL21-AI	13	13	13	10	29.3436	41	25	20.8985	21.4747	25.2083	19.8321	24.4376	11.6246	21.1187	1.16483	23.2635	5.15134	17.2686	0.0807738	17.1494	0.0743716	16.8056	0.0586014	16.7634	0.0569129	21.2606	19.1994	21.0739	22.0603	22.3376	21.0224	21.0354	21.5032	24.6382	24.7376	25.5381	25.9193	25.4314	25.6612	25.7054	24.9594	23.7795	24.7637	24.425
gi|1790042074|gb|QHB87787.1|	gi|1790042074|gb|QHB87787.1|	1790042074	QHB87787.1	30S ribosomal protein S12	Escherichia coli BL21-AI	5	5	5	5	29.95	46	31	20.4157	20.3996	24.6875	19.3173	24.7092	19.6094	20.3417	0.949991	23.3444	7.61395	20.1465	0.829772	19.1808	0.424869	18.8165	0.330062	19.7633	0.6362	19.9882	20.8959	19.6812	21.0976	20.2736	21.0466	19.8787		23.3038	24.2835	25.1164	26.0465	24.4207	26.6849	27.2076	26.1492	23.1941	25.8649	23.8739
gi|1790041277|gb|QHB86990.1|	gi|1790041277|gb|QHB86990.1|	1790041277	QHB86990.1	NADP-dependent oxaloacetate-decarboxylating malate dehydrogenase	Escherichia coli BL21-AI	10	10	10	41	24.2324	29	15	15.9996	17.0567	20.2056	18.4563	19.787	13.8078	15.2172	0.581391	18.692	6.46379									15.6526	16.5553	15.323	16.4674	16.4743	17.6391			19.4784	19.8206	20.6428	20.8806	19.8517	19.8138	21.2292	19.4001	19.4779	19.7195	19.3806
gi|1790042471|gb|QHB88184.1|	gi|1790042471|gb|QHB88184.1|	1790042471	QHB88184.1	F0F1 ATP synthase subunit beta	Escherichia coli BL21-AI	34	34	34	24	31.5896	48	32	21.7677	21.1968	25.956	18.231	26.9085	35.2804	22.2448	1.39195	24.3306	5.90924	19.8382	0.262531	19.5196	0.210504	21.6087	0.895681	21.1351	0.645007	23.3656	20.6653	21.7075	21.3323	20.4052	21.4594	21.6638	21.2589	25.7034	25.0092	26.6068	26.5046	26.9668	27.8551	28.4781	26.7129	25.1622	27.5094	26.9575
gi|1790040154|gb|QHB85867.1|	gi|1790040154|gb|QHB85867.1|	1790040154	QHB85867.1	ACP S-malonyltransferase	Escherichia coli BL21-AI	5	5	5	13	25.5408	21	11	16.6524		20.8105	17.8521	19.7418	8.51095			17.6153	1.94913											16.3712	16.9336					19.8975	19.7189	21.657	21.9684	21.5671	21.9916	22.4868	21.751	17.2422	20.0378	21.141
gi|1790041322|gb|QHB87035.1|	gi|1790041322|gb|QHB87035.1|	1790041322	QHB87035.1	IMP dehydrogenase	Escherichia coli BL21-AI	17	17	17	19	27.0106	43	28	18.0129	17.8199	22.1627	17.7508	21.5743	11.8058	17.7827	0.852485	20.2723	4.78769	18.4236	1.32929	18.2337	1.16537	17.0899	0.527408	16.8008	0.431624	19.2893	17.0148	18.3854	17.3622	18.267	17.9126		17.28	21.367	21.669	22.28	23.335	22.5844	23.9453	24.2891	22.741	20.909	22.56	21.2119
gi|1790042039|gb|QHB87752.1|	gi|1790042039|gb|QHB87752.1|	1790042039	QHB87752.1	30S ribosomal protein S14	Escherichia coli BL21-AI	5	5	5	2	30.9703	38	25	21.3963	21.3728	25.5432	17.7153	25.2933	14.8974			23.0101	3.06057	21.9455	1.46331	21.3729	0.983966	22.9838	3.00545	23.619	4.66784	21.5779		21.403	21.2079		21.3213	21.4242		23.4118	25.6479	26.7742	26.3389	26.3534	28.0638	29.2326	25.9834	24.2005	25.6994	25.5278
gi|1790039969|gb|QHB85682.1|	gi|1790039969|gb|QHB85682.1|	1790039969	QHB85682.1	serine--tRNA ligase	Escherichia coli BL21-AI	16	16	16	26	27.0111	32	16	17.9366	17.2205	22.0697	17.5468	21.7938	14.4924	18.1002	1.12008	19.5869	3.13891									18.7613	16.9106	16.8041	19.2704	17.4726	17.3798	17.7841	16.2454	21.9457	21.1148	22.6686	22.5498	23.431	23.4095	24.7032	22.291	21.3855	22.4544	21.1146
gi|1790042073|gb|QHB87786.1|	gi|1790042073|gb|QHB87786.1|	1790042073	QHB87786.1	30S ribosomal protein S7	Escherichia coli BL21-AI	17	17	17	7	32.3599	45	29	22.5491	23.6942	26.6758	17.4688	27.8159	38.5007	21.2375	0.402864	26.0479	11.3039	17.9213	0.0404461	17.2357	0.0251487	19.2282	0.100073	18.728	0.0707488	22.0938	23.2339	22.3656	22.5032	24.8535	22.8547	24.1689	22.8996	26.1355	26.2473	26.8318	27.4887	27.1946	28.5746	28.5394	27.5729	25.9157	28.6459	28.3022
gi|1790041974|gb|QHB87687.1|	gi|1790041974|gb|QHB87687.1|	1790041974	QHB87687.1	DUF1043 family protein	Escherichia coli BL21-AI	5	5	5	9	26.0719	26	14	18.5887	19.0407	22.6897	17.1602	21.4744	7.39073	18.779	1.14104	19.5134	1.89822									18.0139			19.1635	18.1858			19.8957	21.8624	22.7466	22.9545	23.1952	21.7592	22.0206	21.5281	21.2359	21.669	22.2419	20.4843
gi|1790040827|gb|QHB86540.1|	gi|1790040827|gb|QHB86540.1|	1790040827	QHB86540.1	aspartate--tRNA ligase	Escherichia coli BL21-AI	36	36	36	33	27.5452	23	11	16.7178	16.7106	20.8013	16.9537	21.3593	24.9587			18.5284	3.50788									15.8565	16.3559		17.9411		16.7106			20.6947	19.4513	21.6342	21.4251	23.0434	24.3712	26.3562	23.3113	18.9602	21.7846	21.4671
gi|1790042853|gb|QHB88566.1|	gi|1790042853|gb|QHB88566.1|	1790042853	QHB88566.1	elongation factor P	Escherichia coli BL21-AI	4	4	4	7	27.4233	30	15	19.0079	19.2148	23.0389	16.348	22.666	12.6246	18.3023	0.613183	21.0143	4.01796										19.0583	18.4745	19.4908	20.3076	18.7024	19.223	18.6262	22.9934	22.8035	23.5774	22.7813	23.5696	23.4501	24.2084	22.185	22.4219	23.0911	22.2855
gi|1790042354|gb|QHB88067.1|	gi|1790042354|gb|QHB88067.1|	1790042354	QHB88067.1	ADP-glyceromanno-heptose 6-epimerase	Escherichia coli BL21-AI	22	22	22	18	29.6871	42	26	20.0831	18.9268	24.0678	15.8313	24.656	23.8004	18.9207	0.446766	22.5555	5.54976	16.7418	0.0986686	17.0688	0.123765	19.7947	0.818831	18.56	0.347947	20.7943	19.8389	20.039	19.6602	20.0158	18.0941	18.0322	19.5651	23.2575	23.5714	24.6782	24.7642	25.2796	25.8825	26.9362	24.9977	23.0326	25.0786	24.9266
gi|1790039867|gb|QHB85580.1|	gi|1790039867|gb|QHB85580.1|	1790039867	QHB85580.1	DNA starvation/stationary phase protection protein Dps	Escherichia coli BL21-AI	16	16	16	12	29.9261	47	31	21.1804	21.2384	25.163	15.8088	25.0412	14.5284	21.3009	1.08718	24.1753	7.97212	17.6008	0.0836467	16.9455	0.0531121	19.195	0.252546	18.1824	0.125176	20.8013	20.9426	20.5824	22.3951	21.4545	21.1212	20.8981	21.4799	24.5627	24.6559	25.4806	25.9528	26.0569	25.8615	25.9468	25.5035	24.812	25.2066	24.9425
gi|1790039518|gb|QHB85231.1|	gi|1790039518|gb|QHB85231.1|	1790039518	QHB85231.1	transcription antitermination factor NusB	Escherichia coli BL21-AI	6	6	6	7	26.768	26	14	18.5356	18.8408	22.5065	15.6808	22.2408	13.0434	18.389	0.903402	20.9113	5.18982									17.2214	19.6331		18.7522				18.8408	21.6749	22.2791	22.892	23.1801	22.2537	22.7115	23.2989	22.2095	21.8124	22.4693	22.144
gi|1790041292|gb|QHB87005.1|	gi|1790041292|gb|QHB87005.1|	1790041292	QHB87005.1	4-hydroxy-tetrahydrodipicolinate synthase	Escherichia coli BL21-AI	7	7	7	13	26.7375	28	16	17.0089	20.3316	20.9705	15.58	22.5931	47.9764	20.162	8.896	19.5444	5.79787	17.1875	1.13185	14.11	0.134081								17.0089	19.2511		23.6707	18.0732	21.0628	20.4703	20.9776	21.3712	21.8433	22.2708	23.1936	21.3222	22.7678	23.2751	23.9053
gi|1790043068|gb|QHB88781.1|	gi|1790043068|gb|QHB88781.1|	1790043068	QHB88781.1	deoxyribose-phosphate aldolase	Escherichia coli BL21-AI	11	11	11	17	25.937	37	21	17.8916	17.5978	21.8444	15.4858	20.5398	6.26908	17.8335	0.960571	19.1709	2.42725	15.6653	0.213706	15.2622	0.161611					18.0995	17.9978	17.4007	18.0682	18.2011	17.3659	17.1346	17.6896	21.4949	21.2461	21.8208	22.8159	21.923	22.364	22.3802	21.1199	19.8833	21.0146	20.0601
gi|1790039338|gb|QHB85051.1|	gi|1790039338|gb|QHB85051.1|	1790039338	QHB85051.1	UMP kinase	Escherichia coli BL21-AI	9	9	9	10	26.893	40	26	18.0212	17.0537	21.941	15.1354	21.8869	14.5782	17.4204	0.659409	20.3182	4.91429	17.0292	0.502784	15.4802	0.171829	17.2803	0.598368	16.6975	0.399521	17.6639	18.3559		18.0438		17.3761	17.0972	16.6877	22.3678	21.1585	22.0685	22.1693	23.1119	23.3309	23.8492	22.4127	19.8796	22.3887	22.0669
gi|1790040238|gb|QHB85951.1|	gi|1790040238|gb|QHB85951.1|	1790040238	QHB85951.1	dihydroxyacetone kinase subunit DhaK	Escherichia coli BL21-AI	5	5	5	19	23.4568	17	7	15.0293		18.9372	15.0095	17.9789	7.72486														14.0745		15.9842					19.0883	17.261	19.2814	20.1178	19.902	20.2645	20.1313	19.8977	17.3769	18.5264	18.0333
gi|1790040964|gb|QHB86677.1|	gi|1790040964|gb|QHB86677.1|	1790040964	QHB86677.1	PTS galactitol transporter subunit IIB	Escherichia coli BL21-AI	2	2	2	5	29.4116	28	14	20.5757	20.7086	24.4799	14.9721	24.0854	11.3899	21.3912	1.75983	24.0274	10.9408									21.491	19.4761		20.7601		21.9989	19.8095	20.3175	22.3557	24.0052	25.8282	25.7307	22.7923	26.3424	26.4508	24.4718	21.7198	24.4073	25.0938
gi|1790040779|gb|QHB86492.1|	gi|1790040779|gb|QHB86492.1|	1790040779	QHB86492.1	PTS mannose transporter subunit IIAB	Escherichia coli BL21-AI	8	8	8	18	26.1667	40	25	17.6679	16.2759	21.5548	14.7934	21.016	10.183	15.6903	0.25392	20.153	5.59891	15.2766	0.190614	15.3348	0.198457	17.1157	0.681961	15.1046	0.169184	17.7606	16.3405		18.9026	16.4954	16.9761	15.5636	16.0683	21.5241	20.5319	22.5369	21.6261	21.5229	22.1598	22.3519	21.1336	20.8795	21.6277	19.5646
gi|1790040306|gb|QHB86019.1|	gi|1790040306|gb|QHB86019.1|	1790040306	QHB86019.1	aconitate hydratase AcnA	Escherichia coli BL21-AI	26	26	26	41	26.3805	38	24	17.2152	17.7837	21.062	14.388	20.283	8.38515	17.299	1.0598	18.1313	1.88707	13.4462	0.0733554			14.6258	0.166155	13.9635	0.104991	18.076	15.6236	17.0416	18.1195	17.2955		18.2718		20.8084	20.4699	21.6656	21.304	22.4739	23.1858	24.9279	21.8471	19.5582	21.012	20.3902
gi|1790042728|gb|QHB88441.1|	gi|1790042728|gb|QHB88441.1|	1790042728	QHB88441.1	isocitrate lyase	Escherichia coli BL21-AI	16	16	16	22	28.2284	48	32	19.0466	18.9295	22.8773	14.2289	22.8482	13.9443	18.8801	0.890997	21.2061	4.4675	17.0998	0.259388	16.5205	0.173611	18.4214	0.648335	17.3854	0.316177	19.6597	18.7566	18.9264	18.8437	18.2949	19.1396	19.1427	19.141	22.1252	22.2597	23.872	23.2524	23.0581	25.0362	25.3734	23.7074	21.2363	23.4687	23.0753
gi|1790039788|gb|QHB85501.1|	gi|1790039788|gb|QHB85501.1|	1790039788	QHB85501.1	succinate dehydrogenase membrane anchor subunit	Escherichia coli BL21-AI	2	2	2	4	26.4796	21	12	19.2674		23.0691	13.9446	21.9501	6.42064			21.1417	3.66625										19.4099		19.1249					21.6925	23.8769	23.2552	23.4516	21.8329	21.9673	21.7424	21.4627	21.4183	22.6172	21.5474
gi|1790041463|gb|QHB87176.1|	gi|1790041463|gb|QHB87176.1|	1790041463	QHB87176.1	alanine--tRNA ligase	Escherichia coli BL21-AI	27	27	27	52	26.2829	31	17	17.7314	16.513	21.5247	13.8639	21.3692	12.447	14.9613	0.146585	19.9026	4.50383					17.1981	0.690955				17.5154		17.9475	16.9281	17.2896	14.4606	17.3736	20.6867	20.9384	21.9338	22.5399	21.9682	22.5809	23.0337	22.2547	20.732	21.634	21.2381
gi|1790042027|gb|QHB87740.1|	gi|1790042027|gb|QHB87740.1|	1790042027	QHB87740.1	DNA-directed RNA polymerase subunit alpha	Escherichia coli BL21-AI	26	26	26	21	30.1654	48	32	21.6777	20.9832	25.4645	13.8013	25.3035	12.3438	20.3156	0.38901	24.2815	6.07876	19.9334	0.298472	19.1037	0.167931	20.7662	0.53163	20.4947	0.440421	22.7429	20.4212	21.7104	21.8365	20.9353	21.5221	21.2886	20.1868	24.9355	24.4847	26.3434	26.0943	25.6917	26.3152	27.598	25.5875	24.6109	25.5833	25.3602
gi|1790040283|gb|QHB85996.1|	gi|1790040283|gb|QHB85996.1|	1790040283	QHB85996.1	acyl-CoA thioester hydrolase YciA	Escherichia coli BL21-AI	3	3	3	7	23.4908	14	6	16.6632		20.4395	13.702	17.9502	2.44024														16.6632							19.7813		20.4855	21.0516	18.815		21.614	17.9086	17.705	17.6443
gi|1790039837|gb|QHB85550.1|	gi|1790039837|gb|QHB85550.1|	1790039837	QHB85550.1	molybdenum cofactor biosynthesis protein B	Escherichia coli BL21-AI	6	6	6	10	25.5129	26	13	17.7287	17.3881	21.4499	13.1886	20.8255	8.55566	17.5467	0.881475	18.8995	2.25137									17.9484	16.9368	17.5733	18.4562		17.3881			20.9238	21.1559	21.8784	21.8415	21.1139	21.6037	22.2404	21.3085	19.9927	21.028	20.9376
gi|1790039478|gb|QHB85191.1|	gi|1790039478|gb|QHB85191.1|	1790039478	QHB85191.1	porphobilinogen synthase	Escherichia coli BL21-AI	12	12	12	18	28.0794	44	28	19.7438	19.7257	23.4637	13.1761	23.3041	11.7966	18.247	0.354336	22.4504	6.52774	15.2956	0.0458098	15.1741	0.0421105	15.9376	0.0714846	15.0386	0.0383344	19.993	19.1174	19.2158	20.649	19.4455	19.1353	20.1159	20.2062	23.3237	23.1022	23.4914	23.9372	24.6201	24.6461	24.4192	23.7611	23.1648	23.2822	23.21
gi|1790041679|gb|QHB87392.1|	gi|1790041679|gb|QHB87392.1|	1790041679	QHB87392.1	methionine adenosyltransferase	Escherichia coli BL21-AI	17	17	17	22	28.9423	48	32	19.8307	19.799	23.5304	12.9931	23.6854	14.4669	19.6051	0.855231	22.0393	4.62217	16.3646	0.0904885	16.2565	0.0839581	18.7507	0.473045	17.3548	0.179749	20.5817	19.2641	19.2548	20.2222	20.4764	19.8187	19.2313	19.6696	23.4535	22.9562	23.8478	23.864	24.4257	25.3346	26.0526	24.4556	22.8211	24.4373	23.295
gi|1790039747|gb|QHB85460.1|	gi|1790039747|gb|QHB85460.1|	1790039747	QHB85460.1	glucosamine-6-phosphate deaminase	Escherichia coli BL21-AI	4	4	4	14	23.726	20	7	16.2522	16.8728	19.9121	12.6396	19.2431	7.94989			17.7622	2.84817									16.3825		15.8386	16.5354	17.4358			16.3099	19.0739			20.7503	19.5719	19.5626	21.5193	19.7426		19.2118	19.2882
gi|1790039791|gb|QHB85504.1|	gi|1790039791|gb|QHB85504.1|	1790039791	QHB85504.1	2-oxoglutarate dehydrogenase E1 component	Escherichia coli BL21-AI	48	48	48	48	29.1218	47	31	19.282	20.845	22.9085	12.3507	23.3368	16.6189	21.9933	6.5493	22.8818	12.1238	16.4551	0.140934	17.1828	0.233385	18.483	0.574767	17.5999	0.311635	21.6211	16.9154	17.7748	20.8166	22.6462	16.7991	22.1907	21.7441	22.6977	22.0041	23.5608	23.3715	24.164	25.8073	26.8694	24.6439	22.1875	23.2575	24.3817
gi|1790041088|gb|QHB86801.1|	gi|1790041088|gb|QHB86801.1|	1790041088	QHB86801.1	DNA topoisomerase (ATP-hydrolyzing) subunit A	Escherichia coli BL21-AI	9	9	9	42	24.906	28	15	15.8686	16.0215	19.4838	12.2543	19.1554	9.75972	14.7661	0.465706	17.7512	3.68758									15.459		15.1768	16.9698			16.8829	15.1602	18.9255	18.6085	19.9444	20.4568	23.8581	20.2712	20.4981	20.1436	18.649	19.5843	18.7009
gi|1790042447|gb|QHB88160.1|	gi|1790042447|gb|QHB88160.1|	1790042447	QHB88160.1	tryptophanase	Escherichia coli BL21-AI	36	36	36	23	32.9485	48	32	24.7933	24.535	28.4074	12.2448	28.2082	10.6652	24.6782	0.92328	27.1806	5.23175	20.062	0.0376472	19.3047	0.0222719	20.7552	0.0608723	20.2507	0.0429077	24.8962	24.3482	24.9004	25.0285	24.7601	24.287	24.2772	24.8159	28.0986	27.6097	28.7429	29.1784	28.865	29.3615	29.7599	28.7139	27.9245	28.4264	28.0131
gi|1790040290|gb|QHB86003.1|	gi|1790040290|gb|QHB86003.1|	1790040290	QHB86003.1	tryptophan synthase subunit alpha	Escherichia coli BL21-AI	10	10	10	15	26.7768	23	11	17.8699	17.9764	21.4753	12.1719	21.7116	14.3374			19.275	2.64842										17.4418	17.5851	18.5827		17.9764			21.1147	19.5828	22.3138	22.8901	23.3584	23.9586	24.5458	23.174	21.2687	21.903	21.8316
gi|1790039757|gb|QHB85470.1|	gi|1790039757|gb|QHB85470.1|	1790039757	QHB85470.1	alpha-D-glucose phosphate-specific phosphoglucomutase	Escherichia coli BL21-AI	21	21	21	30	27.1578	34	18	18.1024	17.5359	21.6915	12.0345	21.6358	11.5792	17.4519	0.637058	19.3953	2.45027					16.3313	0.292988			18.7239	18.0277	17.7173	17.9405	19.0055	17.5021	15.8077	17.8282	21.4756	20.9102	21.9762	22.4038	22.8421	23.7834	25.2644	23.0017	19.9586	22.4598	21.6272
gi|1790040245|gb|QHB85958.1|	gi|1790040245|gb|QHB85958.1|	1790040245	QHB85958.1	ribose-phosphate diphosphokinase	Escherichia coli BL21-AI	15	15	15	13	29.6378	43	27	20.6402	20.3608	24.2215	11.9698	24.4774	14.2926	20.1462	0.710041	22.9027	4.7983	16.2693	0.0483317	15.5352	0.0290567	20.7665	1.09149	17.1776	0.0907061	20.9822	19.9471	20.8886	20.743	20.6542	20.7106	19.3896	20.6888	23.9895	23.0107	24.7075	25.1785	25.416	26.401	27.0966	25.1612	23.7104	24.9825	24.4278
gi|1790043088|gb|QHB88801.1|	gi|1790043088|gb|QHB88801.1|	1790043088	QHB88801.1	two-component system response regulator ArcA	Escherichia coli BL21-AI	11	11	11	11	28.235	34	24	19.8306	18.8298	23.4036	11.9015	23.3909	11.7972	19.2389	0.663585	22.1966	5.15513			16.0519	0.0728642	17.3262	0.176247	16.6289	0.108697				19.8306			18.8298		23.3054	22.6528	23.5698	24.0866	23.7816	24.6645	24.9771	23.3604	22.0799	24.4422	22.9621
gi|1790042905|gb|QHB88618.1|	gi|1790042905|gb|QHB88618.1|	1790042905	QHB88618.1	30S ribosomal protein S18	Escherichia coli BL21-AI	6	6	6	3	31.4153	48	32	23.7531	22.9389	27.3124	11.7888	26.2284	5.56084	23.3817	0.773052	24.8321	2.11253	21.1004	0.159028	21.2571	0.177264	22.3235	0.371245	22.4148	0.395486	24.0192	23.7446	23.8054	23.4432	22.9853	23.7935	22.7785	22.1984	25.8328	27.0571	28.3591	28.0007	26.4616	27.5511	28.0774	26.8099	25.1839	26.4937	26.4009
gi|1790041786|gb|QHB87499.1|	gi|1790041786|gb|QHB87499.1|	1790041786	QHB87499.1	antibiotic biosynthesis monooxygenase	Escherichia coli BL21-AI	5	5	5	5	29.5022	29	16	20.8103	20.1796	24.3658	11.7576	24.2056	10.5222	20.396	0.750407	26.3513	46.5619									21.2167	20.6823	20.7621	20.5798		20.1796			23.6531	23.9196	24.8228	25.0677	24.2364	24.6249	25.1607	24.1223	23.8519	24.1982	24.0812
gi|1790043162|gb|QHB88875.1|	gi|1790043162|gb|QHB88875.1|	1790043162	QHB88875.1	translation initiation factor IF-3	Escherichia coli BL21-AI	7	7	7	7	28.4072	28	14	19.9961	18.3195	23.502	11.3598	23.2766	9.71685			20.6575	1.58158					17.6113	0.19146			20.7908		19.7564	19.4412	15.359	20.8685		18.7311	22.8836	23.1399	23.6986	24.286	24.4302	25.0597	25.7792	24.2802	22.6536	24.1647	22.6289
gi|1790040467|gb|QHB86180.1|	gi|1790040467|gb|QHB86180.1|	1790040467	QHB86180.1	oxaloacetate-decarboxylating malate dehydrogenase	Escherichia coli BL21-AI	11	11	11	27	24.796	19	10	14.4651		17.965	11.3125	17.7415	9.68898			16.4579	3.98011											14.4651						15.1972		18.773	19.9247	20.2646	21.9437	23.3072	20.5492	15.4414	18.4252	17.4533
gi|1790039206|gb|QHB84919.1|	gi|1790039206|gb|QHB84919.1|	1790039206	QHB84919.1	isoleucine--tRNA ligase	Escherichia coli BL21-AI	19	19	19	54	25.3882	41	25	17.5243	17.1157	21.0039	11.1548	20.3233	6.95966	16.5882	0.522663	19.0359	2.85135	15.956	0.337216	13.5885	0.0653468	15.9864	0.3444	16.5822	0.520481	18.663	16.7125	16.6221	18.0994	19.2476	17.0595	16.4563	15.6995	20.9617	19.9242	21.2037	21.9259	21.8332	21.8153	22.3948	21.0013	19.9813	20.9823	20.0593
gi|1790040008|gb|QHB85721.1|	gi|1790040008|gb|QHB85721.1|	1790040008	QHB85721.1	aminopeptidase N	Escherichia coli BL21-AI	21	21	21	47	26.016	31	15	17.9685	17.3425	21.4422	11.1093	21.0021	8.18836	17.1136	0.552888	19.7847	3.52147									17.7994	17.5221	17.9446	18.608	18.3469	17.4213	16.2681	17.3339	21.1715	20.4505	22.184	21.9629	22.4437	22.0029	22.3784	22.106	20.6853	21.311	20.6545
gi|1790040609|gb|QHB86322.1|	gi|1790040609|gb|QHB86322.1|	1790040609	QHB86322.1	glutathione transferase GstA	Escherichia coli BL21-AI	6	6	6	12	27.0662	32	16	19.4258	18.7646	22.8934	11.0622	22.2273	6.97131	19.1098	0.803285	20.7095	2.43463									18.6443	19.8856	19.1301	20.0433	19.5613	18.692	18.1307	18.6742	22.3868	22.2656	23.3423	23.5789	23.5005	23.2403	23.2378	22.5913	22.0247	22.6863	21.8239
gi|1790039460|gb|QHB85173.1|	gi|1790039460|gb|QHB85173.1|	1790039460	QHB85173.1	beta-galactosidase	Escherichia coli BL21-AI	19	19	19	51	25.2658	30	16	16.9582	17.2076	20.4175	10.9989	20.3807	10.722			18.0217	2.08999	13.1666	0.0722143			14.7034	0.209537			16.8688	15.4803	18.1551	17.3284	18.3704		16.0448		20.0917	19.167	21.4442	20.9669	21.688	21.5383	22.6737	21.1272	19.7763	20.2203	20.9734
gi|1790042079|gb|QHB87792.1|	gi|1790042079|gb|QHB87792.1|	1790042079	QHB87792.1	FKBP-type peptidyl-prolyl cis-trans isomerase	Escherichia coli BL21-AI	15	15	15	15	29.0195	33	18	19.8542	17.9362	23.2972	10.8759	23.5437	12.9024	17.5792	0.206614	22.5631	6.53829					18.8502	0.498634	14.8614	0.0314073	19.5421	19.6265	19.8141	20.4339		18.8113	17.0526	17.9448	22.8826	22.9622	23.6196	23.7244	24.0284	23.9554	24.0531	23.2423	23.6674	23.9064	23.0935
gi|1790039295|gb|QHB85008.1|	gi|1790039295|gb|QHB85008.1|	1790039295	QHB85008.1	carbonate dehydratase	Escherichia coli BL21-AI	5	5	5	9	26.1874	28	14	18.658	18.0326	22.0962	10.8391	21.4702	7.02346	18.747	1.06365	20.1322	2.77836									19.3456		18.235	18.3934		17.0999	18.7981	18.1998	21.5111	21.9412	21.9179	23.0145	22.6686	21.963	22.602	19.9016	21.6476	21.4973	21.2032
gi|1790042647|gb|QHB88360.1|	gi|1790042647|gb|QHB88360.1|	1790042647	QHB88360.1	6-phosphofructokinase	Escherichia coli BL21-AI	11	11	11	18	27.913	40	24	19.9337	19.1382	23.3695	10.8217	23.0198	8.49235	18.4869	0.366844	21.6901	3.37865	14.1199	0.0177783	13.0399	0.00840927			15.7742	0.0559588	20.4171	19.2341	20.0435	20.0399	19.6566	19.9046	18.284	18.7077	22.6308	22.7692	23.8069	24.2712	24.2037	24.2078	24.5577	23.5601	22.3928	22.9274	23.2974
gi|1790042043|gb|QHB87756.1|	gi|1790042043|gb|QHB87756.1|	1790042043	QHB87756.1	30S ribosomal protein S17	Escherichia coli BL21-AI	4	4	4	2	31.5333	35	20	22.9821	22.4358	26.4169	10.8139	25.9149	7.63619	23.4229	1.35734	25.3895	5.3054					18.9883	0.0627697	18.9881	0.0627601	24.4904	21.6172	23.9018	21.9189	21.9511	23.9077		21.4484	24.5835	26.1232	27.4839	27.477	27.3635	28.3207	28.7757	26.3752	24.8022	27.2033	25.6466
gi|1790042227|gb|QHB87940.1|	gi|1790042227|gb|QHB87940.1|	1790042227	QHB87940.1	oligopeptidase A	Escherichia coli BL21-AI	19	19	19	36	25.2091	30	15	16.977	16.3608	20.3997	10.7235	19.961	7.91181	16.2741	0.614337	17.6791	1.62692									16.2011		17.469	17.261	16.9009	16.0295	16.1308	16.3819	20.3094	19.1117	20.7476	21.4301	21.8683	22.6146	22.4015	20.2938	19.2579	20.2281	20.1225
gi|1790042704|gb|QHB88417.1|	gi|1790042704|gb|QHB88417.1|	1790042704	QHB88417.1	50S ribosomal protein L10	Escherichia coli BL21-AI	16	16	16	8	31.6144	48	32	23.8196	24.0379	27.2363	10.6788	27.0053	9.09894	23.9027	1.05925	25.2902	2.77122	22.4185	0.378625	19.1496	0.03928	20.94	0.135872	20.8345	0.126295	24.2393	23.9708	23.1347	23.9337	24.4017	24.5	23.4863	23.7637	26.7891	27.0107	27.47	27.6755	26.9762	28.0708	28.3035	27.1652	25.9994	27.3201	27.3805
gi|1790041846|gb|QHB87559.1|	gi|1790041846|gb|QHB87559.1|	1790041846	QHB87559.1	glucuronate isomerase	Escherichia coli BL21-AI	8	8	8	33	24.0925	27	14	16.0903	15.3157	19.5025	10.6459	18.9722	7.37126	16.1349	1.03142	16.8145	1.65197									15.983	14.878		17.41	16.4505	14.181			19.1533	17.8952	20.5061	20.4555	20.9476	20.566	21.0787	20.1167	18.915	18.3115	19.318
gi|1790041420|gb|QHB87133.1|	gi|1790041420|gb|QHB87133.1|	1790041420	QHB87133.1	nucleotide exchange factor GrpE	Escherichia coli BL21-AI	3	3	3	9	26.6577	24	12	18.5201	17.7794	21.9114	10.4925	21.3143	6.93631			20.9593	5.42323									17.732	18.7393		19.0891			17.7794		21.0996	21.3901	22.5116	22.6444	22.9646	22.0144	22.6497	23.1349	20.9789	22.1557	20.2474
gi|1790039789|gb|QHB85502.1|	gi|1790039789|gb|QHB85502.1|	1790039789	QHB85502.1	succinate dehydrogenase flavoprotein subunit	Escherichia coli BL21-AI	19	19	19	31	27.6148	48	32	19.3298	19.3625	22.7172	10.4643	22.0782	6.71949	18.5946	0.600737	21.0312	3.25216	15.4857	0.0696315	15.2441	0.0588961	16.333	0.125273	17.0231	0.202116	19.6735	19.1878	19.0885	19.3695	19.4014	18.973	19.7431	19.3324	21.3403	22.084	23.8139	23.6307	24.0182	24.3054	25.2356	23.5894	21.5858	22.3314	22.0644
gi|1790042049|gb|QHB87762.1|	gi|1790042049|gb|QHB87762.1|	1790042049	QHB87762.1	50S ribosomal protein L2	Escherichia coli BL21-AI	25	25	25	14	31.4713	47	31	23.0031	23.3328	26.3877	10.4438	26.312	9.91044	22.967	0.975275	24.9455	3.84355	18.2969	0.038308	17.5564	0.0229286	19.8601	0.113204	17.8226	0.0275758	23.004	22.971	22.9454	23.092	22.9146	23.7404	23.2456	23.4307	25.277	26.3258	26.8699	27.078	26.4914	27.947	29.0028	26.9611	25.0921	27.0253	26.2523
gi|1790040628|gb|QHB86341.1|	gi|1790040628|gb|QHB86341.1|	1790040628	QHB86341.1	Grx4 family monothiol glutaredoxin	Escherichia coli BL21-AI	6	6	6	7	28.5413	39	24	20.5264	20.3414	23.9058	10.4062	23.5954	8.39198	20.0331	0.710423	22.4558	3.80893	18.4913	0.243993	17.4839	0.121369	16.9303	0.0826912	17.4279	0.116748	20.78	21.2014	20.0254	20.0987	19.7861	20.3982		20.8399	22.4915	23.9979	24.4917	24.6419	25.1501	24.6091	25.0886	24.7079	22.5679	24.3941	23.6208
gi|1790041971|gb|QHB87684.1|	gi|1790041971|gb|QHB87684.1|	1790041971	QHB87684.1	30S ribosomal protein S9	Escherichia coli BL21-AI	14	14	14	6	31.1166	48	32	22.8002	22.5933	26.1762	10.3819	26.6653	14.5726	22.3025	0.708238	25.3036	5.67039	20.223	0.167569	21.0326	0.293714	22.2082	0.66345	22.1921	0.6561	24.2784	21.9017	22.22	22.8005	22.7243	22.8898	23.0004	21.7588	25.3239	25.9473	26.6542	26.7792	26.116	26.7712	27.0736	25.9671	24.8357	27.5089	27.0997
gi|1790041131|gb|QHB86844.1|	gi|1790041131|gb|QHB86844.1|	1790041131	QHB86844.1	NADH-quinone oxidoreductase subunit L	Escherichia coli BL21-AI	2	2	2	14	25.7206	27	16	18.1486	17.8048	21.4952	10.1726	21.2749	8.73215	18.6233	1.38963	20.946	6.95204									18.1486					18.6509	16.9588		20.0367	22.4466	21.9155	21.582	21.2439	21.3915	20.7933	21.4223	21.1587	21.5877	20.834
gi|1790039337|gb|QHB85050.1|	gi|1790039337|gb|QHB85050.1|	1790039337	QHB85050.1	elongation factor Ts	Escherichia coli BL21-AI	28	28	28	21	30.3044	48	32	22.7718	22.6056	26.1142	10.1428	25.5229	6.73238	22.2797	0.710979	24.516	3.35019	19.6829	0.117529	19.2408	0.0865092	20.4478	0.199713	20.475	0.203517	23.3116	22.2809	22.465	23.0296	22.6503	22.9504	22.3877	22.4339	25.4826	25.8659	26.4732	26.6349	26.13	26.4257	26.4802	25.657	25.0016	26.0997	25.075
gi|1790042880|gb|QHB88593.1|	gi|1790042880|gb|QHB88593.1|	1790042880	QHB88593.1	adenylosuccinate synthase	Escherichia coli BL21-AI	30	30	30	23	29.2937	47	31	21.0211	20.5521	24.3536	10.0732	23.8702	7.20558	20.0631	0.514764	22.5833	2.95307	15.288	0.0187998	14.2495	0.00915244	16.2765	0.0373022	15.1996	0.0176825	21.0262	20.9678	20.6157	21.4748	21.7407	21.4193	18.8409	20.2075	23.6805	23.6695	24.8079	25.2563	25.3429	26.498	26.8492	25.4085	23.2624	24.1628	23.9133
gi|1790039333|gb|QHB85046.1|	gi|1790039333|gb|QHB85046.1|	1790039333	QHB85046.1	2,3,4,5-tetrahydropyridine-2,6-dicarboxylate N-succinyltransferase	Escherichia coli BL21-AI	20	20	20	14	29.7198	48	32	21.8921	20.9584	25.2026	9.92114	24.7485	7.24245	21.3055	0.665923	24.2749	5.21565	16.6092	0.0256869	16.1766	0.0190314	17.908	0.0631958	17.2073	0.0388806	22.5127	22.7783	20.0447	22.2326	21.0457	22.4961	19.4704	20.8213	24.8723	24.571	25.5351	25.8319	25.6761	25.7263	26.2318	25.5678	24.4817	25.1435	24.7372
gi|1790042673|gb|QHB88386.1|	gi|1790042673|gb|QHB88386.1|	1790042673	QHB88386.1	catalase/peroxidase HPI	Escherichia coli BL21-AI	18	18	18	37	26.0618	35	20	18.2551	18.5224	21.5568	9.86097	21.3533	8.56379	19.4552	2.29756	20.7395	5.5961					16.7575	0.354141	15.9866	0.207545	19.9267	18.5808	15.3637	19.1491	17.7736	19.8759	17.9178		21.6164	20.5901	21.9416	22.0791	21.7296	21.7152	22.1222	21.444	21.2625	21.7668	20.6716
gi|1790042042|gb|QHB87755.1|	gi|1790042042|gb|QHB87755.1|	1790042042	QHB87755.1	50S ribosomal protein L14	Escherichia coli BL21-AI	9	9	9	7	30.5585	44	28	22.7075	22.2675	26.0041	9.82629	25.6917	7.9131	22.6056	0.931813	24.6657	3.88583	18.2804	0.0464866	17.6167	0.0293443	18.0834	0.0405532	18.5318	0.0553344	22.9056	22.5823	22.5788	22.7631	22.3784	22.4578	23.0873	21.1466	24.7358	26.0153	26.4127	26.8527	25.6486	27.0099	26.9798	26.351	24.6839	26.5111	25.4346
gi|1790042657|gb|QHB88370.1|	gi|1790042657|gb|QHB88370.1|	1790042657	QHB88370.1	glycerol kinase GlpK	Escherichia coli BL21-AI	35	35	35	29	31.1887	48	32	22.7858	22.3324	26.0733	9.76386	27.1608	20.7486	22.1775	0.655975	24.5303	3.35078	18.8945	0.0673894	19.236	0.0853864	21.1843	0.32952	20.464	0.200016	22.9524	22.5031	22.5125	23.1753	22.5104	22.0681	22.3358	22.4154	25.7752	25.2627	26.5088	26.7464	26.487	27.3952	27.8272	26.4089	26.9829	27.4602	27.0265
gi|1790041123|gb|QHB86836.1|	gi|1790041123|gb|QHB86836.1|	1790041123	QHB86836.1	stress response protein ElaB	Escherichia coli BL21-AI	3	3	3	6	23.2808	16	8	16.7796	18.5764	20.048	9.63632	18.5478	3.40641														16.7796			18.5764				20.5235	19.6707	20.3296	19.6684	19.4392	18.3312	19.2737		18.2184	18.6234	18.7385
gi|1790042862|gb|QHB88575.1|	gi|1790042862|gb|QHB88575.1|	1790042862	QHB88575.1	fumarate reductase (quinol) flavoprotein subunit	Escherichia coli BL21-AI	9	9	9	33	24.3869	27	14	16.0417	17.0193	19.3069	9.61412	18.495	5.47657	14.7291	0.402591	16.7656	1.65156											15.9425	16.141	16.2216	14.8786		19.9579	17.6784	18.1913	20.465	20.8928	20.486	21.3147	21.6549	20.3434	18.5381	18.7151	18.0346
gi|1790039987|gb|QHB85700.1|	gi|1790039987|gb|QHB85700.1|	1790039987	QHB85700.1	30S ribosomal protein S1	Escherichia coli BL21-AI	51	51	51	26	30.4114	48	32	22.5084	21.7007	25.7582	9.51236	25.5356	8.15207	22.0176	0.711628	24.3113	3.48914	19.9987	0.175585	19.615	0.134586	21.5827	0.526418	21.0459	0.362841	22.5552	21.899	22.6021	22.9776	22.2639	22.024	21.3146	21.2004	25.2968	25.2291	25.9532	26.5539	26.3227	26.7196	27.2563	25.6644	24.6426	26.1462	25.3645
gi|1790043172|gb|QHB88885.1|	gi|1790043172|gb|QHB88885.1|	1790043172	QHB88885.1	L-arabinose ABC transporter permease AraH	Escherichia coli BL21-AI	3	3	3	9	24.7488	25	12	17.4735	18.3958	20.7165	9.46779	19.907	5.40212			18.4159	1.92179									18.0857		16.8956	17.4391		18.7368		18.0548	20.32	20.0446	20.7157	21.7856	21.019	19.2829	21.3568	20.3894	20.6083	20.0175	18.7824
gi|1790041591|gb|QHB87304.1|	gi|1790041591|gb|QHB87304.1|	1790041591	QHB87304.1	NADP(H)-dependent aldo-keto reductase	Escherichia coli BL21-AI	4	4	4	14	25.0472	23	14	18.2199		21.4486	9.37439	21.1268	7.49979	17.5963	0.649056	18.3435	1.08942					14.8429	0.0962527						18.2199					20.9981	20.5276	22.0613	22.2075	21.2866	20.6474	20.2788	20.5401	20.893	21.1359	21.3759
gi|1790042334|gb|QHB88047.1|	gi|1790042334|gb|QHB88047.1|	1790042334	QHB88047.1	mannitol-1-phosphate 5-dehydrogenase	Escherichia coli BL21-AI	10	10	10	19	27.5886	42	26	19.8917	20.3123	23.1171	9.35292	22.5735	6.41678	18.999	0.538612	21.0402	2.21688	16.4916	0.0947253			16.4875	0.0944561	16.3015	0.0830323	20.421	20.1342	18.8001	20.2115	21.1222	20.4177	19.5785	20.1306	22.5849	22.8601	23.3181	23.7054	23.5081	23.9926	24.7755	23.5622	22.3095	22.7433	22.4681
gi|1790041643|gb|QHB87356.1|	gi|1790041643|gb|QHB87356.1|	1790041643	QHB87356.1	aminomethyl-transferring glycine dehydrogenase	Escherichia coli BL21-AI	33	33	33	39	28.6731	48	32	21.4106	20.3315	24.599	9.11615	24.5799	8.99619	20.3917	0.493487	22.538	2.18466	16.1351	0.0258173	15.7084	0.0192069	17.3824	0.0612924	17.7066	0.0767349	21.1656	21.2374	21.3038	21.9356	21.7084	20.6273	19.3483	19.6422	24.2848	24.096	24.8864	25.1288	24.3653	24.562	24.4693	23.8829	24.9594	24.6601	24.3035
gi|1790042769|gb|QHB88482.1|	gi|1790042769|gb|QHB88482.1|	1790042769	QHB88482.1	MmcQ/YjbR family DNA-binding protein	Escherichia coli BL21-AI	3	3	3	5	27.2928	32	16	19.8717	19.8197	23.0537	9.0758	22.5569	6.43194	19.7419	0.91398	21.1332	2.39756									19.8585	20.0577	19.3555	20.2149	21.0169	19.8502	19.1551	19.2568	22.2876	22.5441	23.3418	24.0413	22.9714	23.7008	23.5388	23.2058	21.9516	22.8992	22.7503
gi|1790040157|gb|QHB85870.1|	gi|1790040157|gb|QHB85870.1|	1790040157	QHB85870.1	beta-ketoacyl-ACP synthase II	Escherichia coli BL21-AI	13	13	13	18	30.3376	47	31	22.2125	21.8631	25.3916	9.05771	25.0766	7.28112	21.6888	0.695591	23.7403	2.88355	19.4753	0.149984	18.7485	0.0906255	20.669	0.343071	20.0608	0.225058	23.3789	20.8868	22.3398	22.2443	21.9652	22.0827	21.2497	22.1549	24.6449	24.838	26.1572	25.9263	25.6611	26.6988	27.7392	25.7816	23.9781	25.528	25.0407
gi|1790041770|gb|QHB87483.1|	gi|1790041770|gb|QHB87483.1|	1790041770	QHB87483.1	2,5-didehydrogluconate reductase DkgA	Escherichia coli BL21-AI	4	4	4	19	24.8237	29	14	17.2549	17.8454	20.4095	8.90482	19.9027	6.26721	16.6892	0.675639	18.3214	2.09433									18.1281	16.0957	16.7029	18.0929	18.2956		17.5122	17.7284	19.7598	20.1572	20.7044	21.0166	21.0534	21.1418	20.8824	20.3596	19.6062	19.7573	20.4256
gi|1790042941|gb|QHB88654.1|	gi|1790042941|gb|QHB88654.1|	1790042941	QHB88654.1	alpha,alpha-phosphotrehalase	Escherichia coli BL21-AI	13	13	13	25	27.3262	40	24	19.9104	19.6348	23.063	8.89278	22.5589	6.26999	19.3319	0.669664	21.5984	3.22221					17.138	0.146361	16.509	0.0946377	19.418	19.2514	20.5362	20.4359	20.364	19.7244	18.6703	19.7804	22.8086	22.5737	22.9876	23.8821	23.1466	23.6562	23.6604	22.7463	21.7501	22.7064	22.9029
gi|1790041921|gb|QHB87634.1|	gi|1790041921|gb|QHB87634.1|	1790041921	QHB87634.1	argininosuccinate synthase	Escherichia coli BL21-AI	18	18	18	26	26.3479	26	14	18.109	16.8096	21.2536	8.84378	20.9903	7.36829			18.758	1.56816					14.3342	0.0730607						18.109	17.1096		16.6867	16.6325	21.1406	20.4282	21.5653	21.8804	21.3926	23.1994	23.5198	21.1675	19.6722	21.2727	21.2395
gi|1790039331|gb|QHB85044.1|	gi|1790039331|gb|QHB85044.1|	1790039331	QHB85044.1	DUF3461 family protein	Escherichia coli BL21-AI	16	16	16	7	28.9509	32	16	20.9195	20.9161	24.0625	8.83363	23.5331	6.12011	20.7726	0.903211	22.2313	2.48243									22.0511	20.1848	20.4704	20.9718	21.6178	19.7423	21.5333	20.7709	23.479	23.5417	24.7026	24.5268	25.9065	25.3518	25.5955	25.6531	23.284	24.1571	23.2245
gi|1790042707|gb|QHB88420.1|	gi|1790042707|gb|QHB88420.1|	1790042707	QHB88420.1	DNA-directed RNA polymerase subunit beta	Escherichia coli BL21-AI	79	79	79	78	28.7662	48	32	19.9567	19.9508	23.0924	8.78915	23.5574	12.1312	18.7762	0.441208	21.8534	3.72362	16.2868	0.0785686	16.2185	0.074935	17.6838	0.206919	17.5671	0.19083	19.9492	18.932	20.252	20.6936	20.8901	20.1134	19.2091	19.5905	23.1634	21.9601	23.4874	23.7589	24.2862	24.9029	26.9629	23.7938	22.9954	23.856	23.1999
gi|1790041820|gb|QHB87533.1|	gi|1790041820|gb|QHB87533.1|	1790041820	QHB87533.1	30S ribosomal protein S21	Escherichia coli BL21-AI	7	7	7	2	30.4033	34	19	22.2027	21.9187	25.3318	8.74916	24.327	4.36003	20.7077	0.354796	22.9689	1.70079	19.1358	0.119339	16.7314	0.0225412						21.9355	22.5118	22.1608	21.3734	22.7853	23.0893	20.4269	23.1377	25.8531	25.7295	26.607	24.9516	27.7876	28.3015	25.8562	20.5678	25.9142	25.4855
gi|1790041653|gb|QHB87366.1|	gi|1790041653|gb|QHB87366.1|	1790041653	QHB87366.1	ribose-5-phosphate isomerase RpiA	Escherichia coli BL21-AI	6	6	6	8	28.0573	46	31	20.5336	20.7128	23.6522	8.68499	22.9989	5.52245	20.0175	0.699255	22.0411	2.84315	17.1366	0.0949297	17.5337	0.125004	16.9899	0.0857509	17.8634	0.157103	20.3367	20.0102		21.254	21.8653	20.4868	19.5783	20.9206	23.4064	23.4902	23.4795	24.2325	23.8658	24.2327	24.3493	23.83	22.2185	23.7249	22.9421
gi|1790042029|gb|QHB87742.1|	gi|1790042029|gb|QHB87742.1|	1790042029	QHB87742.1	30S ribosomal protein S11	Escherichia coli BL21-AI	7	7	7	6	30.8601	44	29	22.4761	22.3044	25.5899	8.65631	25.9418	11.0477	22.2143	0.83404	24.4728	3.9909	17.9037	0.0420313	17.2428	0.0265842	20.2626	0.215599	19.5933	0.135574	22.0031		22.7717	22.6536	22.7374	20.9419	22.5178	23.0206	24.2502	25.033	26.3966	26.6798	26.1402	27.5322	28.1029	26.5786	24.7067	26.5761	25.9876
gi|1790039753|gb|QHB85466.1|	gi|1790039753|gb|QHB85466.1|	1790039753	QHB85466.1	flavodoxin FldA	Escherichia coli BL21-AI	6	6	6	7	28.1869	38	26	21.3055	20.3158	24.4028	8.55826	23.3257	4.05624	19.5875	0.303968	21.6326	1.25447	18.3675	0.130483	17.6758	0.0807881	18.3915	0.132673	17.5346	0.073253				21.3055	20.8469		20.2667	19.8337	23.9461	23.8241	24.9592	24.882	24.5328	24.8641	24.7961	23.8764	23.1012	23.3957	23.3397
gi|1790042030|gb|QHB87743.1|	gi|1790042030|gb|QHB87743.1|	1790042030	QHB87743.1	30S ribosomal protein S13	Escherichia coli BL21-AI	15	15	15	7	31.7164	48	32	23.4546	23.928	26.5511	8.55311	27.0872	12.4027	23.9056	1.36698	24.9048	2.73235	22.4391	0.494658	22.5059	0.5181	22.6094	0.556605	22.7965	0.63371	24.3393	23.5417	22.9579	22.9798	23.7708	23.1711	24.6091	24.161	25.4195	26.276	27.3686	27.1402	27.0453	27.8202	28.5728	27.0793	25.0515	28.0937	27.5866
gi|1790039798|gb|QHB85511.1|	gi|1790039798|gb|QHB85511.1|	1790039798	QHB85511.1	cytochrome ubiquinol oxidase subunit I	Escherichia coli BL21-AI	21	21	21	16	31.0989	44	28	23.824	24.1939	26.9105	8.49427	26.1447	4.99585	23.3878	0.739107	25.1643	2.53207	16.9055	0.00826668	20.1064	0.0760122	17.287	0.0107688	17.7288	0.0146273	23.5226	24.0168	23.9882	23.7683	23.9311	25.0904	23.7674	23.9865	25.9988	27.3118	26.8898	27.4414	27.2903	28.0764	27.6499	27.464	25.916	26.5782	25.8205
gi|1790040794|gb|QHB86507.1|	gi|1790040794|gb|QHB86507.1|	1790040794	QHB86507.1	RNA chaperone ProQ	Escherichia coli BL21-AI	7	7	7	10	26.4986	34	21	17.8263	17.7727	20.9099	8.4773	22.2229	21.0631	16.608	0.429794	19.1523	2.50719	15.0484	0.145809			16.4845	0.394552	15.1646	0.158039		18.9936	17.8917	16.5935	16.5676	18.9777			19.9591	20.4652	21.4281	21.787	22.334	22.7426	24.2051	22.2909	20.8609	23.0912	22.3455
gi|1790042690|gb|QHB88403.1|	gi|1790042690|gb|QHB88403.1|	1790042690	QHB88403.1	argininosuccinate lyase	Escherichia coli BL21-AI	7	7	7	25	25.3491	31	16	18.1026	17.6831	21.1683	8.37268	20.3301	4.68321	16.7608	0.39451	19.6165	2.85568									19.416	16.0036	18.4192	18.5717	18.237	17.9535		16.8588	20.8806	19.885	21.7103	22.1973	22.1022	21.2831	21.8102	20.7291	20.2092	20.3667	20.3753
gi|1790042838|gb|QHB88551.1|	gi|1790042838|gb|QHB88551.1|	1790042838	QHB88551.1	lysine decarboxylase CadA	Escherichia coli BL21-AI	9	9	9	38	24.4841	33	20	16.7179	16.7879	19.7824	8.36583	18.8488	4.37995	15.7175	0.49989	17.1238	1.32498	13.6077	0.115807			12.3835	0.0495704				15.8209		17.6148	19.6105	15.2359	15.5174		19.7241	19.9065	19.329	20.1699	20.1297	20.4043	22.9388	19.2814	17.4144	18.6332	19.1765
gi|1790041924|gb|QHB87637.1|	gi|1790041924|gb|QHB87637.1|	1790041924	QHB87637.1	phosphoglucosamine mutase	Escherichia coli BL21-AI	12	12	12	24	26.1914	28	17	17.2925		20.324	8.17688	20.0595	6.80681			18.3643	2.10205	14.734	0.169754			16.5399	0.59352			17.3672		17.6847	16.8256					20.1099	19.9984	19.8795	21.3084	22.1301	23.6846	23.9169	22.7172	19.6395	20.2189	20.1018
gi|1790042145|gb|QHB87858.1|	gi|1790042145|gb|QHB87858.1|	1790042145	QHB87858.1	Fe-S biogenesis protein NfuA	Escherichia coli BL21-AI	3	3	3	6	27.5449	24	12	20.2339	21.0978	23.2647	8.17257	22.4077	4.51204			21.6802	2.72514										20.1234	20.3444		21.3743			20.8214	22.1452	23.2002	23.9771	23.7362	22.9761	23.836	24.3919	23.1734	21.8257	22.5173	22.6441
gi|1790040319|gb|QHB86032.1|	gi|1790040319|gb|QHB86032.1|	1790040319	QHB86032.1	enoyl-ACP reductase FabI	Escherichia coli BL21-AI	14	14	14	13	30.3463	48	32	22.7743	24.1179	25.8044	8.16876	25.6853	7.52102	23.8867	2.162	24.9986	4.67274	17.2129	0.0211759	16.1553	0.0101737	18.5319	0.0528318	17.7165	0.0300216	21.9129	23.3152	21.7656	24.1036	24.8745	23.7244	24.1831	23.6898	25.4306	25.5626	26.0661	26.1584	26.1348	26.3008	26.4154	26.0693	25.4292	25.8125	25.7092
gi|1790040006|gb|QHB85719.1|	gi|1790040006|gb|QHB85719.1|	1790040006	QHB85719.1	asparagine--tRNA ligase	Escherichia coli BL21-AI	25	25	25	24	28.9235	45	29	21.2884	20.7793	24.3121	8.13203	24.0004	6.552	20.709	0.669216	22.7973	2.84586	16.3437	0.0324711	15.1499	0.0141939	16.312	0.0317651	15.88	0.0235448	21.3098	21.6632	21.0528	21.128	20.5316	21.9397	19.9977	20.6483	23.7591	23.6504	24.6945	25.1442	24.7724	25.2179	25.5384	24.6643	23.5581	24.5439	23.7099
gi|1790040525|gb|QHB86238.1|	gi|1790040525|gb|QHB86238.1|	1790040525	QHB86238.1	bifunctional NADP-dependent 3-hydroxy acid dehydrogenase/3-hydroxypropionate dehydrogenase YdfG	Escherichia coli BL21-AI	9	9	9	10	28.1384	42	27	20.0059	20.0977	23.0287	8.12747	23.3796	10.365	19.6511	0.781952	21.6857	3.20383	17.8876	0.230319	16.7728	0.106352	18.24	0.29403	18.091	0.265195	20.976		20.5542	18.4876	20.2931	20.3081	19.3948	20.3949	23.5124	20.9578	23.7272	23.9174	23.4094	24.4626	25.4784	23.4147	22.7312	23.5015	23.1984
gi|1790039786|gb|QHB85499.1|	gi|1790039786|gb|QHB85499.1|	1790039786	QHB85499.1	citrate (Si)-synthase	Escherichia coli BL21-AI	17	17	17	21	29.5455	48	32	22.0279	21.7281	25.0432	8.08529	24.7753	6.71504	21.5731	0.729607	24.1039	4.21623	18.4302	0.0825983	18.4664	0.084699	19.3297	0.154084	19.5565	0.180318	22.5096	21.9911	21.2259	22.385	22.3432	21.3723	21.5979	21.5991	24.6433	24.4649	25.377	25.6876	25.6242	25.7034	26.048	25.3583	24.4605	24.9916	24.6929
gi|1790041415|gb|QHB87128.1|	gi|1790041415|gb|QHB87128.1|	1790041415	QHB87128.1	50S ribosomal protein L19	Escherichia coli BL21-AI	9	9	9	8	29.9248	47	31	22.0132	21.7335	25.0252	8.06655	25.1144	8.58079	20.4517	0.338798	24.0806	4.19125	16.9168	0.0292291	16.7327	0.0257266	18.6728	0.0987217	17.8084	0.0542269	20.3803	21.7687	22.5956	23.3084	22.1578	21.927	20.4558	22.3935	23.7631	24.9419	25.4105	25.9853	25.1021	25.9085	25.9743	25.3762	24.1863	25.6678	24.9021
gi|1790042508|gb|QHB88221.1|	gi|1790042508|gb|QHB88221.1|	1790042508	QHB88221.1	thioredoxin TrxA	Escherichia coli BL21-AI	3	3	3	7	27.9466	42	27	20.4811	20.8904	23.4877	8.03629	23.1162	6.21194	20.4582	0.98423	22.2368	3.37669	16.6019	0.0679585	16.3773	0.0581582	16.7201	0.0737579			20.6054		20.5551	20.283	21.3658	19.7253	20.9654	21.5051	22.4603	23.4743	23.6424	24.3736	23.7205	24.0086	24.6166	23.6889	22.6605	23.1542	23.321
gi|1790042047|gb|QHB87760.1|	gi|1790042047|gb|QHB87760.1|	1790042047	QHB87760.1	50S ribosomal protein L22	Escherichia coli BL21-AI	12	12	12	5	30.7932	42	26	22.7751	23.9291	25.7676	7.95854	25.98	9.22083	21.5948	0.441234	24.7065	3.81427	18.2828	0.0444286	18.2871	0.044561			17.5891	0.0274697	23.1737	23.3672	21.2214	23.3382	23.8282	24.5962	23.245	24.0471	24.5995	25.5358	26.2177	26.7176	25.9542	27.5173	27.8827	26.4743	24.277	26.8992	26.2166
gi|1790039516|gb|QHB85229.1|	gi|1790039516|gb|QHB85229.1|	1790039516	QHB85229.1	bifunctional diaminohydroxyphosphoribosylaminopyrimidine deaminase/5-amino-6-(5-phosphoribosylamino)uracil reductase RibD	Escherichia coli BL21-AI	3	3	3	22	23.4472	24	12	16.1359	16.7699	19.1207	7.91607	18.1725	4.10286	16.6635	1.4416	17.7074	2.97229									16.1359				17.2089		16.6537	16.4471		17.8531	19.5724	19.9365	19.5379	20.212	20.5584	19.6024	17.4546	19.0142	17.3492
gi|1790042033|gb|QHB87746.1|	gi|1790042033|gb|QHB87746.1|	1790042033	QHB87746.1	50S ribosomal protein L15	Escherichia coli BL21-AI	12	12	12	8	29.6851	45	29	20.6912	21.4439	23.6728	7.89879	24.9698	19.4083	19.7393	0.516968	22.3066	3.06388	16.9934	0.0770627	15.9715	0.0379507	18.076	0.163208	16.3895	0.0507055	21.0698	20.796	19.9621	20.9369	21.0231	21.0645	21.4828	22.2053	22.6022	23.8179	24.129	24.1423	24.8198	25.6313	26.4386	25.0718	22.3294	26.2545	25.3117
gi|1790040742|gb|QHB86455.1|	gi|1790040742|gb|QHB86455.1|	1790040742	QHB86455.1	D-hexose-6-phosphate mutarotase	Escherichia coli BL21-AI	8	8	8	14	27.4332	35	19	19.9912	19.1282	22.9452	7.74908	22.4465	5.48433	19.0404	0.517347	21.3611	2.58446	13.4166	0.0104915			16.4668	0.086907			19.8102	20.7095	18.8329	20.6122	19.4225	18.3322	18.5378	20.2201	22.8774	22.1955	23.1238	23.5842	23.8416	23.7174	23.7868	23.435	22.4044	22.5518	22.0601
gi|1790041675|gb|QHB87388.1|	gi|1790041675|gb|QHB87388.1|	1790041675	QHB87388.1	agmatinase	Escherichia coli BL21-AI	4	4	4	12	25.8035	29	13	18.9294	19.1632	21.8637	7.6435	21.1088	4.52947	18.1369	0.577347	18.7259	0.86843									20.2125	18.2957	18.5899	18.6196	19.9852	19.5242	18.733	18.4104	21.3695	21.4391	21.9382	22.7079	22.0716	22.5049	21.9728	21.0634	21.1382	21.1214	21.0549
gi|1790039799|gb|QHB85512.1|	gi|1790039799|gb|QHB85512.1|	1790039799	QHB85512.1	cytochrome d ubiquinol oxidase subunit II	Escherichia coli BL21-AI	4	4	4	5	29.3872	30	14	22.4305	23.2099	25.3514	7.57319	23.5787	2.21635	21.0827	0.392904	22.8621	1.34874									22.3353	22.7374	21.4776	23.1715	22.9009	24.1156	22.8243	22.9987	24.173	26.1789	24.7596	26.294	25.1268	26.6298	25.7388	25.9339	23.9863	24.5103	22.9739
gi|1790039542|gb|QHB85255.1|	gi|1790039542|gb|QHB85255.1|	1790039542	QHB85255.1	ATP-dependent Clp endopeptidase proteolytic subunit ClpP	Escherichia coli BL21-AI	4	4	4	10	28.5519	36	22	21.3769	21.7853	24.295	7.55852	23.2995	3.79116	21.356	0.98563	21.7157	1.26475	15.8454	0.0216196	15.3799	0.0156577	16.914	0.0453453			20.3877	20.5456	21.4974	23.0768	22.3798		21.1908		23.2268	24.4817	24.8152	24.6562	24.6849	24.9334	24.6823	23.7873	23.5293	23.6736	22.3312
gi|1790040398|gb|QHB86111.1|	gi|1790040398|gb|QHB86111.1|	1790040398	QHB86111.1	D-lactate dehydrogenase	Escherichia coli BL21-AI	8	8	8	15	25.9491	30	15	18.641	18.3128	21.5466	7.49307	21.3826	6.68818	17.8908	0.594516	19.5119	1.82882									18.9614	17.572		19.3896	19.1014	19.2454	17.2406	17.6637	21.1979	20.9978	21.6794	22.3111	22.0356	22.2908	22.7068	21.8604	20.4264	22.0566	21.1303
gi|1790041378|gb|QHB87091.1|	gi|1790041378|gb|QHB87091.1|	1790041378	QHB87091.1	pyridoxine 5-phosphate synthase	Escherichia coli BL21-AI	4	4	4	13	25.0102	25	13	16.2141	16.6772	19.1089	7.43743	18.7106	5.64298			17.9885	3.4209							16.2005	0.990627				16.2141	17.3072		16.4685	16.2558	20.3154	17.9452	18.9176	19.2575	21.0822	21.6397	22.4119	20.7553	17.542	19.107	18.7855
gi|1790039541|gb|QHB85254.1|	gi|1790039541|gb|QHB85254.1|	1790039541	QHB85254.1	trigger factor	Escherichia coli BL21-AI	34	34	34	26	29.3221	48	32	21.3226	20.4968	24.2103	7.40093	24.1293	6.99696	20.6199	0.61445	23.2793	3.8819	19.6486	0.313387	19.5758	0.297963	19.4428	0.27173	19.6923	0.323034	21.3677	20.5395	21.7021	21.681	21.0716	20.5883	20.1968	20.1304	24.1769	23.5797	24.2136	24.871	24.6975	25.509	26.3878	24.6577	24.0465	24.3296	23.8079
gi|1790042473|gb|QHB88186.1|	gi|1790042473|gb|QHB88186.1|	1790042473	QHB88186.1	F0F1 ATP synthase subunit alpha	Escherichia coli BL21-AI	31	31	31	28	30.0066	48	32	21.0755	20.6578	23.9555	7.36126	24.4003	10.0196	20.064	0.496012	22.597	2.87081	17.4527	0.0811724	17.3144	0.0737552	19.5546	0.348451	18.426	0.159375	20.594	21.079	21.4649	21.1642	20.8976	20.9337	20.2633	20.5367	23.5711	23.1316	24.5638	24.5554	26.1683	27.1834	27.7334	26.1357	22.7595	24.8544	24.6894
gi|1790039855|gb|QHB85568.1|	gi|1790039855|gb|QHB85568.1|	1790039855	QHB85568.1	DNA-binding protein YbiB	Escherichia coli BL21-AI	5	5	5	18	25.2101	21	10	17.7624		20.6311	7.30396	20.3742	6.11244			18.9827	2.32986									17.9826		17.6125	17.6921					20.6077	19.4551	20.5685	21.8932	21.9014	21.5262	21.5421	21.1659	20.7372	20.29	19.8894
gi|1790039665|gb|QHB85378.1|	gi|1790039665|gb|QHB85378.1|	1790039665	QHB85378.1	oxygen-insensitive NAD(P)H nitroreductase	Escherichia coli BL21-AI	8	8	8	12	27.8468	35	19	20.6968	20.3584	23.5646	7.29945	23.2495	5.86742	20.2112	0.714209	22.3828	3.21774	15.7632	0.0327215							20.1661	21.3579	19.9461	21.3172	21.2579	20.27	19.9897	19.916	22.9262	23.1888	23.831	24.3124	23.6685	23.7872	24.0029	23.4603	22.5054	23.5225	23.3149
gi|1790041278|gb|QHB86991.1|	gi|1790041278|gb|QHB86991.1|	1790041278	QHB86991.1	transaldolase A	Escherichia coli BL21-AI	7	7	7	23	24.7605	25	15	16.9038	16.7735	19.7714	7.29818	19.6038	6.49779	17.2174	1.24278	18.7079	3.49207											16.9038			16.7735			19.8702	17.7481	20.9797	20.4876	20.389	21.0996	21.5852	21.2142	20.0862	19.0186	19.8645
gi|1790041630|gb|QHB87343.1|	gi|1790041630|gb|QHB87343.1|	1790041630	QHB87343.1	lysine--tRNA ligase	Escherichia coli BL21-AI	36	21	21	29	28.4935	36	21	18.6084	18.0297	21.4678	7.25701	22.3199	13.0995			19.2709	1.58284			14.6986	0.0665309	18.2706	0.791214	15.2361	0.0965644	19.4661	17.0782		19.281	17.1778	17.0693	18.7503	19.1215	20.604	19.9039	22.8582	22.505	24.5479	25.6856	25.7339	24.2401	20.7136	22.4521	22.4661
gi|1790043030|gb|QHB88743.1|	gi|1790043030|gb|QHB88743.1|	1790043030	QHB88743.1	GTPase	Escherichia coli BL21-AI	2	2	2	16	22.5852	7	3	15.7485		18.6028	7.23145																15.7485								18.7337	18.1506	18.924		18.5962	20.6121	18.1715
gi|1790042937|gb|QHB88650.1|	gi|1790042937|gb|QHB88650.1|	1790042937	QHB88650.1	metalloprotease PmbA	Escherichia coli BL21-AI	9	9	9	26	24.8392	29	19	17.2355		20.0887	7.22598	19.7145	5.57509			17.6278	1.31251					14.3214	0.132672	14.5506	0.155513	16.5075			17.9635					19.6396	19.713	20.0262	20.9758	20.5467	21.788	21.4953	20.2617	19.1785	20.4982	18.7815
gi|1790042353|gb|QHB88066.1|	gi|1790042353|gb|QHB88066.1|	1790042353	QHB88066.1	glycine C-acetyltransferase	Escherichia coli BL21-AI	21	21	21	17	29.656	48	32	22.1673	21.3794	24.9951	7.09978	24.6748	5.68645	21.3835	0.580838	23.5353	2.58109	16.5498	0.0203686	16.533	0.0201327	18.284	0.0677632	17.0367	0.0285459	21.8257	21.7304	22.3679	22.7452	21.3804	21.4004	21.5843	21.1525	24.1634	24.4849	25.4371	25.895	25.3959	26.2255	26.5212	25.2879	23.9868	25.0765	24.7165
gi|1790042603|gb|QHB88316.1|	gi|1790042603|gb|QHB88316.1|	1790042603	QHB88316.1	glutamate--ammonia ligase	Escherichia coli BL21-AI	13	13	13	23	26.4114	40	24	19.4561	19.7506	22.2808	7.08461	21.7788	5.0027	19.0584	0.759069	20.4407	1.97878	15.0197	0.0461854	16.1063	0.0980874	18.3167	0.453941	14.6264	0.0351657	18.5921	20.0996	18.9204	20.2123	21.1526	19.2662	19.1	19.4835	22.0598	22.4222	21.9648	22.6764	22.3571	22.7984	21.7833	21.7543	21.8826	22.43	21.438
gi|1790042472|gb|QHB88185.1|	gi|1790042472|gb|QHB88185.1|	1790042472	QHB88185.1	F0F1 ATP synthase subunit gamma	Escherichia coli BL21-AI	15	15	15	17	28.1329	43	29	19.8428	19.1054	22.6512	7.00496	22.9865	8.83764	17.3722	0.180413	19.8854	1.02991	18.8205	0.492332	16.5167	0.0997061	13.8777	0.0160071	16.1819	0.0790567	20.5851	20.9391		18.0044	16.4685	20.8796		19.9679	21.8942	21.9214	23.3824	23.4068	24.2614	24.7697	25.7033	23.7051	19.8953	24.1037	23.523
gi|1790039461|gb|QHB85174.1|	gi|1790039461|gb|QHB85174.1|	1790039461	QHB85174.1	substrate-binding domain-containing protein	Escherichia coli BL21-AI	17	17	17	17	29.0282	46	30	21.5269	20.4642	24.3294	6.97657	23.9929	5.52517	20.4986	0.490306	23.1337	3.0459	15.2793	0.0131613	16.4215	0.0290483	16.7029	0.0353064	15.0569	0.0112807	19.364	21.9402	21.9507	22.8526	19.1528	19.4128	20.7584	22.5326	23.3406	24.0287	24.7512	25.1971	24.6956	25.5302	25.6728	24.6041	23.5087	24.6111	23.3834
gi|1790041555|gb|QHB87268.1|	gi|1790041555|gb|QHB87268.1|	1790041555	QHB87268.1	nucleotide 5-monophosphate nucleosidase	Escherichia coli BL21-AI	8	8	8	24	24.9951	23	12	16.4592	17.1593	19.2562	6.94973	19.6154	8.91439			17.5088	2.06988									15.6204			17.2981				17.1593	19.8115	17.4001	19.8571	19.9562	20.7244	21.7369	22.3211	21.5154	18.7334	19.4675	20.5398
gi|1790042164|gb|QHB87877.1|	gi|1790042164|gb|QHB87877.1|	1790042164	QHB87877.1	aspartate-semialdehyde dehydrogenase	Escherichia coli BL21-AI	6	6	6	14	25.7262	29	17	17.7732	20.0954	20.5616	6.90862	21.1636	10.4863			19.4662	3.23333	15.2752	0.177025	14.3567	0.093652					17.7732				20.9379		17.6682	21.68	19.9908	20.5594	19.8244	21.8718	21.9417	22.2919	22.0424	21.2551	20.1138	21.0413	22.0573
gi|1790039929|gb|QHB85642.1|	gi|1790039929|gb|QHB85642.1|	1790039929	QHB85642.1	nitroreductase NfsA	Escherichia coli BL21-AI	7	7	7	12	26.6278	28	15	19.634	19.0637	22.4128	6.86284	22.0064	5.1781	18.9139	0.607058	20.8826	2.37609									20.9429		18.4586	19.5006	19.2291			18.8983	22.2676	21.9452	22.4466	22.9919	23.3131	21.6496	23.0485	21.8673	21.8243	21.9593	22.3057
gi|1790042072|gb|QHB87785.1|	gi|1790042072|gb|QHB87785.1|	1790042072	QHB87785.1	elongation factor G	Escherichia coli BL21-AI	47	47	47	35	30.0515	48	32	22.8354	22.6122	25.6067	6.82739	25.1341	4.92016	21.9565	0.543795	24.3617	2.88053	20.5067	0.199059	21.0026	0.280722	20.9663	0.273746	20.7187	0.230579	23.1107	22.6472	22.8813	22.7024	22.8699	23.044	21.9876	22.5474	25.2179	24.9216	25.9	26.3875	25.7972	26.3427	26.5021	25.5303	24.8856	25.5721	24.5432
gi|1790042374|gb|QHB88087.1|	gi|1790042374|gb|QHB88087.1|	1790042374	QHB88087.1	YicC family protein	Escherichia coli BL21-AI	6	6	6	19	24.8322	26	14	17.2012	16.8766	19.9697	6.81425	20.1578	7.7629	16.3634	0.559489	18.6476	2.72529									17.4956		16.9068		16.4207	17.3325			20.1192	18.5477	20.1786	21.0334	20.9845	20.7808	21.2978	20.2128	19.796	20.3847	20.4899
gi|1790039628|gb|QHB85341.1|	gi|1790039628|gb|QHB85341.1|	1790039628	QHB85341.1	bifunctional methylenetetrahydrofolate dehydrogenase/methenyltetrahydrofolate cyclohydrolase FolD	Escherichia coli BL21-AI	4	4	4	11	24.957	26	13	17.8735	18.7947	20.6391	6.80032	19.6468	3.41836	17.7014	0.887571	18.6482	1.71085									18.1568	18.1893	17.128	18.02	18.7947				20.4411	20.0068	21.1384	20.9701	20.1909	20.4791	22.444	20.8803	17.912	20.6922	19.6292
gi|1790039743|gb|QHB85456.1|	gi|1790039743|gb|QHB85456.1|	1790039743	QHB85456.1	asparagine synthase B	Escherichia coli BL21-AI	4	4	4	31	21.3464	6	2	15.173	14.5582	17.9246	6.7344																		15.173		14.5582					17.6994	18.1497		19.0182	19.882
gi|1790039979|gb|QHB85692.1|	gi|1790039979|gb|QHB85692.1|	1790039979	QHB85692.1	formate C-acetyltransferase	Escherichia coli BL21-AI	41	41	36	42	29.1292	48	32	21.533	21.6351	24.2833	6.72879	24.1106	5.96957	21.3582	0.885874	22.6632	2.18893	17.3262	0.0541556	17.1882	0.0492149	19.1481	0.191458	18.3345	0.10893	22.3764	20.9286	20.8528	21.9742	22.2773	20.9589	21.7475	21.5566	23.754	23.8291	24.5336	25.0167	24.6045	25.2535	27.0439	24.3521	23.4134	24.5665	23.8274
gi|1790042706|gb|QHB88419.1|	gi|1790042706|gb|QHB88419.1|	1790042706	QHB88419.1	DNA-directed RNA polymerase subunit beta	Escherichia coli BL21-AI	87	87	87	70	29.1303	48	32	19.9443	19.4864	22.6826	6.67279	23.644	12.9939	20.5067	1.47678	21.0888	2.21072	16.9629	0.126621	15.1204	0.0353082	18.079	0.274467	16.9171	0.122668	23.2696	16.4929	17.1503	22.8644	20.2221	18.4901	21.5336	17.6999	22.9633	21.1804	23.1733	23.4133	24.4709	25.3005	27.3682	24.6007	22.2472	24.4338	22.999
gi|1790041147|gb|QHB86860.1|	gi|1790041147|gb|QHB86860.1|	1790041147	QHB86860.1	YfbU family protein	Escherichia coli BL21-AI	10	10	10	11	28.052	32	16	21.0492	20.9654	23.7775	6.62671	23.1564	4.3084	20.1455	0.534501	22.3496	2.46293									21.7092	19.8917	21.55	21.0459	21.5537	20.8171	20.2156	21.2753	23.2339	23.2052	24.2714	24.3994	24.3275	24.1189	24.3684	23.6751	22.9773	23.2575	23.0397
gi|1790040814|gb|QHB86527.1|	gi|1790040814|gb|QHB86527.1|	1790040814	QHB86527.1	glucose-6-phosphate dehydrogenase	Escherichia coli BL21-AI	20	20	20	31	26.8755	31	19	18.516	17.8684	21.225	6.53868	21.2887	6.83411	16.2214	0.203822	18.8488	1.25944					15.7237	0.144353	15.2489	0.103876	19.9984			17.0336	17.6522	18.0846			20.8261	19.5879	22.2013	22.2846	23.3892	24.4207	24.7659	23.1364	21.0459	21.5195	21.1945
gi|1790041972|gb|QHB87685.1|	gi|1790041972|gb|QHB87685.1|	1790041972	QHB87685.1	50S ribosomal protein L13	Escherichia coli BL21-AI	18	18	18	8	30.5526	42	26	22.4442	22.6109	25.1383	6.47126	25.2913	7.19561	21.5943	0.554833	23.9032	2.74921	14.4259	0.00385701	13.9953	0.00286168	18.5669	0.0680462	17.1893	0.0261885	21.8256	22.93	21.9639	23.0574	23.3958	21.5067	23.5382	22.0028	23.9267	24.8193	26.1175	25.6896	26.2512	27.1538	27.4785	26.3281	23.2799	26.0931	25.9746
gi|1790043071|gb|QHB88784.1|	gi|1790043071|gb|QHB88784.1|	1790043071	QHB88784.1	purine-nucleoside phosphorylase	Escherichia coli BL21-AI	12	12	12	16	28.0629	45	29	20.7489	19.9753	23.4421	6.46744	22.9423	4.5741	20.5591	0.876772	22.6107	3.63463	16.3771	0.0483036	16.0714	0.0390795	17.0849	0.078891	17.5784	0.111071	20.7892	19.6606	20.8	21.7456	21.2141	21.125	20.0734	17.4885	23.2026	22.5896	23.5336	24.4424	23.9242	24.3015	25.5684	22.9911	22.2209	22.9248	23.3531
gi|1790043014|gb|QHB88727.1|	gi|1790043014|gb|QHB88727.1|	1790043014	QHB88727.1	beta-aspartyl-peptidase	Escherichia coli BL21-AI	3	3	3	21	26.8317	31	16	20.1152	20.1274	22.8029	6.44252	21.7757	3.1612	19.5877	0.693745	21.3088	2.28709									19.9872	20.1035		20.255	20.6984	20.2285	19.4366	20.1463	22.0499	22.7981	23.2196	23.1438	22.1833	22.6835	23.4167	18.8349	21.423	22.372	21.1567
gi|1790039793|gb|QHB85506.1|	gi|1790039793|gb|QHB85506.1|	1790039793	QHB85506.1	ADP-forming succinate--CoA ligase subunit beta	Escherichia coli BL21-AI	25	25	25	24	30.1007	44	28	22.5042	22.4289	25.1906	6.43697	25.1733	6.36024	22.1015	0.756454	23.7663	2.39846	16.9393	0.0211251	14.8918	0.00511046	17.5824	0.0329921	16.4247	0.0147871	21.4744	22.9187	22.5682	23.0554	22.3851	22.7736	22.1508	22.4062	24.5349	24.793	25.6744	25.76	25.8706	26.3607	27.5874	25.7096	24.035	25.5668	25.3267
gi|1790039444|gb|QHB85157.1|	gi|1790039444|gb|QHB85157.1|	1790039444	QHB85157.1	NADPH-dependent aldehyde reductase YahK	Escherichia coli BL21-AI	4	4	4	17	24.3877	26	15	16.9273	16.902	19.6126	6.43216	19.568	6.23602	19.7215	6.93613	17.9163	1.98474									16.6963			17.1584	16.902				19.8621	18.5742	19.8596	20.1546	20.1381	19.0452	21.3164	20.3985	19.3895	18.7957	20.314
gi|1790041133|gb|QHB86846.1|	gi|1790041133|gb|QHB86846.1|	1790041133	QHB86846.1	NADH-quinone oxidoreductase subunit J	Escherichia coli BL21-AI	1	1	1	2	26.0654	20	9	19.9951	20.7124	22.677	6.41727	20.5325	1.45134			20.1939	1.14775												19.9951	20.912		20.5491	20.676	22.0346	22.6883	22.7281	23.2571	20.1823	22.2	22.3199	22.0569		20.3733	19.5653
gi|1790041294|gb|QHB87007.1|	gi|1790041294|gb|QHB87007.1|	1790041294	QHB87007.1	thioredoxin-dependent thiol peroxidase	Escherichia coli BL21-AI	4	4	4	11	26.9224	28	16	19.9839	19.3865	22.6628	6.40386	21.5899	3.04414	18.1481	0.280135	20.7136	1.65837			12.3085	0.00489187						19.8641		20.1037		20.2245	18.5485		21.8019	22.597	22.8042	23.4481	22.9675	23.7392	23.39	22.965	20.6308	22.1504	21.551
gi|1790043061|gb|QHB88774.1|	gi|1790043061|gb|QHB88774.1|	1790043061	QHB88774.1	peptide chain release factor 3	Escherichia coli BL21-AI	3	3	3	26	21.725	14	6	14.1648		16.8314	6.34916	17.1519	7.92851																14.1648					17.7558	15.9429	16.7955		17.8603	18.5438	19.2598		15.7056	17.5938	18.1563
gi|1790042352|gb|QHB88065.1|	gi|1790042352|gb|QHB88065.1|	1790042352	QHB88065.1	L-threonine 3-dehydrogenase	Escherichia coli BL21-AI	8	8	8	13	28.6479	48	32	21.6001	20.0387	24.2608	6.32358	23.4501	3.60504	20.6129	0.504449	23.0399	2.71276	18.5892	0.12406	18.2319	0.096845	19.7152	0.270772	18.2638	0.0990123	21.4036	21.1854	21.9416	21.8698	20.933	20.1962	20.3391	18.6866	24.0348	23.6361	24.442	24.9304	24.8187	24.9192	25.1989	24.3417	23.5793	23.4298	23.3713
gi|1790039579|gb|QHB85292.1|	gi|1790039579|gb|QHB85292.1|	1790039579	QHB85292.1	adenylate kinase	Escherichia coli BL21-AI	14	14	14	15	28.2179	44	28	21.1196	20.8515	23.7396	6.14778	23.2683	4.43444	20.2957	0.564932	22.6399	2.86852	15.7892	0.0248549	18.0686	0.120659	17.8236	0.101816	17.5516	0.0843215	21.4098	20.8541	20.9657	21.2486	21.9133	20.8455	20.251	20.3962	23.5174	23.1474	23.8713	24.4225	24.1755	24.0681	24.3627	24.0193	22.5198	23.6296	23.3418
gi|1790042748|gb|QHB88461.1|	gi|1790042748|gb|QHB88461.1|	1790042748	QHB88461.1	maltose/maltodextrin ABC transporter substrate-binding protein MalE	Escherichia coli BL21-AI	21	21	21	24	28.748	34	18	21.984	21.4798	24.6005	6.13233	24.0298	4.12884	21.405	0.669429	23.2875	2.46827					15.898	0.01472			21.2824	21.4366	21.9808	23.2363	22.4641	21.5338	20.5623	21.3591	24.3401	24.3079	24.7634	24.9904	24.2997	23.9274	24.4223	24.282	23.8014	24.0537	23.9952
gi|1790039287|gb|QHB85000.1|	gi|1790039287|gb|QHB85000.1|	1790039287	QHB85000.1	bifunctional aconitate hydratase 2/2-methylisocitrate dehydratase	Escherichia coli BL21-AI	51	51	51	52	29.4739	48	32	21.7042	20.9256	24.3128	6.09939	24.2138	5.69467	20.8296	0.545414	22.5951	1.85434	18.5393	0.111501	18.4194	0.102609	18.9815	0.15149	19.1803	0.173878	21.556	21.5079	21.7215	22.0313	21.6235	21.3445	20.3737	20.3608	23.8942	23.5797	24.7054	25.0721	25.3377	26.3328	27.3646	25.1043	24.1809	24.2624	23.9967
gi|1790040816|gb|QHB86529.1|	gi|1790040816|gb|QHB86529.1|	1790040816	QHB86529.1	pyruvate kinase II	Escherichia coli BL21-AI	18	18	18	25	27.1914	38	22	20.2176	19.7668	22.8255	6.09608	22.4347	4.64961	19.083	0.45546	20.9781	1.69403			13.4919	0.00944818	14.2271	0.015728			19.1614	20.4688	20.0376	21.2026	20.3518	18.9534	19.1844	20.5778	22.7452	22.2954	23.0979	23.1636	23.5237	23.6167	23.8038	22.8321	22.2601	22.7106	22.2941
gi|1790042827|gb|QHB88540.1|	gi|1790042827|gb|QHB88540.1|	1790042827	QHB88540.1	alpha-galactosidase	Escherichia coli BL21-AI	18	18	18	18	30.0907	42	26	22.0478	21.8151	24.6523	6.08198	24.8749	7.09666	21.1999	0.555621	24.1863	4.40325	17.5449	0.0441064	17.7586	0.0511485	16.8128	0.0265542			21.936	22.1157	21.8049	22.3345	22.2378	22.0392	21.4971	21.4861	23.9196	24.0313	25.2534	25.405	25.8418	27.0972	27.4265	25.8127	24.4626	25.6915	24.1384
gi|1790041344|gb|QHB87057.1|	gi|1790041344|gb|QHB87057.1|	1790041344	QHB87057.1	Fe-S cluster assembly scaffold IscU	Escherichia coli BL21-AI	1	1	1	8	23.591	25	14	17.4288	18.2534	20.0251	6.04733	18.5701	2.2058	17.9256	1.41109	18.603	2.25668									17.8246	17.0329				17.4543		19.0525	19.2916	20.4102	19.7668	20.6317	17.8612	19.2941	18.6211	18.8761	16.9786	19.0416	19.407
gi|1790041230|gb|QHB86943.1|	gi|1790041230|gb|QHB86943.1|	1790041230	QHB86943.1	glutamate--tRNA ligase	Escherichia coli BL21-AI	11	11	11	24	26.3098	33	20	19.0369	17.6773	21.6224	6.0019	21.6777	6.23667	16.9502	0.23541	20.265	2.34257					15.3765	0.079088	15.4501	0.0832233	18.9698		18.4336	19.7074	18.7251	16.6294			21.077	20.9009	22.0564	22.4552	22.3001	22.7977	22.9435	21.8375	20.8984	21.9484	22.1597
gi|1790042050|gb|QHB87763.1|	gi|1790042050|gb|QHB87763.1|	1790042050	QHB87763.1	50S ribosomal protein L23	Escherichia coli BL21-AI	4	4	4	5	27.8037	41	26	19.8812	19.3072	22.4585	5.96843	22.6115	6.6362	18.1913	0.309954	21.1302	2.37684	19.7559	0.916862	18.7257	0.448918	19.1942	0.621164	20.7298	1.80082	21.1131	19.9673	18.5631		19.7691	19.4935	19.7227	18.2437	22.4447	21.3475	23.3664	22.6754	22.5046	24.448	24.7384	22.2211	21.1804	22.9654	22.1713
tr|U2Q8X2|U2Q8X2_EUBRA	tr|U2Q8X2|U2Q8X2_EUBRA	U2Q8X2	U2Q8X2_EUBRA	Chalcone_N domain-containing protein	Eubacterium ramulus ATCC 29099	26	26	26	13	35.6507	48	32	28.8274	28.6949	31.3789	5.86241	31.0174	4.56305	28.208	0.65094	29.8831	2.07878	22.7521	0.0148308	22.8402	0.0157646	24.2421	0.0416573	23.3521	0.0224783	28.6972	28.5818	28.9414	29.0891	28.8933	28.7019	28.433	28.7515	30.6632	30.7867	32.0784	31.9873	31.2542	30.9995	32.1156	31.0988	30.6196	31.0174	31.285
gi|1790041761|gb|QHB87474.1|	gi|1790041761|gb|QHB87474.1|	1790041761	QHB87474.1	L-glyceraldehyde 3-phosphate reductase	Escherichia coli BL21-AI	2	2	2	20	23.0564	20	10	16.1033	16.8848	18.6493	5.84035	18.4466	5.07479	16.1793	1.05412													16.1033		17.1211			16.6485	18.3068	18.4072	18.9347	18.9485	19.4281	19.3629	19.0666	19.2072	17.5273	19.5346	17.9438
gi|1790039606|gb|QHB85319.1|	gi|1790039606|gb|QHB85319.1|	1790039606	QHB85319.1	HTH-type transcriptional repressor AllR	Escherichia coli BL21-AI	3	3	3	12	22.9849	15	7	16.3323		18.8604	5.76807	18.5902	4.78275																16.3323					18.5512	18.9663	19.0638		18.8437	19.1905	19.7181		17.3873	19.3139	18.5173
gi|1790039624|gb|QHB85337.1|	gi|1790039624|gb|QHB85337.1|	1790039624	QHB85337.1	peptidylprolyl isomerase B	Escherichia coli BL21-AI	7	7	7	8	28.3791	45	29	21.7554	21.5632	24.2715	5.72018	23.4298	3.19189	20.7743	0.506592	22.4559	1.62512	18.3558	0.0947608	17.4876	0.0519127	17.7388	0.0617854	16.8386	0.033106	21.8686	21.2103	20.9086	23.0341	22.5733	19.8513	21.7762	22.0519	23.4821	24.038	24.4585	25.1073	23.8435	23.5946	24.3995	24.3454	22.2246	24.0785	23.2628
gi|1790042592|gb|QHB88305.1|	gi|1790042592|gb|QHB88305.1|	1790042592	QHB88305.1	thiol:disulfide interchange protein DsbA	Escherichia coli BL21-AI	1	1	1	11	23.308	19	9	17.4835	17.1283	19.997	5.71009			17.2419	0.845811	18.3454	1.8174									17.449		17.1212	17.8803	18.05	16.381		16.9539	19.286	19.7711	20.7014	20.2296	18.8915	19.3318	19.6204	19.6292
gi|1790041539|gb|QHB87252.1|	gi|1790041539|gb|QHB87252.1|	1790041539	QHB87252.1	phosphopyruvate hydratase	Escherichia coli BL21-AI	33	33	33	18	32.0808	48	32	25.1375	24.9593	27.6379	5.65879	26.8278	3.22734	24.7269	0.752321	25.8829	1.67647	20.5235	0.0408364	20.0774	0.0299753	21.423	0.0761781	20.4695	0.0393376	25.4279	24.9941	24.6183	25.5095	25.1001	24.876	24.8128	25.0484	27.2848	26.9576	28.0938	28.2156	27.5997	28.1197	29.4347	27.1072	26.1954	26.9313	27.124
gi|1790039347|gb|QHB85060.1|	gi|1790039347|gb|QHB85060.1|	1790039347	QHB85060.1	acyl-ACP--UDP-N-acetylglucosamine O-acyltransferase	Escherichia coli BL21-AI	4	4	4	9	25.5855	40	27	19.2874	19.0093	21.7828	5.63888	19.837	1.46374	18.4656	0.56573	18.4408	0.556094	15.6008	0.0776671	15.5152	0.0731908	16.7375	0.170772	15.9022	0.0957124	19.1425	18.8271	19.7897	19.3902		19.0093			21.4204	20.9368	21.9232	22.8507	20.8277	21.342	22.571	20.5082	17.9135	20.744	20.0385
gi|1790041933|gb|QHB87646.1|	gi|1790041933|gb|QHB87646.1|	1790041933	QHB87646.1	50S ribosomal protein L27	Escherichia coli BL21-AI	4	4	4	4	28.4211	43	28	21.0062	21.2866	23.4984	5.6264	23.0795	4.2085	20.9852	0.985572	22.0116	2.00761	17.4052	0.0824136	17.5537	0.0913511	18.7337	0.206984	18.6461	0.194781	21.2073	20.8654	21.0501	20.9018		21.034	21.5667	21.2592	22.7498	22.9378	23.957	24.3489	23.2312	24.6152	26.3496	23.7784	21.1774	24.0579	23.2073
gi|1790041645|gb|QHB87358.1|	gi|1790041645|gb|QHB87358.1|	1790041645	QHB87358.1	glycine cleavage system aminomethyltransferase GcvT	Escherichia coli BL21-AI	11	11	11	16	27.9392	43	27	21.0883	20.4029	23.5638	5.56146	23.2581	4.49959	20.0764	0.495883	21.8815	1.73294	15.6354	0.0228299	16.7633	0.049892	19.5587	0.346377	17.2736	0.0710665	21.6744	20.2955	21.1205	21.263	21.9289	20.8096	18.1147	20.7583	23.2674	23.143	23.7266	24.1181	23.9584	24.0861	23.9076	23.4668	23.063	23.1944	23.4573
gi|1790039259|gb|QHB84972.1|	gi|1790039259|gb|QHB84972.1|	1790039259	QHB84972.1	phospho-N-acetylmuramoyl-pentapeptide-transferase	Escherichia coli BL21-AI	1	1	1	11	23.9054	19	10	18.0578		20.5303	5.54993	19.3386	2.42971			19.5563	2.82557									17.9926	18.1229								20.7833	20.2308	20.5766		19.9989	19.6258	18.7713	18.8726	19.9202	19.0538
gi|1790041149|gb|QHB86862.1|	gi|1790041149|gb|QHB86862.1|	1790041149	QHB86862.1	acetate kinase	Escherichia coli BL21-AI	11	11	11	19	28.1054	43	27	20.6765	20.206	23.1451	5.53516	22.9012	4.67427	20.3568	0.801236	21.5783	1.86836	15.8808	0.036005	13.3886	0.00639935	17.1927	0.0893858	16.7526	0.0658836	20.6696	21.0424	19.6784	21.3156	21.2382	20.03	18.966	20.5898	22.7154	22.525	23.5967	23.7433	23.8861	24.6237	26.0383	23.6374	22.109	23.2538	22.7438
gi|1790039794|gb|QHB85507.1|	gi|1790039794|gb|QHB85507.1|	1790039794	QHB85507.1	succinate--CoA ligase subunit alpha	Escherichia coli BL21-AI	16	16	16	16	29.9636	48	32	22.8096	22.4677	25.2773	5.53182	24.8024	3.98029	22.0892	0.606925	23.4555	1.56475	16.4697	0.0123459	16.4749	0.0123899	17.8803	0.03282	16.9226	0.0168984	22.4122	22.8795	22.4985	23.448	22.5642	22.5548	22.1768	22.575	24.5631	24.8056	25.7475	25.9931	25.7502	26.4088	27.5662	25.5364	23.421	25.3404	25.133
gi|1790042088|gb|QHB87801.1|	gi|1790042088|gb|QHB87801.1|	1790042088	QHB87801.1	OsmC family protein	Escherichia coli BL21-AI	2	2	2	7	25.4621	33	17	18.8211	21.0651	21.2867	5.52371	20.3162	2.81881	19.8675	2.06535	20.1971	2.59558					16.4072	0.187649	16.6568	0.223097	20.3259	15.7272	19.8967	19.3345	21.7651	20.4531	21.0592	20.983	21.5864		20.6897	21.584	21.2042	20.8764	21.1032	20.9418	20.4523	20.3659	20.4097
gi|1790043070|gb|QHB88783.1|	gi|1790043070|gb|QHB88783.1|	1790043070	QHB88783.1	phosphopentomutase	Escherichia coli BL21-AI	13	13	13	20	27.7005	34	18	20.9435	20.5362	23.4083	5.52052	22.9674	4.06673	20.3202	0.649157	21.5786	1.55301							16.1024	0.0348894	21.2471	20.6192	21.1274	20.7804	20.5196	21.2758	19.6037	20.7457	22.9281	22.9524	23.65	24.1027	23.694	23.658	24.2232	23.3348	21.7736	23.2648	23.3257
gi|1790041365|gb|QHB87078.1|	gi|1790041365|gb|QHB87078.1|	1790041365	QHB87078.1	aminotransferase class I/II-fold pyridoxal phosphate-dependent enzyme	Escherichia coli BL21-AI	25	25	25	21	29.9014	48	32	23.1038	22.9505	25.5636	5.50129	24.9422	3.57597	22.5259	0.669916	24.0925	1.98431	18.237	0.0342722	17.956	0.0282062	18.768	0.0495199	18.3733	0.0376686	23.0486	22.8583	22.8442	23.6643	23.498	22.9761	22.3224	23.0055	24.9696	25.1892	25.755	26.3407	25.5397	26.2326	26.3207	25.5585	24.6533	25.2816	24.8323
gi|1790042849|gb|QHB88562.1|	gi|1790042849|gb|QHB88562.1|	1790042849	QHB88562.1	chaperonin GroEL	Escherichia coli BL21-AI	55	55	55	31	32.3047	48	32	24.7607	24.4387	27.2158	5.48366	27.3654	6.08285	24.5761	0.879908	26.0843	2.503	22.5195	0.211518	21.9493	0.142456	23.1683	0.331625	22.8631	0.268405	24.8469	24.6099	24.6487	24.9372	24.7428	24.2939	24.2438	24.4744	27.0357	26.5154	27.5274	27.7848	28.0894	28.7967	29.4933	28.0857	26.5863	27.8182	27.1248
gi|1790039813|gb|QHB85526.1|	gi|1790039813|gb|QHB85526.1|	1790039813	QHB85526.1	3-deoxy-7-phosphoheptulonate synthase AroG	Escherichia coli BL21-AI	12	12	11	17	26.4154	20	11	18.2836		20.735	5.46931	19.6066	2.50189									17.1403	0.452711	15.331	0.129172			18.2836						20.6051	19.2761	21.7324	21.3261	21.0316	22.595	25.7218	21.4152		20.0738	17.9714
gi|1790039236|gb|QHB84949.1|	gi|1790039236|gb|QHB84949.1|	1790039236	QHB84949.1	L-arabinose isomerase	Escherichia coli BL21-AI	22	22	22	22	28.6411	43	27	21.7008	20.5202	24.1397	5.42213	23.9176	4.64845	20.2511	0.366087	22.7909	2.12884	16.0129	0.0193982	16.1297	0.0210347	17.2544	0.045865	17.4794	0.0536093	21.4228	21.3361	21.7425	22.3018	21.1871	20.8164	19.7037	20.3738	23.7443	23.1399	24.6534	25.0212	24.7969	24.982	25.2686	24.5967	23.819	24.242	23.6405
gi|1790040078|gb|QHB85791.1|	gi|1790040078|gb|QHB85791.1|	1790040078	QHB85791.1	NAD(P)H:quinone oxidoreductase	Escherichia coli BL21-AI	12	12	12	10	28.0815	44	29	19.8024	20.2326	22.2398	5.4168	22.486	6.42488	18.4717	0.397583	21.4717	3.18073	16.3607	0.092036	15.8345	0.0639099	18.2782	0.347674	17.0593	0.149369	19.7004	17.641	20.3474	21.5206	22.1363		19.0039	19.5577	22.4671	20.0475	22.985	23.4596	23.8192	23.5045	23.7269	23.5512	21.7632	22.6516	22.4825
gi|1790041875|gb|QHB87588.1|	gi|1790041875|gb|QHB87588.1|	1790041875	QHB87588.1	2-hydroxy-3-oxopropionate reductase	Escherichia coli BL21-AI	12	12	12	16	28.4678	43	27	21.3731	20.014	23.8067	5.4025	23.4767	4.29773	19.973	0.378904	22.0109	1.55594	16.5928	0.036391	18.5135	0.137781	20.1946	0.441821	19.5971	0.291985	21.802	21.0847	21.3996	21.2061	21.583	20.5016	19.1857	18.7857	23.2166	22.9874	24.1581	24.8648	24.869	24.6728	25.3759	24.1208	23.751	23.9123	22.7873
gi|1790040270|gb|QHB85983.1|	gi|1790040270|gb|QHB85983.1|	1790040270	QHB85983.1	DNA-binding transcriptional regulator H-NS	Escherichia coli BL21-AI	13	13	12	8	31.0795	48	32	24.1238	23.9556	26.548	5.36746	25.967	3.58812	23.7034	0.747261	24.8982	1.71048	21.2306	0.134613	20.2649	0.0689245	18.7668	0.0243998	18.8169	0.0252626	24.2833	24.0818	23.7861	24.3438	24.2335	24.0653	23.4298	24.0936	26.4283	26.0297	26.8554	26.8785	27.7144	27.1658	27.0898	27.137	25.4336	26.3128	25.9019
gi|1790042468|gb|QHB88181.1|	gi|1790042468|gb|QHB88181.1|	1790042468	QHB88181.1	glutamine--fructose-6-phosphate transaminase (isomerizing)	Escherichia coli BL21-AI	26	26	26	28	28.3109	48	32	21.6025	21.6795	24.0224	5.35129	23.3044	3.25325	20.9473	0.634966	22.4067	1.74622	17.8509	0.0742407	17.1842	0.0467693	18.9087	0.154552	18.1007	0.0882797	22.2897	21.2218	21.1107	21.7879	22.4344	21.7649	20.9516	21.5672	23.3549	23.6483	24.2818	24.8046	24.439	24.6948	24.9265	23.918	22.9728	23.7312	23.1729
gi|1790041016|gb|QHB86729.1|	gi|1790041016|gb|QHB86729.1|	1790041016	QHB86729.1	HTH-type transcriptional regulator GalS	Escherichia coli BL21-AI	4	4	4	20	24.0597	22	12	16.7041	16.371	19.1017	5.26908	18.9661	4.79639			17.7061	2.00271												16.7041		16.371			18.1949	18.351	19.3014	20.5595	19.3952	20.6796	21.0408	19.6842	18.5631	19.0674	18.8315
gi|1790042475|gb|QHB88188.1|	gi|1790042475|gb|QHB88188.1|	1790042475	QHB88188.1	F0F1 ATP synthase subunit B	Escherichia coli BL21-AI	9	9	9	10	26.9447	37	21	20.4208	18.6861	22.7912	5.17057	20.2538	0.890675	19.2812	0.453868	19.996	0.744943					16.8133	0.0820407	14.7915	0.0202021	19.775	20.4284	20.3317	21.1483	18.8824	20.7471	19.7145	15.4005	22.4446	22.7944	22.754	23.1717	23.0062	23.8285	24.097	23.362	17.4967	21.1824	20.3524
gi|1790041433|gb|QHB87146.1|	gi|1790041433|gb|QHB87146.1|	1790041433	QHB87146.1	NADP-dependent succinate-semialdehyde dehydrogenase	Escherichia coli BL21-AI	5	5	5	26	22.322	12	2	14.7878	14.6457	17.1456	5.12592															14.8493	14.8939	14.1771	15.2308		14.5372		14.7542		16.7837		17.5075	19.2591	20.1825	20.1717	16.5231
gi|1790041680|gb|QHB87393.1|	gi|1790041680|gb|QHB87393.1|	1790041680	QHB87393.1	sugar porter family MFS transporter	Escherichia coli BL21-AI	3	3	3	7	24.5627	10	7	18.4294		20.7685	5.06004					20.1136	3.21357							16.7066	0.302953	18.4294								18.7455	23.6159		19.9442		21.9051	21.0933
gi|1790040837|gb|QHB86550.1|	gi|1790040837|gb|QHB86550.1|	1790040837	QHB86550.1	arginine--tRNA ligase	Escherichia coli BL21-AI	10	10	10	33	24.2795	20	11	17.0369		19.3634	5.01582	19.2241	4.55421			17.2199	1.13526											17.0369						18.2852	18.404	19.862	20.9024	20.6724	21.4856	21.3649	19.5761	18.5536	19.9137	19.3839
gi|1790042676|gb|QHB88389.1|	gi|1790042676|gb|QHB88389.1|	1790042676	QHB88389.1	bifunctional L-1,2-propanediol dehydrogenase/glycerol dehydrogenase	Escherichia coli BL21-AI	3	3	3	12	24.9991	27	12	17.7657	17.6782	20.09	5.00846	20.3642	6.05672			19.118	2.5532									17.6095	17.7639	17.9236		18.8014	17.6778	17.0025	17.231	19.7013	19.7912	20.4391	20.4286	19.9236	21.6506	22.0793	20.9913	20.1856	20.2918	20.4498
gi|1790041345|gb|QHB87058.1|	gi|1790041345|gb|QHB87058.1|	1790041345	QHB87058.1	IscS subfamily cysteine desulfurase	Escherichia coli BL21-AI	10	10	10	23	26.3692	45	29	19.1636	19.1584	21.4766	4.96931	21.5564	5.25159	18.0803	0.471942	20.5752	2.66041	14.8714	0.0510396	14.7776	0.0478286	15.8405	0.0999206	15.8098	0.0978166	18.6853	20.2553	18.1741	19.5396	18.5233	19.4396	19.5152	19.1553	20.2426	21.0365	22.2417	22.3857	21.9174	23.1235	23.1121	22.0163	21.2389	21.9054	21.0815
gi|1790039397|gb|QHB85110.1|	gi|1790039397|gb|QHB85110.1|	1790039397	QHB85110.1	cytosol nonspecific dipeptidase	Escherichia coli BL21-AI	15	15	15	22	28.5282	35	19	21.9789	22.1447	24.2792	4.92562	23.8699	3.70901	21.4613	0.698566	22.9417	1.9491	15.2276	0.00928276							21.8951	22.3565	21.5393	22.1246	22.5234	22.055	21.9619	22.0383	23.6502	23.969	24.6268	24.8707	24.5179	24.4397	24.9577	24.0289	23.6048	23.6243	24.2256
gi|1790042346|gb|QHB88059.1|	gi|1790042346|gb|QHB88059.1|	1790042346	QHB88059.1	glutaredoxin 3	Escherichia coli BL21-AI	4	4	4	5	27.3401	28	15	20.8016	20.5382	23.0957	4.9045	22.3581	2.94133	20.3867	0.750088	20.578	0.856434			15.7206	0.029544					20.4261	21.0834		20.8953		20.6594	20.417		22.5366	22.879	23.4529	23.5144	23.9291	23.9249	23.6562	23.2905		22.2782	22.4064
gi|1790042686|gb|QHB88399.1|	gi|1790042686|gb|QHB88399.1|	1790042686	QHB88399.1	phosphoenolpyruvate carboxylase	Escherichia coli BL21-AI	44	44	44	50	27.6806	41	26	18.5964	15.9295	20.8659	4.82165	20.4903	3.71652			18.5123	0.943383	13.5869	0.031046	15.8775	0.151899	17.6494	0.51872	16.1286	0.180774	18.6397	19.7324	18.657	17.3563	17.2448		15.0785	15.4653	20.236	19.1941	21.8229	22.2106	23.5261	24.855	26.3752	23.5785	19.9784	20.9827	20.4322
gi|1790041459|gb|QHB87172.1|	gi|1790041459|gb|QHB87172.1|	1790041459	QHB87172.1	glutamate--cysteine ligase	Escherichia coli BL21-AI	8	8	8	26	28.1297	32	18	21.7652	23.7303	24.0283	4.8005	22.2576	1.4068	23.1068	2.53437	21.9016	1.09916					15.7255	0.0152013	16.1205	0.0199887	18.2303	23.201	23.8642		23.6493		23.4171	24.1243	23.36	23.0425	24.459	25.2519	22.3873	22.4583	23.0406	21.0359	20.6025	22.7122	22.5389
gi|1790042132|gb|QHB87845.1|	gi|1790042132|gb|QHB87845.1|	1790042132	QHB87845.1	Hsp33 family molecular chaperone HslO	Escherichia coli BL21-AI	3	3	3	13	24.1555	28	15	17.2902	17.6129	19.5517	4.79508	19.1658	3.66955	17.0204	0.829463	18.4962	2.30711									17.4423	17.0198	17.506	17.1925	17.6129				18.5312	19.8324	20.0182	19.825	19.7002	19.8231	20.2786	20.6679	17.9097	20.1169	19.0674
gi|1790042564|gb|QHB88277.1|	gi|1790042564|gb|QHB88277.1|	1790042564	QHB88277.1	uridine phosphorylase	Escherichia coli BL21-AI	10	10	10	12	29.2177	48	32	22.7003	21.8021	24.9611	4.79264	24.3924	3.23115	21.8988	0.573745	23.2783	1.49278	18.1721	0.0433386	17.1822	0.0218216	19.4629	0.106035	18.3375	0.0486017	22.477	23.0539	22.5622	22.7082	22.646	22.7785	20.2535	21.5306	24.1168	24.5961	25.3002	25.8315	24.956	25.2299	25.6348	24.9878	24.3596	24.2706	24.4497
gi|1790042650|gb|QHB88363.1|	gi|1790042650|gb|QHB88363.1|	1790042650	QHB88363.1	triose-phosphate isomerase	Escherichia coli BL21-AI	12	12	12	11	30.0117	47	31	23.5397	23.6248	25.7995	4.78922	25.0425	2.83385	22.6815	0.55163	24.2799	1.67044	18.2363	0.0253233	18.1166	0.0233078	19.3353	0.0542437	18.3463	0.0273303	23.6699	23.1778	23.4696	23.8414	24.3679	23.6671	23.3852	23.079	25.4673	25.28	26.2318	26.2188	25.8529	26.0953	25.9268	25.8447	24.2334	25.5199	25.0773
gi|1790039235|gb|QHB84948.1|	gi|1790039235|gb|QHB84948.1|	1790039235	QHB84948.1	L-ribulose-5-phosphate 4-epimerase	Escherichia coli BL21-AI	3	3	3	9	25.0336	25	14	18.5237		20.7797	4.77681	19.9325	2.6551	18.2712	0.83944	19.8947	2.58643									18.2974	18.0266		19.2471					21.0252	19.7258	21.3788	20.9892	21.3712	21.0819	21.5482	20.4408	19.1437	19.927	20.2795
gi|1790039303|gb|QHB85016.1|	gi|1790039303|gb|QHB85016.1|	1790039303	QHB85016.1	3-methyl-2-oxobutanoate hydroxymethyltransferase	Escherichia coli BL21-AI	3	3	3	7	26.1498	28	15	19.0849	19.1566	21.3315	4.74545	21.5256	5.42894			20.114	2.0407	15.3907	0.0772532			16.219	0.137176			19.2083		18.7516	19.2949			18.925	19.3882	20.1416	21.1429	21.2904	22.751	22.0242	22.9855	22.6871	21.7974	21.0117	21.6531	21.6479
gi|1790040004|gb|QHB85717.1|	gi|1790040004|gb|QHB85717.1|	1790040004	QHB85717.1	aminotransferase class I/II-fold pyridoxal phosphate-dependent enzyme	Escherichia coli BL21-AI	20	20	20	24	29.8968	48	32	23.2692	22.7388	25.5156	4.74499	25.1061	3.57241	22.692	0.670289	24.0752	1.74839	16.6707	0.0103195	16.1331	0.00710939	17.2698	0.0156316	17.1853	0.0147425	23.1763	22.985	23.3061	23.6094	23.386	22.5993	22.4217	22.5483	24.9178	25.0962	25.913	26.1352	26.1055	26.0644	26.0769	25.6349	24.5849	25.3414	25.1483
gi|1790042737|gb|QHB88450.1|	gi|1790042737|gb|QHB88450.1|	1790042737	QHB88450.1	glucose-6-phosphate isomerase	Escherichia coli BL21-AI	13	13	13	26	27.1426	42	26	21.0115	20.866	23.2497	4.71803	22.3742	2.57164	19.8286	0.440466	20.6965	0.803842	15.2277	0.0181514	14.1925	0.00885663	16.1236	0.0337756	14.6924	0.012525	20.2853	21.655	20.6661	21.4394	21.3115	21.8343	20.1751	20.1431	22.7497	22.6653	23.6384	23.9452	23.4361	23.2028	22.6604	22.6524	22.3786	22.4472	22.4756
gi|1790041458|gb|QHB87171.1|	gi|1790041458|gb|QHB87171.1|	1790041458	QHB87171.1	S-ribosylhomocysteine lyase	Escherichia coli BL21-AI	6	6	6	8	28.2353	34	18	21.8153	19.979	24.052	4.71331	23.3991	2.99764	19.2297	0.166598	22.414	1.51432			16.534	0.0257132					22.2297	21.9437	20.9389	22.1489	20.8515	21.5135	18.1368	19.4141	23.3795	23.3831	24.6891	24.7564	24.1582	24.1923	24.6709	24.0168	23.4786	23.6815	22.8667
gi|1790041664|gb|QHB87377.1|	gi|1790041664|gb|QHB87377.1|	1790041664	QHB87377.1	class II fructose-bisphosphate aldolase	Escherichia coli BL21-AI	19	19	19	16	30.6353	46	30	24.1666	23.7529	26.3906	4.67182	25.6977	2.88999	23.5438	0.649378	24.8319	1.58587	18.0833	0.0147478	16.887	0.00643584	18.8758	0.0255442	18.3091	0.0172466	24.2036	23.5264	24.3556	24.581	24.3992	23.4357	23.5042	23.6725	25.8382	26.0007	26.6391	27.0846	26.6387	26.7016	26.9109	26.0914	25.4164	25.8296	25.9022
gi|1790040195|gb|QHB85908.1|	gi|1790040195|gb|QHB85908.1|	1790040195	QHB85908.1	NADP-dependent isocitrate dehydrogenase	Escherichia coli BL21-AI	28	28	28	26	30.2569	48	32	23.2565	22.6108	25.4635	4.61696	25.0383	3.43853	22.6124	0.639874	24.045	1.72723	17.9489	0.0252484	17.1621	0.0146344	18.7274	0.0433103	17.6535	0.0205745	23.2266	22.9808	22.9927	23.8261	23.2869	22.7998	22.1852	22.1713	24.6564	25.0565	25.9576	26.1835	26.1423	26.8491	27.654	26.0087	24.7409	25.3331	25.043
gi|1790042037|gb|QHB87750.1|	gi|1790042037|gb|QHB87750.1|	1790042037	QHB87750.1	50S ribosomal protein L6	Escherichia coli BL21-AI	19	19	19	9	31.0909	47	31	24.1868	24.222	26.3923	4.6123	26.1019	3.7713	24.0454	0.906616	25.3292	2.20742	19.0643	0.0287043	17.1092	0.00740293	19.5195	0.0393538	19.3045	0.0339064	23.8322	24.357	24.4513	24.1069	24.3158	24.5779	23.8592	24.1352	25.3787	26.0888	26.8606	27.2412	26.6091	27.3264	28.0804	26.7427	25.7419	26.2394	25.9321
gi|1790042500|gb|QHB88213.1|	gi|1790042500|gb|QHB88213.1|	1790042500	QHB88213.1	branched-chain-amino-acid transaminase	Escherichia coli BL21-AI	4	4	4	13	25.6981	26	12	18.5759	18.4442	20.7792	4.60526	21.0601	5.5953	18.2058	0.773733	19.4045	1.77593									18.419	18.5419		18.7667	18.7492	18.1514	18.4319		20.7052	20.1726	20.903	21.3359	22.463	21.425	22.2155	21.5956	20.211	21.8051	20.9306
gi|1790043082|gb|QHB88795.1|	gi|1790043082|gb|QHB88795.1|	1790043082	QHB88795.1	2,3-diphosphoglycerate-dependent phosphoglycerate mutase GpmB	Escherichia coli BL21-AI	5	5	5	13	23.8799	19	10	15.0426		17.2452	4.60322	17.7654	6.60163			16.1647	2.17666												15.0426					15.5133	17.0325	17.5905	18.8445	18.6545	21.3464	22.4205	19.7723	16.7454	17.702	18.3623
gi|1790041914|gb|QHB87627.1|	gi|1790041914|gb|QHB87627.1|	1790041914	QHB87627.1	polyribonucleotide nucleotidyltransferase	Escherichia coli BL21-AI	10	10	10	30	24.0904	38	24	17.9553	18.11	20.1562	4.59757	19.0908	2.19689	15.4585	0.177165	17.0972	0.551671	15.4539	0.1766	14.4504	0.0880911	15.1161	0.139733	14.4303	0.08687	17.6552		17.6382	18.5726	18.5049	19.1087	16.7163		20.1375	19.153	20.2792	21.055	20.2169	19.9272	20.5507	18.9801	19.8663	18.9399	17.6249
gi|1790042255|gb|QHB87968.1|	gi|1790042255|gb|QHB87968.1|	1790042255	QHB87968.1	sugar kinase	Escherichia coli BL21-AI	4	4	4	9	23.7789	21	12	16.21		18.4026	4.57129	18.3641	4.45081			17.2685	2.08269									16.21								18.0092	18.128	18.6052	18.8681	20.4473	20.5796	21.1979	19.3768	17.6091	18.6733	17.6225
gi|1790041338|gb|QHB87051.1|	gi|1790041338|gb|QHB87051.1|	1790041338	QHB87051.1	aminopeptidase PepB	Escherichia coli BL21-AI	14	14	14	25	26.2894	31	15	19.3831	18.7765	21.5686	4.54872	21.6165	4.70236	18.7973	0.666275	19.8972	1.42809									18.8939	18.8921	19.6928	20.0538	18.6923	19.4274	18.1696	18.8165	21.3021	20.5294	22.2211	22.2218	21.9369	23.0631	23.396	22.1125	20.8545	22.1038	21.8081
gi|1790040032|gb|QHB85745.1|	gi|1790040032|gb|QHB85745.1|	1790040032	QHB85745.1	porin OmpA	Escherichia coli BL21-AI	8	8	8	18	25.5059	22	12	18.8889	20.2135	21.0528	4.48134	20.155	2.40518			20.4456	2.94186												18.8889	20.2135				20.3328	20.3199	21.6903	21.8682	21.582	21.6001	21.7244	20.8485	19.4649	20.3357	20.4337
gi|1790039402|gb|QHB85115.1|	gi|1790039402|gb|QHB85115.1|	1790039402	QHB85115.1	glutamate 5-kinase	Escherichia coli BL21-AI	6	6	6	25	24.1506	26	12	16.677	17.1519	18.8169	4.40743	19.2671	6.02131			17.8012	2.17978									15.963		17.0301	17.0379	17.5903		16.5762	17.2893	18.7001	18.2451	18.5514	19.7712	20.1842	20.5774	20.75	19.9557	17.2974	20.5012	18.8441
gi|1790040967|gb|QHB86680.1|	gi|1790040967|gb|QHB86680.1|	1790040967	QHB86680.1	class I fructose-bisphosphate aldolase	Escherichia coli BL21-AI	5	5	5	17	24.4026	21	10	17.6076	17.1066	19.7392	4.38196	19.9541	5.08583											14.7389	0.136909	16.8972			18.318	17.4447	16.7686			19.354	19.0616	20.0372	20.5038	19.9244	22.5741	21.0757	17.4467	19.2192	21.5706	19.97
gi|1790042048|gb|QHB87761.1|	gi|1790042048|gb|QHB87761.1|	1790042048	QHB87761.1	30S ribosomal protein S19	Escherichia coli BL21-AI	5	5	5	5	27.8809	31	18	19.743	21.8092	21.8701	4.36828	23.62	14.6926					16.8954	0.138925	17.8487	0.269002	16.6697	0.118805	17.2198	0.173956				19.743	22.8959	20.3321	21.6141	22.3947	21.8959	20.1115	22.2663	23.2066	24.2871	24.4182	25.3733	23.4253		24.5262	23.9279
gi|1790042845|gb|QHB88558.1|	gi|1790042845|gb|QHB88558.1|	1790042845	QHB88558.1	aspartate ammonia-lyase	Escherichia coli BL21-AI	24	24	24	23	30.4948	48	32	23.6616	23.618	25.7759	4.32968	25.6851	4.0655	23.2515	0.75254	24.5477	1.84814	19.6333	0.0612849	19.6908	0.0637755	19.5899	0.0594697	19.5064	0.0561238	23.3054	23.3491	23.8766	24.1155	24.4934	23.4843	22.8509	23.6432	25.5465	25.0106	26.1036	26.4428	26.6239	26.9286	27.4155	26.1232	25.071	25.946	25.7767
gi|1790040962|gb|QHB86675.1|	gi|1790040962|gb|QHB86675.1|	1790040962	QHB86675.1	galactitol-1-phosphate 5-dehydrogenase	Escherichia coli BL21-AI	18	18	18	12	31.9479	48	32	25.3722	25.2973	27.4753	4.29642	26.8956	2.87472	24.5171	0.552827	26.0179	1.56455	21.6021	0.0732973	20.1983	0.0277015	21.6868	0.0777275	22.5583	0.14221	25.4962	25.0348	25.5606	25.3972	25.4218	25.3177	25.3535	25.0962	27.1019	26.6168	27.9574	28.2253	27.8831	28.3575	28.4713	27.4756	26.4786	27.0772	26.9805
gi|1790042194|gb|QHB87907.1|	gi|1790042194|gb|QHB87907.1|	1790042194	QHB87907.1	signal recognition particle-docking protein FtsY	Escherichia coli BL21-AI	8	8	8	21	24.4389	20	11	17.7023		19.7915	4.25524	19.35	3.13339			18.3654	1.58353									17.7023								18.5385	18.8695	20.6055	21.1525	19.235	20.7451	20.1308	20.5248	19.6422	20.3974	17.2768
gi|1790042436|gb|QHB88149.1|	gi|1790042436|gb|QHB88149.1|	1790042436	QHB88149.1	sugar-phosphatase	Escherichia coli BL21-AI	7	7	7	15	25.3998	27	14	17.4575	17.111	19.5455	4.25161	18.6259	2.24766	16.3751	0.472233	17.5173	1.04228					15.8347	0.324693					17.6191	17.2959	16.9097	16.7572	17.666		18.9422	18.2358	21.0116	19.9924	21.5838	22.7466	23.1955	20.5239	17.4162	19.7005	17.895
gi|1790041281|gb|QHB86994.1|	gi|1790041281|gb|QHB86994.1|	1790041281	QHB86994.1	GDP-mannose pyrophosphatase NudK	Escherichia coli BL21-AI	1	1	1	7	26.7714	22	10	19.9279	20.1605	21.999	4.20184	21.618	3.22666			21.082	2.22545									19.2411		20.6544	19.8883		20.1605			20.5552	21.9814	22.7879	22.6713	22.5606	23.2808	24.4933	22.5494	21.5251	21.5293	21.6881
gi|1790040616|gb|QHB86329.1|	gi|1790040616|gb|QHB86329.1|	1790040616	QHB86329.1	transcriptional regulator SlyA	Escherichia coli BL21-AI	1	1	1	8	24.4572	20	11	17.5362		19.6064	4.19945	19.4582	3.78966			18.8173	2.43025												17.5362					18.5439	19.7416	19.9127	20.2272	20.3101	21.3195	21.4371	20.6483	19.5787	19.385	19.271
gi|1790042134|gb|QHB87847.1|	gi|1790042134|gb|QHB87847.1|	1790042134	QHB87847.1	phosphoenolpyruvate carboxykinase (ATP)	Escherichia coli BL21-AI	24	24	24	25	29.4405	48	32	23.1256	22.8274	25.1911	4.18578	24.7855	3.16002	22.1975	0.525549	23.8267	1.62576	16.7843	0.0123331	17.1785	0.0162082	17.3901	0.0187693	17.3758	0.0185833	23.6023	22.5162	23.1407	23.2432	23.3986	23.0481	22.3907	22.4724	25.057	24.6007	25.4517	25.655	25.5206	25.6268	25.339	24.7853	24.3722	24.9746	24.7924
gi|1790042053|gb|QHB87766.1|	gi|1790042053|gb|QHB87766.1|	1790042053	QHB87766.1	30S ribosomal protein S10	Escherichia coli BL21-AI	10	10	10	6	30.3893	45	29	23.8635	23.7522	25.9268	4.17951	25.6251	3.39064	23.0886	0.584439	25.0655	2.30054	17.6482	0.0134592	18.3925	0.0225454	18.8132	0.0301792	18.443	0.0233494	23.647	24.0031	23.7017	24.1022	24.4114	23.6349	23.41	23.5523	24.5801	25.8351	26.5522	26.7398	25.2179	25.9198	26.0757	25.472	24.8077	25.8204	25.4078
gi|1790040355|gb|QHB86068.1|	gi|1790040355|gb|QHB86068.1|	1790040355	QHB86068.1	thiol peroxidase	Escherichia coli BL21-AI	6	6	6	7	29.6521	36	20	23.2519	22.3805	25.3152	4.17934	24.811	2.94674	22.7062	0.685034	23.799	1.46115			15.6567	0.00517157	19.3669	0.0676852			23.2641	23.3832	23.0423	23.318	23.161	23.3569	20.2632	22.741	24.6116	24.8019	25.949	25.8983	25.5753	24.9112	25.8333	25.2482	24.7465	24.9728	24.7211
gi|1790042584|gb|QHB88297.1|	gi|1790042584|gb|QHB88297.1|	1790042584	QHB88297.1	Xaa-Pro dipeptidase	Escherichia coli BL21-AI	10	10	10	20	26.5674	32	16	20.0399	20.1217	22.0995	4.16892	21.8607	3.53293	19.4832	0.679851	20.37	1.25715									20.9508	19.8953	18.3793	20.9341	20.5497	20.0096	19.1275	20.8	21.5166	21.8703	22.7121	22.2991	22.7767	22.8493	22.6731	22.3173	21.5982	21.5997	22.4188
gi|1790042052|gb|QHB87765.1|	gi|1790042052|gb|QHB87765.1|	1790042052	QHB87765.1	50S ribosomal protein L3	Escherichia coli BL21-AI	17	17	17	14	30.2836	48	32	22.8854	22.8779	24.9408	4.15662	25.4353	5.85618	22.2459	0.641954	24.306	2.67697	19.028	0.068995	19.3821	0.0881863	19.3819	0.0881773	19.23	0.0793633	21.5945	23.6169	23.4546	22.8754	22.8493	23.5403	22.8141	22.3077	24.2016	24.6728	25.3928	25.4958	25.4037	26.4169	26.7933	25.8173	24.814	25.8019	25.35
gi|1790040649|gb|QHB86362.1|	gi|1790040649|gb|QHB86362.1|	1790040649	QHB86362.1	pyruvate kinase I	Escherichia coli BL21-AI	24	24	24	27	28.4111	39	23	22.0323	21.4627	24.0831	4.14331	23.4882	2.74316	20.7662	0.415769	22.5522	1.43382	13.8315	0.00339872			14.6452	0.00597369			22.4792	21.3508	21.6499	22.6495	22.0979	21.2443	21.4144	21.094	23.8791	23.5843	24.2777	24.5913	24.4815	24.5615	25.1955	24.2971	23.1104	23.9047	23.3987
gi|1790041699|gb|QHB87412.1|	gi|1790041699|gb|QHB87412.1|	1790041699	QHB87412.1	oxidative damage protection protein	Escherichia coli BL21-AI	3	3	3	8	25.4555	25	12	19.2385	18.1524	21.2809	4.11947	20.628	2.61991			19.8317	1.5086									18.3263			20.1507	18.6275	18.5025		17.3273	20.4593	21.2989	21.6332	21.7323	22.2121	21.8909	21.3102	20.8245	20.5452	20.4862	20.8296
gi|1790042667|gb|QHB88380.1|	gi|1790042667|gb|QHB88380.1|	1790042667	QHB88380.1	50S ribosomal protein L31	Escherichia coli BL21-AI	2	2	2	5	27.8953	35	19	21.4983	21.5799	23.5384	4.11301	22.2458	1.6789	20.677	0.565946	22.2909	1.73225	18.7508	0.148909			15.6907	0.017855			20.6709	21.7618	21.6071	21.9532	21.2646	21.5911	21.5966	21.8673	22.4892	23.5599	23.7311	24.3736	23.8351	24.1382	24.3833	23.5417	20.7153	22.3535	22.7768
gi|1790041638|gb|QHB87351.1|	gi|1790041638|gb|QHB87351.1|	1790041638	QHB87351.1	tRNA-modifying protein YgfZ	Escherichia coli BL21-AI	7	7	7	17	26.4487	25	14	19.9695	17.0404	21.9985	4.08101	21.7112	3.34415	18.7524	0.430147	20.6616	1.61561										20.1346		19.8045		17.0404			21.479	21.3485	22.368	22.7984	22.8705	22.7146	22.2327	22.2831	21.6218	22.1936	21.1892
gi|1790042947|gb|QHB88660.1|	gi|1790042947|gb|QHB88660.1|	1790042947	QHB88660.1	aspartate carbamoyltransferase	Escherichia coli BL21-AI	3	3	3	19	23.3027	20	9	17.064		19.0715	4.02074	18.8136	3.3627									14.9423	0.229778				17.2387	16.8819	17.0714					18.3762		18.8863	19.9519	19.2894	18.6592	19.7794	19.4791	17.9344	19.8555	18.4158
gi|1790039749|gb|QHB85462.1|	gi|1790039749|gb|QHB85462.1|	1790039749	QHB85462.1	glutamine--tRNA ligase	Escherichia coli BL21-AI	17	17	17	31	26.3624	46	31	18.67	18.3901	20.6576	3.96575	20.849	4.52866	18.7665	1.06922	19.6666	1.99536	15.7892	0.135769	14.202	0.0451878	14.5896	0.0591133	14.6069	0.0598253	18.2111	18.8318	18.5598	19.0771	19.1288	17.6439		18.3975	21.1438	16.8572	22.5599	22.0693	22.4399	22.8833	24.1963	22.3622	19.9107	21.0307	21.1639
gi|1790041865|gb|QHB87578.1|	gi|1790041865|gb|QHB87578.1|	1790041865	QHB87578.1	enamine/imine deaminase	Escherichia coli BL21-AI	3	3	3	6	25.2725	23	12	18.9524	19.5355	20.9296	3.93748	20.1178	2.24309									17.3669	0.333228	16.4709	0.17906	19.0416	18.8631				19.5355			20.7535		20.3001	21.7353	21.6054	20.4003	21.9758	20.6955	19.3099	20.2746	20.0259
gi|1790040919|gb|QHB86632.1|	gi|1790040919|gb|QHB86632.1|	1790040919	QHB86632.1	glucose-1-phosphate thymidylyltransferase RfbA	Escherichia coli BL21-AI	9	9	9	18	24.0849	16	7	17.2218	16.8648	19.1886	3.90924	19.0172	3.47122																17.2218	16.8648				19.353	18.7345	19.5746	19.0925	18.8715	20.3011	22.4596			18.6938	17.4298
gi|1790040907|gb|QHB86620.1|	gi|1790040907|gb|QHB86620.1|	1790040907	QHB86620.1	NADP-dependent phosphogluconate dehydrogenase	Escherichia coli BL21-AI	17	17	17	24	27.4892	44	28	21.2181	20.3996	23.1811	3.89877	22.6697	2.73507	20.4421	0.58399	21.6966	1.39334	14.1625	0.00751699	14.5159	0.00960356	15.6461	0.0210221	15.759	0.0227329	20.022	21.433	21.3027	22.1147	21.5386	20.1492	19.42	20.4904	22.9837	22.8425	23.4409	23.4574	23.5475	23.9066	23.7333	23.3851	22.4495	22.6203	22.67
gi|1790039267|gb|QHB84980.1|	gi|1790039267|gb|QHB84980.1|	1790039267	QHB84980.1	cell division protein FtsZ	Escherichia coli BL21-AI	19	19	19	24	27.9913	39	23	21.4316	21.4011	23.3846	3.87173	23.1092	3.19898	19.0677	0.194269	22.0253	1.50914			15.7076	0.0189194	17.5943	0.0699615	15.7373	0.0193135	21.7287	20.9481	21.8499	21.1995	21.8216	20.3968	21.6296	21.7563	22.1376	23.1748	24.0454	24.1805	22.4107	23.8036	23.7054	23.3397	21.6777	23.9054	23.0105
gi|1790042554|gb|QHB88267.1|	gi|1790042554|gb|QHB88267.1|	1790042554	QHB88267.1	5-methyltetrahydropteroyltriglutamate--homocysteine S-methyltransferase	Escherichia coli BL21-AI	20	20	20	36	26.9233	48	32	20.404	19.7755	22.3531	3.86135	21.6735	2.41071	19.7032	0.615256	20.6865	1.21632	16.6577	0.0745178	15.8954	0.0439326	18.0692	0.198224	17.3859	0.123443	19.87	20.0983	20.4757	21.172	19.7014	20.4962	19.0626	19.8419	21.8358	22.3429	22.2111	23.0226	22.5714	23.1776	24.2859	22.6903	21.0604	21.6981	21.9171
gi|1790041203|gb|QHB86916.1|	gi|1790041203|gb|QHB86916.1|	1790041203	QHB86916.1	acid-sensing system DNA-binding response regulator EvgA	Escherichia coli BL21-AI	6	6	6	12	25.0214	30	15	18.4992	20.0695	20.4255	3.80068	20.0911	3.01451	17.9546	0.68557	20.7647	4.80806									17.8485	19.3562	18.9004	17.8917	20.2466	19.1953	20.7702	20.0662	20.0014	21.0748	20.25	20.3756	21.9063	20.1058	17.8755	18.9697	20.0135	21.2994	20.4563
gi|1790041665|gb|QHB87378.1|	gi|1790041665|gb|QHB87378.1|	1790041665	QHB87378.1	phosphoglycerate kinase	Escherichia coli BL21-AI	26	26	26	20	31.091	48	32	24.9479	24.5988	26.8527	3.74473	26.025	2.10983	24.2649	0.622887	25.1867	1.18003	20.9622	0.0631234	21.0238	0.0658794	21.1463	0.0717147	21.4347	0.0875859	25.0356	24.5632	24.9936	25.1991	24.9508	24.4542	24.3279	24.6622	26.438	26.4881	27.1308	27.354	27.0147	27.1702	27.1426	26.5151	25.7182	26.1454	26.1498
gi|1790039973|gb|QHB85686.1|	gi|1790039973|gb|QHB85686.1|	1790039973	QHB85686.1	isochorismatase family protein	Escherichia coli BL21-AI	4	4	4	8	27.1931	29	15	20.6647	20.0973	22.5432	3.67697	22.9131	4.75152	20.748	1.05939	21.7776	2.16271									21.2677	20.7263	20.7079	19.957		20.797	19.3976		21.8461	21.0053	23.7382	23.5834	23.5055	22.8036	22.4695	22.694	23.4473	22.7203	22.4589
gi|1790042091|gb|QHB87804.1|	gi|1790042091|gb|QHB87804.1|	1790042091	QHB87804.1	bifunctional acetylornithine/succinyldiaminopimelate transaminase	Escherichia coli BL21-AI	8	8	8	19	25.3836	33	21	17.6091	17.2983	19.485	3.67032	19.3005	3.22959			18.0143	1.32422	15.51	0.233396	12.9259	0.0389236	15.287	0.19998	15.4622	0.225797	17.3386	17.8796				17.7346	16.8621		19.1966	17.0841	20.4607	21.1986	21.8821	22.6584	23.0322	21.2474	19.3235		19.321
gi|1790042770|gb|QHB88483.1|	gi|1790042770|gb|QHB88483.1|	1790042770	QHB88483.1	excinuclease ABC subunit UvrA	Escherichia coli BL21-AI	9	9	9	46	23.3206	21	12	15.0523		16.9063	3.61503	17.8028	6.72973			15.489	1.35357									15.0523								16.3619	15.2458	17.4	18.6173	18.8514	19.9323	21.403	19.2232	16.0699	18.5869	17.713
gi|1790039383|gb|QHB85096.1|	gi|1790039383|gb|QHB85096.1|	1790039383	QHB85096.1	D-sedoheptulose 7-phosphate isomerase	Escherichia coli BL21-AI	6	6	6	13	27.2289	44	28	21.0888	19.0829	22.8935	3.49349	22.3942	2.47141	20.1893	0.53604	21.1346	1.03225	16.5517	0.0430695	15.921	0.0278179	17.0625	0.0613682	16.9173	0.0554932	21.0107	20.0735	21.4105	21.8606	20.3375	19.8526	16.6357	19.5057	22.2803	22.9247	23.0964	23.2727	23.1746	20.1732	24.3551	23.1822	22.7465	22.2515	21.4679
gi|1790041285|gb|QHB86998.1|	gi|1790041285|gb|QHB86998.1|	1790041285	QHB86998.1	succinyl-diaminopimelate desuccinylase	Escherichia coli BL21-AI	1	1	1	21	20.9998	17	8	15.4512	15.025	17.2545	3.49017	16.8887	2.70852	15.3762	0.949304														15.4512		15.025			16.4223	17.3728	17.2407	17.9823	16.8523	17.8587	17.534	16.0954		16.8481
gi|1790039814|gb|QHB85527.1|	gi|1790039814|gb|QHB85527.1|	1790039814	QHB85527.1	2,3-diphosphoglycerate-dependent phosphoglycerate mutase	Escherichia coli BL21-AI	7	7	7	14	26.7253	39	27	20.6679	20.6631	22.4696	3.48614	21.4555	1.72618	19.3677	0.406062	20.5082	0.895173	17.1111	0.0849726	16.5868	0.0590843	17.8016	0.137139	16.6405	0.0613232		20.7148	19.3486	21.9403	20.6631				21.8944	22.3456	22.4185	23.2196	22.4538	22.7185	22.6136	22.2177	21.1744	21.4508	21.102
gi|1790039568|gb|QHB85281.1|	gi|1790039568|gb|QHB85281.1|	1790039568	QHB85281.1	multidrug efflux RND transporter periplasmic adaptor subunit AcrA	Escherichia coli BL21-AI	7	7	7	21	24.485	22	12	18.0027	18.011	19.7997	3.47514	19.7495	3.35627			18.2304	1.17102									18.0027					18.011			19.1514	19.1281	20.3125	20.607	20.2644	20.531	20.4466	19.755	19.0632	20.2025	19.5248
gi|1790042046|gb|QHB87759.1|	gi|1790042046|gb|QHB87759.1|	1790042046	QHB87759.1	30S ribosomal protein S3	Escherichia coli BL21-AI	17	17	17	12	30.5527	47	31	24.1451	23.5357	25.9158	3.41235	25.5949	2.73176	23.8862	0.835727	25.0563	1.88061	18.2242	0.016506	18.9586	0.0274619	20.2879	0.0690055	19.3614	0.0363069	24.0988	24.0783	24.3324	24.0707	23.2664	24.2828	23.3389	23.2545	25.1708	25.8175	26.0357	26.6393	25.6116	26.4662	26.4262	25.8589	24.9254	26.0747	25.429
gi|1790041977|gb|QHB87690.1|	gi|1790041977|gb|QHB87690.1|	1790041977	QHB87690.1	malate dehydrogenase	Escherichia coli BL21-AI	25	25	25	14	31.7045	48	32	25.7268	25.445	27.4942	3.40436	26.8097	2.11839	25.2058	0.696885	26.0072	1.21455	20.8629	0.0343419	20.1991	0.0216775	21.458	0.0518771	20.6343	0.0293104	25.839	25.4831	25.5741	26.0108	25.7452	25.6626	25.0674	25.3047	27.083	27.272	27.6702	27.9514	27.2919	27.6718	27.581	27.2245	26.4864	26.9294	26.9001
gi|1790042660|gb|QHB88373.1|	gi|1790042660|gb|QHB88373.1|	1790042660	QHB88373.1	ribonuclease E activity regulator RraA	Escherichia coli BL21-AI	3	3	3	6	26.6469	30	16	19.9593	18.4906	21.7183	3.38452	22.0264	4.19031			20.2085	1.18857	16.652	0.101021			17.348	0.163651			20.5258	18.6256	20.5967	20.0891	18.7175		18.2637		21.7714	20.6099	22.4286	22.0631	23.208	22.8639	22.8151	22.5417	21.4076	21.4235	22.4789
gi|1790040704|gb|QHB86417.1|	gi|1790040704|gb|QHB86417.1|	1790040704	QHB86417.1	ammonia-dependent NAD(+) synthetase	Escherichia coli BL21-AI	8	8	8	17	25.8027	22	11	19.5352	18.2651	21.2936	3.3833	20.9547	2.67495			20.1343	1.51479										19.5352			18.2666			18.2636	20.5568		21.4845	21.8396	22.1704	22.3391	23.2684	20.507	21.0786	21.88	20.1962
gi|1790042921|gb|QHB88634.1|	gi|1790042921|gb|QHB88634.1|	1790042921	QHB88634.1	3(2),5-bisphosphate nucleotidase CysQ	Escherichia coli BL21-AI	4	4	4	15	25.0745	15	5	18.6908	18.5995	20.4463	3.37627	19.1356	1.36109													18.6908					18.5995			21.2009		20.4993	19.6386	21.0575	22.7581	22.3168	20.3104		19.3142
gi|1790042038|gb|QHB87751.1|	gi|1790042038|gb|QHB87751.1|	1790042038	QHB87751.1	30S ribosomal protein S8	Escherichia coli BL21-AI	7	7	7	9	31.2086	48	32	24.5037	23.7115	26.226	3.29974	26.4986	3.98597	23.6613	0.557713	24.0799	0.745487	21.7062	0.143839	20.8801	0.0811304	21.6261	0.136072	20.7946	0.0764625	24.4573	24.6995	24.1193	24.7386	23.9537	23.4413	23.9077	23.5434	24.7265	25.8798	27.7448	26.5529	26.2553	27.5238	28.5072	25.8935	28.5205	26.8636	25.0611
gi|1790039285|gb|QHB84998.1|	gi|1790039285|gb|QHB84998.1|	1790039285	QHB84998.1	dihydrolipoyl dehydrogenase	Escherichia coli BL21-AI	43	43	43	22	31.4221	48	32	25.3743	25.4021	27.0953	3.29645	26.6586	2.43557	24.4071	0.511465	25.2891	0.942635	19.542	0.0175499	18.8164	0.0106138	20.4564	0.0330797	20.1271	0.0263282	25.46	25.3017	25.0655	25.6703	25.7014	25.513	25.2248	25.1692	26.6262	27.1264	26.9107	27.7178	27.4766	27.7085	27.9733	27.1242	26.0951	27.0335	26.5544
gi|1790042034|gb|QHB87747.1|	gi|1790042034|gb|QHB87747.1|	1790042034	QHB87747.1	50S ribosomal protein L30	Escherichia coli BL21-AI	4	4	4	4	28.5695	31	15	22.2052	21.867	23.9129	3.2665	23.6655	2.75162	21.9628	0.845314	23.0841	1.839									22.8495	20.9548	22.6477	22.3688	23.7355	19.5014	22.8348	21.3963	22.2906	24.5921	24.1045	24.6645	23.97	23.6535	25.6057	23.2716	22.6003	24.3145	23.7624
gi|1790042836|gb|QHB88549.1|	gi|1790042836|gb|QHB88549.1|	1790042836	QHB88549.1	lysine--tRNA ligase	Escherichia coli BL21-AI	48	48	33	28	32.2429	48	32	24.2796	23.6794	25.9659	3.21834	26.1356	3.61999	23.2914	0.5041	24.6535	1.29583	19.4528	0.0352357	19.4204	0.0344527	22.0408	0.211855	20.4289	0.0693128	24.6799	24.1764	24.1037	24.1585	23.8414	24.0736	23.1738	23.6289	25.7269	25.5192	26.17	26.4476	28.0906	29.0797	29.151	28.0943	25.3142	26.212	26.219
gi|1790040682|gb|QHB86395.1|	gi|1790040682|gb|QHB86395.1|	1790040682	QHB86395.1	phenylalanine--tRNA ligase subunit beta	Escherichia coli BL21-AI	13	13	13	38	25.3877	35	21	19.0462	18.7481	20.7251	3.20181	19.953	1.87493			18.0955	0.51738	13.9948	0.0301559			14.7295	0.0501804	13.8207	0.0267277		20.4811	19.5233	17.1342	20.3207		17.8595	18.0642	19.8541	19.2653	21.6386	22.1423	21.2755	21.4425	23.0098	20.7684	20.7959	19.4315	19.9393
gi|1790039324|gb|QHB85037.1|	gi|1790039324|gb|QHB85037.1|	1790039324	QHB85037.1	iron-sulfur cluster insertion protein ErpA	Escherichia coli BL21-AI	3	3	3	6	25.8997	28	15	20.1591	19.3516	21.8368	3.1991	20.886	1.6551	19.4414	0.608062	20.9181	1.69228									19.8543	20.2903	20.0571	20.4347				19.3516	20.9663	21.8734	22.0812	22.4261	19.4949	21.7363	21.9318	21.5038	20.2262	21.1707	20.66
gi|1790040421|gb|QHB86134.1|	gi|1790040421|gb|QHB86134.1|	1790040421	QHB86134.1	DUF465 domain-containing protein	Escherichia coli BL21-AI	5	5	5	4	25.4209	18	8	19.6167	18.7859	21.2936	3.19733	19.8468	1.1729			18.3143	0.405449									18.9613	20.554		19.3347				18.7859	21.8261	20.6555	21.9021	20.7905	22.9684	21.3114	22.5074	21.7153		21.7198
gi|1790042011|gb|QHB87724.1|	gi|1790042011|gb|QHB87724.1|	1790042011	QHB87724.1	gamma carbonic anhydrase family protein	Escherichia coli BL21-AI	3	3	3	12	23.8583	31	16	17.9816	18.2601	19.6505	3.17967	19.434	2.73662	17.553	0.742973	18.3775	1.3158										17.9098	17.9966	18.0384	19.0908	18.6683	17.7036	17.5777	19.1135	19.1934	19.9886	20.3063	19.6301	19.2801	19.1161	19.2553	19.6615	19.683	19.1711
gi|1790039270|gb|QHB84983.1|	gi|1790039270|gb|QHB84983.1|	1790039270	QHB84983.1	preprotein translocase subunit SecA	Escherichia coli BL21-AI	20	20	20	49	25.8196	32	22	19.4125	15.7344	21.081	3.17877	20.8776	2.76082			18.8147	0.660773			15.1182	0.0509673	15.9594	0.0913109	16.3422	0.119057	19.4125				15.7344				20.2671	20.5292	21.3892	22.1386	21.1807	22.6751	22.4558	21.0754	19.7615	22.1825	20.0592
gi|1790040076|gb|QHB85789.1|	gi|1790040076|gb|QHB85789.1|	1790040076	QHB85789.1	bifunctional glucose-1-phosphatase/inositol phosphatase	Escherichia coli BL21-AI	6	6	6	20	24.717	24	10	18.9236	18.8996	20.5918	3.17828	19.1879	1.20102	17.2714	0.318157											17.7977	18.4735	18.3547	21.0685	19.6212	18.1779			20.4879	20.7919	20.051	21.0366	20.4347	21.1134	20.3676	20.7369	19.7972	19.2898	17.5564
gi|1790041648|gb|QHB87361.1|	gi|1790041648|gb|QHB87361.1|	1790041648	QHB87361.1	Xaa-Pro aminopeptidase	Escherichia coli BL21-AI	10	10	10	23	24.8966	32	19	17.9094	18.2477	19.54	3.09642	20.1785	4.82039	16.9348	0.5089	19.8152	3.7472	14.117	0.0721741			14.1086	0.0717561			17.0671	15.3853		21.2758			16.1658	20.3295	20.1719	18.4793	18.7365	20.7722	20.924	21.3591	21.0552	20.3312	19.6271	20.4863	20.7824
gi|1790042081|gb|QHB87794.1|	gi|1790042081|gb|QHB87794.1|	1790042081	QHB87794.1	peptidylprolyl isomerase	Escherichia coli BL21-AI	4	4	4	5	28.1764	47	31	22.1982	22.5698	23.8228	3.08349	22.7337	1.4495	21.8652	0.793871	22.4012	1.15113	20.3472	0.277199	19.143	0.120307	20.8558	0.394358	20.0547	0.226326	21.9744	21.5764	22.7208	22.5212	22.8171	23.2864	22.262	21.9137	22.6599	23.9309	24.3028	24.3973	23.9803	23.0974	23.9753	22.5507	23.1068	22.8157	21.8496
gi|1790039283|gb|QHB84996.1|	gi|1790039283|gb|QHB84996.1|	1790039283	QHB84996.1	pyruvate dehydrogenase (acetyl-transferring), homodimeric type	Escherichia coli BL21-AI	79	79	79	47	32.2001	48	32	24.9572	24.3635	26.5672	3.0525	26.0902	2.19308	23.6267	0.397636	25.0632	1.07625	20.7014	0.0523461	20.4874	0.0451273	21.8634	0.117131	21.0534	0.0668079	25.356	24.4198	24.5876	25.4656	24.899	24.346	24.1052	24.1038	26.2574	25.9835	26.9642	27.0637	28.062	29.5227	29.6611	27.9819	25.787	26.4133	26.0062
gi|1790039511|gb|QHB85224.1|	gi|1790039511|gb|QHB85224.1|	1790039511	QHB85224.1	protein translocase subunit SecF	Escherichia coli BL21-AI	2	2	2	10	25.1691	30	14	19.6576	20.1363	21.2297	2.97323	19.6989	1.02901	18.319	0.395401	19.2597	0.758951									19.9488	19.3625	19.7795	19.5398	19.7406	20.8532	20.2808	19.6706	20.0577	21.211	21.9407	21.7092	20.3306	21.0701	20.658	20.4952	19.4251	20.0186	19.3892
gi|1790040354|gb|QHB86067.1|	gi|1790040354|gb|QHB86067.1|	1790040354	QHB86067.1	transcriptional regulator TyrR	Escherichia coli BL21-AI	2	2	2	28	22.6432	7	2	18.3688		19.921	2.93274																	18.3688								19.0779	20.7642	18.9231	19.1637	18.643	17.0724
gi|1790041915|gb|QHB87628.1|	gi|1790041915|gb|QHB87628.1|	1790041915	QHB87628.1	30S ribosomal protein S15	Escherichia coli BL21-AI	5	5	5	4	29.1477	33	17	22.4596	22.7743	24.0038	2.91642	23.0682	1.52472	23.4418	1.97537	23.0875	1.54524			16.8917	0.0210807					19.7327	23.4385	23.1827	23.4847	24.6549	23.3799	22.4136	20.649	22.7308	24.4839	24.1824	24.6182	24.2819	25.1633	25.9524	24.5898	22.6846	23.304	23.0098
gi|1790040249|gb|QHB85962.1|	gi|1790040249|gb|QHB85962.1|	1790040249	QHB85962.1	peptide chain release factor 1	Escherichia coli BL21-AI	5	5	5	23	25.4584	24	14	18.6271		20.1586	2.89091	19.6408	2.01909	21.6835	8.31882	17.1848	0.367995										22.5443		14.7098					17.2607	22.8271	22.5729	17.9738	18.1435	19.7421	20.7884	18.5446	20.2655	18.6625	18.0132
gi|1790042751|gb|QHB88464.1|	gi|1790042751|gb|QHB88464.1|	1790042751	QHB88464.1	maltose operon protein MalM	Escherichia coli BL21-AI	1	1	1	9	23.6082	18	8	17.3697	18.9161	18.8713	2.8316	18.8991	2.88667			17.5917	1.16631												17.3697	18.9161				18.0445	18.5807	19.2112	19.649	18.9631	19.4745	20.1523	19.0202			18.9184
gi|1790040524|gb|QHB86237.1|	gi|1790040524|gb|QHB86237.1|	1790040524	QHB86237.1	peptidyl-dipeptidase Dcp	Escherichia coli BL21-AI	6	6	6	34	24.0282	25	12	17.2002	16.3689	18.7015	2.83103	19.7864	6.00517			18.1056	1.87305										17.6011		16.7993	16.6683	15.8965		16.5419	16.7598	18.3024	20.0772	19.6667	20.2346	20.2796	20.7965	19.8725	20.149	20.3471	18.9941
gi|1790039730|gb|QHB85443.1|	gi|1790039730|gb|QHB85443.1|	1790039730	QHB85443.1	pyrimidine-specific ribonucleoside hydrolase RihA	Escherichia coli BL21-AI	2	2	2	12	24.9687	31	16	19.2023	19.0788	20.701	2.82593	20.1072	1.87245	18.9226	0.823777	18.9103	0.816786									19.4929	18.8838	19.2301		19.7706	18.7159	18.6882	19.1406	20.1697	20.1594	21.1789	21.2959	20.6933	20.2404	21.12	19.9546	19.3945	20.1805	20.2527
gi|1790040780|gb|QHB86493.1|	gi|1790040780|gb|QHB86493.1|	1790040780	QHB86493.1	mannose/fructose/sorbose family PTS transporter subunit IIC	Escherichia coli BL21-AI	1	1	1	4	27.0467	28	12	21.6557	21.8173	23.1179	2.75533	21.491	0.892122	20.882	0.584934	21.0631	0.663135									21.6645	22.1231	22.0721	20.763	21.2556	22.8073	21.9822	21.2241	22.1213	23.3675	23.4285	23.5544	22.3057	23.1754	22.9381	22.5233	21.3851	22.2526	21.2657
gi|1790042929|gb|QHB88642.1|	gi|1790042929|gb|QHB88642.1|	1790042929	QHB88642.1	inorganic diphosphatase	Escherichia coli BL21-AI	6	6	6	9	27.0148	47	31	21.176	20.5154	22.6158	2.71283	22.0937	1.88916	19.69	0.356996	20.8301	0.786839	18.0635	0.115625	17.6364	0.0859955	18.9083	0.207664	18.6045	0.168229	21.2869	20.6847	21.4133	21.3189	20.7827	20.2522	20.4081	20.6186	22.2489	22.5537	22.2034	23.4571	23.5399	22.4403	22.9103	21.6585	22.4458	22.7253	21.368
gi|1790041241|gb|QHB86954.1|	gi|1790041241|gb|QHB86954.1|	1790041241	QHB86954.1	PTS glucose transporter subunit IIA	Escherichia coli BL21-AI	4	4	4	9	26.9902	33	17	20.7175	19.8655	22.1306	2.66319	22.02	2.46657	19.2024	0.349879	21.4382	1.64797					16.3863	0.0496826			21.7293	20.7814	19.9908	20.3684	20.3551	19.4414	20.4753	19.1904	21.743	21.723	22.5686	22.4878	23.1614	22.9769	22.8753	23.1086	22.4521	22.2057	21.1222
gi|1790041135|gb|QHB86848.1|	gi|1790041135|gb|QHB86848.1|	1790041135	QHB86848.1	NADH-quinone oxidoreductase subunit NuoH	Escherichia coli BL21-AI	2	2	2	9	25.7965	27	14	20.7264	20.7626	22.1133	2.61523	20.1812	0.685288	19.8673	0.551294	20.0978	0.646832									20.5557		20.897			21.444	20.5068	20.3369	21.2565	23.0826	22.0433	22.0709	21.0731	21.6891	21.142	20.8588	19.6142	20.3344	19.8479
gi|1790039191|gb|QHB84904.1|	gi|1790039191|gb|QHB84904.1|	1790039191	QHB84904.1	transaldolase	Escherichia coli BL21-AI	29	29	29	20	31.1047	48	32	25.2583	25.4774	26.6422	2.60959	26.2227	1.95123	24.5874	0.628084	25.1031	0.898	21.8835	0.0964012	21.5552	0.0767766	22.1442	0.11549	21.8263	0.0926525	25.4083	25.3428	24.9816	25.3007	25.601	25.8348	24.9748	25.499	26.2869	26.4645	26.6679	27.1494	27.1115	27.2069	26.928	26.6209	26.1159	26.1611	26.5096
gi|1790042848|gb|QHB88561.1|	gi|1790042848|gb|QHB88561.1|	1790042848	QHB88561.1	co-chaperone GroES	Escherichia coli BL21-AI	5	5	5	5	27.9769	45	29	22.057	21.6453	23.418	2.56851	23.0406	1.97733	20.5515	0.352199	22.5131	1.37181	16.8447	0.0269737	18.6192	0.0922826	19.0664	0.125813	18.1059	0.0646519	21.9468	21.5332	21.0607	23.6875	22.0289	21.8508	20.951	21.7506	22.9549	23.9591	23.3141	23.4438	23.9944	23.42	23.7189	23.9664	22.7794	23.174	22.6729
gi|1790042906|gb|QHB88619.1|	gi|1790042906|gb|QHB88619.1|	1790042906	QHB88619.1	50S ribosomal protein L9	Escherichia coli BL21-AI	16	16	16	11	30.2119	48	32	23.5847	22.498	24.9382	2.55538	24.9465	2.57016	21.6711	0.265438	24.1424	1.47192	19.1806	0.0472326	19.2193	0.0485166	20.4846	0.116618	19.9765	0.0820012	23.2114	23.2319	23.7091	24.1863	22.758	22.9488	22.4519	21.8332	24.1178	24.4339	25.5662	25.6351	26.1614	26.3223	27.0571	25.7324	24.1914	25.3974	24.8069
gi|1790041383|gb|QHB87096.1|	gi|1790041383|gb|QHB87096.1|	1790041383	QHB87096.1	elongation factor 4	Escherichia coli BL21-AI	4	4	4	26	25.1189	30	16	18.1649	19.3755	19.5047	2.53103	19.7817	3.06674	20.535	5.1695	20.0859	3.78679										16.3322	19.7142	18.4484	21.4558		17.9445	18.7263	18.6004	19.6734	19.0818	20.6631	20.5859	21.3482	18.5604	20.1423	18.2713	20.0689	20.9114
gi|1790040156|gb|QHB85869.1|	gi|1790040156|gb|QHB85869.1|	1790040156	QHB85869.1	acyl carrier protein	Escherichia coli BL21-AI	3	3	3	3	28.2858	29	14	21.9276	21.3056	23.2574	2.51363	23.3733	2.72393	21.073	0.553018	22.2118	1.21772									21.4336	21.9587	21.6167	22.7013	21.5296	21.7582	20.6291		22.8272	23.2558	23.5627	23.3838	24.4101	24.5659	24.6875	24.619	22.7559	23.8379	23.1674
gi|1790041095|gb|QHB86808.1|	gi|1790041095|gb|QHB86808.1|	1790041095	QHB86808.1	glycerophosphodiester phosphodiesterase	Escherichia coli BL21-AI	12	12	12	19	28.6876	40	24	22.6708	22.2793	23.9951	2.50424	23.6366	1.95324	22.0847	0.666156	22.5651	0.929377	16.7977	0.0170618			16.1101	0.0105936	17.3833	0.0256039	23.2468	22.9833	21.9782	22.4748	22.2143	22.9534	21.7224	22.227	23.5371	23.7217	24.1402	24.5816	24.8393	25.1149	24.6649	24.6201	23.458	23.7552	23.4164
gi|1790040274|gb|QHB85987.1|	gi|1790040274|gb|QHB85987.1|	1790040274	QHB85987.1	oligopeptide ABC transporter substrate-binding protein OppA	Escherichia coli BL21-AI	3	3	3	31	23.0376	27	13	17.593	16.9941	18.9097	2.49107	17.9431	1.27465	17.4779	0.923341	16.9763	0.652162									17.2774	16.9669		18.5346	17.2494	17.0033	16.7296		19.0103	18.5381	18.0876	20.0029	18.1433	19.5539	18.9328	17.3525		17.017	18.5247
gi|1790042945|gb|QHB88658.1|	gi|1790042945|gb|QHB88658.1|	1790042945	QHB88658.1	2-iminobutanoate/2-iminopropanoate deaminase	Escherichia coli BL21-AI	3	3	3	6	28.0067	31	16	22.459	22.8427	23.7649	2.47236	23.4295	1.9595	22.2402	0.859279	23.0383	1.49407									22.2383	22.2035	23.1283	22.2661	23.2843	22.6992	22.2519	23.1353	23.2022	23.7097	23.9807	24.1672	22.8822	23.1771		23.891	23.1173	23.7119	23.2985
gi|1790040339|gb|QHB86052.1|	gi|1790040339|gb|QHB86052.1|	1790040339	QHB86052.1	thiosulfate sulfurtransferase PspE	Escherichia coli BL21-AI	2	2	2	5	26.8368	34	18	21.2439	20.9619	22.5498	2.47231	22.3359	2.13157	20.4491	0.576416	21.1274	0.922396							15.546	0.0192645	21.0716	21.7721	21.2088	20.9232	20.1786	22.1239	20.3485	21.1965	21.3942	22.2557	23.5896	22.9597	22.2463	21.9177	22.581	22.6271	21.5368	22.8972	22.2788
gi|1790041509|gb|QHB87222.1|	gi|1790041509|gb|QHB87222.1|	1790041509	QHB87222.1	murein hydrolase activator NlpD	Escherichia coli BL21-AI	1	1	1	12	20.4207	8	6	15.6024		16.893	2.44629					15.2708	0.794666										15.1971		16.0078						16.6117	16.9419	17.1255
gi|1790039284|gb|QHB84997.1|	gi|1790039284|gb|QHB84997.1|	1790039284	QHB84997.1	pyruvate dehydrogenase complex dihydrolipoyllysine-residue acetyltransferase	Escherichia coli BL21-AI	40	40	40	35	30.252	47	31	24.558	24.5194	25.8402	2.43224	25.2674	1.63512	23.7446	0.569067	24.4721	0.942192	16.8331	0.00472715	16.23	0.00311206	17.5198	0.00760859	15.9277	0.00252372	24.5247	24.5744	24.1776	24.9552	25.0591	24.5997	24.0918	24.327	25.298	25.5961	26.061	26.4059	25.8978	26.3665	26.6891	25.6799	25.0669	25.3649	25.2896
gi|1790041136|gb|QHB86849.1|	gi|1790041136|gb|QHB86849.1|	1790041136	QHB86849.1	NADH-quinone oxidoreductase subunit NuoG	Escherichia coli BL21-AI	17	17	17	47	25.758	45	29	19.6988	18.3614	20.9714	2.41606	20.5115	1.75649	19.24	0.727623	18.8125	0.541001	14.8746	0.0353012	14.8167	0.0339126	16.3346	0.0971124	15.5522	0.056464	20.2689	18.7893	19.424	20.3129	19.1511	18.5745	18.9695	16.7503	20.1125	20.5801	21.4147	21.7784	21.1214	21.9725	23.0361	20.9698	20.3986	20.804	20.2963
gi|1790040100|gb|QHB85813.1|	gi|1790040100|gb|QHB85813.1|	1790040100	QHB85813.1	PHP domain-containing protein	Escherichia coli BL21-AI	1	1	1	16	22.3277	16	6	17.1636	17.0052	18.4355	2.4148					17.6335	1.38502									17.5192	17.1199	17.044	16.9712	17.2543	16.5894		17.172	18.0984	18.6304	18.1549	18.8582	18.0813	19.2498	18.4658
gi|1790040826|gb|QHB86539.1|	gi|1790040826|gb|QHB86539.1|	1790040826	QHB86539.1	YebC/PmpR family DNA-binding transcriptional regulator	Escherichia coli BL21-AI	2	2	2	9	24.8856	28	15	19.1644	17.5776	20.4206	2.38864	19.8135	1.5681	17.6863	0.358961	19.2573	1.06646										19.1039	18.7979	19.5915	18.7465	16.4088			18.8734	20.8025	21.062	20.9446	20.3452	21.0274	21.2853	20.8592	19.1	20.3778	19.5351
gi|1790041823|gb|QHB87536.1|	gi|1790041823|gb|QHB87536.1|	1790041823	QHB87536.1	G/U mismatch-specific DNA glycosylase	Escherichia coli BL21-AI	2	2	2	10	22.7852	22	10	16.7406	17.2843	17.9686	2.34243	18.0283	2.44129			17.4754	1.66414											16.7963	16.685	17.2603	17.3082			17.7902	17.6705	18.4269	17.9869	17.8339	20.133	19.2376	18.4482	17.2027	18.2966	17.8929
gi|1790039196|gb|QHB84909.1|	gi|1790039196|gb|QHB84909.1|	1790039196	QHB84909.1	molecular chaperone DnaK	Escherichia coli BL21-AI	48	48	48	35	30.6711	48	32	24.8548	24.7691	26.0764	2.332	25.8805	2.03588	24.4542	0.757527	25.1601	1.2357	19.5003	0.0244414	19.4366	0.0233857	20.4071	0.0458269	20.2446	0.0409433	24.9484	24.9251	24.3727	25.173	25.295	24.9114	24.333	24.5369	25.6386	25.7266	26.3144	26.6259	26.4303	26.2811	26.9058	25.7649	25.7616	26.0077	25.8726
gi|1790041934|gb|QHB87647.1|	gi|1790041934|gb|QHB87647.1|	1790041934	QHB87647.1	50S ribosomal protein L21	Escherichia coli BL21-AI	7	7	7	6	30.5381	43	27	24.3187	23.9376	25.5217	2.30214	25.6057	2.4402	24.0764	0.845378	24.9017	1.49799	18.3003	0.015427	17.5931	0.00944913	18.1386	0.0137907	19.2035	0.0288504	24.074	24.2617	24.2529	24.6863	24.5591	23.9278	24.2646	22.9989	24.618	25.5965	25.974	25.8983	26.0962	26.3404	26.6429	26.0897	25.0813	25.6946	25.8342
gi|1790040858|gb|QHB86571.1|	gi|1790040858|gb|QHB86571.1|	1790040858	QHB86571.1	substrate-binding domain-containing protein	Escherichia coli BL21-AI	26	26	26	21	30.2023	48	32	24.4788	24.2887	25.6631	2.27248	25.3991	1.89245	23.7335	0.59654	24.6197	1.10256	18.49	0.0157465	18.1007	0.0120226	18.9811	0.0221323	18.9192	0.0212021	24.4157	24.6366	24.1426	24.7205	24.6691	24.3421	23.6642	24.4795	25.3159	24.9678	26.1655	26.2032	26.0366	26.0946	25.7821	25.9678	25.0257	25.5283	25.5822
gi|1790041229|gb|QHB86942.1|	gi|1790041229|gb|QHB86942.1|	1790041229	QHB86942.1	putative DNA-binding transcriptional regulator	Escherichia coli BL21-AI	1	1	1	6	23.9257	22	13	18.4003	17.9027	19.5651	2.24204	18.9208	1.43442	18.6313	1.17362	19.1281	1.65612										17.9806	18.8684	18.3519	19.1443		16.6651	17.8987		19.1678	18.9756	20.5519	20.2274	21.1822		20.4611	18.3461	19.2535	19.4413
gi|1790039260|gb|QHB84973.1|	gi|1790039260|gb|QHB84973.1|	1790039260	QHB84973.1	UDP-N-acetylmuramoyl-L-alanine--D-glutamate ligase	Escherichia coli BL21-AI	5	5	5	18	27.302	47	31	21.7355	21.9567	22.8841	2.21699	21.5471	0.877605	21.9584	1.16709	22.2049	1.38455	16.5359	0.0272131	16.5704	0.0278716	17.5623	0.0554303	16.6793	0.030056	22.399	20.8482	21.2094	22.4854	22.7015	20.3583	22.2439	22.5232	22.247	23.362	22.694	23.2334	21.685	22.6336	22.58	21.8027	21.0845	20.9404	22.2938
gi|1790039252|gb|QHB84965.1|	gi|1790039252|gb|QHB84965.1|	1790039252	QHB84965.1	catabolite repressor/activator	Escherichia coli BL21-AI	4	4	4	15	24.6603	21	12	19.0467		20.1812	2.19556	19.6164	1.48421	18.8838	0.893273	19.2611	1.16029											19.0467						20.6461		19.8104	20.0872	20.7984	20.6274	21.5601	19.9258	19.6417	19.0179	20.0613
gi|1790043062|gb|QHB88775.1|	gi|1790043062|gb|QHB88775.1|	1790043062	QHB88775.1	molecular chaperone OsmY	Escherichia coli BL21-AI	9	9	9	9	29.4328	48	32	22.5688	24.3984	23.6987	2.18856	24.3209	3.3685	23.9125	2.53814	23.4465	1.83748	23.4709	1.86882	23.2111	1.56091	22.7776	1.15573	22.558	0.99254	22.1996	21.9911	22.0594	24.0249	25.7567	21.7714	25.3082	24.7572	24.3705	24.179	23.4099	22.8355	22.98	22.251	21.9988	23.1019	23.4143	24.5812	25.0485
gi|1790042041|gb|QHB87754.1|	gi|1790042041|gb|QHB87754.1|	1790042041	QHB87754.1	50S ribosomal protein L24	Escherichia coli BL21-AI	8	8	8	6	27.7042	31	16	21.2854	20.1717	22.3912	2.15219	21.3676	1.05858	18.7912	0.177489	21.1264	0.895645										23.5829	20.4355	19.8378	20.5096	19.7716	21.4999	18.9059	21.7415	22.4115	21.9716	23.4404	25.082	24.1121	24.8802	23.695	21.0172	22.9689	19.7045
gi|1790042903|gb|QHB88616.1|	gi|1790042903|gb|QHB88616.1|	1790042903	QHB88616.1	30S ribosomal protein S6	Escherichia coli BL21-AI	8	8	8	7	28.6815	30	15	22.4717	20.5338	23.5723	2.14446	23.1938	1.64962	20.2759	0.218281	22.5266	1.03884										22.3764	22.0648	22.9738	20.7469	20.9237	20.727	19.7378	22.8711	23.1223	24.0586	24.2371	24.2643	25.4571	25.3477	24.9042	22.7202	23.4227	23.345
gi|1790042868|gb|QHB88581.1|	gi|1790042868|gb|QHB88581.1|	1790042868	QHB88581.1	oligoribonuclease	Escherichia coli BL21-AI	4	4	4	11	24.412	26	11	18.4048	18.777	19.5006	2.13727	19.3119	1.8753			17.6203	0.580525									18.2861	19.2875		17.6409	19.7646	17.932	18.7714	18.64	19.8991	18.9243	19.1173	20.0618	20.8219	21.3526	20.9863	19.725	19.004	18.9508	20.0957
gi|1790039964|gb|QHB85677.1|	gi|1790039964|gb|QHB85677.1|	1790039964	QHB85677.1	thioredoxin-disulfide reductase	Escherichia coli BL21-AI	2	2	2	14	23.2946	16	9	18.6804		19.7686	2.12611	18.9042	1.16776			18.1859	0.709826										18.6804							19.7227		20.2826	19.3005	19.1484	20.075	19.4072		19.7207	18.7302	18.3599
gi|1790041462|gb|QHB87175.1|	gi|1790041462|gb|QHB87175.1|	1790041462	QHB87175.1	carbon storage regulator CsrA	Escherichia coli BL21-AI	3	3	3	2	28.0948	43	28	22.2036	21.9727	23.2657	2.08801	22.8615	1.57786	21.8113	0.761947	22.3081	1.07516	20.2436	0.25704	20.7006	0.352839	19.5789	0.162145	20.3271	0.272359	22.5883		21.3855	22.6369	23.2283	21.433	21.0015	22.228	22.4823	24.3329	22.9338	23.3137	23.8109	23.9762	22.5761	24.023	22.1193	22.9217	23.1551
gi|1790039631|gb|QHB85344.1|	gi|1790039631|gb|QHB85344.1|	1790039631	QHB85344.1	fimbrial biogenesis usher protein	Escherichia coli BL21-AI	1	1	1	33	28.8262	34	18	22.6343	22.2125	23.6869	2.07422	23.5207	1.84862	23.9637	2.513	24.543	3.75472							15.3159	0.00626524	19.3262	23.7496	23.5596	23.9018	24.0167	19.3326	21.7789	23.7218	23.8383	23.9274	23.5855	23.3962	24.2464	24.4892	20.8448	23.6228	21.4744	24.3477	24.1317
gi|1790042284|gb|QHB87997.1|	gi|1790042284|gb|QHB87997.1|	1790042284	QHB87997.1	glyoxylate/hydroxypyruvate reductase GhrB	Escherichia coli BL21-AI	6	6	6	13	34.3722	48	32	28.9879	28.3435	30.0044	2.02306	28.1135	0.545479	29.0582	1.04997	29.141	1.11194	25.7198	0.103802	24.7043	0.0513459	25.9611	0.122702	25.5136	0.0899751	30.4682	30.227	26.2271	29.0293	28.7914	30.553	24.992	29.0376	28.63	30.7002	30.5605	30.1271	26.6479	28.2624	25.2406	26.2216	28.8032	27.5603	28.6091
gi|1790041328|gb|QHB87041.1|	gi|1790041328|gb|QHB87041.1|	1790041328	QHB87041.1	histidine--tRNA ligase	Escherichia coli BL21-AI	11	11	11	26	24.9461	16	7	18.036		19.0491	2.01824	19.6094	2.97596													18.036								18.3521	17.26	20.1431	20.4412	19.9966	21.8521	23.5997	19.1582	19.3508	20.3443
gi|1790040796|gb|QHB86509.1|	gi|1790040796|gb|QHB86509.1|	1790040796	QHB86509.1	membrane integrity lipid transport subunit YebS	Escherichia coli BL21-AI	1	1	1	13	27.4654	30	14	21.016	21.4675	22.0286	2.01757	21.8317	1.7601	22.9841	3.9126	23.4124	5.2648									21.156	21.4168	20.0259	21.4653	21.2332	22.8649	20.599	21.1731	21.8027	23.0512	22.6125	20.6481	22.4961	23.7905	22.4694	21.2315	22.7733	20.9398	21.7819
gi|1790041956|gb|QHB87669.1|	gi|1790041956|gb|QHB87669.1|	1790041956	QHB87669.1	isoprenoid biosynthesis glyoxalase ElbB	Escherichia coli BL21-AI	5	5	5	10	27.5486	35	20	22.2845	21.4779	23.2842	1.99963	22.4397	1.11355	21.8829	0.757018	21.8466	0.73819	15.3741	0.00831311	15.3472	0.0081592					22.5359	22.1819	22.4343	21.986	20.6858	22.7991		20.9488	22.9837	22.6805	23.5375	23.9352	23.2215	23.3998	23.2587	22.7754	22.2449	22.2682	22.4439
gi|1790042703|gb|QHB88416.1|	gi|1790042703|gb|QHB88416.1|	1790042703	QHB88416.1	50S ribosomal protein L1	Escherichia coli BL21-AI	16	16	16	13	31.5923	48	32	25.5352	25.3821	26.4689	1.91014	27.0059	2.77146	24.9427	0.663167	25.9429	1.32652	18.9445	0.0103749	19.044	0.0111156	18.8895	0.00998687	19.7876	0.0186118	25.6309	25.5134	25.4327	25.5639	25.8435	25.2749	25.3888	25.0211	25.4774	26.3335	26.9745	27.0902	26.8809	27.3941	27.4554	26.8792	26.0803	27.5027	27.1154
gi|1790042701|gb|QHB88414.1|	gi|1790042701|gb|QHB88414.1|	1790042701	QHB88414.1	transcription terminationtitermination protein NusG	Escherichia coli BL21-AI	5	5	5	11	27.1426	34	18	21.0944	21.3114	21.9985	1.87143	22.3341	2.36145	20.9125	0.88155	21.3351	1.18155					16.5219	0.0420284			20.6802	21.6775	20.6205	21.3994	20.566	21.7165	21.2883	21.675	21.7916	22.3941	22.331	21.4774	22.2875	22.8001	22.9938	22.1086	21.7395	22.4509	22.375
gi|1790043227|gb|QHB88940.1|	gi|1790043227|gb|QHB88940.1|	1790043227	QHB88940.1	dUTP diphosphatase	Escherichia coli BL21-AI	1	1	1	5	24.4736	17	7	19.9058	19.9096	20.8073	1.86806	20.1717	1.20241	19.9955	1.06419											20.3655		19.446		19.6461	20.1427		19.9399	20.2842			21.3304	21.029	20.6606		19.0385		20.5733	20.1584
gi|1790041785|gb|QHB87498.1|	gi|1790041785|gb|QHB87498.1|	1790041785	QHB87498.1	NADPH:quinone oxidoreductase MdaB	Escherichia coli BL21-AI	1	1	1	11	23.2146	27	13	17.9575	17.0585	18.8214	1.81996	18.2794	1.24994	17.4838	0.720087	18.0948	1.09981									17.3582	17.6261	18.2187	18.6271			17.1098	17.0072		18.107	19.5358		18.6326	19.2716	18.6511	18.8005	17.7062	18.3473	18.7846
gi|1790042930|gb|QHB88643.1|	gi|1790042930|gb|QHB88643.1|	1790042930	QHB88643.1	galactofuranose ABC transporter substrate-binding protein YtfQ	Escherichia coli BL21-AI	5	5	5	15	24.4995	26	11	19.6908	18.2808	20.5544	1.81966	19.7559	1.04619			18.2501	0.368413										19.6261	18.6974	20.7488	18.4327	19.7552	17.7334	17.2021	20.7588	19.4206	21.234	20.8043	19.6717	20.8588	20.5293	19.1189		19.351	20.0502
gi|1790039300|gb|QHB85013.1|	gi|1790039300|gb|QHB85013.1|	1790039300	QHB85013.1	aspartate 1-decarboxylase	Escherichia coli BL21-AI	2	2	2	3	25.2466	11	6	21.0028	21.2193	21.8418	1.78892			20.9393	0.956942											21.1814			20.8241	21.0141	22.0099	20.6338		22.0505		22.2198	21.2552
gi|1790039746|gb|QHB85459.1|	gi|1790039746|gb|QHB85459.1|	1790039746	QHB85459.1	N-acetylglucosamine-6-phosphate deacetylase	Escherichia coli BL21-AI	7	7	7	17	26.6217	33	19	21.2235	21.252	22.0499	1.7733	20.8505	0.772174	22.4199	2.2917	21.1243	0.933576	15.4274	0.0179979			15.8898	0.0247968	15.5881	0.0201181	19.8537	20.6176	21.5427	22.8799	21.8575	20.6466			22.4767	22.9414	20.4776	22.3039	21.5096	22.9332	22.5996	21.5862	20.3877	20.326	21.6646
gi|1790040681|gb|QHB86394.1|	gi|1790040681|gb|QHB86394.1|	1790040681	QHB86394.1	integration host factor subunit alpha	Escherichia coli BL21-AI	5	5	5	6	27.1441	38	24	21.8407	20.5224	22.6522	1.75501	20.6789	0.446968	19.0601	0.14553	21.2026	0.642539	17.3923	0.0458042	16.7438	0.0292206	16.6479	0.0273406	16.0188	0.0176784		21.3712	21.751	22.4	21.5983		20.4202	19.5488	22.6721	22.6501	21.8804	23.4061	24.394	23.1636	22.7346	23.9318	20.5844	19.8442	20.4756
gi|1790039229|gb|QHB84942.1|	gi|1790039229|gb|QHB84942.1|	1790039229	QHB84942.1	peptidylprolyl isomerase SurA	Escherichia coli BL21-AI	12	12	12	22	25.1385	32	16	19.0624	18.3334	19.8194	1.69	20.4156	2.55478	19.152	1.0641	20.6882	3.08614									19.0467	18.2911	19.6374	19.2743	18.6695	18.3741	18.1273	18.1625	19.0212	20.3094	19.2002	20.7469	19.4931	18.9114	19.4853	19.9523	20.0325	21.4288	20.0915
gi|1790041271|gb|QHB86984.1|	gi|1790041271|gb|QHB86984.1|	1790041271	QHB86984.1	ethanolamine utilization microcompartment protein EutM	Escherichia coli BL21-AI	1	1	1	7	23.471	29	15	17.9683	17.9667	18.6966	1.65666	18.8657	1.86273	18.0076	1.02762	18.2214	1.19177									18.0549		18.0501	17.7998	18.5639	17.4865		17.8496	18.0254	18.9176	18.7012	19.1421	18.9039	19.3441	19.3347	19.0772		19.1722	18.7028
gi|1790040862|gb|QHB86575.1|	gi|1790040862|gb|QHB86575.1|	1790040862	QHB86575.1	non-heme ferritin	Escherichia coli BL21-AI	10	10	10	6	31.1761	34	18	25.55	25.2422	26.2646	1.64109	26.072	1.436	24.8559	0.618097	27.2487	3.24614					19.2757	0.01292			26.072	25.338	25.2848	25.5052	25.6527	25.2459	24.7872	25.2831	26.7056	25.8339	26.2075	26.3116	26.7323	26.8201	26.3842	26.3826	26.3632	25.9071	25.8673
gi|1790040429|gb|QHB86142.1|	gi|1790040429|gb|QHB86142.1|	1790040429	QHB86142.1	helix-turn-helix domain-containing protein	Escherichia coli BL21-AI	2	2	2	6	26.8881	16	11	20.9956	20.879	21.7056	1.63582	22.859	3.63844	22.7729	3.42765	24.4486	10.9508	17.5124	0.0894224							21.0216		20.9697			20.879				23.5158	21.5381	20.063					21.6636		24.0543
gi|1790039339|gb|QHB85052.1|	gi|1790039339|gb|QHB85052.1|	1790039339	QHB85052.1	ribosome recycling factor	Escherichia coli BL21-AI	11	11	11	11	28.3267	41	25	22.8705	23.042	23.5707	1.62472	23.3785	1.422	21.7061	0.446136	22.1109	0.590624	16.0649	0.00893889	16.3746	0.0110799	16.1392	0.00941128	16.4198	0.011432	23.182	23.5456	21.9346	22.82	23.9185	22.49	22.7861	22.9735	23.8438	23.3648	23.5171	23.5572	24.3207	24.3824	24.1077	24.0065	23.4144	23.7184	23.42
gi|1790042044|gb|QHB87757.1|	gi|1790042044|gb|QHB87757.1|	1790042044	QHB87757.1	50S ribosomal protein L29	Escherichia coli BL21-AI	3	3	3	2	28.2851	16	7	22.6797		23.3676	1.61089	23.0663	1.30729			22.4065	0.827451												22.6797						23.3109	23.3144	23.4774	25.3812	25.5011	24.4952	25.1934		22.8366
gi|1790042036|gb|QHB87749.1|	gi|1790042036|gb|QHB87749.1|	1790042036	QHB87749.1	50S ribosomal protein L18	Escherichia coli BL21-AI	13	13	13	6	32.2503	47	31	26.5367	26.7521	27.1875	1.57007	27.2309	1.61801	26.2818	0.838081	26.6663	1.09398	18.7028	0.00438286	17.847	0.00242189	18.5035	0.00381755	17.9942	0.002682	26.332	26.411	26.6345	26.7691	26.8599	26.7188	26.7758	26.6538	26.2617	27.4219	27.518	27.5483	27.2918	28.1021	28.3009	27.5926	26.411	27.7072	27.2601
gi|1790041995|gb|QHB87708.1|	gi|1790041995|gb|QHB87708.1|	1790041995	QHB87708.1	acetyl-CoA carboxylase biotin carboxylase subunit	Escherichia coli BL21-AI	16	16	16	24	26.619	29	19	20.6716	20.5768	21.2774	1.52184	21.3181	1.56538			19.4601	0.431827	15.0551	0.0203828	14.4957	0.0138319			15.3325	0.0247052		20.6716					20.5768		20.3548	20.1682	21.7112	22.8755	22.6268	23.8521	24.2466	22.7684	20.8993	21.8606	21.2612
gi|1790041418|gb|QHB87131.1|	gi|1790041418|gb|QHB87131.1|	1790041418	QHB87131.1	30S ribosomal protein S16	Escherichia coli BL21-AI	4	4	4	3	29.823	32	16	24.1917	23.81	24.7927	1.51673	24.6622	1.38555	23.3346	0.552077	23.9403	0.840063									23.6903	24.4349	24.8688	23.7728	24.6652	23.9055	23.6136	23.0556	23.6528	25.4347	24.951	25.1321	25.0021	25.7733	26.5565	25.2974	24.209	24.9349	24.7645
gi|1790041238|gb|QHB86951.1|	gi|1790041238|gb|QHB86951.1|	1790041238	QHB86951.1	cysteine synthase A	Escherichia coli BL21-AI	21	21	21	15	29.0351	48	32	23.9086	23.5147	24.4977	1.50427	24.1232	1.16035	22.7048	0.434115	23.2723	0.643372	18.0027	0.0166783	17.5263	0.0119877	18.8504	0.030014	18.3951	0.0218917	24.4461	23.8989	23.5581	23.7314	24.0049	24.0116	22.9785	23.0639	24.2748	24.0036	24.542	25.1704	25.1759	24.6292	24.5188	24.0638	24.8151	23.5385	24.1571
gi|1790039498|gb|QHB85211.1|	gi|1790039498|gb|QHB85211.1|	1790039498	QHB85211.1	fructokinase	Escherichia coli BL21-AI	6	6	6	15	24.9938	18	8	18.9307	19.3772	19.5052	1.48915	19.4256	1.4092									15.8129	0.115195						18.9307		19.3772			19.3452		20.6641	18.5063	19.7115	21.6862	23.119	20.6026	18.6427	19.183
gi|1790041091|gb|QHB86804.1|	gi|1790041091|gb|QHB86804.1|	1790041091	QHB86804.1	ribonucleoside-diphosphate reductase 1 subunit alpha	Escherichia coli BL21-AI	15	15	15	40	24.5206	34	22	18.4338	18.2562	18.985	1.46522	18.6746	1.18161	18.4796	1.03224	17.8907	0.686276	15.416	0.123464	14.7177	0.0760891	15.0116	0.0932836	14.9145	0.0872087		18.6266	17.9243	18.7506		18.2562			17.7502	18.2658	20.0329	19.8909	20.4144	21.0191	22.2176	19.4586	17.6231	20.0776	16.8427
gi|1790040943|gb|QHB86656.1|	gi|1790040943|gb|QHB86656.1|	1790040943	QHB86656.1	dCTP deaminase	Escherichia coli BL21-AI	4	4	4	8	25.039	17	7	19.1206		19.5935	1.3879	20.5531	2.69904													20.8578			17.3835					20.3227	18.0811	20.9335	19.0369	21.496	22.181	20.9579	20.8831		20.0385	20.5677
gi|1790040812|gb|QHB86525.1|	gi|1790040812|gb|QHB86525.1|	1790040812	QHB86525.1	bifunctional 4-hydroxy-2-oxoglutarate aldolase/2-dehydro-3-deoxy-phosphogluconate aldolase	Escherichia coli BL21-AI	5	5	5	11	28.5141	40	24	23.2083	23.0904	23.6772	1.38397	23.7319	1.43753	22.2012	0.497533	22.9903	0.859731	14.222	0.00197173			15.6438	0.00528254	15.1086	0.00364535	23.3675	23.0645	23.0277	23.3737	23.37	23.2967	22.476	23.2189	22.4057	23.5194	24.2484	24.5351	24.5947	23.9185	24.2868	23.3408	23.2343	23.7598	23.8
gi|1790041396|gb|QHB87109.1|	gi|1790041396|gb|QHB87109.1|	1790041396	QHB87109.1	tRNA/rRNA methyltransferase	Escherichia coli BL21-AI	2	2	2	15	24.272	13	6	20.1478	20.4206	20.5743	1.34395			19.2883	0.551155											20.2788	19.8621		20.3024		20.4206				20.6538	20.9017	20.1673		20.4102	20.22	19.7716
gi|1790042692|gb|QHB88405.1|	gi|1790042692|gb|QHB88405.1|	1790042692	QHB88405.1	Si-specific NAD(P)(+) transhydrogenase	Escherichia coli BL21-AI	16	16	16	25	27.4908	40	24	21.0524	21.1234	21.4781	1.34327	21.9184	1.82257	20.7242	0.796566	20.3242	0.603671	16.537	0.0437244	15.6103	0.0230019	16.8203	0.0532127			20.8404	21.2921	20.7404	21.3366	21.4479	21.5877	20.6903	20.7679	20.4059	21.4615	22.3487	21.6964	22.2366	24.2119	25.5974	22.8256	20.6615	22.1897	22.0769
gi|1790040905|gb|QHB86618.1|	gi|1790040905|gb|QHB86618.1|	1790040905	QHB86618.1	bifunctional phosphoribosyl-AMP cyclohydrolase/phosphoribosyl-ATP diphosphatase HisIE	Escherichia coli BL21-AI	2	2	2	6	26.1071	14	5	21.7866	21.5829	22.2039	1.3355					21.5539	0.85105									21.2128	22.5308	21.5823	21.8204	21.2672	22.9474		20.5343		22.4531	23.0942	21.0645			22.3059	20.5432
gi|1790041990|gb|QHB87703.1|	gi|1790041990|gb|QHB87703.1|	1790041990	QHB87703.1	rod shape-determining protein MreC	Escherichia coli BL21-AI	2	2	2	21	23.2272	31	16	17.9811	18.2162	18.3953	1.3325	18.4475	1.38165	17.5859	0.760345	18.2008	1.16447									17.1631	18.4076	18.301	18.0527	18.426	17.571	18.6518		17.2259	19.1969	18.4618	18.6964	18.0545	18.524	18.2059	18.1793	18.3506	18.616	18.5577
gi|1790041051|gb|QHB86764.1|	gi|1790041051|gb|QHB86764.1|	1790041051	QHB86764.1	50S ribosomal protein L25	Escherichia coli BL21-AI	6	6	6	6	27.7536	38	22	22.2229	21.1129	22.6244	1.32087	22.4656	1.18325	18.9734	0.105154	21.9653	0.836514	17.5965	0.0404871	19.5961	0.161905	21.2955	0.525804			20.5446	22.0465	22.6162	23.6842	22.2236	20.4982	21.3029	20.4269	21.7464	22.5226	23.1718	23.0567	24.2854	23.412	23.9062	24.0355	22.2025	22.852	22.027
gi|1790039344|gb|QHB85057.1|	gi|1790039344|gb|QHB85057.1|	1790039344	QHB85057.1	molecular chaperone Skp	Escherichia coli BL21-AI	7	7	7	7	28.2076	47	31	21.8733	20.8921	22.2607	1.3081	21.5113	0.778131	19.9688	0.267113	21.6879	0.879438	18.6078	0.103991	18.1796	0.0772833	20.393	0.358415	19.3816	0.177801	19.7728	21.9941	22.4297	23.2964	23.0358	21.6483	19.8079	19.0765	22.6548	22.1772	21.6389	22.572	24.5797	24.3437	23.9553	23.9835	21.9236	22.038	20.6047
gi|1790039238|gb|QHB84951.1|	gi|1790039238|gb|QHB84951.1|	1790039238	QHB84951.1	DNA-dependent RNA polymerase	Escherichia coli BL21-AI	2	2	2	47	31.6261	46	30	26.2516	27.3743	26.623	1.29358	25.3467	0.534083	26.3714	1.08659	25.2769	0.508827	19.353	0.00838121	13.7524	0.000172723	18.2471	0.00389403	18.3461	0.00417056	27.525	25.8379	26.8711	24.7724	27.1404	26.5792	27.0421	28.7354	25.5607	24.7935	27.6077	28.53	23.8227	26.5271	25.9145	25.8654	23.031	26.0657	26.2216
gi|1790042702|gb|QHB88415.1|	gi|1790042702|gb|QHB88415.1|	1790042702	QHB88415.1	50S ribosomal protein L11	Escherichia coli BL21-AI	10	10	10	8	33.2707	48	32	27.8817	27.655	28.2375	1.27967	28.2729	1.31149	27.7337	0.902516	28.0427	1.11805	23.9138	0.0639068	23.437	0.0459201	23.4059	0.0449407	23.8113	0.0595217	28.0513	27.4125	27.9846	28.0785	28.0966	27.7661	27.3583	27.3992	27.3066	28.4701	28.6678	28.5055	28.3074	28.7799	29.0024	28.7795	27.9921	28.4271	28.2912
gi|1790039988|gb|QHB85701.1|	gi|1790039988|gb|QHB85701.1|	1790039988	QHB85701.1	integration host factor subunit beta	Escherichia coli BL21-AI	3	3	3	4	28.1375	33	18	22.5923	20.8624	22.935	1.26814	22.4087	0.880497	19.6885	0.133616	21.4379	0.449242							17.253	0.0247007	21.6564	22.1661	23.0615	23.4852	21.6303	21.3748	19.5821		20.9844	23.6887	23.5884	23.4785	24.5295	24.5646	24.4774	24.0457	22.2333	23.1667	21.005
gi|1790041451|gb|QHB87164.1|	gi|1790041451|gb|QHB87164.1|	1790041451	QHB87164.1	glycine betaine/L-proline ABC transporter substrate-binding protein ProX	Escherichia coli BL21-AI	3	3	3	12	25.4562	32	18	19.0127	19.4987	19.3506	1.264	21.1615	4.43475	20.7952	3.4403	20.7454	3.32362	15.5809	0.0926717					15.6313	0.0959637		19.9489	19.3061	17.783	20.8695	18.3381	20.5096	18.2774	19.3866	19.3147			21.4563	21.0643	20.4968	20.9804	21.5462	21.2477	20.5993
gi|1790042153|gb|QHB87866.1|	gi|1790042153|gb|QHB87866.1|	1790042153	QHB87866.1	DeoR/GlpR family transcriptional regulator	Escherichia coli BL21-AI	1	1	1	11	25.3866	31	15	20.3687	20.5067	20.6876	1.24742	20.2864	0.944564	20.1063	0.833723	20.2313	0.909163									20.1935	20.5051	20.8333	19.9428	20.6325	20.3969	20.8629	20.1345		20.2677	20.5215	21.2736	20.8538	21.1174	20.6383	20.0363	20.4099	20.2308	19.9498
gi|1790039185|gb|QHB84898.1|	gi|1790039185|gb|QHB84898.1|	1790039185	QHB84898.1	bifunctional aspartate kinase/homoserine dehydrogenase I	Escherichia coli BL21-AI	7	7	7	44	22.366	10	5	17.9479		18.2378	1.22252					16.3921	0.340133										17.9479								17.6126	17.4094	19.6913	15.6287	19.8922	19.837	16.7301
gi|1790042131|gb|QHB87844.1|	gi|1790042131|gb|QHB87844.1|	1790042131	QHB87844.1	ribosome-associated heat shock protein Hsp15	Escherichia coli BL21-AI	2	2	2	5	26.2335	21	12	21.8296	21.6769	22.1149	1.21866	21.2491	0.668698	21.5084	0.800389	21.7173	0.925115									22.1592	22.3839	21.0668	21.7086				21.6769		22.4991	22.3256	21.52	21.5103	21.8351	21.5755	21.1523	21.9316		20.5665
gi|1790042035|gb|QHB87748.1|	gi|1790042035|gb|QHB87748.1|	1790042035	QHB87748.1	30S ribosomal protein S5	Escherichia coli BL21-AI	15	15	15	11	32.1411	48	32	26.8636	26.6847	27.1466	1.21674	27.2043	1.26634	26.6106	0.839151	26.9893	1.09104	21.1517	0.0190786	20.3454	0.0109097	20.2627	0.010302	20.7114	0.0140603	26.7839	26.7378	27.0756	26.8571	26.7256	26.8823	26.4748	26.6561	26.2835	27.3607	27.4105	27.5319	27.4591	27.7018	27.2184	27.2786	26.8551	27.4675	27.0799
gi|1790041341|gb|QHB87054.1|	gi|1790041341|gb|QHB87054.1|	1790041341	QHB87054.1	Fe-S protein assembly chaperone HscA	Escherichia coli BL21-AI	6	6	6	33	22.848	24	14	18.1231		18.3979	1.2099	17.9101	0.862752	15.8305	0.204121	17.4459	0.625402							14.0614	0.0598858		17.6112	18.2353	18.5226					16.4051	18.4067	19.6241	19.1559	17.7245	19.8987	18.3838	17.4911	16.5051	18.4332	17.1098
gi|1790041730|gb|QHB87443.1|	gi|1790041730|gb|QHB87443.1|	1790041730	QHB87443.1	malate synthase G	Escherichia coli BL21-AI	3	3	3	33	25.1361	32	16	19.8139	19.9355	20.0541	1.18116	19.9072	1.06681	20.5616	1.67918	19.8961	1.05861									20.1009	20.0025	19.5088	19.6434	19.568	20.6125	19.7226	19.8387	19.8188	20.4122	20.0971	19.8882	20.1728	21.1423	19.3371	20.2155	20.5064	19.3465	20.8501
gi|1790040029|gb|QHB85742.1|	gi|1790040029|gb|QHB85742.1|	1790040029	QHB85742.1	bifunctional 3-hydroxydecanoyl-ACP dehydratase/trans-2-decenoyl-ACP isomerase	Escherichia coli BL21-AI	1	1	1	9	24.471	26	22	20.4892		20.7157	1.16997	19.8889	0.65961			20.005	0.714907	17.1105	0.0961422	16.2611	0.0533615	17.96	0.173236	17.1432	0.09835			20.231	20.7473					19.6552			21.7762	21.2219	19.9526			20.0815		19.586
gi|1790040630|gb|QHB86343.1|	gi|1790040630|gb|QHB86343.1|	1790040630	QHB86343.1	superoxide dismutase [Fe]	Escherichia coli BL21-AI	12	12	12	9	31.006	48	32	26.1772	25.547	26.3728	1.14523	25.988	0.87706	24.8231	0.391183	25.1502	0.490728	21.7159	0.0453945	21.0107	0.0278434	22.5013	0.0782435	22.016	0.0558929	26.4281	26.5324	25.825	25.9233	25.7558	25.9195	25.2394	25.2733	26.067	26.5437	26.2684	26.6123	27.1814	26.8	25.9141	25.5914	26.4193	26.0077	26.0115
gi|1790042719|gb|QHB88432.1|	gi|1790042719|gb|QHB88432.1|	1790042719	QHB88432.1	DNA-binding protein HU-alpha	Escherichia coli BL21-AI	8	8	7	4	30.5899	47	31	25.7892	24.6945	25.9438	1.11312	23.9988	0.28909	23.5859	0.21714	24.9176	0.546529	20.2987	0.0222431	19.485	0.0126544	21.7519	0.0609063	21.2248	0.0422658	24.9173	25.5979	25.8089	26.8327	26.162	24.3224	23.6057	24.6878	26.155	25.3383	25.9323	26.3496	27.4231	26.9141	25.3689	26.7115	24.8504	24.0439	23.1078
gi|1790039546|gb|QHB85259.1|	gi|1790039546|gb|QHB85259.1|	1790039546	QHB85259.1	DNA-binding protein HU-beta	Escherichia coli BL21-AI	6	5	5	4	29.7484	48	32	24.5802	24.1124	24.7076	1.09232	24.074	0.704048	23.31	0.414606	23.9582	0.649758	18.5638	0.0154478	17.4235	0.00700808	20.4354	0.0565289	17.9416	0.0100365	23.3762	24.3788	25.1314	25.4346	24.8049	23.5716	23.9435	24.1296	24.2479	24.5497	24.9617	25.0712	26.3919	25.805	25.1628	25.8397	23.3244	24.3438	23.9252
gi|1790041684|gb|QHB87397.1|	gi|1790041684|gb|QHB87397.1|	1790041684	QHB87397.1	glutathione synthase	Escherichia coli BL21-AI	7	7	7	19	26.6763	34	19	20.7589	20.8492	20.8515	1.06627	21.6897	1.9063	21.177	1.33612	22.5148	3.37735					14.4697	0.0127861	14.2702	0.0111348	18.8302	21.8485	21.5981		21.7908	21.886	20.4419	19.2781	19.8379	21.3733	20.8936	21.3012	22.4165	22.6207	22.6686	21.4671	21.168	21.6205	22.0036
gi|1790042756|gb|QHB88469.1|	gi|1790042756|gb|QHB88469.1|	1790042756	QHB88469.1	repressor LexA	Escherichia coli BL21-AI	4	4	4	14	26.3789	48	32	21.2952	21.4725	21.3785	1.0594	21.3044	1.00636	21.2283	0.954647	21.0585	0.848641	16.8426	0.0456688	15.9224	0.0241327	17.2132	0.0590465	16.2482	0.0302478	21.2463	21.4171	20.9562	21.5614	21.8574	21.1908	21.4914	21.3504	20.534	21.857	21.4549	21.668	21.5775	21.0729	21.4034	21.1487	20.9861	21.1679	21.5858
gi|1790040465|gb|QHB86178.1|	gi|1790040465|gb|QHB86178.1|	1790040465	QHB86178.1	HigA family addiction module antidote protein	Escherichia coli BL21-AI	1	1	1	4	24.2362	27	13	19.2239	19.3206	19.288	1.04543	19.2835	1.04215	19.3795	1.11387	19.6833	1.37495									19.1867	19.3149	19.1556	19.2385	19.5246	19.4248		19.0122	18.5262	19.5311	19.4515	19.6434	19.2633	20.199		19.5576	19.3936		19.2875
gi|1790042343|gb|QHB88056.1|	gi|1790042343|gb|QHB88056.1|	1790042343	QHB88056.1	serine O-acetyltransferase	Escherichia coli BL21-AI	4	4	4	13	29.5942	48	32	24.9238	24.9328	24.9727	1.03443	23.1704	0.296593	23.5689	0.390964	24.0692	0.553027	18.0267	0.00839005	18.378	0.0107031	21.129	0.0720526	20.8031	0.0574841	24.9872	24.3963	25.4563	24.8555	25.3844	24.8976	25.4288	24.0206	24.6617	25.1598	25.5756	24.4935	23.1075	23.8925	24.0142	23.1927	21.676	22.8932	24.2806
gi|1790039965|gb|QHB85678.1|	gi|1790039965|gb|QHB85678.1|	1790039965	QHB85678.1	leucine-responsive transcriptional regulator Lrp	Escherichia coli BL21-AI	15	15	15	10	30.0864	47	31	24.9536	25.0126	24.9545	1.00059	25.168	1.16023	24.5547	0.758451	25.0418	1.063	16.814	0.00354587	16.021	0.00204645	17.8321	0.00718157	17.5071	0.00573297	24.7439	25.2187	25.2512	24.6007	25.137	25.0716	24.9567	24.8853	24.3119	25.4274	24.8723	25.2062	25.4696	25.2372	25.3809	25.644	24.7432	25.4487	25.1128
gi|1790042010|gb|QHB87723.1|	gi|1790042010|gb|QHB87723.1|	1790042010	QHB87723.1	ATP-binding cassette domain-containing protein	Escherichia coli BL21-AI	1	1	1	14	26.4742	19	11	21.8546	20.3646	21.8465	0.994405			20.6888	0.445706	22.8879	2.04659			14.5468	0.00631148	17.197	0.0396208			19.1732	23.1643	22.9053	22.1759	18.2861	22.4432			18.1057		22.8365	24.5974			19.3644	18.3223
gi|1790042958|gb|QHB88671.1|	gi|1790042958|gb|QHB88671.1|	1790042958	QHB88671.1	valine--tRNA ligase	Escherichia coli BL21-AI	13	13	13	56	27.6555	24	12	23.751	23.7393	23.7182	0.977563	21.2777	0.180084			21.24	0.175436									23.3005	24.2014			23.3351	24.1434			22.3561	24.3561	24.4578	23.7028	21.7706	22.8504	22.0303	23.3444	18.9739	22.321	21.6814
gi|1790039299|gb|QHB85012.1|	gi|1790039299|gb|QHB85012.1|	1790039299	QHB85012.1	polysaccharide deacetylase family protein	Escherichia coli BL21-AI	1	1	1	24	28.8704	46	30	24.3704	23.9805	24.2767	0.937158	22.7921	0.334879	24.2095	0.894459	23.2248	0.452022	16.9371	0.00578563	16.6326	0.00468501	17.1023	0.0064879	16.2917	0.00369905	24.7532	24.0865	24.1282	24.5136	23.7799	24.5319	23.9418	23.6684	23.0572	24.4518	24.8161	24.7818	22.3305	24.1061	24.0049	22.5698	23.2564	22.2423	22.6652
gi|1790039528|gb|QHB85241.1|	gi|1790039528|gb|QHB85241.1|	1790039528	QHB85241.1	YajQ family cyclic di-GMP-binding protein	Escherichia coli BL21-AI	11	11	11	10	28.1444	43	27	22.9132	22.8606	22.8021	0.925921	23.2611	1.27274	23.0257	1.08111	23.4863	1.48777	16.8294	0.0147439	16.7091	0.0135643	17.1119	0.0179333	17.1809	0.0188107	22.9572	22.578	23.3956	22.7219	23.6908	22.6091	22.6575	22.485	22.5693	22.8403	23.0196	22.7792	23.788	23.3026	22.8232	23.3237	23.1143	23.1869	23.5275
gi|1790042229|gb|QHB87942.1|	gi|1790042229|gb|QHB87942.1|	1790042229	QHB87942.1	glutathione-disulfide reductase	Escherichia coli BL21-AI	3	3	3	23	24.8294	33	18	19.9866	19.3739	19.8742	0.925035	19.7121	0.826716	19.5873	0.75819	19.041	0.519203							15.0184	0.0319458		20.5061	20.2611	19.1927	20.1845	19.7793	19.3916	18.1404	19.6021	18.7523	19.8299	21.3125	20.6187	19.8677	19.8746	20.476	20.41	19.8201	19.5191
gi|1790041640|gb|QHB87353.1|	gi|1790041640|gb|QHB87353.1|	1790041640	QHB87353.1	ASCH domain-containing protein	Escherichia coli BL21-AI	2	2	2	6	26.6835	22	11	22.2487	21.9022	22.1172	0.912858	21.226	0.492173			22.0803	0.889807										22.2667		22.2308	21.9444	22.1425	21.6196		22.0865	22.6272	22.7885	20.9667		22.3714	22.5886	22.2807	19.5585	22.3346	21.7848
gi|1790039329|gb|QHB85042.1|	gi|1790039329|gb|QHB85042.1|	1790039329	QHB85042.1	serine endoprotease DegP	Escherichia coli BL21-AI	11	11	11	20	27.8487	36	20	22.6183	22.4611	22.4828	0.910339	23.0419	1.3413	22.495	0.918094	23.0859	1.38286					15.3515	0.00649361	14.7356	0.00423706	22.3745	22.7399	22.9212	22.4376	22.5777	22.784	22.1241	22.3586	21.7411	22.5416	22.5955	23.0529	23.3005	22.7287	22.9698	23.144	23.0988	23.0534	22.8886
gi|1790043069|gb|QHB88782.1|	gi|1790043069|gb|QHB88782.1|	1790043069	QHB88782.1	thymidine phosphorylase	Escherichia coli BL21-AI	12	12	12	27	29.4791	33	19	25.2453	25.1699	25.0962	0.901823	23.8536	0.381131	21.2892	0.0644322	24.1552	0.469741			15.4247	0.00110588					25.702	24.9918	25.0917	25.1956	25.2942			25.0457	24.3778	25.2971	25.4475	25.2624	22.4335	23.7912	24.5904	23.8088	22.5807	24.096	24.3784
gi|1790041994|gb|QHB87707.1|	gi|1790041994|gb|QHB87707.1|	1790041994	QHB87707.1	acetyl-CoA carboxylase biotin carboxyl carrier protein	Escherichia coli BL21-AI	12	12	12	7	37.0702	48	32	31.9416	31.9392	31.7772	0.892252	32.0987	1.11499	31.7581	0.880564	31.9408	0.999444	29.5302	0.187964	28.8938	0.120925	29.3861	0.170105	29.2145	0.151031	32.1271	32.1297	31.8158	31.694	32.1136	31.7525	31.9829	31.9079	31.4316	31.513	32.1094	32.0546	32.391	32.3003	31.8159	31.9461	32.272	32.0732	31.8337
gi|1790043171|gb|QHB88884.1|	gi|1790043171|gb|QHB88884.1|	1790043171	QHB88884.1	dihydroneopterin triphosphate diphosphatase	Escherichia coli BL21-AI	2	2	2	9	25.3887	30	16	20.6021	20.5981	20.4349	0.890557	20.3384	0.83296	20.4118	0.876443	20.6223	1.01408									20.3971	20.67	20.7392		21.0268	20.5477	20.1947	20.6234	19.5979	20.9881	20.5518	20.6017	20.6197	20.2723	20.4482	20.7264	19.9923	20.5728	20.4116
gi|1790041631|gb|QHB87344.1|	gi|1790041631|gb|QHB87344.1|	1790041631	QHB87344.1	peptide chain release factor 2	Escherichia coli BL21-AI	6	6	6	18	25.0203	34	23	20.4941	21.1477	20.3048	0.877039	18.9567	0.344505	19.2918	0.434572	19.3238	0.444326	15.4984	0.0313426	15.6335	0.0344205	16.5589	0.0653713	16.0483	0.0458846	20.9853		20.0029		21.1477				18.6862	19.7118	21.5686	21.2527	20.1518	19.8061	21.6784	20.7768	17.2067	20.7067
gi|1790041673|gb|QHB87386.1|	gi|1790041673|gb|QHB87386.1|	1790041673	QHB87386.1	transketolase	Escherichia coli BL21-AI	29	29	27	28	32.7383	48	32	28.4574	28.3248	28.2569	0.870269	26.0339	0.186411	23.9276	0.0432909	27.2945	0.446621	17.8184	0.000627097	17.7593	0.000601932	17.9389	0.000681755	17.7345	0.000591688	28.9099	28.4945	28.115	28.3102	28.1828	28.1638	28.1894	28.7631	27.9335	28.1379	28.3986	28.5577	26.5586	25.4942	27.3672	27.1421	24.048	24.6483	27.7808
gi|1790042869|gb|QHB88582.1|	gi|1790042869|gb|QHB88582.1|	1790042869	QHB88582.1	tRNA epoxyqueuosine(34) reductase QueG	Escherichia coli BL21-AI	1	1	1	20	24.3414	29	14	19.038	19.2194	18.8168	0.857851	19.0267	0.992202	19.715	1.59881	19.08	1.02953									18.4585	18.7428	19.5908	19.3598	20.7436	19.1073	18.6467	18.38	16.2588	18.4823	18.4164	22.1096	18.5714		18.5425	18.6971		18.5582	19.2504
gi|1790042168|gb|QHB87881.1|	gi|1790042168|gb|QHB87881.1|	1790042168	QHB87881.1	gluconate operon transcriptional repressor GntR	Escherichia coli BL21-AI	1	1	1	18	29.4019	48	32	23.9845	24.0171	23.7597	0.855737	24.0316	1.03315	24.1113	1.09184	24.2431	1.19636	20.3024	0.0779099	22.7396	0.421946	23.1408	0.557207	23.2441	0.598558	24.0424	23.7269	24.2583	23.9103	23.9611	24.0868	23.9458	24.0746	22.682	24.091	24.2985	23.9675	24.4104	24.2559	24.0896	24.3083	24.0886	24.5859	23.6586
gi|1790040301|gb|QHB86014.1|	gi|1790040301|gb|QHB86014.1|	1790040301	QHB86014.1	type I DNA topoisomerase	Escherichia coli BL21-AI	5	5	5	51	24.5323	37	24	18.9048	19.8182	18.6565	0.8419	16.9385	0.255907	19.5721	1.58812	18.2182	0.621315	17.201	0.306972	14.3703	0.0431509			15.7892	0.115372	20.8229	19.1424	15.9815	19.6724	19.6682		19.9682		19.6839	19.4346	17.4988	18.0087	16.9804	20.6233	19.6297	20.8853	16.1472	17.2281	16.9381
gi|1790041808|gb|QHB87521.1|	gi|1790041808|gb|QHB87521.1|	1790041808	QHB87521.1	bifunctional [glutamate--ammonia ligase]-adenylyl-L-tyrosine phosphorylase/[glutamate--ammonia-ligase] adenylyltransferase	Escherichia coli BL21-AI	16	16	16	43	24.4762	20	10	18.4077	18.1541	18.1499	0.836355	16.963	0.367348			16.3323	0.237263											18.4077				18.1541		19.8559	16.8331	14.9089	21.0019	20.3798	21.3458	23.0525	20.6693		17.4527	13.7723
gi|1790041443|gb|QHB87156.1|	gi|1790041443|gb|QHB87156.1|	1790041443	QHB87156.1	DUF2002 family protein	Escherichia coli BL21-AI	5	5	5	7	28.2552	32	16	23.3468	23.2122	23.0496	0.813841	23.2323	0.923671	22.9995	0.786074	23.363	1.0113									23.4481	23.3609	23.203	23.3752	23.1997	23.2787	23.2946	23.0757	22.1062	23.2971	23.3818	23.4134	23.3965	23.4712	23.6042	23.34	23.0861	23.2412	23.2697
gi|1790040296|gb|QHB86009.1|	gi|1790040296|gb|QHB86009.1|	1790040296	QHB86009.1	23S rRNA pseudouridine(2605) synthase RluB	Escherichia coli BL21-AI	4	4	4	14	24.3266	24	11	19.7746	19.3895	19.4702	0.809763	19.5638	0.864028	19.5548	0.858655													19.9752	19.5741	19.2552	19.5413	19.4675	19.2938	19.2136	19.3048	19.4989	19.8635	19.5896	20.484	20.7077	19.8263	19.2101	19.7919	19.5013
gi|1790042276|gb|QHB87989.1|	gi|1790042276|gb|QHB87989.1|	1790042276	QHB87989.1	dipeptide ABC transporter substrate-binding protein DppA	Escherichia coli BL21-AI	28	28	28	27	29.1891	40	24	24.26	24.1649	23.8971	0.777618	24.3469	1.06206	24.005	0.837963	24.3844	1.09001	15.9702	0.00319531			16.0192	0.00330576	15.7864	0.00281305	24.1943	24.307	24.4257	24.1131	24.353	24.3099	24.0746	23.9223	23.2859	24.4042	23.9695	23.929	24.6	24.6551	23.6856	24.1377	24.3414	24.2871	24.4152
gi|1790043008|gb|QHB88721.1|	gi|1790043008|gb|QHB88721.1|	1790043008	QHB88721.1	mannonate dehydratase	Escherichia coli BL21-AI	7	7	7	23	27.8026	37	24	23.5847	22.9123	23.1726	0.751502	21.5832	0.249747	21.5688	0.247254	20.6145	0.127607	16.1508	0.00578329	16.7935	0.00902926	16.0281	0.00531182	16.234	0.00612643		23.41		23.7594	22.6602		22.2759	23.8007	19.6751	24.1212	23.9904	24.9035	19.5436	21.7905	24.1714	20.9938	18.3462	22.9187	22.2879
gi|1790039427|gb|QHB85140.1|	gi|1790039427|gb|QHB85140.1|	1790039427	QHB85140.1	iron-sulfur cluster-binding protein	Escherichia coli BL21-AI	2	2	2	21	25.7156	27	14	21.7433	21.4962	21.2705	0.72056	19.5985	0.226126	20.8201	0.527325	20.4387	0.404816									22.0738	21.5996	21.4769	21.8231	21.5157	21.4512		21.5216	20.8448		21.8122	21.1546	19.1803	18.8177	20.0431	20.938	17.6583	20.212	20.5067
gi|1790040317|gb|QHB86030.1|	gi|1790040317|gb|QHB86030.1|	1790040317	QHB86030.1	exoribonuclease II	Escherichia coli BL21-AI	9	9	9	32	23.5627	20	12	17.8832		17.2288	0.635339	17.1837	0.615761			19.0372	2.2253	14.7016	0.110214					15.4664	0.187267				17.8832					15.4139		17.8427	18.4299	16.3078	20.856	22.3967	18.2212		16.0634	15.7836
gi|1790041783|gb|QHB87496.1|	gi|1790041783|gb|QHB87496.1|	1790041783	QHB87496.1	two-component system sensor histidine kinase QseC	Escherichia coli BL21-AI	2	2	2	25	24.3723	36	23	19.618	19.4988	18.8137	0.572667	19.6272	1.00646	19.5874	0.979035	19.2588	0.779609	14.5645	0.0301123			15.6069	0.062023	14.325	0.0255068	18.777	19.4606	20.543	19.6912	19.8474	19.3239	18.9995	19.8244	17.6904	19.3779	19.4078	18.7789	17.8566	19.5643			20.8101	19.1008	19.1655
gi|1790041333|gb|QHB87046.1|	gi|1790041333|gb|QHB87046.1|	1790041333	QHB87046.1	peptidoglycan glycosyltransferase PbpC	Escherichia coli BL21-AI	1	1	1	47	27.3455	46	30	23.3871	21.9991	22.5328	0.553122	20.8792	0.175812	20.5409	0.139066	22.0517	0.396278	15.9663	0.005836	16.0487	0.00617913	16.0146	0.0060347	16.1565	0.0066584	23.0297	23.7055	23.8692	22.9441	21.3973	23.3777	21.5291	21.6924	21.1528	23.4018	23.7539	21.8225	21.4933	21.5359	22.2493	22.0638	21.6169	20.369	21.0243
gi|1790042453|gb|QHB88166.1|	gi|1790042453|gb|QHB88166.1|	1790042453	QHB88166.1	NCS2 family permease	Escherichia coli BL21-AI	2	2	2	7	26.4329	31	15	22.4873	22.1729	21.5546	0.523874	19.3897	0.116822	20.8886	0.330166	20.2863	0.217486									22.0905	22.344	22.8157	22.6992	22.2109	21.8935	22.3409	22.2462	18.9953	22.6791	22.794	21.7501	19.0123	19.4218	20.9664	20.7953		18.7457	20.0885
gi|1790041755|gb|QHB87468.1|	gi|1790041755|gb|QHB87468.1|	1790041755	QHB87468.1	hydrogenase 2 large subunit	Escherichia coli BL21-AI	8	8	8	31	27.4685	40	24	22.8423	23.0892	21.9026	0.521338	21.0327	0.285284	22.1627	0.624356	21.669	0.443405	16.7007	0.0141646			14.3752	0.00282594	16.102	0.00935341	23.6026	21.264	23.6145	22.8879	22.2702	23.4927	23.772	22.8217	21.5665	20.1413	22.559	23.3434	21.9088	22.6859	23.1754	21.6932	21.9718	21.2048	18.5362
gi|1790040650|gb|QHB86363.1|	gi|1790040650|gb|QHB86363.1|	1790040650	QHB86363.1	major outer membrane lipoprotein	Escherichia coli BL21-AI	1	1	1	5	24.7809	23	9	21.1478	19.7376	20.1114	0.487519	19.8134	0.39654			19.8831	0.416188										20.6607		21.635	20.6496	19.6716	19.5472	19.082	19.5645	20.3047	20.3263	20.2499	19.6875	18.9143	20.8522	20.7532	19.4265		19.4129
gi|1790042731|gb|QHB88444.1|	gi|1790042731|gb|QHB88444.1|	1790042731	QHB88444.1	methionine synthase	Escherichia coli BL21-AI	7	7	7	65	22.4844	23	12	18.1118	17.6721	17.0697	0.485628	16.5664	0.342591			16.8111	0.405924									18.1118						20.2305	15.1137	16.4603	15.5461	18.125	18.1475	16.5415	19.1803	19.4722	16.635	15.3124	17.3036	16.9096
gi|1790042747|gb|QHB88460.1|	gi|1790042747|gb|QHB88460.1|	1790042747	QHB88460.1	maltose ABC transporter permease MalF	Escherichia coli BL21-AI	5	5	5	19	23.4753	14	7	20.0227	20.1096	18.8694	0.449603	17.7957	0.213602																20.0227		20.1096			19.6895	15.5949	20.0232	20.17	15.1776	20.3727	20.6216			18.8832	14.7648
gi|1790039268|gb|QHB84981.1|	gi|1790039268|gb|QHB84981.1|	1790039268	QHB84981.1	UDP-3-O-acyl-N-acetylglucosamine deacetylase	Escherichia coli BL21-AI	3	3	3	15	27.7791	29	14	23.8021	22.8482	22.4535	0.392679	20.9146	0.135136	22.4166	0.382757	22.0735	0.301744									22.9351	24.0976	24.3784	23.7973	21.9935	23.8139	22.6096	22.9758	22.1111	24.9774	24.4323	18.2932	20.3901	18.7243	23.0196		21.0344	20.4256	21.4357
gi|1790042780|gb|QHB88493.1|	gi|1790042780|gb|QHB88493.1|	1790042780	QHB88493.1	acetate--CoA ligase	Escherichia coli BL21-AI	4	4	4	32	23.6162	16	10	19.9781	19.1071	18.4895	0.35636	18.234	0.298522	17.1489	0.140711	18.3625	0.326325											18.8664	21.0898	20.9847		17.2296				18.1851	18.7939					14.1581	19.3201	20.1458
gi|1790043022|gb|QHB88735.1|	gi|1790043022|gb|QHB88735.1|	1790043022	QHB88735.1	2-hydroxyacyl-CoA dehydratase	Escherichia coli BL21-AI	5	5	5	18	26.9691	27	12	23.107	21.7071	21.5526	0.340482	20.5823	0.173776	21.9497	0.448356											22.4488	23.4741	24.3091	22.1959	20.787	23.0769	21.1233	21.8411	21.5805	22.9247	23.5358	18.1695	18.6753	21.1624	22.1101	21.4955	19.9045	19.7273	21.5795
gi|1790039588|gb|QHB85301.1|	gi|1790039588|gb|QHB85301.1|	1790039588	QHB85301.1	copper-exporting P-type ATPase CopA	Escherichia coli BL21-AI	3	3	3	34	25.6838	32	17	20.709	19.6749	18.4866	0.214276	20.8666	1.1154	20.5384	0.888452	20.8165	1.0773	15.4821	0.0267025							20.999	20.1265	21.7915	19.9191	20.1172	19.7494	19.158		17.2074	18.2247	21.692	16.8221	20.3397	21.5251	20.1504	21.0053	21.2013	21.5463	18.9616
gi|1790041252|gb|QHB86965.1|	gi|1790041252|gb|QHB86965.1|	1790041252	QHB86965.1	N-acetylmuramic acid 6-phosphate etherase	Escherichia coli BL21-AI	1	1	1	17	22.6812	11	7	19.1763	18.7458	16.918	0.209012			19.2665	1.06446	17.6786	0.354097										19.1763			18.7458				16.3089			17.5271		18.4669	19.1806
gi|1790041866|gb|QHB87579.1|	gi|1790041866|gb|QHB87579.1|	1790041866	QHB87579.1	2-ketobutyrate formate-lyase/pyruvate formate-lyase	Escherichia coli BL21-AI	10	5	5	42	23.1814	13	6	21.0252		18.2703	0.14815	16.3059	0.0379616													21.0252									16.2637	20.8541	17.6932	16.1535		20.7256	15.3701	15.8461	16.7204
gi|1790042345|gb|QHB88058.1|	gi|1790042345|gb|QHB88058.1|	1790042345	QHB88058.1	protein-export chaperone SecB	Escherichia coli BL21-AI	6	6	6	5	29.1913	26	17		20.3698	25.0331		24.3498				22.8438		17.7628		17.3526											20.3698			24.1468	24.8068	25.46	25.7188	25.3147	25.829	25.6932	24.9015	24.0917	24.6842	23.7794
gi|1790040890|gb|QHB86603.1|	gi|1790040890|gb|QHB86603.1|	1790040890	QHB86603.1	DNA gyrase inhibitor SbmC	Escherichia coli BL21-AI	4	4	4	6	29.0877	24	16			24.2182		24.4195		23.1054		26.1102																		23.8494	23.9766	24.209	24.8377	23.5518	22.9375	23.0472	21.6982	24.3022	24.6763	24.3295
gi|1790042369|gb|QHB88082.1|	gi|1790042369|gb|QHB88082.1|	1790042369	QHB88082.1	50S ribosomal protein L28	Escherichia coli BL21-AI	5	5	5	6	28.8875	24	14		19.1373	23.1404		24.5747		16.7688		21.9686														17.41		20.8645		23.5104	22.6079	23.0763	23.3671	24.5324	25.3636	26.0697	24.831	22.9029	25.5754	24.3108
gi|1790042045|gb|QHB87758.1|	gi|1790042045|gb|QHB87758.1|	1790042045	QHB87758.1	50S ribosomal protein L16	Escherichia coli BL21-AI	3	3	3	3	28.7532	20	11		20.7642	22.2621		24.0226				21.1426																	20.7642	22.6543	21.5853	22.295	22.5137	23.8919	25.6396	24.9499	24.2436	20.4462	26.1166	24.5875
gi|1790041644|gb|QHB87357.1|	gi|1790041644|gb|QHB87357.1|	1790041644	QHB87357.1	glycine cleavage system protein GcvH	Escherichia coli BL21-AI	3	3	3	2	27.9559	16	9			24.2683		23.8427		20.1512		23.4305																		23.7167		23.9539	25.1343	23.342	25.3502	24.76	23.7247			23.8426
gi|1790039294|gb|QHB85007.1|	gi|1790039294|gb|QHB85007.1|	1790039294	QHB85007.1	hypoxanthine phosphoribosyltransferase	Escherichia coli BL21-AI	9	9	9	9	27.7877	17	9			21.4672		21.8349										19.2113												21.696	19.4949	23.0207	21.6572	23.6331	25.3032	25.6967	24.1909		21.4166	21.33
gi|1790039517|gb|QHB85230.1|	gi|1790039517|gb|QHB85230.1|	1790039517	QHB85230.1	6,7-dimethyl-8-ribityllumazine synthase	Escherichia coli BL21-AI	4	4	4	6	27.743	19	11			22.7035		22.9121				21.7645																		23.1373	21.8992	22.4033	23.3741	23.3343	23.5843	23.4018	22.4177	22.0901	22.7514	22.8011
gi|1790039578|gb|QHB85291.1|	gi|1790039578|gb|QHB85291.1|	1790039578	QHB85291.1	molecular chaperone HtpG	Escherichia coli BL21-AI	30	30	30	39	27.568	32	24			23.1634		22.8899				21.8612		15.6879		16.9256		16.8838		16.6901										22.803	22.8503	23.2771	23.723	23.2093	23.6976	23.6075	23.0024	22.6611	23.4063	22.222
gi|1790041312|gb|QHB87025.1|	gi|1790041312|gb|QHB87025.1|	1790041312	QHB87025.1	uracil phosphoribosyltransferase	Escherichia coli BL21-AI	8	8	8	11	27.2517	19	11			22.6947		22.1206				19.7457																		22.6591	22.5349	22.2248	23.36	21.441	23.7327	24.3784	21.2912	20.0307	23.2162	21.5613
gi|1790042136|gb|QHB87849.1|	gi|1790042136|gb|QHB87849.1|	1790042136	QHB87849.1	two-component system response regulator OmpR	Escherichia coli BL21-AI	12	12	12	13	27.2111	21	12		14.842	22.74		22.6295				20.9676																	14.842	21.7982	22.0302	23.422	23.7096	23.0633	23.1691	23.0414	22.8941	22.4113	22.8192	22.0751
gi|1790042291|gb|QHB88004.1|	gi|1790042291|gb|QHB88004.1|	1790042291	QHB88004.1	glycine--tRNA ligase subunit alpha	Escherichia coli BL21-AI	9	9	9	14	27.2093	24	14		17.6343	22.1493		22.0429		17.3571		19.8839														16.8921			18.3765	21.3092	21.7897	22.7461	22.7524	22.8872	23.7706	24.9967	23.2516	21.5698	22.7063	21.2427
gi|1790039491|gb|QHB85204.1|	gi|1790039491|gb|QHB85204.1|	1790039491	QHB85204.1	pyrroline-5-carboxylate reductase	Escherichia coli BL21-AI	4	4	4	8	27.1402	21	13			22.1458		21.8145				19.8767		20.4336				19.2104												22.003		21.5532	22.8813	22.962	23.8251	24.6878	23.1525		20.8911	20.5298
gi|1790039346|gb|QHB85059.1|	gi|1790039346|gb|QHB85059.1|	1790039346	QHB85059.1	3-hydroxyacyl-ACP dehydratase FabZ	Escherichia coli BL21-AI	3	3	3	9	27.0822	26	18			22.6368		22.3996		21.525		21.2642						16.9616		17.3664										22.7047	21.7167	22.0226	24.1033	22.0724	23.0987	23.3877	22.4162	22.6139	22.6652	21.4494
gi|1790041172|gb|QHB86885.1|	gi|1790041172|gb|QHB86885.1|	1790041172	QHB86885.1	USG-1 protein	Escherichia coli BL21-AI	9	9	9	14	27.0742	20	12			22.3101		22.0363				19.9316																		20.8204	22.1095	22.9087	23.402	22.3843	23.7513	24.0045	22.2425	20.8942	22.7417	21.6728
gi|1790042341|gb|QHB88054.1|	gi|1790042341|gb|QHB88054.1|	1790042341	QHB88054.1	quinone-dependent L-lactate dehydrogenase	Escherichia coli BL21-AI	5	5	5	25	27.0636	22	14			23.4086		21.7833				19.3654		16.9174																22.7459	23.067	23.6877	24.134	20.9363	23.4977	23.5673	20.7416	20.5929	22.4549	20.9052
gi|1790040690|gb|QHB86403.1|	gi|1790040690|gb|QHB86403.1|	1790040690	QHB86403.1	phosphotransferase	Escherichia coli BL21-AI	8	8	8	14	27.06	23	15			22.3424		22.3535				20.329						17.127		16.3305										20.6957	22.1009	23.2437	23.3292	22.2848	23.6292	23.545	22.8401	21.5016	23.1325	22.0111
gi|1790039948|gb|QHB85661.1|	gi|1790039948|gb|QHB85661.1|	1790039948	QHB85661.1	ubiquinone-dependent pyruvate dehydrogenase	Escherichia coli BL21-AI	17	17	17	25	26.9326	30	22			21.2454		21.3801				19.7304		15.0616		15.3247		17.1208		16.314										21.2296	19.0868	22.7136	21.9518	22.4525	22.9631	24.8401	22.3132	19.6465	21.7659	21.5052
gi|1790041239|gb|QHB86952.1|	gi|1790041239|gb|QHB86952.1|	1790041239	QHB86952.1	phosphocarrier protein Hpr	Escherichia coli BL21-AI	1	1	1	5	26.9245	32	25		21.7253			21.6088		21.748		22.4174		19.8853		19.5184		20.3032		19.4265						20.9777		22.8726	21.3255									22.6083	20.6818	21.5615
gi|1790039744|gb|QHB85457.1|	gi|1790039744|gb|QHB85457.1|	1790039744	QHB85457.1	ribonucleotide monophosphatase NagD	Escherichia coli BL21-AI	7	7	7	12	26.8915	24	14		16.6884	22.037		21.4143		16.869		19.8														16.722			16.6548	21.1996	21.4651	22.6348	22.8486	21.4514	22.7684	24.3379	21.6542	19.2938	22.0771	21.6191
gi|1790040470|gb|QHB86183.1|	gi|1790040470|gb|QHB86183.1|	1790040470	QHB86183.1	peroxiredoxin OsmC	Escherichia coli BL21-AI	6	6	6	6	26.8648	17	13		18.2381	22.5983		24.1927		18.4768		20.9399														18.1098		18.3663		22.2148	22.5573	23.0653	22.5559					24.7513	24.2452	24.2476
gi|1790040214|gb|QHB85927.1|	gi|1790040214|gb|QHB85927.1|	1790040214	QHB85927.1	septum site-determining protein MinD	Escherichia coli BL21-AI	9	9	9	13	26.7798	19	11			21.4981		21.7729				20.7777																		20.904	19.578	22.7274	22.7829	22.0388	22.7968	23.755	21.993	21.2843	22.0186	21.999
gi|1790039947|gb|QHB85660.1|	gi|1790039947|gb|QHB85660.1|	1790039947	QHB85660.1	low-specificity L-threonine aldolase	Escherichia coli BL21-AI	12	12	12	17	26.7416	20	12			21.3248		21.2499				19.5258																		20.9378	20.0426	22.3729	21.9459	22.4236	23.2907	24.3962	22.1967	19.9426	21.7745	21.3407
gi|1790040291|gb|QHB86004.1|	gi|1790040291|gb|QHB86004.1|	1790040291	QHB86004.1	tryptophan synthase subunit beta	Escherichia coli BL21-AI	9	9	9	17	26.7365	23	15			21.4217		21.3744				17.9143						16.4185		16.1141										20.6266	20.2388	22.5744	22.2471	21.8717	23.3242	24.8262	22.3544	20.0174	21.5756	21.3485
gi|1790041676|gb|QHB87389.1|	gi|1790041676|gb|QHB87389.1|	1790041676	QHB87389.1	biosynthetic arginine decarboxylase	Escherichia coli BL21-AI	15	15	15	28	26.6636	21	12		15.3461	20.8551		20.9289				18.3611														15.3461				20.5754	19.1253	21.8044	21.9153	22.4846	23.6406	25.0757	22.0919	20.5541	21.0107	20.4392
gi|1790040728|gb|QHB86441.1|	gi|1790040728|gb|QHB86441.1|	1790040728	QHB86441.1	NAD(P)H nitroreductase	Escherichia coli BL21-AI	8	8	8	9	26.6517	37	27		18.3232	22.3151		20.0325		19.7551		19.8238		17.6253		17.0216		17.9405		17.069						18.6965			17.95	21.6297	21.7595	23.1799	22.6914	22.8279	23.7217	23.574	22.5913	19.201	21.228	18.8297
gi|1790040153|gb|QHB85866.1|	gi|1790040153|gb|QHB85866.1|	1790040153	QHB85866.1	beta-ketoacyl-ACP synthase III	Escherichia coli BL21-AI	4	4	4	15	26.6378	24	16			21.5247		21.6563				19.4849						16.1933		14.987										20.522	20.6403	22.4415	22.4948	22.7928	22.7747	24.6923	22.9389	20.2847	22.8378	20.6959
gi|1790041332|gb|QHB87045.1|	gi|1790041332|gb|QHB87045.1|	1790041332	QHB87045.1	nucleoside-diphosphate kinase	Escherichia coli BL21-AI	7	7	7	8	26.6075	18	10			22.2978		22.165				20.4808																		22.1093	21.1872	22.8746	23.02	21.5508	23.3661	22.3908	22.3092	21.3456	22.8398	22.6543
gi|1790041141|gb|QHB86854.1|	gi|1790041141|gb|QHB86854.1|	1790041141	QHB86854.1	NADH-quinone oxidoreductase subunit NuoA	Escherichia coli BL21-AI	3	3	3	5	26.5534	21	12		18.9326	22.4444		20.8795				20.0614															18.9326			21.3417	23.1072	22.9616	22.3673	23.3543	24.1158	23.6112	23.1722	21.411	20.8135	20.3411
gi|1790042604|gb|QHB88317.1|	gi|1790042604|gb|QHB88317.1|	1790042604	QHB88317.1	ribosome-dependent GTPase TypA	Escherichia coli BL21-AI	14	14	14	26	26.5483	27	18		17.2679	21.5251		21.7342				20.0937						16.4901		16.2494									17.2679	20.7326	20.4465	22.2465	22.6748	21.8295	23.2561	23.6512	22.4903	21.3971	22.1667	21.4031
gi|1790041109|gb|QHB86822.1|	gi|1790041109|gb|QHB86822.1|	1790041109	QHB86822.1	UDP-4-amino-4-deoxy-L-arabinose aminotransferase	Escherichia coli BL21-AI	10	10	10	16	26.4906	19	11			20.6716		20.7748				18.6851																		19.1218	18.5523	22.481	22.5314	21.9546	22.8992	24.3091	22.2937	19.2678	20.9982	21.2561
gi|1790039756|gb|QHB85469.1|	gi|1790039756|gb|QHB85469.1|	1790039756	QHB85469.1	replication initiation negative regulator SeqA	Escherichia coli BL21-AI	5	5	5	9	26.4371	16	8			20.1491		22.009										16.3009												18.2134			22.0849	21.8925	23.3239	24.4909	22.4244	19.873	22.9567	22.2697
gi|1790042653|gb|QHB88366.1|	gi|1790042653|gb|QHB88366.1|	1790042653	QHB88366.1	DUF406 domain-containing protein	Escherichia coli BL21-AI	2	2	2	4	26.4077	18	10			22.1215		22.0718				21.561																		21.2494	20.6819	23.4064	23.1482	20.7842	20.5795	22.7259	20.8822	22.0541	22.2967	21.3484
gi|1790041991|gb|QHB87704.1|	gi|1790041991|gb|QHB87704.1|	1790041991	QHB87704.1	MreB/Mrl family cell shape determining protein	Escherichia coli BL21-AI	8	8	8	16	26.3273	19	11			21.3985		21.227				19.9711																		20.3799	20.2901	22.1853	22.7388	21.7302	22.8466	23.58	22.226	20.8374	21.5087	21.1459
gi|1790043163|gb|QHB88876.1|	gi|1790043163|gb|QHB88876.1|	1790043163	QHB88876.1	6-phosphofructokinase II	Escherichia coli BL21-AI	11	11	11	16	26.2952	23	14		16.3808	21.6784		20.6957		16.4365								17.7796		16.3446									16.3808	20.4128	20.8512	22.3611	23.0886	21.6439	23.272	23.8128	22.2019	19.2696	21.5642	19.663
gi|1790042749|gb|QHB88462.1|	gi|1790042749|gb|QHB88462.1|	1790042749	QHB88462.1	maltose/maltodextrin ABC transporter ATP-binding protein MalK	Escherichia coli BL21-AI	7	7	7	19	26.287	20	12			20.9185		21.4785				19.8363																		20.3673	18.4612	22.5731	22.2723	22.0764	22.4922	23.3643	21.3018	20.459	21.9159	21.296
gi|1790040624|gb|QHB86337.1|	gi|1790040624|gb|QHB86337.1|	1790040624	QHB86337.1	N-ethylmaleimide reductase	Escherichia coli BL21-AI	16	16	16	22	26.2559	16	8			23.4384		20.5833																						22.6746	22.6364	24.2355	24.2071	21.8955	20.8955	22.0385	21.8688	20.9293	20.233	20.2754
gi|1790040170|gb|QHB85883.1|	gi|1790040170|gb|QHB85883.1|	1790040170	QHB85883.1	hypothetical protein GSU80_05525	Escherichia coli BL21-AI	6	6	6	13	26.2137	20	12			20.6043		19.8906				17.8587																		19.6903	20.998	20.1495	21.5794	21.679	23.7009	24.0161	22.8617	17.8655	21.4627	20.2459
gi|1790039790|gb|QHB85503.1|	gi|1790039790|gb|QHB85503.1|	1790039790	QHB85503.1	succinate dehydrogenase iron-sulfur subunit	Escherichia coli BL21-AI	7	7	7	16	26.1859	22	14			21.29		20.5203				20.1002				15.3339				15.3684										18.966	20.0929	22.5118	23.5894	21.6222	22.3492	24.358	21.2177	19.3241	21.0574	20.7414
gi|1790042736|gb|QHB88449.1|	gi|1790042736|gb|QHB88449.1|	1790042736	QHB88449.1	lysine-sensitive aspartokinase 3	Escherichia coli BL21-AI	9	9	9	21	26.0974	22	14			20.7565		20.8048				17.8152						16.7291												20.667	19.1614	21.3439	21.8535	22.5029	23.4521	23.2935	21.6524	19.6503	21.492	20.3089
gi|1790042572|gb|QHB88285.1|	gi|1790042572|gb|QHB88285.1|	1790042572	QHB88285.1	bifunctional demethylmenaquinone methyltransferase/2-methoxy-6-polyprenyl-1,4-benzoquinol methylase UbiE	Escherichia coli BL21-AI	5	5	5	14	26.0458	22	12		17.275	21.9257		21.4521				20.5803															15.2648		19.2852	21.2918	21.7006	22.1145	22.596	20.8893	22.0479	22.0933	21.9028	21.24	21.8656	21.3304
gi|1790041919|gb|QHB87632.1|	gi|1790041919|gb|QHB87632.1|	1790041919	QHB87632.1	transcription terminationtitermination protein NusA	Escherichia coli BL21-AI	16	16	16	27	25.9311	22	14			20.4905		20.6918				19.1401		14.1148																20.9601	19.0039	20.1029	21.895	20.6392	22.3925	24.0598	20.585	19.9022	21.0232	20.0246
gi|1790040190|gb|QHB85903.1|	gi|1790040190|gb|QHB85903.1|	1790040190	QHB85903.1	adenylosuccinate lyase	Escherichia coli BL21-AI	13	13	13	24	25.8689	21	12		15.5873	21.6716		21.2899				19.558																	15.5873	20.857	22.1803	21.4793	22.1698	21.2309	22.2779	22.3308	21.08	20.5407	21.7444	21.0603
gi|1790039212|gb|QHB84925.1|	gi|1790039212|gb|QHB84925.1|	1790039212	QHB84925.1	carbamoyl-phosphate synthase small subunit	Escherichia coli BL21-AI	7	7	7	14	25.8317	21	13			20.7874		20.4695										15.8346		15.7913										20.1463	20.4128	21.0949	21.4957	22.1037	22.918	23.7088	21.4759	20.1436	20.8486	19.5877
gi|1790039983|gb|QHB85696.1|	gi|1790039983|gb|QHB85696.1|	1790039983	QHB85696.1	3-phosphoserine/phosphohydroxythreonine transaminase	Escherichia coli BL21-AI	7	7	7	19	25.8286	18	10			21.6979		21.4807				19.3213																		21.7854		21.4191	21.8893	22.2203	22.7414	22.7971	21.0581	21.3307	21.624	21.2291
gi|1790042766|gb|QHB88479.1|	gi|1790042766|gb|QHB88479.1|	1790042766	QHB88479.1	aromatic amino acid transaminase	Escherichia coli BL21-AI	10	10	10	19	25.8266	18	10			19.7334		19.3421				17.4651																		19.6165	17.3671	20.8663	21.0836	22.0708	22.8605	23.5362	21.6424	17.9691	20.0434	18.6388
gi|1790041194|gb|QHB86907.1|	gi|1790041194|gb|QHB86907.1|	1790041194	QHB86907.1	DUF406 family protein	Escherichia coli BL21-AI	1	1	1	5	25.7743	18	10			21.251		21.3098				20.0043																		20.1292	21.2347	21.6958	21.9445	21.7136	21.696	22.7841	21.4779	21.1281	21.2486	21.1579
gi|1790039327|gb|QHB85040.1|	gi|1790039327|gb|QHB85040.1|	1790039327	QHB85040.1	5-methylthioadenosine/S-adenosylhomocysteine nucleosidase	Escherichia coli BL21-AI	4	4	4	10	25.7367	30	22			21.3761		20.4804				18.8014		17.9275		17.1533		18.5312		17.9873										19.7069	21.2423	21.8614	22.694	22.0251	22.6014	22.114	21.6885	18.9971	21.0483	20.7851
gi|1790041937|gb|QHB87650.1|	gi|1790041937|gb|QHB87650.1|	1790041937	QHB87650.1	UDP-N-acetylglucosamine 1-carboxyvinyltransferase	Escherichia coli BL21-AI	7	7	7	24	25.7323	18	10			20.2054		20.1681				18.0193																		19.7377	19.4439	21.5307	20.1094	21.6489	22.9508	23.4458	21.9995	17.5983	21.1995	20.2723
gi|1790041222|gb|QHB86935.1|	gi|1790041222|gb|QHB86935.1|	1790041222	QHB86935.1	glucokinase	Escherichia coli BL21-AI	5	5	5	16	25.7256	20	12			19.5823		20.4758				18.6502																		19.4741	19.5309	20.6105	18.7138	22.4648	23.0885	23.3592	22.1174	19.4571	20.7828	20.7134
gi|1790043078|gb|QHB88791.1|	gi|1790043078|gb|QHB88791.1|	1790043078	QHB88791.1	energy-dependent translational throttle protein EttA	Escherichia coli BL21-AI	19	19	19	33	25.7191	25	16		13.3038	20.4632		20.6675				18.4609				14.3073				15.1348								13.3038		18.5495	20.0567	21.6524	21.5943	20.2723	22.6461	22.992	21.269	19.5807	21.4136	20.1893
gi|1790043083|gb|QHB88796.1|	gi|1790043083|gb|QHB88796.1|	1790043083	QHB88796.1	MDR efflux pump AcrAB transcriptional activator RobA	Escherichia coli BL21-AI	2	2	2	12	25.6953	11	7					21.3846				20.3157																										21.3242	21.796	21.2504
gi|1790039891|gb|QHB85604.1|	gi|1790039891|gb|QHB85604.1|	1790039891	QHB85604.1	glutathione S-transferase	Escherichia coli BL21-AI	5	5	5	13	25.6597	20	12			20.5894		20.492				19.5795																		18.76	20.3208	21.5182	21.7585	21.5606	22.0012	22.0907	20.6272	19.7238	21.097	20.549
gi|1790039496|gb|QHB85209.1|	gi|1790039496|gb|QHB85209.1|	1790039496	QHB85209.1	pyrimidine/purine nucleoside phosphorylase	Escherichia coli BL21-AI	1	1	1	2	25.6441	4	2					22.9096																										23.8562			22.9924		23.012
gi|1790041013|gb|QHB86726.1|	gi|1790041013|gb|QHB86726.1|	1790041013	QHB86726.1	NAD-dependent dihydropyrimidine dehydrogenase subunit PreA	Escherichia coli BL21-AI	7	7	7	17	25.6085	19	11			20.4334		19.7858				17.3412																		19.8905		21.4303	19.9794	21.3698	22.0553	23.6572	21.0445	19.6085	20.6229	18.8187
gi|1790041140|gb|QHB86853.1|	gi|1790041140|gb|QHB86853.1|	1790041140	QHB86853.1	NADH-quinone oxidoreductase subunit B	Escherichia coli BL21-AI	7	7	7	15	25.5989	29	21			21.7218		20.2017		18.5614		19.5008		17.567		15.3158				15.8164										21.2196		21.6474	22.2983	20.5633	22.5323	22.6892	21.6799	20.4783	20.8882	20.1557
gi|1790043143|gb|QHB88856.1|	gi|1790043143|gb|QHB88856.1|	1790043143	QHB88856.1	orotidine-5-phosphate decarboxylase	Escherichia coli BL21-AI	5	5	5	14	25.5457	22	14			21.0901		20.324				18.6938		15.3293																20.2104	19.6611	22.1658	22.323	20.5594	22.3751	22.0839	20.9631	19.3575	20.7282	20.4493
gi|1790039302|gb|QHB85015.1|	gi|1790039302|gb|QHB85015.1|	1790039302	QHB85015.1	pantoate--beta-alanine ligase	Escherichia coli BL21-AI	10	10	10	18	25.5362	18	10			21.0915		20.5482										17.3118												20.9991	19.4456	21.4355	22.4858	21.2733	22.0065	22.466	21.7983	19.9553	21.0351	20.2426
gi|1790041119|gb|QHB86832.1|	gi|1790041119|gb|QHB86832.1|	1790041119	QHB86832.1	1,4-dihydroxy-2-naphthoyl-CoA synthase	Escherichia coli BL21-AI	5	5	5	11	25.52	14	6			21.3799		20.4259																						20.0734		21.6844	22.3817	21.9036	21.9551	22.3885	21.5429		18.8716	21.4632
gi|1790039740|gb|QHB85453.1|	gi|1790039740|gb|QHB85453.1|	1790039740	QHB85453.1	AAA family ATPase	Escherichia coli BL21-AI	11	11	11	19	25.5059	19	11			20.8234		20.6695				18.6399																		20.493	19.9844	21.2821	21.5342	21.4643	21.6476	22.4987	21.1737	19.4183	21.4929	20.4214
gi|1790042755|gb|QHB88468.1|	gi|1790042755|gb|QHB88468.1|	1790042755	QHB88468.1	diacylglycerol kinase	Escherichia coli BL21-AI	1	1	1	7	25.4477	20	12			21.9117		20.4994				19.5047																		20.6397	22.5	22.0317	22.4753	20.8692	21.6809	21.6235	21.115	19.9225	21.1578	20.1234
gi|1790039856|gb|QHB85569.1|	gi|1790039856|gb|QHB85569.1|	1790039856	QHB85569.1	malate/lactate/ureidoglycolate dehydrogenase	Escherichia coli BL21-AI	5	5	5	14	25.4319	14	6			20.3872		20.1512																						18.4181		21.4859	21.2576	18.0665	23.3195	23.2372	20.2855		20.0771	18.9435
gi|1790039694|gb|QHB85407.1|	gi|1790039694|gb|QHB85407.1|	1790039694	QHB85407.1	universal stress protein UspG	Escherichia coli BL21-AI	3	3	3	7	25.4283	17	9			20.084		20.509				19.8988																		19.0844	19.3409	20.8415	21.0693	21.3235	21.0376	21.4625	21.1513		21.1936	19.3001
gi|1790041183|gb|QHB86896.1|	gi|1790041183|gb|QHB86896.1|	1790041183	QHB86896.1	50S ribosomal protein L3 N(5)-glutamine methyltransferase	Escherichia coli BL21-AI	3	3	3	9	25.4174	18	10			20.5616		20.8099				19.4933																		19.8885	19.8141	20.805	21.739	21.4491	22.0648	21.9299	20.8608	20.1336	21.306	20.414
gi|1790041290|gb|QHB87003.1|	gi|1790041290|gb|QHB87003.1|	1790041290	QHB87003.1	phosphoribosylaminoimidazolesuccinocarboxamide synthase	Escherichia coli BL21-AI	3	3	3	13	25.4014	18	10			21.513		19.972				18.7311																		20.496	21.2453	22.3427	21.968	21.2573	21.326	21.7476	20.7888		21.7451	18.0076
gi|1790041173|gb|QHB86886.1|	gi|1790041173|gb|QHB86886.1|	1790041173	QHB86886.1	4-phosphoerythronate dehydrogenase PdxB	Escherichia coli BL21-AI	11	11	11	24	25.395	19	11			20.3673		19.5101				16.9578						15.0576												18.7374		20.9753	21.3891	21.9208	22.1793	22.8448	21.6312	18.4184	20.3775	19.4457
gi|1790039978|gb|QHB85691.1|	gi|1790039978|gb|QHB85691.1|	1790039978	QHB85691.1	pyruvate formate lyase 1-activating protein	Escherichia coli BL21-AI	4	4	4	14	25.348	20	12			19.961		20.0169				18.6531																		18.7067	18.9434	20.9996	21.1944	20.6062	22.2994	22.8012	21.4469	18.7921	20.9212	19.5439
gi|1790040640|gb|QHB86353.1|	gi|1790040640|gb|QHB86353.1|	1790040640	QHB86353.1	monooxygenase	Escherichia coli BL21-AI	2	2	2	7	25.308	24	18			21.3342		21.6418		19.1877		20.4682				15.3914														19.987	21.0805	22.0525	22.2167	19.218	19.2488	20.2467		20.545	21.9109	22.1939
gi|1790040101|gb|QHB85814.1|	gi|1790040101|gb|QHB85814.1|	1790040101	QHB85814.1	molecular chaperone	Escherichia coli BL21-AI	3	3	3	9	25.2968	16	8			19.7815		19.7211																						18.8724	18.7985	20.0331	21.4221	20.0522	21.7461	23.3838	19.3756	18.5142	21.1296	19.3645
gi|1790041092|gb|QHB86805.1|	gi|1790041092|gb|QHB86805.1|	1790041092	QHB86805.1	ribonucleotide-diphosphate reductase subunit beta	Escherichia coli BL21-AI	8	8	8	20	25.2776	16	8			20.3378		20.3489																						20.2385	19.0227	20.3494	21.7406	21.7693	22.4491	21.9546	20.9592	20.8356	20.3352	19.2989
gi|1790039409|gb|QHB85122.1|	gi|1790039409|gb|QHB85122.1|	1790039409	QHB85122.1	DUF1440 domain-containing protein	Escherichia coli BL21-AI	2	2	2	7	25.2765	15	7			20.6687		20.294																						19.0439	21.073	21.4042	21.1535	21.0496	23.0054	22.5565	21.4577		20.7661	20.0203
gi|1790042915|gb|QHB88628.1|	gi|1790042915|gb|QHB88628.1|	1790042915	QHB88628.1	peptidylprolyl isomerase	Escherichia coli BL21-AI	4	4	4	9	25.2754	21	12		19.3765	20.5017		20.0301				19.4803																19.3765		19.5335	19.8179	21.4455	21.21	20.8554	20.4892	20.7374	20.6481	20.4083	20.8921	18.492
gi|1790042688|gb|QHB88401.1|	gi|1790042688|gb|QHB88401.1|	1790042688	QHB88401.1	N-acetyl-gamma-glutamyl-phosphate reductase	Escherichia coli BL21-AI	4	4	4	14	25.2439	14	6			18.3101		19.328										14.6445												17.2287		19.3915		20.3195	22.2732	23.5859	19.8171		18.672
gi|1790040163|gb|QHB85876.1|	gi|1790040163|gb|QHB85876.1|	1790040163	QHB85876.1	PTS glucose transporter subunit IIBC	Escherichia coli BL21-AI	9	9	9	16	25.2213	19	12			21.2696		17.5477				17.0246								14.8724										19.2181	23.4774	20.072	22.3107	21.4004	22.7705	22.4083	21.2927	17.1668	17.9285
gi|1790041929|gb|QHB87642.1|	gi|1790041929|gb|QHB87642.1|	1790041929	QHB87642.1	transcription elongation factor GreA	Escherichia coli BL21-AI	4	4	4	11	25.1872	19	11			20.6463		20.0342				18.378						18.5725												19.7874	19.3867	20.5223	22.8886	21.4567	22.1896	22.1111	21.5246	20.0836	20.1117	19.9072
gi|1790041918|gb|QHB87631.1|	gi|1790041918|gb|QHB87631.1|	1790041918	QHB87631.1	translation initiation factor IF-2	Escherichia coli BL21-AI	20	20	20	45	25.1774	22	14			19.9158		20.1652				18.2743						14.7329												18.9683	19.1984	20.4074	21.0891	21.2391	21.6135	22.2003	21.216	18.8005	21.4615	19.7191
gi|1790040295|gb|QHB86008.1|	gi|1790040295|gb|QHB86008.1|	1790040295	QHB86008.1	threonylcarbamoyl-AMP synthase	Escherichia coli BL21-AI	2	2	2	9	25.1019	17	9			19.7136		20.0563				19.4926																		18.1088		19.6053	21.4269	20.8902	21.7543	22.4667	21.3178	20.3773	20.6662	18.2651
gi|1790039712|gb|QHB85425.1|	gi|1790039712|gb|QHB85425.1|	1790039712	QHB85425.1	lipoyl synthase	Escherichia coli BL21-AI	3	3	3	17	25.0979	18	10			20.3006		19.6347				18.9556																		20.2875	19.5072	20.6969	20.7109	20.1915	22.1432	22.0517	21.1192	17.6744	21.134	19.5133
gi|1790042344|gb|QHB88057.1|	gi|1790042344|gb|QHB88057.1|	1790042344	QHB88057.1	NAD(P)H-dependent glycerol-3-phosphate dehydrogenase	Escherichia coli BL21-AI	6	6	6	14	25.0842	6	2			19.8179																										20.2186	19.4172	20.4489	22.3308	24.3731	20.5915
gi|1790040637|gb|QHB86350.1|	gi|1790040637|gb|QHB86350.1|	1790040637	QHB86350.1	riboflavin synthase	Escherichia coli BL21-AI	3	3	3	11	25.0073	16	8			20.3689		19.845																						19.5319	19.8963	20.3066	21.7407	21.6108	21.5942	22.0051	19.847	18.1401	21.1308	19.8315
gi|1790041700|gb|QHB87413.1|	gi|1790041700|gb|QHB87413.1|	1790041700	QHB87413.1	MFS transporter	Escherichia coli BL21-AI	1	1	1	8	25.0011	20	12		17.8066	20.7147		20.7387				21.5263															17.8066			19.1867	21.4112	20.9393	21.3219	18.8783	19.7145	20.2687	19.4173	20.0348	21.2161	20.5901
gi|1790041335|gb|QHB87048.1|	gi|1790041335|gb|QHB87048.1|	1790041335	QHB87048.1	3-mercaptopyruvate sulfurtransferase	Escherichia coli BL21-AI	8	8	8	14	24.9971	20	12			20.6884		19.81										17.3772		16.171										20.7393		19.9906	21.3353	20.5554	20.9249	20.8136	19.0153	18.724	21.4999
gi|1790039211|gb|QHB84924.1|	gi|1790039211|gb|QHB84924.1|	1790039211	QHB84924.1	4-hydroxy-tetrahydrodipicolinate reductase	Escherichia coli BL21-AI	5	5	5	19	24.9562	22	12		18.2154	20.3495		19.9132		17.5046		18.7455														18.5266	18.0862	18.0334		19.3883		20.7091	20.9511	20.9366	21.0512	22.3958		18.6371	20.9783	18.5226
gi|1790040395|gb|QHB86108.1|	gi|1790040395|gb|QHB86108.1|	1790040395	QHB86108.1	pyruvate:ferredoxin (flavodoxin) oxidoreductase	Escherichia coli BL21-AI	29	29	29	59	24.9034	24	16			17.9409		17.6774				15.6064						13.6716		14.9098										18.711	15.9534	18.7346	18.3647	19.6304	20.6942	23.9071	18.9469	15.848	18.8503	16.5164
gi|1790041391|gb|QHB87104.1|	gi|1790041391|gb|QHB87104.1|	1790041391	QHB87104.1	ATP-dependent RNA helicase SrmB	Escherichia coli BL21-AI	13	13	13	22	24.8757	24	16			18.5656		19.7643								14.3804		15.3859		14.6846										18.1567	17.5204	18.7228	19.8626	20.101	22.4874	22.4612	20.6327	17.5217	21.6282	19.4818
gi|1790042641|gb|QHB88354.1|	gi|1790042641|gb|QHB88354.1|	1790042641	QHB88354.1	superoxide dismutase [Mn]	Escherichia coli BL21-AI	4	4	4	9	24.8731	18	10	19.0229	19.6606			20.6433	3.07459	19.2124	1.14042	20.9541	3.81381										19.0504		18.9953	21.072		19.5855	18.3242									20.796	20.9924	21.1915
gi|1790041110|gb|QHB86823.1|	gi|1790041110|gb|QHB86823.1|	1790041110	QHB86823.1	undecaprenyl-phosphate 4-deoxy-4-formamido-L-arabinose transferase	Escherichia coli BL21-AI	5	5	5	11	24.8724	15	7			20.4379		19.481																						20.4224	20.0231	19.6471	21.6591	21.2884	22.7311	21.8067	21.5039	19.3529	20.1599
gi|1790040897|gb|QHB86610.1|	gi|1790040897|gb|QHB86610.1|	1790040897	QHB86610.1	NAD-dependent epimerase/dehydratase family protein	Escherichia coli BL21-AI	5	5	5	16	24.8668	20	12			19.779		19.5087				17.6184																		18.8635	19.7264	19.9426	20.5836	20.6596	21.2015	22.2761	20.9391	17.8695	20.4129	19.4
gi|1790042426|gb|QHB88139.1|	gi|1790042426|gb|QHB88139.1|	1790042426	QHB88139.1	heat shock chaperone IbpB	Escherichia coli BL21-AI	1	1	1	8	24.8565	20	12			20.6213		20.1663				20.2933																		20.0502	20.519	20.429	21.4871	20.7467	19.9135	20.8628	20.2228	19.9971	19.9971	20.2812
gi|1790041200|gb|QHB86913.1|	gi|1790041200|gb|QHB86913.1|	1790041200	QHB86913.1	D-serine ammonia-lyase	Escherichia coli BL21-AI	9	9	9	20	24.8386	28	19		17.7427	20.2816		19.4562				18.1567				14.7593		15.6336		15.9469									17.7427	19.9805	19.8473	20.2766	21.0222	21.068	21.6128	21.0441	20.1784	18.2003	20.6637	18.4933
gi|1790041347|gb|QHB87060.1|	gi|1790041347|gb|QHB87060.1|	1790041347	QHB87060.1	tRNA (cytosine(32)/uridine(32)-2-O)-methyltransferase TrmJ	Escherichia coli BL21-AI	4	4	4	11	24.832	23	15			20.0596		19.9148				18.6459		15.737		16.2944														17.4477	19.7365	21.0666	21.9878	20.1254	21.7954	20.1286	20.6155	18.5143	20.8868	19.1078
gi|1790040127|gb|QHB85840.1|	gi|1790040127|gb|QHB85840.1|	1790040127	QHB85840.1	glutaredoxin 2	Escherichia coli BL21-AI	3	3	3	12	24.8242	18	10			20.9409		19.6423										16.2584												20.273	20.7763	21.0238	21.6904	19.0923	21.6885	21.4831	19.8909	19.538	20.0422	18.7937
gi|1790040086|gb|QHB85799.1|	gi|1790040086|gb|QHB85799.1|	1790040086	QHB85799.1	trifunctional transcriptional regulator/proline dehydrogenase/L-glutamate gamma-semialdehyde dehydrogenase	Escherichia coli BL21-AI	22	22	22	62	24.8107	21	13			19.427		19.3039				17.5937						14.0782												18.8126	18.5875	20.2016	20.1062	20.9423	21.836	22.7053	20.1922	18.9853	20.2682	17.8024
gi|1790040916|gb|QHB86629.1|	gi|1790040916|gb|QHB86629.1|	1790040916	QHB86629.1	aminotransferase class I/II-fold pyridoxal phosphate-dependent enzyme	Escherichia coli BL21-AI	5	5	5	17	24.7906	14	6			20.3447		19.9474																						20.097	19.4196		21.5176	21.1174	21.7868	22.0663	19.3591	19.4806	20.1509
gi|1790042225|gb|QHB87938.1|	gi|1790042225|gb|QHB87938.1|	1790042225	QHB87938.1	dipeptide/tripeptide permease DtpB	Escherichia coli BL21-AI	1	1	1	12	24.7411	21	11		18.0574	20.6802		20.063				18.8257															19.0462	17.0685		19.231	22.1352	20.3483	21.0061	20.6204	21.5133	21.258	20.8632	19.5097	20.9635	19.8158
gi|1790041250|gb|QHB86963.1|	gi|1790041250|gb|QHB86963.1|	1790041250	QHB86963.1	SDR family oxidoreductase UcpA	Escherichia coli BL21-AI	4	4	4	16	24.727	18	10			19.8059		20.3191				17.8707																		19.2761	19.7547	19.3608	20.8319	20.5227	21.2647	21.8476	20.7792	18.9681	21.2322	20.3927
gi|1790041465|gb|QHB87178.1|	gi|1790041465|gb|QHB87178.1|	1790041465	QHB87178.1	recombinase RecA	Escherichia coli BL21-AI	7	7	7	18	24.7071	19	11			19.0975		19.2877				17.4356																		18.1386	17.6239	20.5165	20.111	20.0088	22.0468	22.1448	19.0992	17.6149	20.4263	19.317
gi|1790042823|gb|QHB88536.1|	gi|1790042823|gb|QHB88536.1|	1790042823	QHB88536.1	phosphoethanolamine transferase EptA	Escherichia coli BL21-AI	3	3	3	19	24.6929	17	10			20.823		19.664				17.879																		19.7445	21.029	21.1693	21.3493	21.3498	21.5857	21.8653	20.9712	19.8063	20.3352	18.5423
gi|1790039882|gb|QHB85595.1|	gi|1790039882|gb|QHB85595.1|	1790039882	QHB85595.1	molybdopterin molybdotransferase MoeA	Escherichia coli BL21-AI	5	5	5	16	24.6873	18	10			19.7883		19.6727				17.093																		19.4146	18.6289	20.6766	20.4331	20.928	21.6759	22.528	20.4422	19.6286	20.1457	18.6615
gi|1790042763|gb|QHB88476.1|	gi|1790042763|gb|QHB88476.1|	1790042763	QHB88476.1	NADPH:quinone reductase	Escherichia coli BL21-AI	7	7	7	19	24.6842	20	12			19.8395		19.8024				19.2794																		20.2474	17.5327	20.2549	21.3232	20.8268	20.4489	21.1216	20.0258	19.9766	20.0009	19.1747
gi|1790041807|gb|QHB87520.1|	gi|1790041807|gb|QHB87520.1|	1790041807	QHB87520.1	bifunctional D-glycero-beta-D-manno-heptose-7-phosphate kinase/D-glycero-beta-D-manno-heptose 1-phosphate adenylyltransferase HldE	Escherichia coli BL21-AI	7	7	7	27	24.6792	23	14		18.7454	19.184		19.437		18.6125		18.9573														18.7454				17.3219	18.7995	19.7228	20.8919	19.5434	21.8454	22.0738	19.4876	18.2533	20.2912	18.3776
gi|1790039716|gb|QHB85429.1|	gi|1790039716|gb|QHB85429.1|	1790039716	QHB85429.1	D-alanyl-D-alanine carboxypeptidase DacA	Escherichia coli BL21-AI	9	9	9	25	24.6749	19	10		16.6559	20.1699		20.2842				17.7541																16.6559		19.9235	19.6627	19.5016	21.5918	20.358	21.7277	20.5527	19.7982		20.5409
gi|1790042581|gb|QHB88294.1|	gi|1790042581|gb|QHB88294.1|	1790042581	QHB88294.1	NAD(P)H-flavin reductase	Escherichia coli BL21-AI	2	2	2	15	24.6722	18	10			20.2459		19.7063				18.6923																		18.8383		20.9047	20.9947	20.7844	20.802	21.2473	20.5156	19.2711	20.2118	19.804
gi|1790040790|gb|QHB86503.1|	gi|1790040790|gb|QHB86503.1|	1790040790	QHB86503.1	DNA-binding transcriptional regulator KdgR	Escherichia coli BL21-AI	5	5	5	18	24.6569	19	11			20.5747		20.2099				18.02																		19.4897	20.4263	20.7534	21.6293	19.5154	21.2274	18.1772	19.5623	20.1478	20.747	19.348
gi|1790041584|gb|QHB87297.1|	gi|1790041584|gb|QHB87297.1|	1790041584	QHB87297.1	thymidylate synthase	Escherichia coli BL21-AI	5	5	5	10	24.6562	18	10			19.4114		18.1639				19.2419						17.5889												20.6271	18.1914	18.7439	20.0833	19.3952	22.3987	21.8673	19.194		18.8169	17.5109
gi|1790039994|gb|QHB85707.1|	gi|1790039994|gb|QHB85707.1|	1790039994	QHB85707.1	3-deoxy-manno-octulosonate cytidylyltransferase	Escherichia coli BL21-AI	5	5	5	17	24.6512	21	13			19.9856		19.2594				19.2189						15.7176												18.7956	20.3286	20.2865	20.5316	20.1843	21.3245	21.1527	20.9526	18.4058	19.8189	19.4014
gi|1790042156|gb|QHB87869.1|	gi|1790042156|gb|QHB87869.1|	1790042156	QHB87869.1	glycerol-3-phosphate dehydrogenase	Escherichia coli BL21-AI	8	8	8	31	24.6464	19	11			20.094		19.2569				16.5737																		19.0846	20.0856	19.9009	21.3047	19.6471	21.35	21.3636	20.4777	18.2234	20.1456	19.1945
gi|1790041171|gb|QHB86884.1|	gi|1790041171|gb|QHB86884.1|	1790041171	QHB86884.1	tRNA pseudouridine(38-40) synthase TruA	Escherichia coli BL21-AI	6	6	6	17	24.6396	19	11			19.2599		18.5236				17.6056																		19.7719	19.3126	17.5706	20.3844	20.0057	21.6524	22.1836	20.0325	18.6081	18.5556	18.3327
gi|1790039892|gb|QHB85605.1|	gi|1790039892|gb|QHB85605.1|	1790039892	QHB85605.1	serine-type D-Ala-D-Ala carboxypeptidase	Escherichia coli BL21-AI	3	3	3	24	24.6145	11	6			19.779						19.3772																		21.3863	22.5296	17.4226	17.7774			18.5254	22.3712
gi|1790040713|gb|QHB86426.1|	gi|1790040713|gb|QHB86426.1|	1790040713	QHB86426.1	exodeoxyribonuclease III	Escherichia coli BL21-AI	4	4	4	17	24.5842	13	5			19.197		19.2054																								18.7458	19.6481	18.9901	21.7386	21.8962	19.428		18.968	18.6286
gi|1790040727|gb|QHB86440.1|	gi|1790040727|gb|QHB86440.1|	1790040727	QHB86440.1	selenide, water dikinase SelD	Escherichia coli BL21-AI	5	5	5	19	24.5628	19	11			19.5772		19.152				18.0946																		17.813	18.5233	21.5185	20.4538	18.3033	21.1218	22.9346	20.7403	18.2712	19.4293	19.6068
gi|1790039959|gb|QHB85672.1|	gi|1790039959|gb|QHB85672.1|	1790039959	QHB85672.1	ATP-dependent Clp protease ATP-binding subunit ClpA	Escherichia coli BL21-AI	10	10	10	42	24.5309	20	12			19.832		20.069				18.6694																		19.2526	19.3868	19.9902	20.6983	19.6742	21.3595	20.1614	20.5329	20.0098	20.3875	19.5821
gi|1790040857|gb|QHB86570.1|	gi|1790040857|gb|QHB86570.1|	1790040857	QHB86570.1	L-arabinose ABC transporter ATP-binding protein AraG	Escherichia coli BL21-AI	8	8	8	24	24.5077	15	7			19.6676		18.6362																						18.2188		19.8809	20.9032	20.3914	20.8353	21.9831	18.4764	16.8267	19.5805	18.6276
gi|1790041841|gb|QHB87554.1|	gi|1790041841|gb|QHB87554.1|	1790041841	QHB87554.1	Gfo/Idh/MocA family oxidoreductase	Escherichia coli BL21-AI	5	5	5	10	24.5018	24	16			19.9567		18.8295				18.0625						16.4288		16.7259										20.3094	19.4135	19.7493	20.3547	20.4903	21.9719	21.1456	19.9485	18.2676	19.003	18.3772
gi|1790039519|gb|QHB85232.1|	gi|1790039519|gb|QHB85232.1|	1790039519	QHB85232.1	thiamine-phosphate kinase	Escherichia coli BL21-AI	5	5	5	15	24.4885	7	3					18.8381																															19.4738	17.6938
gi|1790040898|gb|QHB86611.1|	gi|1790040898|gb|QHB86611.1|	1790040898	QHB86611.1	ATP phosphoribosyltransferase	Escherichia coli BL21-AI	5	5	5	16	24.4809	7	3					19.6323																															19.4657	18.7018
gi|1790042032|gb|QHB87745.1|	gi|1790042032|gb|QHB87745.1|	1790042032	QHB87745.1	preprotein translocase subunit SecY	Escherichia coli BL21-AI	3	3	3	13	24.4691	18	10			20.3028		19.3935				18.9318																		19.2004	21.3552	20.0649	20.5909	20.6903	22.3009	20.1052	20.366	19.4214	20.1403	19.0756
gi|1790039257|gb|QHB84970.1|	gi|1790039257|gb|QHB84970.1|	1790039257	QHB84970.1	UDP-N-acetylmuramoyl-L-alanyl-D-glutamate--2,6-diaminopimelate ligase	Escherichia coli BL21-AI	7	7	7	23	24.4684	23	15			20.3358		19.6644								15.6843		15.4852		15.7219										18.6559	22.1555	19.3556	21.1763	19.8659	21.1581	21.165	19.3974		19.7828	19.4258
gi|1790040486|gb|QHB86199.1|	gi|1790040486|gb|QHB86199.1|	1790040486	QHB86199.1	sulfatase-like hydrolase/transferase	Escherichia coli BL21-AI	12	12	12	26	24.449	15	7		15.9966	19.1926		21.0085																		15.9966				19.0617		18.6417	19.8745	16.3108	17.2025	18.1766		21.231	21.4654	20.5065
gi|1790040258|gb|QHB85971.1|	gi|1790040258|gb|QHB85971.1|	1790040258	QHB85971.1	two-component system response regulator NarL	Escherichia coli BL21-AI	4	4	4	9	24.4471	5	2			20.5253																								20.0144			21.0362	21.531	21.1707	19.3524
gi|1790040363|gb|QHB86076.1|	gi|1790040363|gb|QHB86076.1|	1790040363	QHB86076.1	universal stress protein UspE	Escherichia coli BL21-AI	3	3	3	18	24.442	10	7			20.987		20.7393								15.4344																22.6151	19.359	19.3041	19.2495		19.328		18.6693	21.0994
gi|1790042822|gb|QHB88535.1|	gi|1790042822|gb|QHB88535.1|	1790042822	QHB88535.1	two-component system response regulator BasR	Escherichia coli BL21-AI	2	2	2	9	24.4342	18	10			19.9937		19.4579				19.1335																		19.7922	19.1999	20.4208	20.562	19.7151	21.1685	21.0144	18.7207	18.8436	19.7663	19.6109
gi|1790041330|gb|QHB87043.1|	gi|1790041330|gb|QHB87043.1|	1790041330	QHB87043.1	cytoskeleton protein RodZ	Escherichia coli BL21-AI	2	2	2	10	24.4241	16	8			20.66		19.6378																						19.848	20.6751	20.7452	21.3717	20.2814	21.217	20.7155	20.4218	19.6681	19.6478	19.4617
gi|1790041945|gb|QHB87658.1|	gi|1790041945|gb|QHB87658.1|	1790041945	QHB87658.1	3-deoxy-manno-octulosonate-8-phosphatase KdsC	Escherichia coli BL21-AI	3	3	3	8	24.4228	6	2		20.3394	20.5052																					20.3394				20.2897		20.7206	21.3635	21.7844	20.1938
gi|1790041441|gb|QHB87154.1|	gi|1790041441|gb|QHB87154.1|	1790041441	QHB87154.1	DNA-binding protein StpA	Escherichia coli BL21-AI	3	2	2	9	24.4095	9	3					22.0207																										20.7131	20.5542	20.4499			22.4335	21.467
gi|1790040227|gb|QHB85940.1|	gi|1790040227|gb|QHB85940.1|	1790040227	QHB85940.1	FAD-dependent oxidoreductase	Escherichia coli BL21-AI	8	8	8	24	24.3466	18	10			18.7675		18.8992						12.462																18.9556	16.59	20.2522	19.2722	20.0881	21.5139	21.8352	20.3628	17.4923	20.1839	17.8115
gi|1790039776|gb|QHB85489.1|	gi|1790039776|gb|QHB85489.1|	1790039776	QHB85489.1	type 2 GTP cyclohydrolase I	Escherichia coli BL21-AI	4	4	4	10	24.3454	21	15			19.7416		19.1938						16.8146				17.9286		16.9858										18.6226	17.6698	20.9012	21.7728	21.2635	19.9955	21.871	20.7813	18.9397	19.2953
gi|1790040241|gb|QHB85954.1|	gi|1790040241|gb|QHB85954.1|	1790040241	QHB85954.1	redox-regulated ATPase YchF	Escherichia coli BL21-AI	5	5	5	22	24.3076	17	9			18.3627		18.5013										15.9582												16.4696		20.634	17.9844	19.3852	21.2903	22.4783	20.2946	16.9057	19.8126	18.0379
gi|1790042018|gb|QHB87731.1|	gi|1790042018|gb|QHB87731.1|	1790042018	QHB87731.1	peptide deformylase	Escherichia coli BL21-AI	4	4	4	8	24.2582	11	4			20.4237		19.8304																						20.8026			20.0447	20.3318	22.1987	21.1958			20.5519	19.109
gi|1790041927|gb|QHB87640.1|	gi|1790041927|gb|QHB87640.1|	1790041927	QHB87640.1	23S rRNA (uridine(2552)-2-O)-methyltransferase RlmE	Escherichia coli BL21-AI	2	2	2	10	24.2561	12	5			19.7146		20.7159																							20.5204	20.4723	18.151	20.2549	21.1959	21.0644				20.8667
gi|1790040412|gb|QHB86125.1|	gi|1790040412|gb|QHB86125.1|	1790040412	QHB86125.1	aldehyde dehydrogenase	Escherichia coli BL21-AI	7	7	7	28	24.23	20	12			19.3957		20.3147				18.7429																		18.9159	18.5502	19.9851	20.1318	19.6536	19.567	19.4312	19.4577	20.6827	20.2723	19.9405
gi|1790042659|gb|QHB88372.1|	gi|1790042659|gb|QHB88372.1|	1790042659	QHB88372.1	septal ring assembly protein ZapB	Escherichia coli BL21-AI	1	1	1	5	24.226	8	2					20.4056																										21.1774	21.1309	21.77	21.6724		20.2532
gi|1790041985|gb|QHB87698.1|	gi|1790041985|gb|QHB87698.1|	1790041985	QHB87698.1	metalloprotease TldD	Escherichia coli BL21-AI	3	3	3	21	24.2252	20	12			19.3884		19.1121				17.6499																		18.4329	19.0542	19.916	20.1504	20.1877	20.5535	20.9051	19.2513	18.7851	18.7608	18.9544
gi|1790042147|gb|QHB87860.1|	gi|1790042147|gb|QHB87860.1|	1790042147	QHB87860.1	4-alpha-glucanotransferase	Escherichia coli BL21-AI	9	9	9	32	24.2246	15	7			17.3264		16.8308										13.7066												16.2861		18.0731	17.6201	20.3891	21.7974	22.388	20.5964		16.9496
gi|1790039403|gb|QHB85116.1|	gi|1790039403|gb|QHB85116.1|	1790039403	QHB85116.1	glutamate-5-semialdehyde dehydrogenase	Escherichia coli BL21-AI	11	11	11	26	24.204	17	9			18.372		18.6681				18.3133																		18.0284			18.7156	19.9345	20.6528	23.0311	18.5835	17.2982	19.8308	17.2417
gi|1790039536|gb|QHB85249.1|	gi|1790039536|gb|QHB85249.1|	1790039536	QHB85249.1	cytochrome o ubiquinol oxidase subunit I	Escherichia coli BL21-AI	2	2	2	13	24.2018	12	8			21.5757		19.7693				19.4848																			22.5303	20.6644	21.5323	19.699	21.299				19.7133
gi|1790041978|gb|QHB87691.1|	gi|1790041978|gb|QHB87691.1|	1790041978	QHB87691.1	transcriptional regulator ArgR	Escherichia coli BL21-AI	1	1	1	6	24.1754	2	2																	17.9579
gi|1790041713|gb|QHB87426.1|	gi|1790041713|gb|QHB87426.1|	1790041713	QHB87426.1	hypothetical protein GSU80_14175	Escherichia coli BL21-AI	4	4	4	17	24.1705	19	11			19.3242		18.729				17.5487																		18.0632	19.0789	19.5527	20.6019	19.8347	21.1948	21.5918	20.3151	18.2693	19.3592	18.4243
gi|1790039543|gb|QHB85256.1|	gi|1790039543|gb|QHB85256.1|	1790039543	QHB85256.1	ATP-dependent protease ATP-binding subunit ClpX	Escherichia coli BL21-AI	5	5	5	26	24.1679	16	8			18.8549		19.4109				17.9823																		17.9762		18.3203	20.2681	20.0203	20.7471	21.9049	19.6195		20.206	18.3201
gi|1790042440|gb|QHB88153.1|	gi|1790042440|gb|QHB88153.1|	1790042440	QHB88153.1	DNA polymerase III subunit beta	Escherichia coli BL21-AI	6	6	6	15	24.1554	16	8			18.8053		19.3329				18.2908																		18.7874		18.1123	19.5162	20.5443	21.7205	22.2913	19.9508		19.6078	19.3344
gi|1790042724|gb|QHB88437.1|	gi|1790042724|gb|QHB88437.1|	1790042724	QHB88437.1	bifunctional phosphoribosylaminoimidazolecarboxamide formyltransferase/IMP cyclohydrolase	Escherichia coli BL21-AI	2	2	2	31	24.1462	8	2	20.764	20.1677					20.4675	0.814223											20.8755		20.6525		20.4698			19.8657					20.7099			21.3228
gi|1790040980|gb|QHB86693.1|	gi|1790040980|gb|QHB86693.1|	1790040980	QHB86693.1	iron-sulfur cluster carrier protein ApbC	Escherichia coli BL21-AI	4	4	4	15	24.1447	15	7			19.4443		19.2566																						19.0721		18.7536	20.5072	20.0389	21.1016	20.6671	20.4241	17.8948	20.4784	18.736
gi|1790039739|gb|QHB85452.1|	gi|1790039739|gb|QHB85452.1|	1790039739	QHB85452.1	rRNA maturation RNase YbeY	Escherichia coli BL21-AI	1	1	1	4	24.1427	7	3			20.4886																								19.6963		21.0325	20.737	20.0261	20.7489	22.128	20.1011
gi|1790041419|gb|QHB87132.1|	gi|1790041419|gb|QHB87132.1|	1790041419	QHB87132.1	signal recognition particle protein	Escherichia coli BL21-AI	8	8	8	23	24.1264	19	11			19.9231		19.198				17.8468																		17.8373	19.9742	20.9286	20.9523	18.5758	20.4282	20.5632	18.3391	17.7787	20.3249	18.4608
gi|1790041098|gb|QHB86811.1|	gi|1790041098|gb|QHB86811.1|	1790041098	QHB86811.1	glycerol-3-phosphate dehydrogenase subunit GlpB	Escherichia coli BL21-AI	2	2	2	16	24.1145	18	10			19.1773		18.4858				17.7815																		18.2687	18.3603	19.5117	20.5684	19.7823	20.9687	21.294	19.9448	17.7458	19.6593	16.9811
gi|1790042438|gb|QHB88151.1|	gi|1790042438|gb|QHB88151.1|	1790042438	QHB88151.1	DNA topoisomerase (ATP-hydrolyzing) subunit B	Escherichia coli BL21-AI	12	12	12	41	24.1045	19	11			18.7951		18.7093				17.1531																		17.3487		19.6519	19.3847	19.5747	21.5225	22.0305	19.5971	17.6787	20.2434	17.8564
gi|1790040508|gb|QHB86221.1|	gi|1790040508|gb|QHB86221.1|	1790040508	QHB86221.1	succinate-semialdehyde dehydrogenase	Escherichia coli BL21-AI	7	7	7	24	24.0931	16	8			18.0633		18.5354										15.3746												17.7273		17.7493	18.7134	20.7841	21.7102	21.7792	20.7858		18.6442
gi|1790042925|gb|QHB88638.1|	gi|1790042925|gb|QHB88638.1|	1790042925	QHB88638.1	peptide-methionine (S)-S-oxide reductase MsrA	Escherichia coli BL21-AI	1	1	1	9	24.0696	15	8			19.7376		19.0855																						18.7917	19.038	20.6156	20.505	20.0794	20.2952	21.3081	20.4045	18.6642	19.3449	19.0798
gi|1790041809|gb|QHB87522.1|	gi|1790041809|gb|QHB87522.1|	1790041809	QHB87522.1	CYTH domain-containing protein	Escherichia coli BL21-AI	5	5	5	21	24.0645	18	10			19.4169		18.6554				17.4668																		18.84	19.2638	19.4505	20.1132	19.7197	21.7862	21.4517	19.9224	17.7208	19.6642	17.3136
gi|1790040612|gb|QHB86325.1|	gi|1790040612|gb|QHB86325.1|	1790040612	QHB86325.1	pyridoxamine 5-phosphate oxidase	Escherichia coli BL21-AI	5	5	5	12	24.0567	17	9			19.8033		19.2521		17.9821																				19.5156	19.6665	20.6504	19.3805	21.2285	20.2702	21.4611	20.273	19.4635	18.6987
gi|1790040165|gb|QHB85878.1|	gi|1790040165|gb|QHB85878.1|	1790040165	QHB85878.1	purine nucleoside phosphoramidase	Escherichia coli BL21-AI	2	2	2	7	24.0405	10	2			19.7472																									20.1121	19.3822		20.2566	20.4694	20.5996	19.8723
gi|1790041012|gb|QHB86725.1|	gi|1790041012|gb|QHB86725.1|	1790041012	QHB86725.1	NAD-dependent dihydropyrimidine dehydrogenase subunit PreT	Escherichia coli BL21-AI	7	7	7	23	24.0073	15	7			18.4554		18.5444						15.1621																17.4336		19.0225	18.9101	18.9637	21.1978	22.6178	18.6464		18.4302
gi|1790039264|gb|QHB84977.1|	gi|1790039264|gb|QHB84977.1|	1790039264	QHB84977.1	D-alanine--D-alanine ligase	Escherichia coli BL21-AI	6	6	6	15	23.9947	7	4			19.1222																								17.7586	19.178	19.2097	20.3423	19.6455	21.0889	21.0487
gi|1790042372|gb|QHB88085.1|	gi|1790042372|gb|QHB88085.1|	1790042372	QHB88085.1	orotate phosphoribosyltransferase	Escherichia coli BL21-AI	7	7	7	13	23.9848	13	5			20.2952		19.7592																						21.1419	18.1014		21.6422	19.9138	21.3138	20.1393	20.1015		19.5725
gi|1790039693|gb|QHB85406.1|	gi|1790039693|gb|QHB85406.1|	1790039693	QHB85406.1	alkyl hydroperoxide reductase subunit F	Escherichia coli BL21-AI	7	7	7	27	23.9631	18	9		16.3914	19.0053		18.7785				17.3025																	16.3914	17.9099	18.4807	19.5258	20.1047	19.6867	20.6839	22.0691	18.406		19.5666	17.7056
gi|1790041381|gb|QHB87094.1|	gi|1790041381|gb|QHB87094.1|	1790041381	QHB87094.1	ribonuclease III	Escherichia coli BL21-AI	3	3	3	14	23.9544	19	11			19.7062		18.6148				17.558																		18.5995	19.4771	20.3746	20.3737	19.2332	20.5793	21.1143	18.7275	17.0405	19.3457	18.5138
gi|1790041348|gb|QHB87061.1|	gi|1790041348|gb|QHB87061.1|	1790041348	QHB87061.1	inositol-1-monophosphatase	Escherichia coli BL21-AI	3	3	3	18	23.928	14	6			19.9902		19.9145																						19.2591		19.6003	21.1111	20.1116	20.2421	20.9464	19.0629	19.1761	19.8328
gi|1790041899|gb|QHB87612.1|	gi|1790041899|gb|QHB87612.1|	1790041899	QHB87612.1	DnaA initiator-associating protein DiaA	Escherichia coli BL21-AI	2	2	2	9	23.9261	10	5			19.5495		18.5533																						18.9684			20.1307	19.1126	20.2354	21.2545		17.2261	19.2186
gi|1790041910|gb|QHB87623.1|	gi|1790041910|gb|QHB87623.1|	1790041910	QHB87623.1	LLM class flavin-dependent oxidoreductase	Escherichia coli BL21-AI	5	5	5	13	23.9254	19	11			19.578		18.8902				18.0695																		18.2881	19.3878	20.5093	20.1267	18.2298	20.2767	19.293	18.4968	17.6208	18.4621	19.8152
gi|1790042159|gb|QHB87872.1|	gi|1790042159|gb|QHB87872.1|	1790042159	QHB87872.1	glycogen phosphorylase	Escherichia coli BL21-AI	9	9	9	39	23.9114	20	11		19.9603	18.4181		17.654				17.6297															19.9603				16.5383	19.6501	19.0659	18.4791	20.1739	19.4067	18.8741	16.75	19.5408	16.4199
gi|1790039535|gb|QHB85248.1|	gi|1790039535|gb|QHB85248.1|	1790039535	QHB85248.1	cytochrome o ubiquinol oxidase subunit III	Escherichia coli BL21-AI	2	2	2	3	23.9088	6	6			21.675		19.8244																							22.4897	20.9688	21.5666					19.5163	20.7332
gi|1790040269|gb|QHB85982.1|	gi|1790040269|gb|QHB85982.1|	1790040269	QHB85982.1	UTP--glucose-1-phosphate uridylyltransferase GalU	Escherichia coli BL21-AI	2	2	2	16	23.8812	18	10			19.6515		19.1828				17.9698																			18.7159	20.1549	20.0837	19.2966	20.1015	20.7421	20.34	18.2037	19.7934	19.2107
gi|1790039589|gb|QHB85302.1|	gi|1790039589|gb|QHB85302.1|	1790039589	QHB85302.1	glutaminase A	Escherichia coli BL21-AI	1	1	1	10	23.8796	6	4			19.5061				21.3383																				19.1457			19.8664		19.8463	21.933
gi|1790042383|gb|QHB88096.1|	gi|1790042383|gb|QHB88096.1|	1790042383	QHB88096.1	sodium/glutamate symporter	Escherichia coli BL21-AI	1	1	1	11	23.8635	11	7		20.1856	20.1574		20.2177				19.8378															20.1856			19.4014	20.7927		20.2781	21.2349		20.5711	20.2069	19.1615	21.274
gi|1790041935|gb|QHB87648.1|	gi|1790041935|gb|QHB87648.1|	1790041935	QHB87648.1	octaprenyl diphosphate synthase	Escherichia coli BL21-AI	3	3	3	13	23.7767	13	5			19.2483		19.5434																						19.2135	19.2831			19.7586	20.2306	19.5556	19.8132	18.8254	19.8574
gi|1790039942|gb|QHB85655.1|	gi|1790039942|gb|QHB85655.1|	1790039942	QHB85655.1	arginine ABC transporter ATP-binding protein ArtP	Escherichia coli BL21-AI	1	1	1	6	23.7723	6	4															17.9321		17.8017															21.77	20.8654
gi|1790042960|gb|QHB88673.1|	gi|1790042960|gb|QHB88673.1|	1790042960	QHB88673.1	leucyl aminopeptidase	Escherichia coli BL21-AI	5	5	5	28	23.7715	22	14			18.1544		18.4156				17.5526						14.7229		13.8359										16.0725	17.6373	19.4637	19.4442	20.3325	21.1461	21.5285	20.3771		18.2112	18.3359
gi|1790040724|gb|QHB86437.1|	gi|1790040724|gb|QHB86437.1|	1790040724	QHB86437.1	NADP-specific glutamate dehydrogenase	Escherichia coli BL21-AI	8	8	8	25	23.7656	32	24			18.2659		18.2359						16.3331		15.7176		17.7431		16.3653										17.4755	16.8671	19.4284	19.2924	19.9859	20.5065	21.2008	19.5931	18.2634	18.0958	17.8324
gi|1790040147|gb|QHB85860.1|	gi|1790040147|gb|QHB85860.1|	1790040147	QHB85860.1	ribonuclease E	Escherichia coli BL21-AI	17	17	17	44	23.7545	21	12		15.2854	18.2213		18.139				15.045						15.5997											15.2854	18.3897	16.4249	18.0051	20.0657	19.147	20.3129	21.4114	18.1853	15.0942	19.1702	18.365
gi|1790039254|gb|QHB84967.1|	gi|1790039254|gb|QHB84967.1|	1790039254	QHB84967.1	16S rRNA (cytosine(1402)-N(4))-methyltransferase RsmH	Escherichia coli BL21-AI	3	3	3	14	23.7395	14	7			18.663		18.6922																						18.1825	18.749	18.7181	19.0025		20.2019	20.9569	18.3959		18.9243	18.0994
gi|1790039526|gb|QHB85239.1|	gi|1790039526|gb|QHB85239.1|	1790039526	QHB85239.1	protein deglycase YajL	Escherichia coli BL21-AI	1	1	1	8	23.7361	9	5			19.9105						18.8711																		19.3692		20.4519		20.2053	20.5189	20.9008	19.6321
gi|1790040900|gb|QHB86613.1|	gi|1790040900|gb|QHB86613.1|	1790040900	QHB86613.1	histidinol-phosphate transaminase	Escherichia coli BL21-AI	4	4	4	21	23.707	16	8		20.6437	19.3675		18.3392				18.9086																	20.6437	19.1458		21.0808	17.8759	18.0748	19.5187	19.9476			17.9939	17.7526
gi|1790042654|gb|QHB88367.1|	gi|1790042654|gb|QHB88367.1|	1790042654	QHB88367.1	universal stress protein UspD	Escherichia coli BL21-AI	2	2	2	4	23.7061	8	6													16.7893		17.8946		17.5571
gi|1790041688|gb|QHB87401.1|	gi|1790041688|gb|QHB87401.1|	1790041688	QHB87401.1	pyridoxal phosphate homeostasis protein	Escherichia coli BL21-AI	3	3	3	13	23.6974	15	7			18.9126		18.5764																						19.4641	17.114	18.4222	20.6503	20.1691	20.3809	19.8125	18.8756		19.5873	17.4927
gi|1790042597|gb|QHB88310.1|	gi|1790042597|gb|QHB88310.1|	1790042597	QHB88310.1	YihA family ribosome biogenesis GTP-binding protein	Escherichia coli BL21-AI	2	2	2	11	23.6847	16	8			18.6408		18.1728				17.8906																		19.3614	17.9201			20.2636	20.5429	19.3447	19.6681	17.9427	18.6016	17.5763
gi|1790043141|gb|QHB88854.1|	gi|1790043141|gb|QHB88854.1|	1790043141	QHB88854.1	bifunctional indole-3-glycerol-phosphate synthase TrpC/phosphoribosylanthranilate isomerase TrpF	Escherichia coli BL21-AI	7	7	7	26	23.6674	13	6			18.8719		18.8115																						17.3036		18.6376	20.6744	20.0703	20.4647	21.6225	20.3244		19.6075	18.9119
gi|1790040298|gb|QHB86011.1|	gi|1790040298|gb|QHB86011.1|	1790040298	QHB86011.1	YciK family oxidoreductase	Escherichia coli BL21-AI	3	3	3	14	23.662	19	11			18.5935		19.4298				18.3801																		17.4595	17.9934	19.2251	19.6959	19.0711	19.807	20.3911	19.4853	18.339	19.5277	20.4395
gi|1790042691|gb|QHB88404.1|	gi|1790042691|gb|QHB88404.1|	1790042691	QHB88404.1	DNA-binding transcriptional regulator OxyR	Escherichia coli BL21-AI	2	2	2	16	23.6415	14	6			18.2657		18.236																						17.0999		19.6778	18.0193	19.2382	20.7038	21.9908	19.3458	16.7969	18.9494
gi|1790040576|gb|QHB86289.1|	gi|1790040576|gb|QHB86289.1|	1790040576	QHB86289.1	Re/Si-specific NAD(P)(+) transhydrogenase subunit beta	Escherichia coli BL21-AI	5	5	5	13	23.6349	16	11		17.5801	20.0058		19.1502		16.7808		18.1145															17.5801			19.2022	19.1019	19.8408	21.8782	19.651	20.7503	20.1211	18.9998		19.6409	18.5732
gi|1790042446|gb|QHB88159.1|	gi|1790042446|gb|QHB88159.1|	1790042446	QHB88159.1	tRNA uridine-5-carboxymethylaminomethyl(34) synthesis GTPase MnmE	Escherichia coli BL21-AI	3	3	3	25	23.5989	16	8			18.9159		18.5982				17.313																		17.6995	19.1823	19.1915	19.5905	19.1213	19.9589	20.1779	19.1659		19.5827
gi|1790042120|gb|QHB87833.1|	gi|1790042120|gb|QHB87833.1|	1790042120	QHB87833.1	3-dehydroquinate synthase	Escherichia coli BL21-AI	4	4	4	19	23.5988	16	8			18.1424		19.228				16.9804																		18.1252	15.8267	19.415	19.2026	15.6557	21.2892	21.6373	16.5449		19.2553
gi|1790041316|gb|QHB87029.1|	gi|1790041316|gb|QHB87029.1|	1790041316	QHB87029.1	exopolyphosphatase	Escherichia coli BL21-AI	9	9	9	29	23.594	16	8			19.1305		17.1593																						18.3992	19.2355	19.3393	19.5479	17.813	20.114	21.188	19.0746	12.712	19.6798	17.9246
gi|1790039227|gb|QHB84940.1|	gi|1790039227|gb|QHB84940.1|	1790039227	QHB84940.1	16S rRNA (adenine(1518)-N(6)/adenine(1519)-N(6))-dimethyltransferase RsmA	Escherichia coli BL21-AI	2	2	2	13	23.5792	16	8			18.6674		18.7435																						17.5354	18.5613	19.3742	19.1986	19.9015	19.3425	20.0366	19.3753	17.415	20.7802	17.9421
gi|1790042935|gb|QHB88648.1|	gi|1790042935|gb|QHB88648.1|	1790042935	QHB88648.1	UDP-N-acetylmuramate:L-alanyl-gamma-D-glutamyl-meso-diaminopimelate ligase	Escherichia coli BL21-AI	4	4	4	23	23.5427	18	10			18.6457		17.3927				16.4663																		17.4495	17.5356	18.9671	20.6304	19.6968	19.7821	21.5585	19.9703	17.6463	18.4273	16.6618
gi|1790041130|gb|QHB86843.1|	gi|1790041130|gb|QHB86843.1|	1790041130	QHB86843.1	NADH-quinone oxidoreductase subunit M	Escherichia coli BL21-AI	2	2	2	4	23.542	8	4			20.1799		19.1337																						19.365	20.9947			20.8395	21.5262	20.8998	20.458	18.9898	19.2777
gi|1790041749|gb|QHB87462.1|	gi|1790041749|gb|QHB87462.1|	1790041749	QHB87462.1	bifunctional glutathionylspermidine amidase/synthase	Escherichia coli BL21-AI	3	3	3	31	23.5098	21	13			18.9893		18.5791		15.0742		17.3648																		18.2899	18.1683	19.5197	19.9794	19.8208	19.8434	20.7676	19.1861	16.7589	19.0123	19.5417
gi|1790041226|gb|QHB86939.1|	gi|1790041226|gb|QHB86939.1|	1790041226	QHB86939.1	nucleoside permease NupC	Escherichia coli BL21-AI	3	3	3	15	23.5019	14	8			19.6648		18.4386				17.6715																			20.798	17.8287	20.3676	19.9978	21.0374	20.4144	20.3286	18.4158	19.0916
gi|1790042218|gb|QHB87931.1|	gi|1790042218|gb|QHB87931.1|	1790042218	QHB87931.1	HlyD family efflux transporter periplasmic adaptor subunit	Escherichia coli BL21-AI	2	2	2	25	23.4892	14	6			18.3712		19.7178																							14.7226	20.0517	20.3392	19.8208	16.5075	20.0321	18.8966	19.0081	19.8677	20.2775
gi|1790041096|gb|QHB86809.1|	gi|1790041096|gb|QHB86809.1|	1790041096	QHB86809.1	glycerol-3-phosphate transporter	Escherichia coli BL21-AI	3	3	3	14	23.4746	20	11		16.4901	19.0179		18.7695				17.0923															16.4901			17.7209	20.1196	19.0717	19.1596	19.4086	20.7067	19.8531	20.5459	18.0312	19.1397	18.599
gi|1790041471|gb|QHB87184.1|	gi|1790041471|gb|QHB87184.1|	1790041471	QHB87184.1	sorbitol-6-phosphate dehydrogenase	Escherichia coli BL21-AI	5	5	5	12	23.4561	6	3			19.4333																								18.3169		19.0194	20.9636	21.1161	19.8794	20.5921
gi|1790041896|gb|QHB87609.1|	gi|1790041896|gb|QHB87609.1|	1790041896	QHB87609.1	16S rRNA (cytidine(1402)-2-O)-methyltransferase	Escherichia coli BL21-AI	3	3	3	17	23.4453	14	6			19.6071		17.689																								18.5653	20.649	18.3528	20.8773	21.3223	19.8396	15.4896	18.7472	17.6492
gi|1790039369|gb|QHB85082.1|	gi|1790039369|gb|QHB85082.1|	1790039369	QHB85082.1	LysR family transcriptional regulator	Escherichia coli BL21-AI	5	5	5	18	23.4201	16	8			18.8532		18.2992																						17.8756	18.491	19.116	19.9302	17.3685	20.2565	20.2184	17.4067	17.3212	19.6568	17.5981
gi|1790039525|gb|QHB85238.1|	gi|1790039525|gb|QHB85238.1|	1790039525	QHB85238.1	tRNA 4-thiouridine(8) synthase ThiI	Escherichia coli BL21-AI	2	2	2	28	23.4185	6	2					19.2828																															18.9456
gi|1790040187|gb|QHB85900.1|	gi|1790040187|gb|QHB85900.1|	1790040187	QHB85900.1	cupin domain-containing protein	Escherichia coli BL21-AI	1	1	1	11	23.3594	6	2			19.1681																									18.9434		19.3928	19.0683	20.5272	20.3116	19.4661
gi|1790039335|gb|QHB85048.1|	gi|1790039335|gb|QHB85048.1|	1790039335	QHB85048.1	type I methionyl aminopeptidase	Escherichia coli BL21-AI	2	2	2	17	23.3581	14	6			19.4764		19.1782																							18.3956	19.2096	20.8241	19.2978	19.2878	20.0797	18.878	19.3943	19.4291
gi|1790041666|gb|QHB87379.1|	gi|1790041666|gb|QHB87379.1|	1790041666	QHB87379.1	erythrose-4-phosphate dehydrogenase	Escherichia coli BL21-AI	4	4	4	19	23.3477	6	2					19.2295																															19.257
gi|1790039580|gb|QHB85293.1|	gi|1790039580|gb|QHB85293.1|	1790039580	QHB85293.1	ferrochelatase	Escherichia coli BL21-AI	2	2	2	15	23.3211	2	2					17.4654																															17.4879
gi|1790039738|gb|QHB85451.1|	gi|1790039738|gb|QHB85451.1|	1790039738	QHB85451.1	CNNM family magnesium/cobalt transport protein CorC	Escherichia coli BL21-AI	3	3	3	16	23.3166	13	5			18.5898		18.332																								18.7691	18.4104	18.903	19.3702	20.0772	18.9673		19.6211	15.9429
gi|1790043243|gb|QHB88956.1|	gi|1790043243|gb|QHB88956.1|	1790043243	QHB88956.1	HTH-type transcriptional repressor FabR	Escherichia coli BL21-AI	3	3	3	10	23.2967	13	6			20.592		18.7805																								20.5298	20.6542	18.2632		19.1909	19.394	17.6986	19.2466	19.1945
gi|1790041960|gb|QHB87673.1|	gi|1790041960|gb|QHB87673.1|	1790041960	QHB87673.1	hypothetical protein GSU80_15475	Escherichia coli BL21-AI	1	1	1	9	23.2624	18	10	18.1853	18.3738			19.4961	2.48096	19.7644	2.98804	19.3927	2.30926							14.9388	0.105368	17.5443	17.9813	19.0301		19.5147		17.4389	18.1677										18.5321	19.7223
gi|1790042507|gb|QHB88220.1|	gi|1790042507|gb|QHB88220.1|	1790042507	QHB88220.1	ATP-dependent RNA helicase RhlB	Escherichia coli BL21-AI	3	3	3	24	23.2591	15	7			17.7767		17.9805																						16.6359	17.2238	18.5723	18.6746	18.4377	20.4223	20.6005	18.4565	16.9131	18.386
gi|1790042501|gb|QHB88214.1|	gi|1790042501|gb|QHB88214.1|	1790042501	QHB88214.1	dihydroxy-acid dehydratase	Escherichia coli BL21-AI	7	7	7	29	23.2203	19	11			17.8292		17.121				16.2869																		17.7341	17.13	17.362	19.0907	18.9681	20.5058	21.2275	18.8612	16.318	16.2875	16.7923
gi|1790041650|gb|QHB87363.1|	gi|1790041650|gb|QHB87363.1|	1790041650	QHB87363.1	cell division protein ZapA	Escherichia coli BL21-AI	4	4	4	6	23.2081	7	2			20.1016																								19.2742			20.929	20.1112	20.1684	20.9573
gi|1790043186|gb|QHB88899.1|	gi|1790043186|gb|QHB88899.1|	1790043186	QHB88899.1	tagatose-bisphosphate aldolase subunit GatY	Escherichia coli BL21-AI	2	2	2	13	23.2042	15	8			19.3159		16.6446				17.5163																		18.8778	17.4448	20.3838	20.5572	19.0463	17.7423	21.2307		16.0467		17.2425
gi|1790040307|gb|QHB86020.1|	gi|1790040307|gb|QHB86020.1|	1790040307	QHB86020.1	GTP cyclohydrolase II	Escherichia coli BL21-AI	2	2	2	12	23.1962	6	3			19.7917																								19.0799		19.9613	20.334		19.9738	20.1132	19.6434
gi|1790041691|gb|QHB87404.1|	gi|1790041691|gb|QHB87404.1|	1790041691	QHB87404.1	RdgB/HAM1 family non-canonical purine NTP pyrophosphatase	Escherichia coli BL21-AI	2	2	2	9	23.1884	17	9			18.9216		18.6382				17.5806																		17.9719	18.8167	19.5549	19.3431	19.1731	19.0441	20.4467	19.5981		19.4302	17.8825
gi|1790041097|gb|QHB86810.1|	gi|1790041097|gb|QHB86810.1|	1790041097	QHB86810.1	anaerobic glycerol-3-phosphate dehydrogenase subunit A	Escherichia coli BL21-AI	8	8	8	31	23.1352	17	9			17.009		16.0234				15.6802																		16.2935	15.2597	18.3229	18.1598	14.4549	20.552	21.5559	19.1003	14.3015	18.0762	15.6924
gi|1790041655|gb|QHB87368.1|	gi|1790041655|gb|QHB87368.1|	1790041655	QHB87368.1	ArgP/LysG family DNA-binding transcriptional regulator	Escherichia coli BL21-AI	2	2	2	11	23.1205	15	7			18.415		18.302																						17.7005	17.9826	18.9071	19.0699	18.4402	19.7947	20.638	19.1431		18.8709	17.5781
gi|1790039567|gb|QHB85280.1|	gi|1790039567|gb|QHB85280.1|	1790039567	QHB85280.1	multidrug efflux RND transporter permease subunit	Escherichia coli BL21-AI	9	9	9	44	23.1182	19	12			19.2212		19.1709				18.2104																		18.3298	19.5331	19.2582	19.7635	19.6116	18.7847	19.5148	17.4804	19.4949	19.9197	18.3476
gi|1790040148|gb|QHB85861.1|	gi|1790040148|gb|QHB85861.1|	1790040148	QHB85861.1	23S rRNA pseudouridine(955/2504/2580) synthase RluC	Escherichia coli BL21-AI	3	3	3	20	23.1093	6	2	20.0821	19.9717			19.3723	0.611383																20.0821			19.9717										18.692		20.0526
gi|1790041315|gb|QHB87028.1|	gi|1790041315|gb|QHB87028.1|	1790041315	QHB87028.1	polyphosphate kinase 1	Escherichia coli BL21-AI	11	11	11	43	23.0918	13	6			16.0655		17.6453																						16.1121			16.019	19.3671	20.2168	19.9092		15.511	19.2707	16.1233
gi|1790043228|gb|QHB88941.1|	gi|1790043228|gb|QHB88941.1|	1790043228	QHB88941.1	bifunctional phosphopantothenoylcysteine decarboxylase/phosphopantothenate--cysteine ligase CoaBC	Escherichia coli BL21-AI	2	2	2	16	23.0911	17	9			18.5837		18.9146				17.9141																		17.9437		17.982	19.8256	18.4583	19.4958	20.1716	17.9763	18.7899	19.0027
gi|1790040555|gb|QHB86268.1|	gi|1790040555|gb|QHB86268.1|	1790040555	QHB86268.1	Zn-dependent oxidoreductase	Escherichia coli BL21-AI	1	1	1	16	23.0874	12	8	19.0482	19.3104			18.7323	0.803363	19.2041	1.11411	19.2517	1.15144										19.4882	18.6083			19.8252	18.7956										18.2504	19.377
gi|1790043009|gb|QHB88722.1|	gi|1790043009|gb|QHB88722.1|	1790043009	QHB88722.1	fructuronate reductase	Escherichia coli BL21-AI	6	6	6	23	23.0604	15	7			18.1265		17.8754																						17.5838	17.3063	18.048	19.5681	19.6509	18.8984	20.694	19.1691		18.0981	17.283
gi|1790041906|gb|QHB87619.1|	gi|1790041906|gb|QHB87619.1|	1790041906	QHB87619.1	GNAT family N-acetyltransferase	Escherichia coli BL21-AI	1	1	1	6	23.0231	4	2					20.0572																															19.6692
gi|1790042348|gb|QHB88061.1|	gi|1790042348|gb|QHB88061.1|	1790042348	QHB88061.1	2,3-bisphosphoglycerate-independent phosphoglycerate mutase	Escherichia coli BL21-AI	3	3	3	25	23.0079	17	11			18.2146		18.858				17.9309																		18.8871		17.4022	18.3544			19.3515	19.8729	18.9714	18.254	19.3341
gi|1790039875|gb|QHB85588.1|	gi|1790039875|gb|QHB85588.1|	1790039875	QHB85588.1	ABC-F family ATPase	Escherichia coli BL21-AI	6	6	6	29	23.0031	23	14		14.7054	17.8742		17.7845		14.3076		15.7004																	14.7054	16.3063	17.1976	19.1568	18.8362	16.7571	18.2941	19.0355	17.5818	16.4514	18.7018	16.4911
gi|1790041952|gb|QHB87665.1|	gi|1790041952|gb|QHB87665.1|	1790041952	QHB87665.1	RNase adapter RapZ	Escherichia coli BL21-AI	1	1	1	16	22.9895	6	3			19.0255																								18.7127		19.1734	19.1903		19.5932	19.4603	19.628
gi|1790039263|gb|QHB84976.1|	gi|1790039263|gb|QHB84976.1|	1790039263	QHB84976.1	UDP-N-acetylmuramate--L-alanine ligase	Escherichia coli BL21-AI	3	3	3	18	22.9844	10	4			20.2431														16.9945												19.479	21.0071	19.3826	19.5235	19.4432
gi|1790041750|gb|QHB87463.1|	gi|1790041750|gb|QHB87463.1|	1790041750	QHB87463.1	glutathione-dependent disulfide-bond oxidoreductase	Escherichia coli BL21-AI	3	3	3	13	22.9774	11	4		18.1121	19.744		18.8467																				18.1121		19.1057			20.3822		18.9868	19.3342			18.4373	19.2561
gi|1790042689|gb|QHB88402.1|	gi|1790042689|gb|QHB88402.1|	1790042689	QHB88402.1	acetylglutamate kinase	Escherichia coli BL21-AI	5	5	5	14	22.9671	6	3			17.6019																									17.3007	17.6523	17.8526		20.4029	20.4091	17.5594
gi|1790043132|gb|QHB88845.1|	gi|1790043132|gb|QHB88845.1|	1790043132	QHB88845.1	glucans biosynthesis protein MdoG	Escherichia coli BL21-AI	6	6	6	26	22.966	25	17			18.3123		18.1913				17.6051						15.318		14.9118										17.6431	17.9389	18.9921	18.675	18.6676	18.1438	17.5404	18.6688	17.9998	19.1883	17.265
gi|1790041963|gb|QHB87676.1|	gi|1790041963|gb|QHB87676.1|	1790041963	QHB87676.1	ROK family protein	Escherichia coli BL21-AI	3	3	3	11	22.9563	11	4			18.721		17.481																						16.9926		20.4495		19.6712	18.9522	20.3971	20.636			17.4039
gi|1790040865|gb|QHB86578.1|	gi|1790040865|gb|QHB86578.1|	1790040865	QHB86578.1	UPF0149 family protein YecA	Escherichia coli BL21-AI	1	1	1	10	22.9509	16	10			18.6168		18.7522				17.579																		17.1174	18.0875	19.4998	19.7624	18.4743	19.4935	19.3607	19.8994	18.0433	19.8072	17.8516
gi|1790042347|gb|QHB88060.1|	gi|1790042347|gb|QHB88060.1|	1790042347	QHB88060.1	rhodanese-like domain-containing protein	Escherichia coli BL21-AI	2	2	2	8	22.9439	7	3			19.9698																									21.1377	19.364	19.4078	18.4515	20.5764	18.9405	18.8446
gi|1790042599|gb|QHB88312.1|	gi|1790042599|gb|QHB88312.1|	1790042599	QHB88312.1	oxygen-independent coproporphyrinogen III oxidase	Escherichia coli BL21-AI	5	5	5	27	22.9438	13	5			18.5032		17.9664																								17.5529	19.4535	19.3815	19.6236	19.3653	17.7881		17.0273	18.3724
gi|1790041284|gb|QHB86997.1|	gi|1790041284|gb|QHB86997.1|	1790041284	QHB86997.1	ArsC family reductase	Escherichia coli BL21-AI	1	1	1	6	22.9363	9	5			19.6485		18.7857																						18.8116		19.9998	20.1341			19.6573	20.1503		18.8267
gi|1790042167|gb|QHB87880.1|	gi|1790042167|gb|QHB87880.1|	1790042167	QHB87880.1	gluconokinase	Escherichia coli BL21-AI	1	1	1	7	22.9137	4	2			19.9166																								19.2008			20.6325		20.3354	19.6875
gi|1790039576|gb|QHB85289.1|	gi|1790039576|gb|QHB85289.1|	1790039576	QHB85289.1	YbaB/EbfC family nucleoid-associated protein	Escherichia coli BL21-AI	2	2	2	7	22.9059	11	7													16.7661		17.9352		17.4138														20.3575	20.2313	20.1873	20.5488
gi|1790042529|gb|QHB88242.1|	gi|1790042529|gb|QHB88242.1|	1790042529	QHB88242.1	hydroxymethylbilane synthase	Escherichia coli BL21-AI	4	4	4	16	22.865	15	7			18.4377		17.9124																						17.95		17.7706	19.5925	19.697	19.8638	20.5146	18.7139	17.6462	18.2572	17.7467
gi|1790040904|gb|QHB86617.1|	gi|1790040904|gb|QHB86617.1|	1790040904	QHB86617.1	imidazole glycerol phosphate synthase subunit HisF	Escherichia coli BL21-AI	2	2	2	16	22.8402	11	4			18.5866		19.4774																						17.5183			19.655	18.7943	19.5405	19.3081	19.5527			20.2226
gi|1790041394|gb|QHB87107.1|	gi|1790041394|gb|QHB87107.1|	1790041394	QHB87107.1	autonomous glycyl radical cofactor GrcA	Escherichia coli BL21-AI	2	1	1	10	22.8378	7	6	20.4964				19.4419	0.481456			19.5274	0.510865										20.4964															19.0599	19.757	19.628
gi|1790041371|gb|QHB87084.1|	gi|1790041371|gb|QHB87084.1|	1790041371	QHB87084.1	phosphoribosylformylglycinamidine synthase	Escherichia coli BL21-AI	8	8	8	63	22.8253	18	8		18.3735	15.2792		16.8552								15.6457										17.9521		18.7949		16.6301		14.4934	14.7141	18.231	19.3467	20.5223	15.4837		14.628	17.8267
gi|1790039486|gb|QHB85199.1|	gi|1790039486|gb|QHB85199.1|	1790039486	QHB85199.1	D-alanine--D-alanine ligase A	Escherichia coli BL21-AI	4	4	4	20	22.8249	12	5			18.481		18.8405																						18.1542			18.8078	17.4295	19.8945	20.8567	16.5052		19.1431	18.3507
gi|1790039625|gb|QHB85338.1|	gi|1790039625|gb|QHB85338.1|	1790039625	QHB85338.1	cysteine--tRNA ligase	Escherichia coli BL21-AI	3	3	3	23	22.7564	14	6			19.5188		18.2002										14.7879												18.8829			20.1547	19.5918	19.6566	19.5576	18.6148		18.9689
gi|1790042946|gb|QHB88659.1|	gi|1790042946|gb|QHB88659.1|	1790042946	QHB88659.1	aspartate carbamoyltransferase regulatory subunit	Escherichia coli BL21-AI	3	3	3	9	22.697	10	4	17.922				17.0886	0.5612									16.964	0.514769						17.922											21.8622	18.7777	16.855		17.3222
gi|1790040228|gb|QHB85941.1|	gi|1790040228|gb|QHB85941.1|	1790040228	QHB85941.1	catabolic alanine racemase DadX	Escherichia coli BL21-AI	4	4	4	20	22.6964	7	3			18.4659																									17.1601	19.172	19.0657	18.5882	19.0185	20.1808	18.1916
gi|1790040963|gb|QHB86676.1|	gi|1790040963|gb|QHB86676.1|	1790040963	QHB86676.1	galactitol permease IIC component	Escherichia coli BL21-AI	1	1	1	9	22.6949	5	3			19.8071																								19.058	20.6192		19.7442	19.184	20.3931
gi|1790040651|gb|QHB86364.1|	gi|1790040651|gb|QHB86364.1|	1790040651	QHB86364.1	L,D-transpeptidase LdtE	Escherichia coli BL21-AI	3	3	3	14	22.6874	5	2							18.7196
gi|1790039290|gb|QHB85003.1|	gi|1790039290|gb|QHB85003.1|	1790039290	QHB85003.1	polyamine aminopropyltransferase	Escherichia coli BL21-AI	2	2	2	11	22.683	9	7			19.3009		18.841																						19.3419		19.2175	19.3433					17.6931	19.4582	18.6301
gi|1790042695|gb|QHB88408.1|	gi|1790042695|gb|QHB88408.1|	1790042695	QHB88408.1	glutamate racemase	Escherichia coli BL21-AI	1	1	1	16	22.6809	9	3									18.2775																							20.4388	20.8933	19.4112
gi|1790040906|gb|QHB86619.1|	gi|1790040906|gb|QHB86619.1|	1790040906	QHB86619.1	UDP-glucose 6-dehydrogenase	Escherichia coli BL21-AI	6	6	6	24	22.6653	5	2			18.2655																								18.5283		18.0026		19.0735	19.5381	20.7651
gi|1790039537|gb|QHB85250.1|	gi|1790039537|gb|QHB85250.1|	1790039537	QHB85250.1	cytochrome o ubiquinol oxidase subunit II	Escherichia coli BL21-AI	3	3	3	18	22.6627	9	6			19.6629		17.7762																						19.6584	18.9689	19.476	20.5481	19.3439	18.9612	19.9801			18.6776
gi|1790039345|gb|QHB85058.1|	gi|1790039345|gb|QHB85058.1|	1790039345	QHB85058.1	UDP-3-O-(3-hydroxymyristoyl)glucosamine N-acyltransferase	Escherichia coli BL21-AI	2	2	2	9	22.6441	7	2					18.2569																											19.4209	21.4493	18.7811		18.3027
gi|1790039803|gb|QHB85516.1|	gi|1790039803|gb|QHB85516.1|	1790039803	QHB85516.1	Tol-Pal system protein TolQ	Escherichia coli BL21-AI	2	2	2	10	22.6254	13	11			19.8114								16.4634				17.1763		16.0124										19.5074	19.2273		20.6993		19.674	18.5976
gi|1790041940|gb|QHB87653.1|	gi|1790041940|gb|QHB87653.1|	1790041940	QHB87653.1	outer membrane lipid asymmetry maintenance protein MlaD	Escherichia coli BL21-AI	1	1	1	11	22.5993	15	9			18.9341		18.1594				17.5723																		18.2433	18.6775	19.243	19.5724	18.5957	19.1757	18.8578		18.1935		17.6523
gi|1790041325|gb|QHB87038.1|	gi|1790041325|gb|QHB87038.1|	1790041325	QHB87038.1	ribosome biogenesis GTPase Der	Escherichia coli BL21-AI	4	4	4	26	22.5973	16	9			17.4251		17.9839				17.2236																		16.7589	16.3361		19.1803		19.0389	19.3946	18.2781	17.3222	19.4485	16.3347
gi|1790041052|gb|QHB86765.1|	gi|1790041052|gb|QHB86765.1|	1790041052	QHB86765.1	nucleoid-associated protein YejK	Escherichia coli BL21-AI	5	5	5	17	22.5896	7	2			18.4695																								18.8653			18.0738		20.1894	20.8901
gi|1790041334|gb|QHB87047.1|	gi|1790041334|gb|QHB87047.1|	1790041334	QHB87047.1	alpha2-macroglobulin	Escherichia coli BL21-AI	2	2	2	84	22.5838	13	6			18.5462		18.7157				17.8559																		18.0521			19.0404	19.3428	19.6555	19.3682	18.9598		18.7579
gi|1790040873|gb|QHB86586.1|	gi|1790040873|gb|QHB86586.1|	1790040873	QHB86586.1	cytochrome B	Escherichia coli BL21-AI	1	1	1	7	22.5807	6	6			19.8735		19.2471																						19.0504	20.2969	20.2202	19.9263						19.4626	19.0317
gi|1790042877|gb|QHB88590.1|	gi|1790042877|gb|QHB88590.1|	1790042877	QHB88590.1	FtsH protease activity modulator HflK	Escherichia coli BL21-AI	3	3	3	27	22.5654	19	11			18.7393		17.9166				16.8832																		17.6477		19.3626	19.2076	18.3725	18.4203	18.545	18.3423	17.3647	18.3024	17.6463
gi|1790039189|gb|QHB84902.1|	gi|1790039189|gb|QHB84902.1|	1790039189	QHB84902.1	peroxide stress protein YaaA	Escherichia coli BL21-AI	3	3	3	16	22.5421	10	3	16.9651	17.0382			18.6788	3.28014														17.2748		16.6554			17.0382										20.0869	17.7928
gi|1790040597|gb|QHB86310.1|	gi|1790040597|gb|QHB86310.1|	1790040597	QHB86310.1	adenosine deaminase	Escherichia coli BL21-AI	2	2	2	15	22.5252	5	3					18.0864																														16.8815		19.482
gi|1790039192|gb|QHB84905.1|	gi|1790039192|gb|QHB84905.1|	1790039192	QHB84905.1	molybdopterin adenylyltransferase	Escherichia coli BL21-AI	2	2	2	8	22.5242	5	4		17.3667	19.5191		19.5374																				17.3667		18.6926			20.3456							19.4561
gi|1790040638|gb|QHB86351.1|	gi|1790040638|gb|QHB86351.1|	1790040638	QHB86351.1	multidrug efflux MATE transporter MdtK	Escherichia coli BL21-AI	2	2	2	8	22.438	4	4					20.5548				19.4666																											21.2489	19.8606
gi|1790041134|gb|QHB86847.1|	gi|1790041134|gb|QHB86847.1|	1790041134	QHB86847.1	NADH-quinone oxidoreductase subunit NuoI	Escherichia coli BL21-AI	1	1	1	12	22.4357	4	2			20.0597																								19.1052			21.0143
gi|1790039399|gb|QHB85112.1|	gi|1790039399|gb|QHB85112.1|	1790039399	QHB85112.1	esterase FrsA	Escherichia coli BL21-AI	6	6	6	29	22.4065	6	2			18.125																										17.6567	18.5933	19.017	19.9955	20.9502	19.423
gi|1790040577|gb|QHB86290.1|	gi|1790040577|gb|QHB86290.1|	1790040577	QHB86290.1	Re/Si-specific NAD(P)(+) transhydrogenase subunit alpha	Escherichia coli BL21-AI	3	3	3	20	22.3979	9	6			18.912														14.6221										18.5878	19.3299	18.4584	19.272	19.5445	19.9665	18.8748
gi|1790041408|gb|QHB87121.1|	gi|1790041408|gb|QHB87121.1|	1790041408	QHB87121.1	bifunctional chorismate mutase/prephenate dehydratase	Escherichia coli BL21-AI	3	3	3	18	22.3905	10	6			18.9673		17.9354																						18.3269	19.1479	19.4272		19.2244	20.0552	19.9577	18.1571		18.7864	18.2132
gi|1790042256|gb|QHB87969.1|	gi|1790042256|gb|QHB87969.1|	1790042256	QHB87969.1	insulinase family protein	Escherichia coli BL21-AI	2	2	2	25	22.3703	15	8			17.3761		17.6267										15.0672												16.1849		17.2421	18.7013	18.6925	19.7862	19.3875			17.4978	17.8446
gi|1790039547|gb|QHB85260.1|	gi|1790039547|gb|QHB85260.1|	1790039547	QHB85260.1	peptidylprolyl isomerase	Escherichia coli BL21-AI	4	4	4	34	22.3349	12	8			18.1337		16.071				16.5429																		16.2164	19.7518	17.5973	18.9695						15.5153
gi|1790042427|gb|QHB88140.1|	gi|1790042427|gb|QHB88140.1|	1790042427	QHB88140.1	heat shock chaperone IbpA	Escherichia coli BL21-AI	1	1	1	8	22.3192	5	5					19.3122				19.3512																										18.9907	19.2475
gi|1790041819|gb|QHB87532.1|	gi|1790041819|gb|QHB87532.1|	1790041819	QHB87532.1	tRNA (adenosine(37)-N6)-threonylcarbamoyltransferase complex transferase subunit TsaD	Escherichia coli BL21-AI	2	2	2	18	22.298	13	6			17.0365		17.4885																						15.976		17.8786	17.255	18.6107		19.6256	18.5868	16.1699	18.1481
gi|1790040130|gb|QHB85843.1|	gi|1790040130|gb|QHB85843.1|	1790040130	QHB85843.1	DUF480 domain-containing protein	Escherichia coli BL21-AI	3	3	3	13	22.2869	9	5		17.2456	18.5189						18.2337														17.2456				18.6876	17.3771		19.492	19.1523	19.4961		18.885
gi|1790039963|gb|QHB85676.1|	gi|1790039963|gb|QHB85676.1|	1790039963	QHB85676.1	cysteine/glutathione ABC transporter permease/ATP-binding protein CydD	Escherichia coli BL21-AI	3	3	3	27	22.2844	15	10			18.6141		18.5473				16.0316																		17.2576	19.6925	18.3525	19.1538		18.3912	18.4446		18.1236	19.7674	17.9931
gi|1790041547|gb|QHB87260.1|	gi|1790041547|gb|QHB87260.1|	1790041547	QHB87260.1	glucarate dehydratase	Escherichia coli BL21-AI	7	7	7	20	22.2831	5	2															14.9701
gi|1790042019|gb|QHB87732.1|	gi|1790042019|gb|QHB87732.1|	1790042019	QHB87732.1	methionyl-tRNA formyltransferase	Escherichia coli BL21-AI	3	3	3	19	22.2561	9	4			18.4422		18.6221																						17.7057			19.1787	19.8016	19.2254	19.5418			18.5263
gi|1790042128|gb|QHB87841.1|	gi|1790042128|gb|QHB87841.1|	1790042128	QHB87841.1	ADP compounds hydrolase NudE	Escherichia coli BL21-AI	2	2	2	10	22.2515	5	2															16.3021
gi|1790042160|gb|QHB87873.1|	gi|1790042160|gb|QHB87873.1|	1790042160	QHB87873.1	glycogen synthase GlgA	Escherichia coli BL21-AI	1	1	1	19	22.2449	16	9			18.2435		17.5369				16.6214																		17.134		18.6651	18.9313	18.0285	18.3581		18.2541	17.2526	17.7949	17.3423
gi|1790040920|gb|QHB86633.1|	gi|1790040920|gb|QHB86633.1|	1790040920	QHB86633.1	dTDP-4-dehydrorhamnose reductase	Escherichia coli BL21-AI	1	1	1	11	22.2386	11	4			17.9912		17.7202																							17.3292	18.6533		18.1526	19.7013	19.9894			17.7862	17.6542
gi|1790042718|gb|QHB88431.1|	gi|1790042718|gb|QHB88431.1|	1790042718	QHB88431.1	DUF416 family protein	Escherichia coli BL21-AI	1	1	1	11	22.1815	4	2									19.1523																						19.6791		20.3475
gi|1790043237|gb|QHB88950.1|	gi|1790043237|gb|QHB88950.1|	1790043237	QHB88950.1	threonine ammonia-lyase, biosynthetic	Escherichia coli BL21-AI	8	8	8	31	22.1721	9	5															14.7345		14.3761															19.4687	21.4332
gi|1790041571|gb|QHB87284.1|	gi|1790041571|gb|QHB87284.1|	1790041571	QHB87284.1	cysteine desulfurase sulfur acceptor subunit CsdE	Escherichia coli BL21-AI	2	2	2	11	22.1657	8	6					19.1513		18.866		18.6738																						18.9615	19.0258			18.8123	19.4903
gi|1790040192|gb|QHB85905.1|	gi|1790040192|gb|QHB85905.1|	1790040192	QHB85905.1	tRNA 2-thiouridine(34) synthase MnmA	Escherichia coli BL21-AI	2	2	2	15	22.1551	5	2			19.886																										19.6667	20.1052		17.8691	19.8976	19.8266
gi|1790040178|gb|QHB85891.1|	gi|1790040178|gb|QHB85891.1|	1790040178	QHB85891.1	lipoprotein-releasing ABC transporter ATP-binding protein LolD	Escherichia coli BL21-AI	1	1	1	11	22.1032	6	2					18.4148																															18.3651
gi|1790041327|gb|QHB87040.1|	gi|1790041327|gb|QHB87040.1|	1790041327	QHB87040.1	tetratricopeptide repeat protein	Escherichia coli BL21-AI	1	1	1	13	22.0863	9	5			19.1026		18.5649																							18.4592	19.0404	19.8083		18.6135	18.8382			19.0102
gi|1790043057|gb|QHB88770.1|	gi|1790043057|gb|QHB88770.1|	1790043057	QHB88770.1	16S rRNA (guanine(1207)-N(2))-methyltransferase RsmC	Escherichia coli BL21-AI	4	4	4	20	22.0784	16	10			17.2842		16.8319						12.3718		13.766														16.8517	16.2641	17.1819	18.8393		19.3138	20.387			17.0969	16.5669
gi|1790041407|gb|QHB87120.1|	gi|1790041407|gb|QHB87120.1|	1790041407	QHB87120.1	ribosome-associated translation inhibitor RaiA	Escherichia coli BL21-AI	1	1	1	6	22.0684	2	2											20.205
gi|1790042014|gb|QHB87727.1|	gi|1790042014|gb|QHB87727.1|	1790042014	QHB87727.1	L-threonylcarbamoyladenylate synthase type 1 TsaC	Escherichia coli BL21-AI	3	3	3	12	22.0291	4	2									19.2022
gi|1790039187|gb|QHB84900.1|	gi|1790039187|gb|QHB84900.1|	1790039187	QHB84900.1	threonine synthase	Escherichia coli BL21-AI	3	3	3	22	22.025	4	2			17.9325																										16.5638	19.3012		20.0136	20.9295
gi|1790039748|gb|QHB85461.1|	gi|1790039748|gb|QHB85461.1|	1790039748	QHB85461.1	PTS N-acetyl glucosamine transporter subunit IIABC	Escherichia coli BL21-AI	2	2	2	19	22.0128	6	3			18.7813																								16.7791	20.4235		19.1415	19.3643	20.0028	18.6425
gi|1790042972|gb|QHB88685.1|	gi|1790042972|gb|QHB88685.1|	1790042972	QHB88685.1	Gfo/Idh/MocA family oxidoreductase	Escherichia coli BL21-AI	3	3	3	15	22.0045	2	2					18.0618																															18.5402
gi|1790041594|gb|QHB87307.1|	gi|1790041594|gb|QHB87307.1|	1790041594	QHB87307.1	HTH-type transcriptional regulator GalR	Escherichia coli BL21-AI	3	3	3	19	21.9852	12	4			17.1842		17.1224																								16.7172	17.6512	17.6544	19.3215	19.7601	17.5822		17.2918	16.953
gi|1790042895|gb|QHB88608.1|	gi|1790042895|gb|QHB88608.1|	1790042895	QHB88608.1	L-ascorbate 6-phosphate lactonase	Escherichia coli BL21-AI	3	3	3	18	21.9363	8	4					18.608																														19.4291	19.6375	18.2971
gi|1790039426|gb|QHB85139.1|	gi|1790039426|gb|QHB85139.1|	1790039426	QHB85139.1	(Fe-S)-binding protein	Escherichia coli BL21-AI	1	1	1	15	21.9173	13	5			17.6957		17.4804																						17.0736		17.4476	18.566	18.6596	18.7551	19.1956	17.8901	16.9676
gi|1790042526|gb|QHB88239.1|	gi|1790042526|gb|QHB88239.1|	1790042526	QHB88239.1	protoheme IX biogenesis protein HemY	Escherichia coli BL21-AI	2	2	2	19	21.9073	8	4			18.5689																								17.3997	20.0203	18.43	18.4255	19.0184	17.9458	18.4785	18.4379
gi|1790043032|gb|QHB88745.1|	gi|1790043032|gb|QHB88745.1|	1790043032	QHB88745.1	pyruvate/proton symporter BtsT	Escherichia coli BL21-AI	3	3	3	20	21.9064	7	5			19.7659		17.8714																							19.7091		19.8227		18.097	18.0658			19.1329	16.5937
gi|1790040874|gb|QHB86587.1|	gi|1790040874|gb|QHB86587.1|	1790040874	QHB86587.1	DgsA anti-repressor MtfA	Escherichia coli BL21-AI	1	1	1	6	21.9016	5	2			18.8503																								18.2499	19.4506			18.2499	19.9673	19.243
gi|1790042228|gb|QHB87941.1|	gi|1790042228|gb|QHB87941.1|	1790042228	QHB87941.1	23S rRNA (adenine(2030)-N(6))-methyltransferase RlmJ	Escherichia coli BL21-AI	3	3	3	17	21.8853	9	2			16.8371																								16.2303	17.4439			18.2855	19.5999	19.5086
gi|1790039984|gb|QHB85697.1|	gi|1790039984|gb|QHB85697.1|	1790039984	QHB85697.1	3-phosphoshikimate 1-carboxyvinyltransferase	Escherichia coli BL21-AI	3	3	3	21	21.875	12	6			18.5075		17.7013				16.6498																		18.7915			18.2235	19.4964	18.8878		17.9594		18.2477
gi|1790041014|gb|QHB86727.1|	gi|1790041014|gb|QHB86727.1|	1790041014	QHB86727.1	galactose/methyl galactoside ABC transporter permease MglC	Escherichia coli BL21-AI	1	1	1	6	21.8649	3	2		19.4942	19.4358																					19.4942			17.937			20.9346
gi|1790042942|gb|QHB88655.1|	gi|1790042942|gb|QHB88655.1|	1790042942	QHB88655.1	PTS trehalose transporter subunit IIBC	Escherichia coli BL21-AI	1	1	1	10	21.8325	8	2					18.4245																										18.5654	19.8835	18.9698	19.0305	18.3324	18.5166
gi|1790041444|gb|QHB87157.1|	gi|1790041444|gb|QHB87157.1|	1790041444	QHB87157.1	DUF883 family protein	Escherichia coli BL21-AI	2	2	2	5	21.8268	2	2			20.1984																								21.1145			19.2822
gi|1790042943|gb|QHB88656.1|	gi|1790042943|gb|QHB88656.1|	1790042943	QHB88656.1	HTH-type transcriptional regulator TreR	Escherichia coli BL21-AI	1	1	1	15	21.7457	15	7			16.9423		16.7253																						16.0225	17.0683	17.0798	17.5984	17.1429	18.7265	18.8533	17.9908		17.0951	16.3924
gi|1790042916|gb|QHB88629.1|	gi|1790042916|gb|QHB88629.1|	1790042916	QHB88629.1	D-serine/D-alanine/glycine transporter	Escherichia coli BL21-AI	1	1	1	11	21.7338	7	3			18.6044																									18.0982	19.2446	18.4702	18.2758	19.1239	19.0238	18.6859
gi|1790041168|gb|QHB86881.1|	gi|1790041168|gb|QHB86881.1|	1790041168	QHB86881.1	bifunctional tetrahydrofolate synthase/dihydrofolate synthase	Escherichia coli BL21-AI	3	3	3	21	21.7265	4	2			17.8248																								16.7012			18.9484		19.2415	20.19
gi|1790042576|gb|QHB88289.1|	gi|1790042576|gb|QHB88289.1|	1790042576	QHB88289.1	Sec-independent protein translocase subunit TatB	Escherichia coli BL21-AI	1	1	1	13	21.7205	11	7			18.592		17.1995																						17.3816	18.7282	19.0578	19.2004	16.6893	18.3456	18.0577	17.7913	16.3858	17.5424
gi|1790040587|gb|QHB86300.1|	gi|1790040587|gb|QHB86300.1|	1790040587	QHB86300.1	mannose-6-phosphate isomerase	Escherichia coli BL21-AI	2	2	2	21	21.7122	5	2			19.0575																										18.6903	19.4247	19.4103	18.5683	18.7646
gi|1790039834|gb|QHB85547.1|	gi|1790039834|gb|QHB85547.1|	1790039834	QHB85547.1	excinuclease ABC subunit B	Escherichia coli BL21-AI	3	3	3	38	21.6999	6	2					17.0892																															17.6146
gi|1790042506|gb|QHB88219.1|	gi|1790042506|gb|QHB88219.1|	1790042506	QHB88219.1	guanosine-5-triphosphate,3-diphosphate diphosphatase	Escherichia coli BL21-AI	3	3	3	23	21.5874	4	2															14.4335
gi|1790042273|gb|QHB87986.1|	gi|1790042273|gb|QHB87986.1|	1790042273	QHB87986.1	dipeptide ABC transporter ATP-binding protein	Escherichia coli BL21-AI	2	2	2	19	21.5827	11	8	17.0364	17.5146			18.0549	2.02588	17.3503	1.24304	17.4441	1.32662									17.0364						17.9791	17.0502											18.2424
gi|1790039523|gb|QHB85236.1|	gi|1790039523|gb|QHB85236.1|	1790039523	QHB85236.1	(2E,6E)-farnesyl diphosphate synthase	Escherichia coli BL21-AI	2	2	2	13	21.5399	5	3					17.0555																														15.5913	18.7067	16.8685
gi|1790042664|gb|QHB88377.1|	gi|1790042664|gb|QHB88377.1|	1790042664	QHB88377.1	cell division protein FtsN	Escherichia coli BL21-AI	2	2	2	19	21.5234	6	4			15.7617																								14.0965	16.3315	15.9683	16.6505		19.2793	19.0909
gi|1790039233|gb|QHB84946.1|	gi|1790039233|gb|QHB84946.1|	1790039233	QHB84946.1	RNA polymerase-associated protein RapA	Escherichia coli BL21-AI	4	4	4	51	21.5227	12	5			17.3109		16.1241																						17.2678	16.8021		17.8628	17.0431	17.9067	20.0407	14.3543		16.9409	15.3073
gi|1790041695|gb|QHB87408.1|	gi|1790041695|gb|QHB87408.1|	1790041695	QHB87408.1	DUF2884 family protein	Escherichia coli BL21-AI	1	1	1	13	21.4992	10	8			18.3215		18.2077				17.9741																			18.3475	18.3347	18.2823	16.8492		18.1902		17.9666	18.298
gi|1790041143|gb|QHB86856.1|	gi|1790041143|gb|QHB86856.1|	1790041143	QHB86856.1	aminotransferase class I/II-fold pyridoxal phosphate-dependent enzyme	Escherichia coli BL21-AI	3	3	3	20	21.4883	19	11			16.002		15.6764				15.0258																		14.7515	16.5464	16.6251	16.0848	17.3491	17.9393	19.2679	17.516	15.2264	16.8052	15.1813
gi|1790042463|gb|QHB88176.1|	gi|1790042463|gb|QHB88176.1|	1790042463	QHB88176.1	phosphate signaling complex protein PhoU	Escherichia coli BL21-AI	2	2	2	16	21.3178	5	5			19.0083		18.2545																						18.0835		19.4379	19.5035						18.0539
gi|1790043219|gb|QHB88932.1|	gi|1790043219|gb|QHB88932.1|	1790043219	QHB88932.1	glutamate synthase large subunit	Escherichia coli BL21-AI	4	4	4	75	21.2839	11	8					16.9601						14.906				15.7158																					17.5701
gi|1790040122|gb|QHB85835.1|	gi|1790040122|gb|QHB85835.1|	1790040122	QHB85835.1	N-methyl-L-tryptophan oxidase	Escherichia coli BL21-AI	1	1	1	20	21.2698	11	5			17.9352		17.3315																							17.8765	17.6634	18.2659	17.6835	17.9974	17.9898				17.7267
gi|1790042665|gb|QHB88378.1|	gi|1790042665|gb|QHB88378.1|	1790042665	QHB88378.1	DNA-binding transcriptional regulator CytR	Escherichia coli BL21-AI	1	1	1	16	21.2669	5	2					16.607																														15.959
gi|1790042882|gb|QHB88595.1|	gi|1790042882|gb|QHB88595.1|	1790042882	QHB88595.1	ribonuclease R	Escherichia coli BL21-AI	2	2	2	45	21.2603	9	2					17.1827																										18.4843	17.711	19.0723			17.51	16.8554
gi|1790040003|gb|QHB85716.1|	gi|1790040003|gb|QHB85716.1|	1790040003	QHB85716.1	hydroxyacylglutathione hydrolase GloC	Escherichia coli BL21-AI	1	1	1	8	21.1494	2	2			19.4025																									19.0568		19.7483
gi|1790042698|gb|QHB88411.1|	gi|1790042698|gb|QHB88411.1|	1790042698	QHB88411.1	type I pantothenate kinase	Escherichia coli BL21-AI	1	1	1	17	21.0812	9	4			17.4208		17.2697																						16.746			18.0956	16.6345	17.1488				17.2402
gi|1790042100|gb|QHB87813.1|	gi|1790042100|gb|QHB87813.1|	1790042100	QHB87813.1	uroporphyrinogen-III C-methyltransferase	Escherichia coli BL21-AI	1	1	1	23	21.0337	14	6			16.5898		15.4865																						15.81	16.2401	16.9441	17.3649	16.5791	17.8673	18.9658	16.9478	15.1922		15.7807
gi|1790043179|gb|QHB88892.1|	gi|1790043179|gb|QHB88892.1|	1790043179	QHB88892.1	LPS O-antigen chain length determinant protein WzzB	Escherichia coli BL21-AI	1	1	1	17	20.9744	14	6			17.5458		15.7109																							17.374	17.7093	17.554	16.9944	17.0484	17.9781	16.9598	15.8273		14.71
gi|1790042765|gb|QHB88478.1|	gi|1790042765|gb|QHB88478.1|	1790042765	QHB88478.1	alanine racemase	Escherichia coli BL21-AI	2	2	2	19	20.9194	5	2		16.8542	16.9812																				16.8542				15.9829			17.9796		17.9378	19.6934
gi|1790041957|gb|QHB87670.1|	gi|1790041957|gb|QHB87670.1|	1790041957	QHB87670.1	aerobic respiration two-component sensor histidine kinase ArcB	Escherichia coli BL21-AI	2	2	2	40	20.8987	4	2			16.6121																								14.9722			18.252		18.3977	18.5257
gi|1790039428|gb|QHB85141.1|	gi|1790039428|gb|QHB85141.1|	1790039428	QHB85141.1	lactate utilization protein C	Escherichia coli BL21-AI	1	1	1	16	20.8787	10	2		15.3153			16.5116																				15.3153						17.1728	17.6503	18.441	17.4307	15.7616	17.2617
gi|1790041105|gb|QHB86818.1|	gi|1790041105|gb|QHB86818.1|	1790041105	QHB86818.1	nicotinamide mononucleotide deamidase-related protein YfaY	Escherichia coli BL21-AI	2	2	2	16	20.8781	11	4			16.6007		15.8236																								16.0778	17.1236	16.2714	17.3145	19.6298		15.0264	16.6208
gi|1790040793|gb|QHB86506.1|	gi|1790040793|gb|QHB86506.1|	1790040793	QHB86506.1	carboxy terminal-processing peptidase	Escherichia coli BL21-AI	2	2	2	37	20.8671	14	7			16.7033		15.2427																						15.8718	16.687	16.3611	17.8935		16.6018	17.5907	16.6713		15.6116	14.6475
gi|1790040313|gb|QHB86026.1|	gi|1790040313|gb|QHB86026.1|	1790040313	QHB86026.1	DeoR family transcriptional regulator	Escherichia coli BL21-AI	2	2	2	16	20.8468	8	2					16.8072																											17.6259	18.6257	18.0848	16.5969	17.0175
gi|1790042119|gb|QHB87832.1|	gi|1790042119|gb|QHB87832.1|	1790042119	QHB87832.1	cell division protein DamX	Escherichia coli BL21-AI	1	1	1	15	20.8135	13	7			17.0829		16.5958																						15.3356	17.3204	17.6916	17.9841	16.1627		17.1553		16.7264	16.9047
gi|1790042385|gb|QHB88098.1|	gi|1790042385|gb|QHB88098.1|	1790042385	QHB88098.1	AsmA family protein	Escherichia coli BL21-AI	1	1	1	27	20.7913	12	6			17.8343		16.5349																						16.8728	18.1787	18.2536	18.0319	16.0997		17.3926	16.4632		16.5858
gi|1790042192|gb|QHB87905.1|	gi|1790042192|gb|QHB87905.1|	1790042192	QHB87905.1	cell division protein FtsX	Escherichia coli BL21-AI	4	4	4	18	20.7084	3	3			18.9733																								18.2596	19.092		19.5682
gi|1790041925|gb|QHB87638.1|	gi|1790041925|gb|QHB87638.1|	1790041925	QHB87638.1	dihydropteroate synthase	Escherichia coli BL21-AI	1	1	1	17	20.54	4	2					17.9111																															17.6612
gi|1790040633|gb|QHB86346.1|	gi|1790040633|gb|QHB86346.1|	1790040633	QHB86346.1	HTH-type transcriptional repressor PurR	Escherichia coli BL21-AI	2	2	2	20	20.5298	4	2					17.6667																																18.3128
gi|1790042513|gb|QHB88226.1|	gi|1790042513|gb|QHB88226.1|	1790042513	QHB88226.1	UDP-N-acetylglucosamine 2-epimerase (non-hydrolyzing)	Escherichia coli BL21-AI	2	2	2	20	20.4616	7	4			17.106																								17.1996	16.4875	17.1728	17.5642	16.4614	16.2365	16.8708
gi|1790042671|gb|QHB88384.1|	gi|1790042671|gb|QHB88384.1|	1790042671	QHB88384.1	aspartate kinase	Escherichia coli BL21-AI	3	3	3	41	20.4374	8	4					16.4325																														15.1528	17.6011	16.1892
gi|1790041144|gb|QHB86857.1|	gi|1790041144|gb|QHB86857.1|	1790041144	QHB86857.1	5-deoxynucleotidase	Escherichia coli BL21-AI	1	1	1	11	20.2997	5	5			17.6452		17.4279																						17.1342	17.6443	18.1571								17.4879
gi|1790041533|gb|QHB87246.1|	gi|1790041533|gb|QHB87246.1|	1790041533	QHB87246.1	FAD-linked oxidoreductase	Escherichia coli BL21-AI	2	2	2	25	20.2932	6	6									15.6658								14.5224
gi|1790042138|gb|QHB87851.1|	gi|1790042138|gb|QHB87851.1|	1790042138	QHB87851.1	S1 RNA-binding domain-containing protein	Escherichia coli BL21-AI	3	3	3	43	20.2926	9	4			15.5569		14.9072																						14.9466		16.1671		15.3186	18.5486	18.6584			15.2817
gi|1790043259|gb|QHB88972.1|	gi|1790043259|gb|QHB88972.1|	1790043259	QHB88972.1	type I restriction-modification system endonuclease	Escherichia coli BL21-AI	5	5	5	74	20.2823	6	3			14.565																									12.9706	14.5327	16.1918		18.2695	18.8055	16.2886
gi|1790041142|gb|QHB86855.1|	gi|1790041142|gb|QHB86855.1|	1790041142	QHB86855.1	transcriptional regulator LrhA	Escherichia coli BL21-AI	1	1	1	13	20.2286	4	2			17.5387																									17.7236	17.3537		17.2397			17.3378
gi|1790041975|gb|QHB87688.1|	gi|1790041975|gb|QHB87688.1|	1790041975	QHB87688.1	serine endoprotease DegQ	Escherichia coli BL21-AI	1	1	1	21	20.1981	6	2			15.992																										15.5761	16.4079	17.0417	15.7952	17.9507	15.9386
gi|1790042876|gb|QHB88589.1|	gi|1790042876|gb|QHB88589.1|	1790042876	QHB88589.1	GTPase HflX	Escherichia coli BL21-AI	2	2	2	25	20.1533	8	2					16.3381																										16.5142	18.0955	18.1484	16.4941		16.6045
gi|1790042480|gb|QHB88193.1|	gi|1790042480|gb|QHB88193.1|	1790042480	QHB88193.1	tRNA uridine-5-carboxymethylaminomethyl(34) synthesis enzyme MnmG	Escherichia coli BL21-AI	3	3	3	27	20.1011	12	5			15.6136		15.6428																							15.0919		16.1352	15.6165	17.1863	17.9109	16.3283	14.4626	16.3808
gi|1790041835|gb|QHB87548.1|	gi|1790041835|gb|QHB87548.1|	1790041835	QHB87548.1	FAD-dependent oxidoreductase	Escherichia coli BL21-AI	2	2	2	34	20.0938	4	2			16.5609																								16.422			16.6998		17.9553	19.2166
gi|1790041089|gb|QHB86802.1|	gi|1790041089|gb|QHB86802.1|	1790041089	QHB86802.1	bifunctional 3-demethylubiquinone 3-O-methyltransferase/2-octaprenyl-6-hydroxy phenol methylase	Escherichia coli BL21-AI	1	1	1	15	20.0534	2	2															16.1762
gi|1790040585|gb|QHB86298.1|	gi|1790040585|gb|QHB86298.1|	1790040585	QHB86298.1	class II fumarate hydratase	Escherichia coli BL21-AI	3	3	3	22	20.0274	2	2			18.7309																								19.0553			18.4066
gi|1790039545|gb|QHB85258.1|	gi|1790039545|gb|QHB85258.1|	1790039545	QHB85258.1	endopeptidase La	Escherichia coli BL21-AI	1	1	1	40	19.8989	4	4							16.9687		17.9179
gi|1790041859|gb|QHB87572.1|	gi|1790041859|gb|QHB87572.1|	1790041859	QHB87572.1	LysR family transcriptional regulator	Escherichia coli BL21-AI	2	2	2	18	19.8543	2	2			17.8449																								17.6185		18.0712
gi|1790043232|gb|QHB88945.1|	gi|1790043232|gb|QHB88945.1|	1790043232	QHB88945.1	DUF3748 domain-containing protein	Escherichia coli BL21-AI	1	1	1	22	19.8131	4	2			17.9968																										18.4325	17.5612		17.4947	17.5301
gi|1790042161|gb|QHB87874.1|	gi|1790042161|gb|QHB87874.1|	1790042161	QHB87874.1	glucose-1-phosphate adenylyltransferase	Escherichia coli BL21-AI	2	2	2	21	19.766	2	2			17.1938																								16.1335		18.254
gi|1790040185|gb|QHB85898.1|	gi|1790040185|gb|QHB85898.1|	1790040185	QHB85898.1	spermidine/putrescine ABC transporter ATP-binding protein PotA	Escherichia coli BL21-AI	2	2	2	19	19.6133	7	2					15.7308																										15.2825	17.8419	17.3987			16.1083
gi|1790042878|gb|QHB88591.1|	gi|1790042878|gb|QHB88591.1|	1790042878	QHB88591.1	protease modulator HflC	Escherichia coli BL21-AI	1	1	1	18	19.6098	5	2			15.7482																									15.5627		15.9336	15.4746	15.7675		16.582
gi|1790040023|gb|QHB85736.1|	gi|1790040023|gb|QHB85736.1|	1790040023	QHB85736.1	bifunctional 23S rRNA (guanine(2069)-N(7))-methyltransferase RlmK/23S rRNA (guanine(2445)-N(2))-methyltransferase RlmL	Escherichia coli BL21-AI	2	2	2	41	19.567	10	4			15.8365		14.3407																						16.8096		14.8633			16.0145	18.5754	14.9163	13.5739	15.1075
gi|1790042963|gb|QHB88676.1|	gi|1790042963|gb|QHB88676.1|	1790042963	QHB88676.1	DUF853 family protein	Escherichia coli BL21-AI	3	3	3	31	19.4895	7	4					16.8223												14.0841																			17.433
gi|1790039230|gb|QHB84943.1|	gi|1790039230|gb|QHB84943.1|	1790039230	QHB84943.1	LPS assembly protein LptD	Escherichia coli BL21-AI	1	1	1	45	19.4691	8	8			17.1832		15.9845				15.876																			16.8479	17.5185						15.7459	16.5396
gi|1790042325|gb|QHB88038.1|	gi|1790042325|gb|QHB88038.1|	1790042325	QHB88038.1	selenocysteine-specific translation elongation factor	Escherichia coli BL21-AI	2	2	2	37	19.148	5	2					13.9784																															14.2545	13.7023
gi|1790041776|gb|QHB87489.1|	gi|1790041776|gb|QHB87489.1|	1790041776	QHB87489.1	DNA topoisomerase IV subunit A	Escherichia coli BL21-AI	2	2	2	35	19.1206	8	8													15.5082		16.4775		15.8159
gi|1790041291|gb|QHB87004.1|	gi|1790041291|gb|QHB87004.1|	1790041291	QHB87004.1	outer membrane protein assembly factor BamC	Escherichia coli BL21-AI	1	1	1	21	18.9649	9	5		12.8193	15.3126		15.4778																			12.8193				15.0157	15.6096						14.1207	15.3596	16.9532
[truncated: 29 more columns]

## Sheet: iBAQ-ABP-Passed Filters
Protein IDs	Majority protein IDs	Organism	Protein ID	% Peptide Sequence Coverage (Ionizable)	MW (kDa)	Fasta headers	Genes	Pathway Reaction Functional Categories	CAZy ID (http://www.cazy.org/b16291.html)	Peptides	Unique peptides	iBAQ Max	Dataset Obs.	ABP Dataset Obs.	Diazirine-ABP Obs.	Alkyne-ABP Obs.	XN-ABP-1	IXN-ABP-1	XN-ABP-3	IXN-ABP-3	XN-ABP-2	IXN-ABP-2	XN-ABP-4	IXN-ABP-4	E.C.	NP-UVCTR-AVE	NP-NoUVCTR-AVE	XN-ABP-1 AVG	IXN-ABP-1 AVG	XN-ABP-3 AVG	IXN-ABP-3 AVG	XN-ABP-2 AVG	IXIN-ABP-2 AVG	XN-ABP-4 AVG	IXN-ABP-4 AVG	NP-UVCTR-1	NP-UVCTR-2	NP-UVCTR-3	NP-UVCTR-4	NP-NoUVCTR-5	NP-NoUVCTR-6	NP-NoUVCTR-7	NP-NoUVCTR-8	XN-ABP-1_rep1	XN-ABP-1_rep2	XN-ABP-1_rep3	XN-ABP-1_rep4	IXN-ABP-1-rep1	IXN-ABP-1-rep2
gi|1790041509|gb|QHB87222.1|	gi|1790041509|gb|QHB87222.1|	Escherichia coli BL21-AI	QHB87222.1	3.4	40.118	murein hydrolase activator NlpD; CBM50 modules are also found in a multitude of other enzymes targeting the petidoglycan such as peptidases and amidases. Also known as LysM domains	NlpD	carbohydrate binding domain; GSU80_13020 (NlpD) | CBM50	GSU80_13020 (NlpD) | CBM50	1	1	17.1255	5	3	1	0	1									15.6024		16.893									15.1971		16.0078						16.6117	16.9419	17.1255
gi|1790042673|gb|QHB88386.1|	gi|1790042673|gb|QHB88386.1|	Escherichia coli BL21-AI	QHB88386.1	31	80.051	catalase/peroxidase HPI	HPI	cytochrome/oxidase activity		18	18	22.0791	23	16	4	0	1	1	1	1						18.2551	18.5224	21.5568	21.3533	19.4552	20.7395					19.9267	18.5808	15.3637	19.1491	17.7736	19.8759	17.9178		21.6164	20.5901	21.9416	22.0791	21.2625	21.7668
gi|1790040873|gb|QHB86586.1|	gi|1790040873|gb|QHB86586.1|	Escherichia coli BL21-AI	QHB86586.1	5.1	20.337	cytochrome B		cytochrome/oxidase activity		1	1	20.2969	6	6	2	0	1	1										19.8735	19.2471															19.0504	20.2969	20.2202	19.9263		19.4626
gi|1790040122|gb|QHB85835.1|	gi|1790040122|gb|QHB85835.1|	Escherichia coli BL21-AI	QHB85835.1	4	40.902	N-methyl-L-tryptophan oxidase		cytochrome/oxidase activity		1	1	18.2659	5	5	2	0	1	1										17.9352	17.3315																17.8765	17.6634	18.2659
gi|1790042599|gb|QHB88312.1|	gi|1790042599|gb|QHB88312.1|	Escherichia coli BL21-AI	QHB88312.1	16	52.728	oxygen-independent coproporphyrinogen III oxidase		cytochrome/oxidase activity		5	5	19.4535	5	5	2	0	1	1										18.5032	17.9664																	17.5529	19.4535		17.0273
gi|1790040612|gb|QHB86325.1|	gi|1790040612|gb|QHB86325.1|	Escherichia coli BL21-AI	QHB86325.1	28	25.545	pyridoxamine 5-phosphate oxidase		cytochrome/oxidase activity		5	5	20.6504	9	9	3	0	1	1	1									19.8033	19.2521	17.9821														19.5156	19.6665	20.6504	19.3805	19.4635	18.6987
gi|1790040355|gb|QHB86068.1|	gi|1790040355|gb|QHB86068.1|	Escherichia coli BL21-AI	QHB86068.1	41.1	17.835	thiol peroxidase		cytochrome/oxidase activity		6	6	25.949	16	8	2	0	1	1								23.2519	22.3805	25.3152	24.811							23.2641	23.3832	23.0423	23.318	23.161	23.3569	20.2632	22.741	24.6116	24.8019	25.949	25.8983	24.7465	24.9728
gi|1790041294|gb|QHB87007.1|	gi|1790041294|gb|QHB87007.1|	Escherichia coli BL21-AI	QHB87007.1	28.8	17.634	thioredoxin-dependent thiol peroxidase		cytochrome/oxidase activity		4	4	23.4481	16	12	3	0	1	1		1						19.9839	19.3865	22.6628	21.5899		20.7136						19.8641		20.1037		20.2245	18.5485		21.8019	22.597	22.8042	23.4481	20.6308	22.1504
gi|1790039799|gb|QHB85512.1|	gi|1790039799|gb|QHB85512.1|	Escherichia coli BL21-AI	QHB85512.1	9	42.453	cytochrome d ubiquinol oxidase subunit II		cytochrome/oxidase activityl; translocase		4	4	26.294	16	8	2	0	1	1								22.4305	23.2099	25.3514	23.5787							22.3353	22.7374	21.4776	23.1715	22.9009	24.1156	22.8243	22.9987	24.173	26.1789	24.7596	26.294	23.9863	24.5103
gi|1790039536|gb|QHB85249.1|	gi|1790039536|gb|QHB85249.1|	Escherichia coli BL21-AI	QHB85249.1	7.8	74.367	cytochrome o ubiquinol oxidase subunit I		cytochrome/oxidase activityl; translocase		2	2	22.5303	8	8	3	0	1	1		1								21.5757	19.7693		19.4848														22.5303	20.6644	21.5323		19.7133
gi|1790039537|gb|QHB85250.1|	gi|1790039537|gb|QHB85250.1|	Escherichia coli BL21-AI	QHB85250.1	22.2	34.955	cytochrome o ubiquinol oxidase subunit II		cytochrome/oxidase activityl; translocase		3	3	20.5481	6	6	2	0	1	1										19.6629	17.7762															19.6584	18.9689	19.476	20.5481		18.6776
gi|1790039535|gb|QHB85248.1|	gi|1790039535|gb|QHB85248.1|	Escherichia coli BL21-AI	QHB85248.1	3.9	22.622	cytochrome o ubiquinol oxidase subunit III		cytochrome/oxidase activityl; translocase		2	2	22.4897	6	6	2	0	1	1										21.675	19.8244																22.4897	20.9688	21.5666	19.5163	20.7332
gi|1790039798|gb|QHB85511.1|	gi|1790039798|gb|QHB85511.1|	Escherichia coli BL21-AI	QHB85511.1	33.3	58.204	cytochrome ubiquinol oxidase subunit I		cytochrome/oxidase activityl; translocase		21	21	27.4414	20	12	3	0	1	1		1						23.824	24.1939	26.9105	26.1447		25.1643					23.5226	24.0168	23.9882	23.7683	23.9311	25.0904	23.7674	23.9865	25.9988	27.3118	26.8898	27.4414	25.916	26.5782
gi|1790039399|gb|QHB85112.1|	gi|1790039399|gb|QHB85112.1|	Escherichia coli BL21-AI	QHB85112.1	13.8	47.022	esterase FrsA	FrsA	esterase		6	6	18.5933	2	2	1	0	1											18.125																		17.6567	18.5933
gi|1790041095|gb|QHB86808.1|	gi|1790041095|gb|QHB86808.1|	Escherichia coli BL21-AI	QHB86808.1	38.3	40.833	glycerophosphodiester phosphodiesterase		esterase		12	12	24.5816	16	8	2	0	1	1								22.6708	22.2793	23.9951	23.6366							23.2468	22.9833	21.9782	22.4748	22.2143	22.9534	21.7224	22.227	23.5371	23.7217	24.1402	24.5816	23.458	23.7552
gi|1790039746|gb|QHB85459.1|	gi|1790039746|gb|QHB85459.1|	Escherichia coli BL21-AI	QHB85459.1	27.2	40.977	N-acetylglucosamine-6-phosphate deacetylase	NagA	esterase; GSU80_03190 (NagA) | CE9	GSU80_03190 (NagA) | CE9	7	7	22.9414	12	6	2	0	1		1						3.5.1.25	21.2235	21.252	22.0499		22.4199						19.8537	20.6176	21.5427	22.8799	21.8575	20.6466			22.4767	22.9414	20.4776	22.3039
gi|1790041835|gb|QHB87548.1|	gi|1790041835|gb|QHB87548.1|	Escherichia coli BL21-AI	QHB87548.1	3.4	72.677	FAD-dependent oxidoreductase		flavoprotein		2	2	16.6998	2	2	1	0	1											16.5609																16.422			16.6998
gi|1790041533|gb|QHB87246.1|	gi|1790041533|gb|QHB87246.1|	Escherichia coli BL21-AI	QHB87246.1	6.2	53.737	FAD-linked oxidoreductase		flavoprotein		2	2	17.0594	6	6	1	1				1				1							15.6658				14.5224
gi|1790041910|gb|QHB87623.1|	gi|1790041910|gb|QHB87623.1|	Escherichia coli BL21-AI	QHB87623.1	11.3	37.182	LLM class flavin-dependent oxidoreductase		flavoprotein		5	5	20.5093	11	11	3	0	1	1		1								19.578	18.8902		18.0695													18.2881	19.3878	20.5093	20.1267	17.6208	18.4621
gi|1790040637|gb|QHB86350.1|	gi|1790040637|gb|QHB86350.1|	Escherichia coli BL21-AI	QHB86350.1	17.4	23.445	riboflavin synthase		flavoprotein		3	3	21.7407	8	8	2	0	1	1										20.3689	19.845															19.5319	19.8963	20.3066	21.7407	18.1401	21.1308
gi|1790040283|gb|QHB85996.1|	gi|1790040283|gb|QHB85996.1|	Escherichia coli BL21-AI	QHB85996.1	25.8	14.23	acyl-CoA thioester hydrolase YciA	YciA	hydrolase		3	3	21.0516	7	6	2	0	1	1								16.6632		20.4395	17.9502								16.6632							19.7813		20.4855	21.0516	17.705	17.6443
gi|1790042128|gb|QHB87841.1|	gi|1790042128|gb|QHB87841.1|	Escherichia coli BL21-AI	QHB87841.1	16.1	21.153	ADP compounds hydrolase NudE	NudE	hydrolase		2	2	16.6862	2	2	0	1							1											16.3021
gi|1790039628|gb|QHB85341.1|	gi|1790039628|gb|QHB85341.1|	Escherichia coli BL21-AI	QHB85341.1	9.7	31.043	bifunctional methylenetetrahydrofolate dehydrogenase/methenyltetrahydrofolate cyclohydrolase FolD	FolD	hydrolase		4	4	21.1384	16	11	3	0	1	1		1						17.8735	18.7947	20.6391	19.6468		18.6482					18.1568	18.1893	17.128	18.02	18.7947				20.4411	20.0068	21.1384	20.9701	17.912	20.6922
gi|1790040307|gb|QHB86020.1|	gi|1790040307|gb|QHB86020.1|	Escherichia coli BL21-AI	QHB86020.1	7.7	21.836	GTP cyclohydrolase II		hydrolase		2	2	20.334	3	3	1	0	1											19.7917																19.0799		19.9613	20.334
gi|1790040003|gb|QHB85716.1|	gi|1790040003|gb|QHB85716.1|	Escherichia coli BL21-AI	QHB85716.1	6	23.784	hydroxyacylglutathione hydrolase GloC	GloC	hydrolase		1	1	19.7483	2	2	1	0	1											19.4025																	19.0568		19.7483
gi|1790039730|gb|QHB85443.1|	gi|1790039730|gb|QHB85443.1|	Escherichia coli BL21-AI	QHB85443.1	9	33.823	pyrimidine-specific ribonucleoside hydrolase RihA	RihA	hydrolase		2	2	21.2959	15	8	2	0	1	1								19.2023	19.0788	20.701	20.1072							19.4929	18.8838	19.2301		19.7706	18.7159	18.6882	19.1406	20.1697	20.1594	21.1789	21.2959	19.3945	20.1805
gi|1790039776|gb|QHB85489.1|	gi|1790039776|gb|QHB85489.1|	Escherichia coli BL21-AI	QHB85489.1	27.5	26.908	type 2 GTP cyclohydrolase I		hydrolase		4	4	21.7728	15	15	2	3	1	1			1		1	1				19.7416	19.1938			16.8146		17.9286	16.9858									18.6226	17.6698	20.9012	21.7728	18.9397	19.2953
gi|1790040486|gb|QHB86199.1|	gi|1790040486|gb|QHB86199.1|	Escherichia coli BL21-AI	QHB86199.1	26.8	62.815	sulfatase-like hydrolase/transferase		hydrolase, transferase		12	12	21.4654	8	7	2	0	1	1									15.9966	19.1926	21.0085											15.9966				19.0617		18.6417	19.8745	21.231	21.4654
gi|1790039460|gb|QHB85173.1|	gi|1790039460|gb|QHB85173.1|	Escherichia coli BL21-AI	QHB85173.1	22.8	116.48	β-galactosidase		hydrolase; GSU80_01555 | GH2	GSU80_01555 | GH2	19	19	21.4442	18	12	3	0	1	1		1					3.2.1.23	16.9582	17.2076	20.4175	20.3807		18.0217					16.8688	15.4803	18.1551	17.3284	18.3704		16.0448		20.0917	19.167	21.4442	20.9669	19.7763	20.2203
gi|1790042827|gb|QHB88540.1|	gi|1790042827|gb|QHB88540.1|	Escherichia coli BL21-AI	QHB88540.1	53.7	50.615	α-galactosidase	MelA	hydrolase; GSU80_20265 (MelA) | GH4	GSU80_20265 (MelA) | GH4	18	18	25.6915	20	12	3	0	1	1		1					3.2.1.22	22.0478	21.8151	24.6523	24.8749		24.1863					21.936	22.1157	21.8049	22.3345	22.2378	22.0392	21.4971	21.4861	23.9196	24.0313	25.2534	25.405	24.4626	25.6915
gi|1790042941|gb|QHB88654.1|	gi|1790042941|gb|QHB88654.1|	Escherichia coli BL21-AI	QHB88654.1	26.9	63.871	alpha,alpha-phosphotrehalase	TreC	hydrolase; GSU80_20875 (TreC) | GH13	GSU80_20875 (TreC) | GH13	13	13	23.8821	20	12	3	0	1	1		1					3.2.1.93	19.9104	19.6348	23.063	22.5589		21.5984					19.418	19.2514	20.5362	20.4359	20.364	19.7244	18.6703	19.7804	22.8086	22.5737	22.9876	23.8821	21.7501	22.7064
gi|1790039793|gb|QHB85506.1|	gi|1790039793|gb|QHB85506.1|	Escherichia coli BL21-AI	QHB85506.1	62.1	41.392	ADP-forming succinate--CoA ligase subunit beta		ligase		25	25	25.7645	20	12	3	0	1	1		1						22.5042	22.4289	25.1906	25.1733		23.7663					21.4744	22.9187	22.5682	23.0554	22.3851	22.7736	22.1508	22.4062	24.5349	24.793	25.6744	25.76	24.035	25.5668
gi|1790041463|gb|QHB87176.1|	gi|1790041463|gb|QHB87176.1|	Escherichia coli BL21-AI	QHB87176.1	42.6	96.03	alanine--tRNA ligase		ligase		27	27	22.5399	18	12	3	0	1	1		1						17.7314	16.513	21.5247	21.3692		19.9026						17.5154		17.9475	16.9281	17.2896	14.4606	17.3736	20.6867	20.9384	21.9338	22.5399	20.732	21.634
gi|1790040837|gb|QHB86550.1|	gi|1790040837|gb|QHB86550.1|	Escherichia coli BL21-AI	QHB86550.1	16.5	64.682	arginine--tRNA ligase		ligase		10	10	20.9024	9	8	2	0	1	1								17.0369		19.3634	19.2241									17.0369						18.2852	18.404	19.862	20.9024	18.5536	19.9137
gi|1790040006|gb|QHB85719.1|	gi|1790040006|gb|QHB85719.1|	Escherichia coli BL21-AI	QHB85719.1	55.2	52.57	asparagine--tRNA ligase		ligase		25	25	25.1442	20	12	3	0	1	1		1						21.2884	20.7793	24.3121	24.0004		22.7973					21.3098	21.6632	21.0528	21.128	20.5316	21.9397	19.9977	20.6483	23.7591	23.6504	24.6945	25.1442	23.5581	24.5439
gi|1790042483|gb|QHB88196.1|	gi|1790042483|gb|QHB88196.1|	Escherichia coli BL21-AI	QHB88196.1	43	36.623	aspartate--ammonia ligase		ligase		10	10	23.5891	13	12	3	0	1	1		1						17.1505		22.8458	22.6388		21.6295					17.1505								22.6005	21.8767	23.3171	23.5891	22.3846	23.0513
gi|1790040827|gb|QHB86540.1|	gi|1790040827|gb|QHB86540.1|	Escherichia coli BL21-AI	QHB86540.1	63.7	65.913	aspartate--tRNA ligase		ligase		36	36	23.2252	15	11	3	0	1	1		1						16.7178	16.7106	20.8013	21.3593		18.5284					15.8565	16.3559		17.9411		16.7106			20.6947	19.4513	21.6342	21.4251	18.9602	21.7846
gi|1790043228|gb|QHB88941.1|	gi|1790043228|gb|QHB88941.1|	Escherichia coli BL21-AI	QHB88941.1	5.4	43.438	bifunctional phosphopantothenoylcysteine decarboxylase/phosphopantothenate--cysteine ligase CoaBC		ligase		2	2	19.8256	9	9	3	0	1	1		1								18.5837	18.9146		17.9141													17.9437		17.982	19.8256	18.7899	19.0027
gi|1790039625|gb|QHB85338.1|	gi|1790039625|gb|QHB85338.1|	Escherichia coli BL21-AI	QHB85338.1	8.5	52.183	cysteine--tRNA ligase		ligase		3	3	20.1547	6	6	2	1	1	1					1					19.5188	18.2002					14.7879										18.8829			20.1547		18.9689
gi|1790039264|gb|QHB84977.1|	gi|1790039264|gb|QHB84977.1|	Escherichia coli BL21-AI	QHB84977.1	23.5	32.897	D-alanine--D-alanine ligase		ligase		6	6	20.3423	4	4	1	0	1											19.1222																17.7586	19.178	19.2097	20.3423
gi|1790039486|gb|QHB85199.1|	gi|1790039486|gb|QHB85199.1|	Escherichia coli BL21-AI	QHB85199.1	11	39.315	D-alanine--D-alanine ligase A		ligase		4	4	19.1431	5	5	2	0	1	1										18.481	18.8405															18.1542			18.8078		19.1431
gi|1790042603|gb|QHB88316.1|	gi|1790042603|gb|QHB88316.1|	Escherichia coli BL21-AI	QHB88316.1	42	51.903	glutamate--ammonia ligase		ligase		13	13	22.6764	20	12	3	0	1	1		1						19.4561	19.7506	22.2808	21.7788		20.4407					18.5921	20.0996	18.9204	20.2123	21.1526	19.2662	19.1	19.4835	22.0598	22.4222	21.9648	22.6764	21.8826	22.43
gi|1790041459|gb|QHB87172.1|	gi|1790041459|gb|QHB87172.1|	Escherichia coli BL21-AI	QHB87172.1	22.4	58.269	glutamate--cysteine ligase		ligase		8	8	25.2519	12	6	2	0	1		1							21.7652	23.7303	24.0283		23.1068						18.2303	23.201	23.8642		23.6493		23.4171	24.1243	23.36	23.0425	24.459	25.2519
gi|1790041230|gb|QHB86943.1|	gi|1790041230|gb|QHB86943.1|	Escherichia coli BL21-AI	QHB86943.1	20.4	53.815	glutamate--tRNA ligase		ligase		11	11	22.4552	17	12	3	0	1	1		1						19.0369	17.6773	21.6224	21.6777		20.265					18.9698		18.4336	19.7074	18.7251	16.6294			21.077	20.9009	22.0564	22.4552	20.8984	21.9484
gi|1790039749|gb|QHB85462.1|	gi|1790039749|gb|QHB85462.1|	Escherichia coli BL21-AI	QHB85462.1	35.4	63.477	glutamine--tRNA ligase		ligase		17	17	22.5599	19	12	3	0	1	1		1						18.67	18.3901	20.6576	20.849		19.6666					18.2111	18.8318	18.5598	19.0771	19.1288	17.6439		18.3975	21.1438	16.8572	22.5599	22.0693	19.9107	21.0307
gi|1790042291|gb|QHB88004.1|	gi|1790042291|gb|QHB88004.1|	Escherichia coli BL21-AI	QHB88004.1	36.3	34.716	glycine--tRNA ligase subunit alpha		ligase		9	9	22.7524	16	14	4	0	1	1	1	1							17.6343	22.1493	22.0429	17.3571	19.8839									16.8921			18.3765	21.3092	21.7897	22.7461	22.7524	21.5698	22.7063
gi|1790042290|gb|QHB88003.1|	gi|1790042290|gb|QHB88003.1|	Escherichia coli BL21-AI	QHB88003.1	54	76.812	glycine--tRNA ligase subunit beta		ligase		34	34	24.4545	20	12	3	0	1	1		1						18.016	17.0992	23.4438	22.8709		20.5111					19.1403	16.2044	17.1391	19.5803	20.1163	15.5628	15.4834	17.2342	22.6908	22.8817	23.7481	24.4545	21.6754	23.6916
gi|1790041328|gb|QHB87041.1|	gi|1790041328|gb|QHB87041.1|	Escherichia coli BL21-AI	QHB87041.1	34.2	47.029	histidine--tRNA ligase		ligase		11	11	20.4412	8	7	2	0	1	1								18.036		19.0491	19.6094							18.036								18.3521	17.26	20.1431	20.4412	19.3508	20.3443
gi|1790039206|gb|QHB84919.1|	gi|1790039206|gb|QHB84919.1|	Escherichia coli BL21-AI	QHB84919.1	27.8	104.31	isoleucine--tRNA ligase		ligase		19	19	21.9259	20	12	3	0	1	1		1						17.5243	17.1157	21.0039	20.3233		19.0359					18.663	16.7125	16.6221	18.0994	19.2476	17.0595	16.4563	15.6995	20.9617	19.9242	21.2037	21.9259	19.9813	20.9823
gi|1790039725|gb|QHB85438.1|	gi|1790039725|gb|QHB85438.1|	Escherichia coli BL21-AI	QHB85438.1	27	97.248	leucine--tRNA ligase		ligase		24	24	22.5108	19	12	3	0	1	1		1						17.2326	17.8318	21.5934	20.9103		18.9415					18.1846	17.5263	15.0748	18.1444	18.593	17.2377		17.6648	21.0463	20.974	21.8426	22.5108	20.3277	21.0969
gi|1790041630|gb|QHB87343.1|	gi|1790041630|gb|QHB87343.1|	Escherichia coli BL21-AI	QHB87343.1	69.5	57.603	lysine--tRNA ligase		ligase		36	21	23.6477	19	12	3	0	1	1		1						18.6084	18.0297	21.4678	22.3199		19.2709					19.4661	17.0782		19.281	17.1778	17.0693	18.7503	19.1215	20.604	19.9039	22.8582	22.505	20.7136	22.4521
gi|1790042836|gb|QHB88549.1|	gi|1790042836|gb|QHB88549.1|	Escherichia coli BL21-AI	QHB88549.1	86.9	57.84	lysine--tRNA ligase		ligase		48	33	26.7972	16	8	2	0	1	1								24.2796	23.6794	25.9659	26.1356							24.6799	24.1764	24.1037	24.1585	23.8414	24.0736	23.1738	23.6289	25.7269	25.5192	26.17	26.4476	25.3142	26.212
gi|1790040981|gb|QHB86694.1|	gi|1790040981|gb|QHB86694.1|	Escherichia coli BL21-AI	QHB86694.1	40.2	76.209	methionine--tRNA ligase		ligase		22	22	22.9305	19	12	3	0	1	1		1						17.0344	16.856	22.0471	21.5138		18.7					15.8472	16.9456	16.182	19.1627	17.6568		15.8733	17.038	21.3203	21.1261	22.8114	22.9305	21.2413	21.8027
gi|1790039302|gb|QHB85015.1|	gi|1790039302|gb|QHB85015.1|	Escherichia coli BL21-AI	QHB85015.1	42	31.625	pantoate--beta-alanine ligase		ligase		10	10	22.4858	10	10	2	1	1	1					1					21.0915	20.5482					17.3118										20.9991	19.4456	21.4355	22.4858	19.9553	21.0351
gi|1790040683|gb|QHB86396.1|	gi|1790040683|gb|QHB86396.1|	Escherichia coli BL21-AI	QHB86396.1	52.9	36.831	phenylalanine--tRNA ligase subunit alpha		ligase		15	15	23.6552	20	12	3	0	1	1		1						17.584	17.6845	22.495	23.324		20.7798					17.7769	16.5298	17.4684	18.5607	18.8641	17.8921	16.0879	17.8939	21.903	21.8018	22.7467	23.5287	22.8715	23.6552
gi|1790040682|gb|QHB86395.1|	gi|1790040682|gb|QHB86395.1|	Escherichia coli BL21-AI	QHB86395.1	19.6	87.377	phenylalanine--tRNA ligase subunit beta		ligase		13	13	22.1423	14	8	2	0	1	1								19.0462	18.7481	20.7251	19.953								20.4811	19.5233	17.1342	20.3207		17.8595	18.0642	19.8541	19.2653	21.6386	22.1423	20.7959	19.4315
gi|1790039361|gb|QHB85074.1|	gi|1790039361|gb|QHB85074.1|	Escherichia coli BL21-AI	QHB85074.1	76.6	63.622	proline--tRNA ligase		ligase		36	36	23.6346	23	16	4	0	1	1	1	1						17.8269	18.8055	22.7986	22.8909	18.9379	20.8024					18.2479	17.3679	18.0576	17.6342	18.4212	18.4496		19.5459	22.1208	22.2286	23.3753	23.4697	21.9058	22.9079
gi|1790039969|gb|QHB85682.1|	gi|1790039969|gb|QHB85682.1|	Escherichia coli BL21-AI	QHB85682.1	53	48.413	serine--tRNA ligase		ligase		16	16	22.6686	20	12	3	0	1	1		1						17.9366	17.2205	22.0697	21.7938		19.5869					18.7613	16.9106	16.8041	19.2704	17.4726	17.3798	17.7841	16.2454	21.9457	21.1148	22.6686	22.5498	21.3855	22.4544
gi|1790039794|gb|QHB85507.1|	gi|1790039794|gb|QHB85507.1|	Escherichia coli BL21-AI	QHB85507.1	49.8	29.777	succinate--CoA ligase subunit alpha		ligase		16	16	25.9931	20	12	3	0	1	1		1						22.8096	22.4677	25.2773	24.8024		23.4555					22.4122	22.8795	22.4985	23.448	22.5642	22.5548	22.1768	22.575	24.5631	24.8056	25.7475	25.9931	23.421	25.3404
gi|1790040686|gb|QHB86399.1|	gi|1790040686|gb|QHB86399.1|	Escherichia coli BL21-AI	QHB86399.1	34.7	74.013	threonine--tRNA ligase		ligase		23	23	22.8151	20	12	3	0	1	1		1						17.0977	18.9272	22.2106	21.8566		20.3983					16.1824	16.2817	17.3128	18.6137	19.5067	18.9542	18.7817	18.4664	21.5348	22.1014	22.391	22.8151	21.4182	22.3013
gi|1790042115|gb|QHB87828.1|	gi|1790042115|gb|QHB87828.1|	Escherichia coli BL21-AI	QHB87828.1	54.2	37.437	tryptophan--tRNA ligase		ligase		20	20	24.1292	19	15	4	0	1	1	1	1						18.7616	19.5001	23.157	23.0974	20.4972	21.1612								18.7616	20.109	18.8773	19.5141		24.1292	20.6023	23.9914	23.905	21.9339	23.4709
gi|1790040611|gb|QHB86324.1|	gi|1790040611|gb|QHB86324.1|	Escherichia coli BL21-AI	QHB86324.1	41.5	47.54	tyrosine--tRNA ligase		ligase		12	12	22.5972	20	14	3	1	1	1		1			1			16.4563	17.1937	21.7052	20.8772		18.4363			17.2146			15.4911	16.5725	17.3052	17.589		16.3414	17.6508	21.0911	20.5569	22.5972	22.5756	19.6931	21.1503
gi|1790039263|gb|QHB84976.1|	gi|1790039263|gb|QHB84976.1|	Escherichia coli BL21-AI	QHB84976.1	13.4	53.597	UDP-N-acetylmuramate--L-alanine ligase		ligase		3	3	21.0071	4	4	1	1	1							1				20.2431							16.9945											19.479	21.0071
gi|1790042935|gb|QHB88648.1|	gi|1790042935|gb|QHB88648.1|	Escherichia coli BL21-AI	QHB88648.1	10.1	49.879	UDP-N-acetylmuramate:L-alanyl-gamma-D-glutamyl-meso-diaminopimelate ligase		ligase		4	4	20.6304	10	10	3	0	1	1		1								18.6457	17.3927		16.4663													17.4495	17.5356	18.9671	20.6304	17.6463	18.4273
gi|1790039260|gb|QHB84973.1|	gi|1790039260|gb|QHB84973.1|	Escherichia coli BL21-AI	QHB84973.1	15.5	46.973	UDP-N-acetylmuramoyl-L-alanine--D-glutamate ligase		ligase		5	5	23.362	12	4	1	0	1									21.7355	21.9567	22.8841								22.399	20.8482	21.2094	22.4854	22.7015	20.3583	22.2439	22.5232	22.247	23.362	22.694	23.2334
gi|1790039257|gb|QHB84970.1|	gi|1790039257|gb|QHB84970.1|	Escherichia coli BL21-AI	QHB84970.1	21	53.33	UDP-N-acetylmuramoyl-L-alanyl-D-glutamate--2,6-diaminopimelate ligase		ligase		7	7	22.1555	15	15	2	3	1	1				1	1	1				20.3358	19.6644				15.6843	15.4852	15.7219									18.6559	22.1555	19.3556	21.1763		19.7828
gi|1790040190|gb|QHB85903.1|	gi|1790040190|gb|QHB85903.1|	Escherichia coli BL21-AI	QHB85903.1	25.9	51.569	adenylosuccinate lyase		lyase		13	13	22.1803	13	12	3	0	1	1		1							15.5873	21.6716	21.2899		19.558												15.5873	20.857	22.1803	21.4793	22.1698	20.5407	21.7444
gi|1790042690|gb|QHB88403.1|	gi|1790042690|gb|QHB88403.1|	Escherichia coli BL21-AI	QHB88403.1	18.2	50.318	argininosuccinate lyase		lyase		7	7	22.1973	19	12	3	0	1	1		1						18.1026	17.6831	21.1683	20.3301		19.6165					19.416	16.0036	18.4192	18.5717	18.237	17.9535		16.8588	20.8806	19.885	21.7103	22.1973	20.2092	20.3667
gi|1790042845|gb|QHB88558.1|	gi|1790042845|gb|QHB88558.1|	Escherichia coli BL21-AI	QHB88558.1	46.9	52.356	aspartate ammonia-lyase		lyase		24	24	26.4428	20	12	3	0	1	1		1						23.6616	23.618	25.7759	25.6851		24.5477					23.3054	23.3491	23.8766	24.1155	24.4934	23.4843	22.8509	23.6432	25.5465	25.0106	26.1036	26.4428	25.071	25.946
gi|1790041200|gb|QHB86913.1|	gi|1790041200|gb|QHB86913.1|	Escherichia coli BL21-AI	QHB86913.1	20.4	47.87	D-serine ammonia-lyase		lyase		9	9	21.0222	20	19	3	3	1	1		1		1	1	1			17.7427	20.2816	19.4562		18.1567		14.7593	15.6336	15.9469								17.7427	19.9805	19.8473	20.2766	21.0222	18.2003	20.6637
gi|1790042728|gb|QHB88441.1|	gi|1790042728|gb|QHB88441.1|	Escherichia coli BL21-AI	QHB88441.1	45.6	47.521	isocitrate lyase		lyase		16	16	23.872	20	12	3	0	1	1		1						19.0466	18.9295	22.8773	22.8482		21.2061					19.6597	18.7566	18.9264	18.8437	18.2949	19.1396	19.1427	19.141	22.1252	22.2597	23.872	23.2524	21.2363	23.4687
gi|1790041966|gb|QHB87679.1|	gi|1790041966|gb|QHB87679.1|	Escherichia coli BL21-AI	QHB87679.1	55.6	32.593	N-acetylneuraminate lyase		lyase		14	14	24.8623	18	12	3	0	1	1		1						18.4666	19.177	24.0882	22.7919		21.192					20.3949	15.7151		19.2897	19.5799		18.4557	19.4955	23.5163	23.4611	24.5132	24.8623	22.5491	23.3313
gi|1790039978|gb|QHB85691.1|	gi|1790039978|gb|QHB85691.1|	Escherichia coli BL21-AI	QHB85691.1	15.4	28.204	pyruvate formate lyase 1-activating protein		lyase		4	4	21.1944	12	12	3	0	1	1		1								19.961	20.0169		18.6531													18.7067	18.9434	20.9996	21.1944	18.7921	20.9212
gi|1790041458|gb|QHB87171.1|	gi|1790041458|gb|QHB87171.1|	Escherichia coli BL21-AI	QHB87171.1	43.9	19.416	S-ribosylhomocysteine lyase		lyase		6	6	24.7564	20	12	3	0	1	1		1						21.8153	19.979	24.052	23.3991		22.414					22.2297	21.9437	20.9389	22.1489	20.8515	21.5135	18.1368	19.4141	23.3795	23.3831	24.6891	24.7564	23.4786	23.6815
gi|1790043237|gb|QHB88950.1|	gi|1790043237|gb|QHB88950.1|	Escherichia coli BL21-AI	QHB88950.1	19.8	56.225	threonine ammonia-lyase, biosynthetic		lyase		8	8	15.1543	5	5	0	2							1	1										14.7345	14.3761
gi|1790040704|gb|QHB86417.1|	gi|1790040704|gb|QHB86417.1|	Escherichia coli BL21-AI	QHB86417.1	44	30.665	ammonia-dependent NAD(+) synthetase		NAD-related pathways		8	8	21.88	14	11	3	0	1	1		1						19.5352	18.2651	21.2936	20.9547		20.1343						19.5352			18.2666			18.2636	20.5568		21.4845	21.8396	21.0786	21.88
gi|1790040525|gb|QHB86238.1|	gi|1790040525|gb|QHB86238.1|	Escherichia coli BL21-AI	QHB86238.1	48.4	27.249	bifunctional NADP-dependent 3-hydroxy acid dehydrogenase/3-hydroxypropionate dehydrogenase YdfG	YdfG	NAD-related pathways		9	9	24.0872	18	11	3	0	1	1		1						20.0059	20.0977	23.0287	23.3796		21.6857					20.976		20.5542	18.4876	20.2931	20.3081	19.3948	20.3949	23.5124	20.9578	23.7272	23.9174	22.7312	23.5015
gi|1790041013|gb|QHB86726.1|	gi|1790041013|gb|QHB86726.1|	Escherichia coli BL21-AI	QHB86726.1	16.5	45.068	NAD-dependent dihydropyrimidine dehydrogenase subunit PreA	PreA	NAD-related pathways		7	7	21.4303	11	11	3	0	1	1		1								20.4334	19.7858		17.3412													19.8905		21.4303	19.9794	19.6085	20.6229
gi|1790041012|gb|QHB86725.1|	gi|1790041012|gb|QHB86725.1|	Escherichia coli BL21-AI	QHB86725.1	24.8	44.329	NAD-dependent dihydropyrimidine dehydrogenase subunit PreT	PreT	NAD-related pathways		7	7	19.0225	7	7	2	1	1	1			1							18.4554	18.5444			15.1621												17.4336		19.0225	18.9101		18.4302
gi|1790040897|gb|QHB86610.1|	gi|1790040897|gb|QHB86610.1|	Escherichia coli BL21-AI	QHB86610.1	17.2	29.68	NAD-dependent epimerase/dehydratase family protein		NAD-related pathways		5	5	20.5836	12	12	3	0	1	1		1								19.779	19.5087		17.6184													18.8635	19.7264	19.9426	20.5836	17.8695	20.4129
gi|1790040728|gb|QHB86441.1|	gi|1790040728|gb|QHB86441.1|	Escherichia coli BL21-AI	QHB86441.1	41.5	20.059	NAD(P)H nitroreductase	ydjA	NAD-related pathways		8	8	23.1799	29	27	4	4	1	1	1	1	1	1	1	1			18.3232	22.3151	20.0325	19.7551	19.8238	17.6253	17.0216	17.9405	17.069					18.6965			17.95	21.6297	21.7595	23.1799	22.6914	19.201	21.228
gi|1790042344|gb|QHB88057.1|	gi|1790042344|gb|QHB88057.1|	Escherichia coli BL21-AI	QHB88057.1	26.3	36.361	NAD(P)H-dependent glycerol-3-phosphate dehydrogenase		NAD-related pathways		6	6	20.2186	2	2	1	0	1											19.8179																		20.2186	19.4172
gi|1790040078|gb|QHB85791.1|	gi|1790040078|gb|QHB85791.1|	Escherichia coli BL21-AI	QHB85791.1	63.6	20.845	NAD(P)H:quinone oxidoreductase		NAD-related pathways		12	12	23.4596	18	11	3	0	1	1		1						19.8024	20.2326	22.2398	22.486		21.4717					19.7004	17.641	20.3474	21.5206	22.1363		19.0039	19.5577	22.4671	20.0475	22.985	23.4596	21.7632	22.6516
gi|1790041140|gb|QHB86853.1|	gi|1790041140|gb|QHB86853.1|	Escherichia coli BL21-AI	QHB86853.1	29.5	25.056	NADH-quinone oxidoreductase subunit B	NuoB	NAD-related pathways		7	7	22.2983	21	21	4	3	1	1	1	1	1	1		1				21.7218	20.2017	18.5614	19.5008	17.567	15.3158		15.8164									21.2196		21.6474	22.2983	20.4783	20.8882
gi|1790041139|gb|QHB86852.1|	gi|1790041139|gb|QHB86852.1|	Escherichia coli BL21-AI	QHB86852.1	27.3	68.724	NADH-quinone oxidoreductase subunit C/D		NAD-related pathways		14	14	21.8926	13	12	3	0	1	1		1						15.4758		21.2035	20.2438		18.2476								15.4758					20.2173	20.818	21.8926	21.8861	19.5596	21.0776
gi|1790041133|gb|QHB86846.1|	gi|1790041133|gb|QHB86846.1|	Escherichia coli BL21-AI	QHB86846.1	4.3	19.874	NADH-quinone oxidoreductase subunit J		NAD-related pathways		1	1	23.2571	8	4	1	0	1									19.9951	20.7124	22.677											19.9951	20.912		20.5491	20.676	22.0346	22.6883	22.7281	23.2571
gi|1790041131|gb|QHB86844.1|	gi|1790041131|gb|QHB86844.1|	Escherichia coli BL21-AI	QHB86844.1	4.6	66.467	NADH-quinone oxidoreductase subunit L		NAD-related pathways		2	2	22.4466	15	12	3	0	1	1		1						18.1486	17.8048	21.4952	21.2749		20.946					18.1486					18.6509	16.9588		20.0367	22.4466	21.9155	21.582	21.1587	21.5877
gi|1790041130|gb|QHB86843.1|	gi|1790041130|gb|QHB86843.1|	Escherichia coli BL21-AI	QHB86843.1	3.1	56.524	NADH-quinone oxidoreductase subunit M		NAD-related pathways		2	2	20.9947	4	4	2	0	1	1										20.1799	19.1337															19.365	20.9947			18.9898	19.2777
gi|1790041141|gb|QHB86854.1|	gi|1790041141|gb|QHB86854.1|	Escherichia coli BL21-AI	QHB86854.1	19	16.457	NADH-quinone oxidoreductase subunit NuoA	NuoA	NAD-related pathways		3	3	23.1072	13	12	3	0	1	1		1							18.9326	22.4444	20.8795		20.0614										18.9326			21.3417	23.1072	22.9616	22.3673	21.411	20.8135
gi|1790041137|gb|QHB86850.1|	gi|1790041137|gb|QHB86850.1|	Escherichia coli BL21-AI	QHB86850.1	40	49.292	NADH-quinone oxidoreductase subunit NuoF	NuoF	NAD-related pathways		18	18	22.7278	20	16	4	0	1	1	1	1						17.4177	16.338	21.8279	21.8124	17.9992	20.3062							17.4641	17.3714	16.6579		16.0182		21.7042	20.7101	22.1696	22.7278	20.9182	22.2394
gi|1790041136|gb|QHB86849.1|	gi|1790041136|gb|QHB86849.1|	Escherichia coli BL21-AI	QHB86849.1	23.9	100.23	NADH-quinone oxidoreductase subunit NuoG	NuoG	NAD-related pathways		17	17	21.7784	16	8	2	0	1	1								19.6988	18.3614	20.9714	20.5115							20.2689	18.7893	19.424	20.3129	19.1511	18.5745	18.9695	16.7503	20.1125	20.5801	21.4147	21.7784	20.3986	20.804
gi|1790041135|gb|QHB86848.1|	gi|1790041135|gb|QHB86848.1|	Escherichia coli BL21-AI	QHB86848.1	4	36.219	NADH-quinone oxidoreductase subunit NuoH	NuoH	NAD-related pathways		2	2	23.0826	9	4	1	0	1									20.7264	20.7626	22.1133								20.5557		20.897			21.444	20.5068	20.3369	21.2565	23.0826	22.0433	22.0709
gi|1790041134|gb|QHB86847.1|	gi|1790041134|gb|QHB86847.1|	Escherichia coli BL21-AI	QHB86847.1	13.9	20.538	NADH-quinone oxidoreductase subunit NuoI	NuoI	NAD-related pathways		1	1	21.0143	2	2	1	0	1											20.0597																19.1052			21.0143
gi|1790040195|gb|QHB85908.1|	gi|1790040195|gb|QHB85908.1|	Escherichia coli BL21-AI	QHB85908.1	56	45.769	NADP-dependent isocitrate dehydrogenase		NAD-related pathways		28	28	26.1835	20	12	3	0	1	1		1						23.2565	22.6108	25.4635	25.0383		24.045					23.2266	22.9808	22.9927	23.8261	23.2869	22.7998	22.1852	22.1713	24.6564	25.0565	25.9576	26.1835	24.7409	25.3331
gi|1790041277|gb|QHB86990.1|	gi|1790041277|gb|QHB86990.1|	Escherichia coli BL21-AI	QHB86990.1	15.8	82.446	NADP-dependent oxaloacetate-decarboxylating malate dehydrogenase		NAD-related pathways		10	10	20.8806	18	12	3	0	1	1		1						15.9996	17.0567	20.2056	19.787		18.692					15.6526	16.5553	15.323	16.4674	16.4743	17.6391			19.4784	19.8206	20.6428	20.8806	19.4779	19.7195
gi|1790040907|gb|QHB86620.1|	gi|1790040907|gb|QHB86620.1|	Escherichia coli BL21-AI	QHB86620.1	56.6	51.496	NADP-dependent phosphogluconate dehydrogenase		NAD-related pathways		17	17	23.4574	16	8	2	0	1	1								21.2181	20.3996	23.1811	22.6697							20.022	21.433	21.3027	22.1147	21.5386	20.1492	19.42	20.4904	22.9837	22.8425	23.4409	23.4574	22.4495	22.6203
gi|1790041433|gb|QHB87146.1|	gi|1790041433|gb|QHB87146.1|	Escherichia coli BL21-AI	QHB87146.1	13.9	51.793	NADP-dependent succinate-semialdehyde dehydrogenase		NAD-related pathways		5	5	17.5075	8	2	1	0	1									14.7878	14.6457	17.1456								14.8493	14.8939	14.1771	15.2308		14.5372		14.7542		16.7837		17.5075
gi|1790040724|gb|QHB86437.1|	gi|1790040724|gb|QHB86437.1|	Escherichia coli BL21-AI	QHB86437.1	23	48.581	NADP-specific glutamate dehydrogenase		NAD-related pathways		8	8	19.4284	24	24	2	4	1	1			1	1	1	1				18.2659	18.2359			16.3331	15.7176	17.7431	16.3653									17.4755	16.8671	19.4284	19.2924	18.2634	18.0958
gi|1790041591|gb|QHB87304.1|	gi|1790041591|gb|QHB87304.1|	Escherichia coli BL21-AI	QHB87304.1	14.2	38.499	NADP(H)-dependent aldo-keto reductase		NAD-related pathways		4	4	22.2075	9	8	2	0	1	1								18.2199		21.4486	21.1268										18.2199					20.9981	20.5276	22.0613	22.2075	20.893	21.1359
gi|1790039444|gb|QHB85157.1|	gi|1790039444|gb|QHB85157.1|	Escherichia coli BL21-AI	QHB85157.1	11.2	37.978	NADPH-dependent aldehyde reductase YahK	YahK	NAD-related pathways		4	4	20.411	18	15	4	0	1	1	1	1					1.1.1.372	16.9273	16.902	19.6126	19.568	19.7215	17.9163					16.6963			17.1584	16.902				19.8621	18.5742	19.8596	20.1546	19.3895	18.7957
gi|1790041785|gb|QHB87498.1|	gi|1790041785|gb|QHB87498.1|	Escherichia coli BL21-AI	QHB87498.1	5.2	21.879	NADPH:quinone oxidoreductase MdaB	MdaB	NAD-related pathways		1	1	19.5358	8	2	1	0	1									17.9575	17.0585	18.8214								17.3582	17.6261	18.2187	18.6271			17.1098	17.0072		18.107	19.5358
gi|1790042763|gb|QHB88476.1|	gi|1790042763|gb|QHB88476.1|	Escherichia coli BL21-AI	QHB88476.1	31.5	35.171	NADPH:quinone reductase		NAD-related pathways		7	7	21.3232	12	12	3	0	1	1		1								19.8395	19.8024		19.2794													20.2474	17.5327	20.2549	21.3232	19.9766	20.0009
gi|1790039665|gb|QHB85378.1|	gi|1790039665|gb|QHB85378.1|	Escherichia coli BL21-AI	QHB85378.1	51.6	23.885	oxygen-insensitive NAD(P)H nitroreductase		NAD-related pathways		8	8	24.3124	20	12	3	0	1	1		1						20.6968	20.3584	23.5646	23.2495		22.3828					20.1661	21.3579	19.9461	21.3172	21.2579	20.27	19.9897	19.916	22.9262	23.1888	23.831	24.3124	22.5054	23.5225
gi|1790040577|gb|QHB86290.1|	gi|1790040577|gb|QHB86290.1|	Escherichia coli BL21-AI	QHB86290.1	8	54.653	Re/Si-specific NAD(P)(+) transhydrogenase subunit alpha		NAD-related pathways		3	3	19.3299	6	6	1	1	1							1				18.912							14.6221									18.5878	19.3299	18.4584	19.272
gi|1790040576|gb|QHB86289.1|	gi|1790040576|gb|QHB86289.1|	Escherichia coli BL21-AI	QHB86289.1	11.7	48.722	Re/Si-specific NAD(P)(+) transhydrogenase subunit beta		NAD-related pathways		5	5	21.8782	12	11	4	0	1	1	1	1							17.5801	20.0058	19.1502	16.7808	18.1145										17.5801			19.2022	19.1019	19.8408	21.8782		19.6409
gi|1790042692|gb|QHB88405.1|	gi|1790042692|gb|QHB88405.1|	Escherichia coli BL21-AI	QHB88405.1	53.2	51.576	Si-specific NAD(P)(+) transhydrogenase		NAD-related pathways		16	16	22.7453	12	4	1	0		1								21.0524	21.1234		21.9184							20.8404	21.2921	20.7404	21.3366	21.4479	21.5877	20.6903	20.7679					20.6615	22.1897
gi|1790042581|gb|QHB88294.1|	gi|1790042581|gb|QHB88294.1|	Escherichia coli BL21-AI	QHB88294.1	8.2	26.242	NAD(P)H-flavin reductase		NAD-related pathways; flavoprotein		2	2	20.9947	10	10	3	0	1	1		1								20.2459	19.7063		18.6923													18.8383		20.9047	20.9947	19.2711	20.2118
gi|1790039227|gb|QHB84940.1|	gi|1790039227|gb|QHB84940.1|	Escherichia coli BL21-AI	QHB84940.1	6.2	30.42	16S rRNA (adenine(1518)-N(6)/adenine(1519)-N(6))-dimethyltransferase RsmA	RsmA	transferase		2	2	20.7802	8	8	2	0	1	1										18.6674	18.7435															17.5354	18.5613	19.3742	19.1986	17.415	20.7802
gi|1790041896|gb|QHB87609.1|	gi|1790041896|gb|QHB87609.1|	Escherichia coli BL21-AI	QHB87609.1	15.4	31.348	16S rRNA (cytidine(1402)-2-O)-methyltransferase		transferase		3	3	20.649	6	6	2	0	1	1										19.6071	17.689																	18.5653	20.649	15.4896	18.7472
gi|1790039254|gb|QHB84967.1|	gi|1790039254|gb|QHB84967.1|	Escherichia coli BL21-AI	QHB84967.1	11.8	34.877	16S rRNA (cytosine(1402)-N(4))-methyltransferase RsmH	RsmH	transferase		3	3	19.0528	7	7	2	0	1	1										18.663	18.6922															18.1825	18.749	18.7181	19.0025		18.9243
gi|1790043057|gb|QHB88770.1|	gi|1790043057|gb|QHB88770.1|	Escherichia coli BL21-AI	QHB88770.1	12.2	37.624	16S rRNA (guanine(1207)-N(2))-methyltransferase RsmC	RsmC	transferase		4	4	18.8393	10	10	2	2	1	1			1	1						17.2842	16.8319			12.3718	13.766											16.8517	16.2641	17.1819	18.8393		17.0969
gi|1790039792|gb|QHB85505.1|	gi|1790039792|gb|QHB85505.1|	Escherichia coli BL21-AI	QHB85505.1	54.6	44.011	2-oxoglutarate dehydrogenase complex dihydrolipoyllysine-residue succinyltransferase		transferase		26	26	25.0744	19	12	3	0	1	1		1						19.5684	18.6014	24.6264	24.4465		23.5903					20.1152	19.4333	16.7823	21.9429	19.7695	17.9764		18.0583	24.243	24.2481	24.9562	25.0584	23.8762	24.7132
gi|1790039333|gb|QHB85046.1|	gi|1790039333|gb|QHB85046.1|	Escherichia coli BL21-AI	QHB85046.1	58.4	29.892	2,3,4,5-tetrahydropyridine-2,6-dicarboxylate N-succinyltransferase		transferase		20	20	25.8319	20	12	3	0	1	1		1						21.8921	20.9584	25.2026	24.7485		24.2749					22.5127	22.7783	20.0447	22.2326	21.0457	22.4961	19.4704	20.8213	24.8723	24.571	25.5351	25.8319	24.4817	25.1435
gi|1790042228|gb|QHB87941.1|	gi|1790042228|gb|QHB87941.1|	Escherichia coli BL21-AI	QHB87941.1	13.2	31.944	23S rRNA (adenine(2030)-N(6))-methyltransferase RlmJ	RlmJ	transferase		3	3	17.4439	2	2	1	0	1											16.8371																16.2303	17.4439
gi|1790041927|gb|QHB87640.1|	gi|1790041927|gb|QHB87640.1|	Escherichia coli BL21-AI	QHB87640.1	9.6	23.335	23S rRNA (uridine(2552)-2-O)-methyltransferase RlmE	RlmE	transferase		2	2	20.8667	5	5	2	0	1	1										19.7146	20.7159																20.5204	20.4723	18.151
gi|1790039994|gb|QHB85707.1|	gi|1790039994|gb|QHB85707.1|	Escherichia coli BL21-AI	QHB85707.1	28.6	27.614	3-deoxy-manno-octulosonate cytidylyltransferase		transferase		5	5	20.5316	13	13	3	1	1	1		1			1					19.9856	19.2594		19.2189			15.7176										18.7956	20.3286	20.2865	20.5316	18.4058	19.8189
gi|1790041335|gb|QHB87048.1|	gi|1790041335|gb|QHB87048.1|	Escherichia coli BL21-AI	QHB87048.1	40.9	30.811	3-mercaptopyruvate sulfurtransferase		transferase		8	8	21.4999	12	12	2	2	1	1					1	1				20.6884	19.81					17.3772	16.171									20.7393		19.9906	21.3353	18.724	21.4999
gi|1790039303|gb|QHB85016.1|	gi|1790039303|gb|QHB85016.1|	Escherichia coli BL21-AI	QHB85016.1	15.9	28.121	3-methyl-2-oxobutanoate hydroxymethyltransferase		transferase		3	3	22.751	16	11	3	0	1	1		1						19.0849	19.1566	21.3315	21.5256		20.114					19.2083		18.7516	19.2949			18.925	19.3882	20.1416	21.1429	21.2904	22.751	21.0117	21.6531
gi|1790039984|gb|QHB85697.1|	gi|1790039984|gb|QHB85697.1|	Escherichia coli BL21-AI	QHB85697.1	8.2	46.081	3-phosphoshikimate 1-carboxyvinyltransferase		transferase		3	3	18.7915	6	6	3	0	1	1		1								18.5075	17.7013		16.6498													18.7915			18.2235		18.2477
gi|1790042554|gb|QHB88267.1|	gi|1790042554|gb|QHB88267.1|	Escherichia coli BL21-AI	QHB88267.1	28.2	84.727	5-methyltetrahydropteroyltriglutamate--homocysteine S-methyltransferase		transferase		20	20	23.0226	16	8	2	0	1	1								20.404	19.7755	22.3531	21.6735							19.87	20.0983	20.4757	21.172	19.7014	20.4962	19.0626	19.8419	21.8358	22.3429	22.2111	23.0226	21.0604	21.6981
gi|1790041183|gb|QHB86896.1|	gi|1790041183|gb|QHB86896.1|	Escherichia coli BL21-AI	QHB86896.1	8.7	35.041	50S ribosomal protein L3 N(5)-glutamine methyltransferase		transferase		3	3	21.739	10	10	3	0	1	1		1								20.5616	20.8099		19.4933													19.8885	19.8141	20.805	21.739	20.1336	21.306
gi|1790039351|gb|QHB85064.1|	gi|1790039351|gb|QHB85064.1|	Escherichia coli BL21-AI	QHB85064.1	45.5	35.287	acetyl-CoA carboxylase carboxyl transferase subunit alpha		transferase		15	15	23.2575	14	12	3	0	1	1		1						15.9693		22.0173	22.3378		20.8403						16.9308		15.0078					21.8586	21.0584	21.8947	23.2575	21.6856	22.9196
gi|1790040154|gb|QHB85867.1|	gi|1790040154|gb|QHB85867.1|	Escherichia coli BL21-AI	QHB85867.1	20.1	32.417	ACP S-malonyltransferase		transferase		5	5	21.9684	13	11	3	0	1	1		1						16.6524		20.8105	19.7418		17.6153							16.3712	16.9336					19.8975	19.7189	21.657	21.9684	17.2422	20.0378
gi|1790039347|gb|QHB85060.1|	gi|1790039347|gb|QHB85060.1|	Escherichia coli BL21-AI	QHB85060.1	22.9	28.08	acyl-ACP--UDP-N-acetylglucosamine O-acyltransferase		transferase		4	4	22.8507	9	4	1	0	1									19.2874	19.0093	21.7828								19.1425	18.8271	19.7897	19.3902		19.0093			21.4204	20.9368	21.9232	22.8507
gi|1790040004|gb|QHB85717.1|	gi|1790040004|gb|QHB85717.1|	Escherichia coli BL21-AI	QHB85717.1	52.8	43.573	aminotransferase class I/II-fold pyridoxal phosphate-dependent enzyme		transferase		20	20	26.1352	20	12	3	0	1	1		1						23.2692	22.7388	25.5156	25.1061		24.0752					23.1763	22.985	23.3061	23.6094	23.386	22.5993	22.4217	22.5483	24.9178	25.0962	25.913	26.1352	24.5849	25.3414
gi|1790041365|gb|QHB87078.1|	gi|1790041365|gb|QHB87078.1|	Escherichia coli BL21-AI	QHB87078.1	45.8	45.316	aminotransferase class I/II-fold pyridoxal phosphate-dependent enzyme		transferase		25	25	26.3407	20	12	3	0	1	1		1						23.1038	22.9505	25.5636	24.9422		24.0925					23.0486	22.8583	22.8442	23.6643	23.498	22.9761	22.3224	23.0055	24.9696	25.1892	25.755	26.3407	24.6533	25.2816
gi|1790041143|gb|QHB86856.1|	gi|1790041143|gb|QHB86856.1|	Escherichia coli BL21-AI	QHB86856.1	6.7	45.517	aminotransferase class I/II-fold pyridoxal phosphate-dependent enzyme		transferase		3	3	16.8052	11	11	3	0	1	1		1								16.002	15.6764		15.0258													14.7515	16.5464	16.6251	16.0848	15.2264	16.8052
gi|1790040916|gb|QHB86629.1|	gi|1790040916|gb|QHB86629.1|	Escherichia coli BL21-AI	QHB86629.1	16.5	41.369	aminotransferase class I/II-fold pyridoxal phosphate-dependent enzyme		transferase		5	5	21.5176	6	6	2	0	1	1										20.3447	19.9474															20.097	19.4196		21.5176	19.4806	20.1509
gi|1790042947|gb|QHB88660.1|	gi|1790042947|gb|QHB88660.1|	Escherichia coli BL21-AI	QHB88660.1	12.2	34.427	aspartate carbamoyltransferase		transferase		3	3	19.9519	10	7	2	0	1	1								17.064		19.0715	18.8136								17.2387	16.8819	17.0714					18.3762		18.8863	19.9519	17.9344	19.8555
gi|1790040898|gb|QHB86611.1|	gi|1790040898|gb|QHB86611.1|	Escherichia coli BL21-AI	QHB86611.1	22.7	33.351	ATP phosphoribosyltransferase		transferase		5	5	20.7294	3	3	1	0		1											19.6323																				19.4657
gi|1790040023|gb|QHB85736.1|	gi|1790040023|gb|QHB85736.1|	Escherichia coli BL21-AI	QHB85736.1	3.4	78.853	bifunctional 23S rRNA (guanine(2069)-N(7))-methyltransferase RlmK/23S rRNA (guanine(2445)-N(2))-methyltransferase RlmL	RmlL	transferase		2	2	16.8096	4	4	2	0	1	1										15.8365	14.3407															16.8096		14.8633		13.5739	15.1075
gi|1790041089|gb|QHB86802.1|	gi|1790041089|gb|QHB86802.1|	Escherichia coli BL21-AI	QHB86802.1	9.6	26.585	bifunctional 3-demethylubiquinone 3-O-methyltransferase/2-octaprenyl-6-hydroxy phenol methylase		transferase		1	1	16.5825	2	2	0	1							1											16.1762
gi|1790041807|gb|QHB87520.1|	gi|1790041807|gb|QHB87520.1|	Escherichia coli BL21-AI	QHB87520.1	22.6	51.05	bifunctional D-glycero-beta-D-manno-heptose-7-phosphate kinase/D-glycero-beta-D-manno-heptose 1-phosphate adenylyltransferase HldE	HldE	transferase		7	7	20.8919	15	14	4	0	1	1	1	1							18.7454	19.184	19.437	18.6125	18.9573									18.7454				17.3219	18.7995	19.7228	20.8919	18.2533	20.2912
gi|1790042572|gb|QHB88285.1|	gi|1790042572|gb|QHB88285.1|	Escherichia coli BL21-AI	QHB88285.1	21.9	28.085	bifunctional demethylmenaquinone methyltransferase/2-methoxy-6-polyprenyl-1,4-benzoquinol methylase UbiE	UbiE	transferase		5	5	22.596	14	12	3	0	1	1		1							17.275	21.9257	21.4521		20.5803										15.2648		19.2852	21.2918	21.7006	22.1145	22.596	21.24	21.8656
gi|1790042469|gb|QHB88182.1|	gi|1790042469|gb|QHB88182.1|	Escherichia coli BL21-AI	QHB88182.1	18.4	49.19	bifunctional UDP-N-acetylglucosamine diphosphorylase/glucosamine-1-phosphate N-acetyltransferase GlmU	GlmU	transferase		6	6	20.3992	12	11	3	0	1	1		1						13.9521		18.8027	18.4142		17.2754								13.9521					18.7663	18.8745	17.1709	20.3992	17.5126	18.8601
gi|1790041400|gb|QHB87113.1|	gi|1790041400|gb|QHB87113.1|	Escherichia coli BL21-AI	QHB87113.1	19.7	52.801	CDP-diacylglycerol--serine O-phosphatidyltransferase		transferase		6	6	20.4347	14	12	3	0	1	1		1						14.8529	15.7931	19.4411	18.8569		16.3949							14.8529				15.7931		17.2719	20.1357	19.9221	20.4347	16.7654	20.1887
gi|1790039979|gb|QHB85692.1|	gi|1790039979|gb|QHB85692.1|	Escherichia coli BL21-AI	QHB85692.1	60.7	85.356	formate C-acetyltransferase		transferase		41	36	25.0167	20	12	3	0	1	1		1						21.533	21.6351	24.2833	24.1106		22.6632					22.3764	20.9286	20.8528	21.9742	22.2773	20.9589	21.7475	21.5566	23.754	23.8291	24.5336	25.0167	23.4134	24.5665
gi|1790042161|gb|QHB87874.1|	gi|1790042161|gb|QHB87874.1|	Escherichia coli BL21-AI	QHB87874.1	5.6	48.697	glucose-1-phosphate adenylyltransferase		transferase		2	2	18.254	2	2	1	0	1											17.1938																16.1335		18.254
gi|1790040919|gb|QHB86632.1|	gi|1790040919|gb|QHB86632.1|	Escherichia coli BL21-AI	QHB86632.1	36.6	32.453	glucose-1-phosphate thymidylyltransferase RfbA	RfbA	transferase		9	9	20.928	9	7	2	0	1	1								17.2218	16.8648	19.1886	19.0172										17.2218	16.8648				19.353	18.7345	19.5746	19.0925		18.6938
gi|1790039891|gb|QHB85604.1|	gi|1790039891|gb|QHB85604.1|	Escherichia coli BL21-AI	QHB85604.1	21.6	23.713	glutathione S-transferase		transferase		5	5	21.7585	12	12	3	0	1	1		1								20.5894	20.492		19.5795													18.76	20.3208	21.5182	21.7585	19.7238	21.097
gi|1790040609|gb|QHB86322.1|	gi|1790040609|gb|QHB86322.1|	Escherichia coli BL21-AI	QHB86322.1	38.3	22.868	glutathione transferase GstA	GstA	transferase		6	6	23.5789	20	12	3	0	1	1		1						19.4258	18.7646	22.8934	22.2273		20.7095					18.6443	19.8856	19.1301	20.0433	19.5613	18.692	18.1307	18.6742	22.3868	22.2656	23.3423	23.5789	22.0247	22.6863
gi|1790042353|gb|QHB88066.1|	gi|1790042353|gb|QHB88066.1|	Escherichia coli BL21-AI	QHB88066.1	55.3	43.044	glycine C-acetyltransferase		transferase		21	21	25.895	20	12	3	0	1	1		1						22.1673	21.3794	24.9951	24.6748		23.5353					21.8257	21.7304	22.3679	22.7452	21.3804	21.4004	21.5843	21.1525	24.1634	24.4849	25.4371	25.895	23.9868	25.0765
gi|1790041645|gb|QHB87358.1|	gi|1790041645|gb|QHB87358.1|	Escherichia coli BL21-AI	QHB87358.1	39.3	40.146	glycine cleavage system aminomethyltransferase GcvT	GcvT	transferase		11	11	24.1181	20	12	3	0	1	1		1						21.0883	20.4029	23.5638	23.2581		21.8815					21.6744	20.2955	21.1205	21.263	21.9289	20.8096	18.1147	20.7583	23.2674	23.143	23.7266	24.1181	23.063	23.1944
gi|1790041906|gb|QHB87619.1|	gi|1790041906|gb|QHB87619.1|	Escherichia coli BL21-AI	QHB87619.1	13.2	18.534	GNAT family N-acetyltransferase		transferase		1	1	20.4453	2	2	1	0		1											20.0572																				19.6692
gi|1790039294|gb|QHB85007.1|	gi|1790039294|gb|QHB85007.1|	Escherichia coli BL21-AI	QHB85007.1	60.1	20.115	hypoxanthine phosphoribosyltransferase		transferase		9	9	23.0207	9	9	2	1	1	1					1					21.4672	21.8349					19.2113										21.696	19.4949	23.0207	21.6572		21.4166
gi|1790041679|gb|QHB87392.1|	gi|1790041679|gb|QHB87392.1|	Escherichia coli BL21-AI	QHB87392.1	55.2	41.951	methionine adenosyltransferase		transferase		17	17	24.4373	20	12	3	0	1	1		1						19.8307	19.799	23.5304	23.6854		22.0393					20.5817	19.2641	19.2548	20.2222	20.4764	19.8187	19.2313	19.6696	23.4535	22.9562	23.8478	23.864	22.8211	24.4373
gi|1790042019|gb|QHB87732.1|	gi|1790042019|gb|QHB87732.1|	Escherichia coli BL21-AI	QHB87732.1	18.7	34.168	methionyl-tRNA formyltransferase		transferase		3	3	19.1787	4	4	2	0	1	1										18.4422	18.6221															17.7057			19.1787		18.5263
gi|1790039192|gb|QHB84905.1|	gi|1790039192|gb|QHB84905.1|	Escherichia coli BL21-AI	QHB84905.1	9.2	21.164	molybdopterin adenylyltransferase		transferase		2	2	20.3456	5	4	2	0	1	1									17.3667	19.5191	19.5374													17.3667		18.6926			20.3456
gi|1790039882|gb|QHB85595.1|	gi|1790039882|gb|QHB85595.1|	Escherichia coli BL21-AI	QHB85595.1	17.5	44.136	molybdopterin molybdotransferase MoeA	MoeA	transferase		5	5	20.6766	10	10	3	0	1	1		1								19.7883	19.6727		17.093													19.4146	18.6289	20.6766	20.4331	19.6286	20.1457
gi|1790042372|gb|QHB88085.1|	gi|1790042372|gb|QHB88085.1|	Escherichia coli BL21-AI	QHB88085.1	32.9	23.567	orotate phosphoribosyltransferase		transferase		7	7	21.6422	5	5	2	0	1	1										20.2952	19.7592															21.1419	18.1014		21.6422		19.5725
gi|1790041150|gb|QHB86863.1|	gi|1790041150|gb|QHB86863.1|	Escherichia coli BL21-AI	QHB86863.1	46.9	77.171	phosphate acetyltransferase		transferase		28	28	24.3137	26	19	4	1	1	1	1	1			1			17.1951	17.8748	23.62	23.2668	18.4891	22.0294			18.0981		15.4715	17.9818		18.1319	18.6528	17.3529	17.7231	17.7706	22.7557	23.1767	24.234	24.3137	22.8264	23.8614
gi|1790039259|gb|QHB84972.1|	gi|1790039259|gb|QHB84972.1|	Escherichia coli BL21-AI	QHB84972.1	2.2	39.874	phospho-N-acetylmuramoyl-pentapeptide-transferase		transferase		1	1	20.7833	12	10	3	0	1	1		1						18.0578		20.5303	19.3386		19.5563					17.9926	18.1229								20.7833	20.2308	20.5766	18.8726	19.9202
gi|1790041240|gb|QHB86953.1|	gi|1790041240|gb|QHB86953.1|	Escherichia coli BL21-AI	QHB86953.1	75.8	63.533	phosphoenolpyruvate-protein phosphotransferase PtsI	PtsI	transferase		39	39	24.2641	19	12	3	0	1	1		1						18.7599	17.4327	23.3941	23.5959		21.9523					18.6043	18.7039	18.5315	19.1997	16.0339	18.1268		18.1373	23.194	22.2543	24.1597	23.9684	22.6876	24.1174
gi|1790042685|gb|QHB88398.1|	gi|1790042685|gb|QHB88398.1|	Escherichia coli BL21-AI	QHB88398.1	32.4	66.569	phosphoethanolamine transferase CptA	CptA	transferase		11	11	23.107	13	12	3	0	1	1		1						16.8208		22.4373	21.3541		20.0175					16.8208								21.4492	22.4245	22.7684	23.107	20.856	22.1454
gi|1790042823|gb|QHB88536.1|	gi|1790042823|gb|QHB88536.1|	Escherichia coli BL21-AI	QHB88536.1	7.3	61.594	phosphoethanolamine transferase EptA	EptA	transferase		3	3	21.3493	10	10	3	0	1	1		1								20.823	19.664		17.879													19.7445	21.029	21.1693	21.3493	19.8063	20.3352
gi|1790040690|gb|QHB86403.1|	gi|1790040690|gb|QHB86403.1|	Escherichia coli BL21-AI	QHB86403.1	43	32.458	phosphotransferase		transferase		8	8	23.3292	15	15	3	2	1	1		1			1	1				22.3424	22.3535		20.329			17.127	16.3305									20.6957	22.1009	23.2437	23.3292	21.5016	23.1325
gi|1790039290|gb|QHB85003.1|	gi|1790039290|gb|QHB85003.1|	Escherichia coli BL21-AI	QHB85003.1	8.7	32.321	polyamine aminopropyltransferase		transferase		2	2	19.5824	7	7	2	0	1	1										19.3009	18.841															19.3419		19.2175	19.3433	17.6931	19.4582
gi|1790041914|gb|QHB87627.1|	gi|1790041914|gb|QHB87627.1|	Escherichia coli BL21-AI	QHB87627.1	16.9	77.1	polyribonucleotide nucleotidyltransferase		transferase		10	10	21.055	14	8	2	0	1	1								17.9553	18.11	20.1562	19.0908							17.6552		17.6382	18.5726	18.5049	19.1087	16.7163		20.1375	19.153	20.2792	21.055	19.8663	18.9399
gi|1790039284|gb|QHB84997.1|	gi|1790039284|gb|QHB84997.1|	Escherichia coli BL21-AI	QHB84997.1	61.9	66.095	pyruvate dehydrogenase complex dihydrolipoyllysine-residue acetyltransferase		transferase		40	40	26.4059	16	8	2	0	1	1								24.558	24.5194	25.8402	25.2674							24.5247	24.5744	24.1776	24.9552	25.0591	24.5997	24.0918	24.327	25.298	25.5961	26.061	26.4059	25.0669	25.3649
gi|1790040339|gb|QHB86052.1|	gi|1790040339|gb|QHB86052.1|	Escherichia coli BL21-AI	QHB86052.1	33.7	11.475	thiosulfate sulfurtransferase PspE		transferase		2	2	23.5896	16	8	2	0	1	1								21.2439	20.9619	22.5498	22.3359							21.0716	21.7721	21.2088	20.9232	20.1786	22.1239	20.3485	21.1965	21.3942	22.2557	23.5896	22.9597	21.5368	22.8972
gi|1790041819|gb|QHB87532.1|	gi|1790041819|gb|QHB87532.1|	Escherichia coli BL21-AI	QHB87532.1	7.4	36.008	tRNA (adenosine(37)-N6)-threonylcarbamoyltransferase complex transferase subunit TsaD	TsaD	transferase		2	2	18.1481	6	6	2	0	1	1										17.0365	17.4885															15.976		17.8786	17.255	16.1699	18.1481
gi|1790041347|gb|QHB87060.1|	gi|1790041347|gb|QHB87060.1|	Escherichia coli BL21-AI	QHB87060.1	22.8	27.048	tRNA (cytosine(32)/uridine(32)-2-O)-methyltransferase TrmJ	TrmJ	transferase		4	4	21.9878	15	15	3	2	1	1		1	1	1						20.0596	19.9148		18.6459	15.737	16.2944											17.4477	19.7365	21.0666	21.9878	18.5143	20.8868
gi|1790039345|gb|QHB85058.1|	gi|1790039345|gb|QHB85058.1|	Escherichia coli BL21-AI	QHB85058.1	10	35.98	UDP-3-O-(3-hydroxymyristoyl)glucosamine N-acyltransferase		transferase		2	2	18.3027	2	2	1	0		1											18.2569																				18.3027
gi|1790041109|gb|QHB86822.1|	gi|1790041109|gb|QHB86822.1|	Escherichia coli BL21-AI	QHB86822.1	31.4	41.649	UDP-4-amino-4-deoxy-L-arabinose aminotransferase		transferase		10	10	22.5314	11	11	3	0	1	1		1								20.6716	20.7748		18.6851													19.1218	18.5523	22.481	22.5314	19.2678	20.9982
gi|1790041937|gb|QHB87650.1|	gi|1790041937|gb|QHB87650.1|	Escherichia coli BL21-AI	QHB87650.1	19.3	44.817	UDP-N-acetylglucosamine 1-carboxyvinyltransferase		transferase		7	7	21.6024	10	10	3	0	1	1		1								20.2054	20.1681		18.0193													19.7377	19.4439	21.5307	20.1094	17.5983	21.1995
gi|1790041312|gb|QHB87025.1|	gi|1790041312|gb|QHB87025.1|	Escherichia coli BL21-AI	QHB87025.1	51.9	22.533	uracil phosphoribosyltransferase		transferase		8	8	23.6741	11	11	3	0	1	1		1								22.6947	22.1206		19.7457													22.6591	22.5349	22.2248	23.36	20.0307	23.2162
gi|1790042100|gb|QHB87813.1|	gi|1790042100|gb|QHB87813.1|	Escherichia coli BL21-AI	QHB87813.1	2.4	49.951	uroporphyrinogen-III C-methyltransferase		transferase		1	1	17.3649	6	6	2	0	1	1										16.5898	15.4865															15.81	16.2401	16.9441	17.3649	15.1922
gi|1790040269|gb|QHB85982.1|	gi|1790040269|gb|QHB85982.1|	Escherichia coli BL21-AI	QHB85982.1	8.6	32.942	UTP--glucose-1-phosphate uridylyltransferase GalU	GalU	transferase		2	2	20.1549	10	10	3	0	1	1		1								19.6515	19.1828		17.9698														18.7159	20.1549	20.0837	18.2037	19.7934
gi|1790041111|gb|QHB86824.1|	gi|1790041111|gb|QHB86824.1|	Escherichia coli BL21-AI	QHB86824.1	43.8	74.288	bifunctional UDP-4-amino-4-deoxy-L-arabinose formyltransferase/UDP-glucuronic acid oxidase ArnA	ArnA	transferase, cytochrome/oxidase activity; NAD-related pathways		24	24	23.6122	17	14	3	1	1	1		1			1		2.1.2.13;1.1.1.305	16.3159	16.6495	21.9521	21.3322		19.2111			17.5845				15.3418	17.2899				16.6495	19.9343	21.2924	23.6122	22.9696	17.5366	23.1788
gi|1790041110|gb|QHB86823.1|	gi|1790041110|gb|QHB86823.1|	Escherichia coli BL21-AI	QHB86823.1	17.1	36.339	undecaprenyl-phosphate 4-deoxy-4-formamido-L-arabinose transferase	ArnC	transferase; GSU80_10860 (ArnC) | GT2	GSU80_10860 (ArnC) | GT2	5	5	21.6591	7	7	2	0	1	1							2.4.2.53			20.4379	19.481															20.4224	20.0231	19.6471	21.6591	19.3529	20.1599
gi|1790042147|gb|QHB87860.1|	gi|1790042147|gb|QHB87860.1|	Escherichia coli BL21-AI	QHB87860.1	21.6	78.526	4-alpha-glucanotransferase; amylomaltase or 4-α-glucanotransferase	MalQ	transferase; GSU80_16460 (MalQ) | GH77	GSU80_16460 (MalQ) | GH77	9	9	18.0731	7	7	2	1	1	1					1		2.4.1.25;2.4.1.225; 2.4.2.53			17.3264	16.8308					13.7066										16.2861		18.0731	17.6201		16.9496
gi|1790042148|gb|QHB87861.1|	gi|1790042148|gb|QHB87861.1|	Escherichia coli BL21-AI	QHB87861.1	60.9	90.521	maltodextrin phosphorylase	MalP	transferase; GSU80_16465 (MalP) | GT35	GSU80_16465 (MalP) | GT35	46	46	25.1274	20	12	3	0	1	1		1					2.4.1.1	19.7544	18.2245	24.2289	24.0864		22.9781					19.6326	19.1342	20.0605	20.1901	18.0915	18.0455	17.9906	18.7702	23.8069	23.47	24.5112	25.1274	23.6755	24.4809
gi|1790042159|gb|QHB87872.1|	gi|1790042159|gb|QHB87872.1|	Escherichia coli BL21-AI	QHB87872.1	17.5	93.171	glycogen phosphorylase		transferase; GSU80_16525 | GT35	GSU80_16525 | GT35	9	9	22.098	12	11	3	0	1	1		1					2.4.1.1		19.9603	18.4181	17.654		17.6297										19.9603				16.5383	19.6501	19.0659	16.75	19.5408
gi|1790042160|gb|QHB87873.1|	gi|1790042160|gb|QHB87873.1|	Escherichia coli BL21-AI	QHB87873.1	2.1	52.822	glycogen synthase GlgA; UDP-Glc: glycogen glucosyltransferase	GlgA	transferase; GSU80_16530 (GlgA) | GT5	GSU80_16530 (GlgA) | GT5	1	1	18.9313	9	9	3	0	1	1		1					2.4.1.11			18.2435	17.5369		16.6214													17.134		18.6651	18.9313	17.2526	17.7949
gi|1790039942|gb|QHB85655.1|	gi|1790039942|gb|QHB85655.1|	Escherichia coli BL21-AI	QHB85655.1	8.3	27.022	arginine ABC transporter ATP-binding protein ArtP	ArtP	transporters		1	1	18.1857	4	4	0	2							1	1										17.9321	17.8017
gi|1790042257|gb|QHB87970.1|	gi|1790042257|gb|QHB87970.1|	Escherichia coli BL21-AI	QHB87970.1	17.8	45.47	C4-dicarboxylate transporter DctA	DctA	transporters		8	8	25.4766	21	17	4	1	1	1	1	1				1		16.6063	18.1901	24.3381	23.9144	18.2049	23.3468				17.8092	16.7529	16.6669	16.3992			18.1901			23.2137	25.4766	23.9247	24.7375	23.46	24.5724
gi|1790039738|gb|QHB85451.1|	gi|1790039738|gb|QHB85451.1|	Escherichia coli BL21-AI	QHB85451.1	9.6	33.298	CNNM family magnesium/cobalt transport protein CorC	CorC	transporters		3	3	19.6211	5	5	2	0	1	1										18.5898	18.332																	18.7691	18.4104		19.6211
gi|1790039963|gb|QHB85676.1|	gi|1790039963|gb|QHB85676.1|	Escherichia coli BL21-AI	QHB85676.1	5.1	65.081	cysteine/glutathione ABC transporter permease/ATP-binding protein CydD	CydD	transporters		3	3	19.7674	10	10	3	0	1	1		1								18.6141	18.5473		16.0316													17.2576	19.6925	18.3525	19.1538	18.1236	19.7674
gi|1790042916|gb|QHB88629.1|	gi|1790042916|gb|QHB88629.1|	Escherichia coli BL21-AI	QHB88629.1	3.2	51.659	D-serine/D-alanine/glycine transporter		transporters		1	1	19.2446	3	3	1	0	1											18.6044																	18.0982	19.2446	18.4702
gi|1790042273|gb|QHB87986.1|	gi|1790042273|gb|QHB87986.1|	Escherichia coli BL21-AI	QHB87986.1	9.8	35.844	dipeptide ABC transporter ATP-binding protein		transporters		2	2	18.2424	5	2	1	0		1								17.0364	17.5146		18.0549							17.0364						17.9791	17.0502
gi|1790042930|gb|QHB88643.1|	gi|1790042930|gb|QHB88643.1|	Escherichia coli BL21-AI	QHB88643.1	24.2	34.312	galactofuranose ABC transporter substrate-binding protein YtfQ	YtfQ	transporters		5	5	21.234	11	4	1	0	1									19.6908	18.2808	20.5544									19.6261	18.6974	20.7488	18.4327	19.7552	17.7334	17.2021	20.7588	19.4206	21.234	20.8043
gi|1790041014|gb|QHB86727.1|	gi|1790041014|gb|QHB86727.1|	Escherichia coli BL21-AI	QHB86727.1	3.9	35.55	galactose/methyl galactoside ABC transporter permease MglC	MglC	transporters		1	1	20.9346	3	2	1	0	1										19.4942	19.4358													19.4942			17.937			20.9346
gi|1790041096|gb|QHB86809.1|	gi|1790041096|gb|QHB86809.1|	Escherichia coli BL21-AI	QHB86809.1	6.9	50.309	glycerol-3-phosphate transporter		transporters		3	3	20.1196	12	11	3	0	1	1		1							16.4901	19.0179	18.7695		17.0923										16.4901			17.7209	20.1196	19.0717	19.1596	18.0312	19.1397
gi|1790041451|gb|QHB87164.1|	gi|1790041451|gb|QHB87164.1|	Escherichia coli BL21-AI	QHB87164.1	13.3	36.045	glycine betaine/L-proline ABC transporter substrate-binding protein ProX	ProX	transporters		3	3	21.7995	19	12	3	0		1	1	1						19.0127	19.4987		21.1615	20.7952	20.7454						19.9489	19.3061	17.783	20.8695	18.3381	20.5096	18.2774					21.5462	21.2477
gi|1790042218|gb|QHB87931.1|	gi|1790042218|gb|QHB87931.1|	Escherichia coli BL21-AI	QHB87931.1	8.5	38.828	HlyD family efflux transporter periplasmic adaptor subunit		transporters		2	2	20.3392	6	6	2	0	1	1										18.3712	19.7178																14.7226	20.0517	20.3392	19.0081	19.8677
gi|1790040857|gb|QHB86570.1|	gi|1790040857|gb|QHB86570.1|	Escherichia coli BL21-AI	QHB86570.1	17.9	55.018	L-arabinose ABC transporter ATP-binding protein AraG	AraG	transporters		8	8	20.9032	7	7	2	0	1	1										19.6676	18.6362															18.2188		19.8809	20.9032	16.8267	19.5805
gi|1790043172|gb|QHB88885.1|	gi|1790043172|gb|QHB88885.1|	Escherichia coli BL21-AI	QHB88885.1	9.1	34.211	L-arabinose ABC transporter permease AraH	AraH	transporters		3	3	21.7856	17	12	3	0	1	1		1						17.4735	18.3958	20.7165	19.907		18.4159					18.0857		16.8956	17.4391		18.7368		18.0548	20.32	20.0446	20.7157	21.7856	20.6083	20.0175
gi|1790040178|gb|QHB85891.1|	gi|1790040178|gb|QHB85891.1|	Escherichia coli BL21-AI	QHB85891.1	6	25.452	lipoprotein-releasing ABC transporter ATP-binding protein LolD	LolD	transporters		1	1	18.4645	2	2	1	0		1											18.4148																				18.3651
gi|1790041948|gb|QHB87661.1|	gi|1790041948|gb|QHB87661.1|	Escherichia coli BL21-AI	QHB87661.1	11.2	26.8	LPS export ABC transporter ATP-binding protein		transporters		2	2	20.8478	10	9	3	0	1	1		1						14.0285		18.759	17.6343		17.3404					14.0285								16.6702			20.8478	16.5783	17.2004
gi|1790042749|gb|QHB88462.1|	gi|1790042749|gb|QHB88462.1|	Escherichia coli BL21-AI	QHB88462.1	24.3	40.99	maltose/maltodextrin ABC transporter ATP-binding protein MalK	MalK	transporters		7	7	22.5731	12	12	3	0	1	1		1								20.9185	21.4785		19.8363													20.3673	18.4612	22.5731	22.2723	20.459	21.9159
gi|1790042748|gb|QHB88461.1|	gi|1790042748|gb|QHB88461.1|	Escherichia coli BL21-AI	QHB88461.1	59.8	43.387	maltose/maltodextrin ABC transporter substrate-binding protein MalE	MalE	transporters		21	21	24.9904	20	12	3	0	1	1		1						21.984	21.4798	24.6005	24.0298		23.2875					21.2824	21.4366	21.9808	23.2363	22.4641	21.5338	20.5623	21.3591	24.3401	24.3079	24.7634	24.9904	23.8014	24.0537
gi|1790040780|gb|QHB86493.1|	gi|1790040780|gb|QHB86493.1|	Escherichia coli BL21-AI	QHB86493.1	7.1	27.635	mannose/fructose/sorbose family PTS transporter subunit IIC		transporters		1	1	23.5544	12	4	1	0	1									21.6557	21.8173	23.1179								21.6645	22.1231	22.0721	20.763	21.2556	22.8073	21.9822	21.2241	22.1213	23.3675	23.4285	23.5544
gi|1790040796|gb|QHB86509.1|	gi|1790040796|gb|QHB86509.1|	Escherichia coli BL21-AI	QHB86509.1	2.8	48.289	membrane integrity lipid transport subunit YebS	YebS	transporters		1	1	24.3739	22	14	4	0	1	1	1	1						21.016	21.4675	22.0286	21.8317	22.9841	23.4124					21.156	21.4168	20.0259	21.4653	21.2332	22.8649	20.599	21.1731	21.8027	23.0512	22.6125	20.6481	22.7733	20.9398
gi|1790041700|gb|QHB87413.1|	gi|1790041700|gb|QHB87413.1|	Escherichia coli BL21-AI	QHB87413.1	2.4	46.389	MFS transporter		transporters		1	1	21.6545	13	12	3	0	1	1		1							17.8066	20.7147	20.7387		21.5263										17.8066			19.1867	21.4112	20.9393	21.3219	20.0348	21.2161
gi|1790040638|gb|QHB86351.1|	gi|1790040638|gb|QHB86351.1|	Escherichia coli BL21-AI	QHB86351.1	5	49.461	multidrug efflux MATE transporter MdtK	MdtK	transporters		2	2	21.2489	4	4	2	0		1		1									20.5548		19.4666																		21.2489
gi|1790039568|gb|QHB85281.1|	gi|1790039568|gb|QHB85281.1|	Escherichia coli BL21-AI	QHB85281.1	22.2	42.196	multidrug efflux RND transporter periplasmic adaptor subunit AcrA	AcrA	transporters		7	7	20.607	10	8	2	0	1	1								18.0027	18.011	19.7997	19.7495							18.0027					18.011			19.1514	19.1281	20.3125	20.607	19.0632	20.2025
gi|1790039567|gb|QHB85280.1|	gi|1790039567|gb|QHB85280.1|	Escherichia coli BL21-AI	QHB85280.1	11.6	113.57	multidrug efflux RND transporter permease subunit		transporters		9	9	19.9197	12	12	3	0	1	1		1								19.2212	19.1709		18.2104													18.3298	19.5331	19.2582	19.7635	19.4949	19.9197
gi|1790040274|gb|QHB85987.1|	gi|1790040274|gb|QHB85987.1|	Escherichia coli BL21-AI	QHB85987.1	9.2	60.975	oligopeptide ABC transporter substrate-binding protein OppA	OppA	transporters		3	3	20.0029	10	4	1	0	1									17.593	16.9941	18.9097								17.2774	16.9669		18.5346	17.2494	17.0033	16.7296		19.0103	18.5381	18.0876	20.0029
gi|1790040965|gb|QHB86678.1|	gi|1790040965|gb|QHB86678.1|	Escherichia coli BL21-AI	QHB86678.1	66.7	17.006	PTS galactitol transporter subunit IIA		transporters		7	7	26.5	30	24	3	4	1	1		1	1	1	1	1		20.3922	19.7476	25.8552	24.7721		23.4529	22.352	21.3654	22.0383	22.2338		19.7281	20.4339	21.0146	19.5897		19.4125	20.2405	25.1208	25.3998	26.5	26.4	24.6519	24.8758
gi|1790040964|gb|QHB86677.1|	gi|1790040964|gb|QHB86677.1|	Escherichia coli BL21-AI	QHB86677.1	34	10.27	PTS galactitol transporter subunit IIB		transporters		2	2	25.8282	20	14	4	0	1	1	1	1						20.5757	20.7086	24.4799	24.0854	21.3912	24.0274					21.491	19.4761		20.7601		21.9989	19.8095	20.3175	22.3557	24.0052	25.8282	25.7307	21.7198	24.4073
gi|1790041241|gb|QHB86954.1|	gi|1790041241|gb|QHB86954.1|	Escherichia coli BL21-AI	QHB86954.1	27.2	18.251	PTS glucose transporter subunit IIA		transporters		4	4	22.5686	20	12	3	0	1	1		1						20.7175	19.8655	22.1306	22.02		21.4382					21.7293	20.7814	19.9908	20.3684	20.3551	19.4414	20.4753	19.1904	21.743	21.723	22.5686	22.4878	22.4521	22.2057
gi|1790040163|gb|QHB85876.1|	gi|1790040163|gb|QHB85876.1|	Escherichia coli BL21-AI	QHB85876.1	15.7	50.676	PTS glucose transporter subunit IIBC		transporters		9	9	23.4774	12	12	3	1	1	1		1				1				21.2696	17.5477		17.0246				14.8724									19.2181	23.4774	20.072	22.3107	17.1668	17.9285
gi|1790042333|gb|QHB88046.1|	gi|1790042333|gb|QHB88046.1|	Escherichia coli BL21-AI	QHB88046.1	29.5	67.971	PTS mannitol transporter subunit IICBA		transporters		13	13	23.9358	20	18	3	2	1	1		1		1	1			16.1608		22.5025	21.5928		19.8605		16.1674	16.8379		16.7469	15.5746							21.6516	23.9358	21.5608	22.8618	21.8732	22.0958
gi|1790040779|gb|QHB86492.1|	gi|1790040779|gb|QHB86492.1|	Escherichia coli BL21-AI	QHB86492.1	29.4	35.047	PTS mannose transporter subunit IIAB		transporters		8	8	22.5369	19	12	3	0	1	1		1						17.6679	16.2759	21.5548	21.016		20.153					17.7606	16.3405		18.9026	16.4954	16.9761	15.5636	16.0683	21.5241	20.5319	22.5369	21.6261	20.8795	21.6277
gi|1790040781|gb|QHB86494.1|	gi|1790040781|gb|QHB86494.1|	Escherichia coli BL21-AI	QHB86494.1	29	30.955	PTS mannose transporter subunit IID		transporters		10	10	24.3946	20	12	3	0	1	1		1						17.8527	18.2548	23.5227	21.9719		20.3094					18.4263	17.0916	16.9021	18.991	18.105	17.7426	17.8471	19.3245	22.6688	24.3946	23.1813	23.8459	20.9042	22.7162
gi|1790039748|gb|QHB85461.1|	gi|1790039748|gb|QHB85461.1|	Escherichia coli BL21-AI	QHB85461.1	5.1	68.316	PTS N-acetyl glucosamine transporter subunit IIABC		transporters		2	2	20.4235	3	3	1	0	1											18.7813																16.7791	20.4235		19.1415
gi|1790042942|gb|QHB88655.1|	gi|1790042942|gb|QHB88655.1|	Escherichia coli BL21-AI	QHB88655.1	2.3	51.129	PTS trehalose transporter subunit IIBC		transporters		1	1	18.5166	2	2	1	0		1											18.4245																			18.3324	18.5166
gi|1790040185|gb|QHB85898.1|	gi|1790040185|gb|QHB85898.1|	Escherichia coli BL21-AI	QHB85898.1	5.6	43.042	spermidine/putrescine ABC transporter ATP-binding protein PotA	PotA	transporters		2	2	16.1083	2	2	1	0		1											15.7308																				16.1083
gi|1790041680|gb|QHB87393.1|	gi|1790041680|gb|QHB87393.1|	Escherichia coli BL21-AI	QHB87393.1	6.7	50.982	sugar porter family MFS transporter		transporters		3	3	23.6159	6	5	2	0	1			1						18.4294		20.7685			20.1136					18.4294								18.7455	23.6159		19.9442
gi|1790041403|gb|QHB87116.1|	gi|1790041403|gb|QHB87116.1|	Escherichia coli BL21-AI	QHB87116.1	75.1	95.584	ATP-dependent chaperone ClpB	ClpB	transporters		63	63	25.4637	35	27	4	3	1	1	1	1		1	1	1		17.1867	16.9693	24.604	24.562	18.8916	23.1096		16.6222	19.5786	18.1498	15.6327	15.1586	17.3475	20.6078	19.5327	16.8668	14.2221	17.2555	23.9969	24.0536	24.9018	25.4637	24.2736	25.1565
gi|1790039542|gb|QHB85255.1|	gi|1790039542|gb|QHB85255.1|	Escherichia coli BL21-AI	QHB85255.1	24.2	23.186	ATP-dependent Clp endopeptidase proteolytic subunit ClpP	ClpP	transporters		4	4	24.8152	14	8	2	0	1	1								21.3769	21.7853	24.295	23.2995							20.3877	20.5456	21.4974	23.0768	22.3798		21.1908		23.2268	24.4817	24.8152	24.6562	23.5293	23.6736
gi|1790039959|gb|QHB85672.1|	gi|1790039959|gb|QHB85672.1|	Escherichia coli BL21-AI	QHB85672.1	15.8	84.21	ATP-dependent Clp protease ATP-binding subunit ClpA	ClpA	transporters		10	10	20.6983	12	12	3	0	1	1		1								19.832	20.069		18.6694													19.2526	19.3868	19.9902	20.6983	20.0098	20.3875
gi|1790039543|gb|QHB85256.1|	gi|1790039543|gb|QHB85256.1|	Escherichia coli BL21-AI	QHB85256.1	14.9	46.355	ATP-dependent protease ATP-binding subunit ClpX	ClpX	transporters		5	5	20.2681	8	8	3	0	1	1		1								18.8549	19.4109		17.9823													17.9762		18.3203	20.2681		20.206
gi|1790039523|gb|QHB85236.1|	gi|1790039523|gb|QHB85236.1|	Escherichia coli BL21-AI	QHB85236.1	6	32.159	(2E,6E)-farnesyl diphosphate synthase				2	2	18.7067	3	3	1	0		1											17.0555																			15.5913	18.7067
gi|1790039426|gb|QHB85139.1|	gi|1790039426|gb|QHB85139.1|	Escherichia coli BL21-AI	QHB85139.1	5.4	26.004	(Fe-S)-binding protein				1	1	18.566	5	5	2	0	1	1										17.6957	17.4804															17.0736		17.4476	18.566	16.9676
gi|1790041119|gb|QHB86832.1|	gi|1790041119|gb|QHB86832.1|	Escherichia coli BL21-AI	QHB86832.1	22.8	31.633	1,4-dihydroxy-2-naphthoyl-CoA synthase				5	5	22.3817	6	6	2	0	1	1										21.3799	20.4259															20.0734		21.6844	22.3817		18.8716
gi|1790041875|gb|QHB87588.1|	gi|1790041875|gb|QHB87588.1|	Escherichia coli BL21-AI	QHB87588.1	64.2	30.659	2-hydroxy-3-oxopropionate reductase				12	12	24.8648	20	12	3	0	1	1		1						21.3731	20.014	23.8067	23.4767		22.0109					21.802	21.0847	21.3996	21.2061	21.583	20.5016	19.1857	18.7857	23.2166	22.9874	24.1581	24.8648	23.751	23.9123
gi|1790042945|gb|QHB88658.1|	gi|1790042945|gb|QHB88658.1|	Escherichia coli BL21-AI	QHB88658.1	46.1	13.611	2-iminobutanoate/2-iminopropanoate deaminase				3	3	24.1672	16	8	2	0	1	1								22.459	22.8427	23.7649	23.4295							22.2383	22.2035	23.1283	22.2661	23.2843	22.6992	22.2519	23.1353	23.2022	23.7097	23.9807	24.1672	23.1173	23.7119
gi|1790039791|gb|QHB85504.1|	gi|1790039791|gb|QHB85504.1|	Escherichia coli BL21-AI	QHB85504.1	63.2	105.06	2-oxoglutarate dehydrogenase E1 component				48	48	24.3817	24	16	4	0	1	1	1	1						19.282	20.845	22.9085	23.3368	21.9933	22.8818					21.6211	16.9154	17.7748	20.8166	22.6462	16.7991	22.1907	21.7441	22.6977	22.0041	23.5608	23.3715	22.1875	23.2575
gi|1790042348|gb|QHB88061.1|	gi|1790042348|gb|QHB88061.1|	Escherichia coli BL21-AI	QHB88061.1	5.3	56.109	2,3-bisphosphoglycerate-independent phosphoglycerate mutase				3	3	19.3341	11	11	3	0	1	1		1								18.2146	18.858		17.9309													18.8871		17.4022	18.3544	18.9714	18.254
gi|1790039814|gb|QHB85527.1|	gi|1790039814|gb|QHB85527.1|	Escherichia coli BL21-AI	QHB85527.1	28.4	28.556	2,3-diphosphoglycerate-dependent phosphoglycerate mutase				7	7	23.2196	12	8	2	0	1	1								20.6679	20.6631	22.4696	21.4555								20.7148	19.3486	21.9403	20.6631				21.8944	22.3456	22.4185	23.2196	21.1744	21.4508
gi|1790043082|gb|QHB88795.1|	gi|1790043082|gb|QHB88795.1|	Escherichia coli BL21-AI	QHB88795.1	22.3	24.065	2,3-diphosphoglycerate-dependent phosphoglycerate mutase GpmB	GpmB			5	5	18.8445	11	10	3	0	1	1		1						15.0426		17.2452	17.7654		16.1647								15.0426					15.5133	17.0325	17.5905	18.8445	16.7454	17.702
gi|1790041770|gb|QHB87483.1|	gi|1790041770|gb|QHB87483.1|	Escherichia coli BL21-AI	QHB87483.1	18.9	31.109	2,5-didehydrogluconate reductase DkgA	DkgA			4	4	21.0166	19	12	3	0	1	1		1						17.2549	17.8454	20.4095	19.9027		18.3214					18.1281	16.0957	16.7029	18.0929	18.2956		17.5122	17.7284	19.7598	20.1572	20.7044	21.0166	19.6062	19.7573
gi|1790042120|gb|QHB87833.1|	gi|1790042120|gb|QHB87833.1|	Escherichia coli BL21-AI	QHB87833.1	13.3	38.863	3-dehydroquinate synthase				4	4	19.415	8	8	3	0	1	1		1								18.1424	19.228		16.9804													18.1252	15.8267	19.415	19.2026		19.2553
gi|1790039813|gb|QHB85526.1|	gi|1790039813|gb|QHB85526.1|	Escherichia coli BL21-AI	QHB85526.1	41.4	38.009	3-deoxy-7-phosphoheptulonate synthase AroG	AroG			12	11	21.7324	8	7	2	0	1	1								18.2836		20.735	19.6066									18.2836						20.6051	19.2761	21.7324	21.3261		20.0738
gi|1790040253|gb|QHB85966.1|	gi|1790040253|gb|QHB85966.1|	Escherichia coli BL21-AI	QHB85966.1	58.1	30.832	3-deoxy-8-phosphooctulonate synthase				17	17	24.8099	20	12	3	0	1	1		1						18.788	18.4366	24.2743	23.71		21.7154					18.0262	19.6686	17.8862	19.5711	19.1193	17.9546	18.163	18.5097	24.13	23.6717	24.4855	24.8099	23.1094	23.8493
gi|1790041945|gb|QHB87658.1|	gi|1790041945|gb|QHB87658.1|	Escherichia coli BL21-AI	QHB87658.1	25.5	20.015	3-deoxy-manno-octulosonate-8-phosphatase KdsC	KdsC			3	3	20.7206	3	2	1	0	1										20.3394	20.5052													20.3394				20.2897		20.7206
gi|1790039346|gb|QHB85059.1|	gi|1790039346|gb|QHB85059.1|	Escherichia coli BL21-AI	QHB85059.1	31.1	17.033	3-hydroxyacyl-ACP dehydratase FabZ	FabZ			3	3	24.1033	18	18	4	2	1	1	1	1			1	1				22.6368	22.3996	21.525	21.2642			16.9616	17.3664									22.7047	21.7167	22.0226	24.1033	22.6139	22.6652
gi|1790040155|gb|QHB85868.1|	gi|1790040155|gb|QHB85868.1|	Escherichia coli BL21-AI	QHB85868.1	50	25.507	3-oxoacyl-ACP reductase FabG	FabG			10	10	24.4746	20	12	3	0	1	1		1						18.5479	19.1041	23.1212	23.5126		22.3619					17.8886	19.1304	19.0632	18.1092	19.2246	18.7436	19.3087	19.1397	22.5327	22.6188	22.8587	24.4746	22.4476	24.0584
gi|1790039983|gb|QHB85696.1|	gi|1790039983|gb|QHB85696.1|	Escherichia coli BL21-AI	QHB85696.1	20.4	39.84	3-phosphoserine/phosphohydroxythreonine transaminase				7	7	21.8893	10	10	3	0	1	1		1								21.6979	21.4807		19.3213													21.7854		21.4191	21.8893	21.3307	21.624
gi|1790042921|gb|QHB88634.1|	gi|1790042921|gb|QHB88634.1|	Escherichia coli BL21-AI	QHB88634.1	23.6	27.204	3(2),5-bisphosphate nucleotidase CysQ	CysQ			4	4	21.2009	5	3	1	0	1									18.6908	18.5995	20.4463								18.6908					18.5995			21.2009		20.4993	19.6386
gi|1790039987|gb|QHB85700.1|	gi|1790039987|gb|QHB85700.1|	Escherichia coli BL21-AI	QHB85700.1	74.9	61.157	30S ribosomal protein S1				51	51	26.5539	20	12	3	0	1	1		1						22.5084	21.7007	25.7582	25.5356		24.3113					22.5552	21.899	22.6021	22.9776	22.2639	22.024	21.3146	21.2004	25.2968	25.2291	25.9532	26.5539	24.6426	26.1462
gi|1790042053|gb|QHB87766.1|	gi|1790042053|gb|QHB87766.1|	Escherichia coli BL21-AI	QHB87766.1	66	11.735	30S ribosomal protein S10				10	10	26.7398	20	12	3	0	1	1		1						23.8635	23.7522	25.9268	25.6251		25.0655					23.647	24.0031	23.7017	24.1022	24.4114	23.6349	23.41	23.5523	24.5801	25.8351	26.5522	26.7398	24.8077	25.8204
gi|1790042029|gb|QHB87742.1|	gi|1790042029|gb|QHB87742.1|	Escherichia coli BL21-AI	QHB87742.1	52.7	13.845	30S ribosomal protein S11				7	7	26.6798	19	12	3	0	1	1		1						22.4761	22.3044	25.5899	25.9418		24.4728					22.0031		22.7717	22.6536	22.7374	20.9419	22.5178	23.0206	24.2502	25.033	26.3966	26.6798	24.7067	26.5761
gi|1790042074|gb|QHB87787.1|	gi|1790042074|gb|QHB87787.1|	Escherichia coli BL21-AI	QHB87787.1	40.3	13.737	30S ribosomal protein S12				5	5	26.0465	19	12	3	0	1	1		1						20.4157	20.3996	24.6875	24.7092		23.3444					19.9882	20.8959	19.6812	21.0976	20.2736	21.0466	19.8787		23.3038	24.2835	25.1164	26.0465	23.1941	25.8649
gi|1790042030|gb|QHB87743.1|	gi|1790042030|gb|QHB87743.1|	Escherichia coli BL21-AI	QHB87743.1	69.5	13.099	30S ribosomal protein S13				15	15	28.0937	24	16	3	1	1	1		1		1				23.4546	23.928	26.5511	27.0872		24.9048		22.5059			24.3393	23.5417	22.9579	22.9798	23.7708	23.1711	24.6091	24.161	25.4195	26.276	27.3686	27.1402	25.0515	28.0937
gi|1790042039|gb|QHB87752.1|	gi|1790042039|gb|QHB87752.1|	Escherichia coli BL21-AI	QHB87752.1	51.5	11.58	30S ribosomal protein S14				5	5	26.7742	27	22	3	3	1	1		1		1	1	1		21.3963	21.3728	25.5432	25.2933		23.0101		21.3729	22.9838	23.619	21.5779		21.403	21.2079		21.3213	21.4242		23.4118	25.6479	26.7742	26.3389	24.2005	25.6994
gi|1790041915|gb|QHB87628.1|	gi|1790041915|gb|QHB87628.1|	Escherichia coli BL21-AI	QHB87628.1	60.7	10.269	30S ribosomal protein S15				5	5	24.6549	23	15	4	0	1	1	1	1						22.4596	22.7743	24.0038	23.0682	23.4418	23.0875					19.7327	23.4385	23.1827	23.4847	24.6549	23.3799	22.4136	20.649	22.7308	24.4839	24.1824	24.6182	22.6846	23.304
gi|1790041418|gb|QHB87131.1|	gi|1790041418|gb|QHB87131.1|	Escherichia coli BL21-AI	QHB87131.1	58.5	9.1904	30S ribosomal protein S16				4	4	25.4347	12	4	1	0	1									24.1917	23.81	24.7927								23.6903	24.4349	24.8688	23.7728	24.6652	23.9055	23.6136	23.0556	23.6528	25.4347	24.951	25.1321
gi|1790042043|gb|QHB87756.1|	gi|1790042043|gb|QHB87756.1|	Escherichia coli BL21-AI	QHB87756.1	39.3	9.7043	30S ribosomal protein S17				4	4	27.4839	19	12	3	0	1	1		1						22.9821	22.4358	26.4169	25.9149		25.3895					24.4904	21.6172	23.9018	21.9189	21.9511	23.9077		21.4484	24.5835	26.1232	27.4839	27.477	24.8022	27.2033
gi|1790042905|gb|QHB88618.1|	gi|1790042905|gb|QHB88618.1|	Escherichia coli BL21-AI	QHB88618.1	57.3	8.9863	30S ribosomal protein S18				6	6	28.3591	20	12	3	0	1	1		1						23.7531	22.9389	27.3124	26.2284		24.8321					24.0192	23.7446	23.8054	23.4432	22.9853	23.7935	22.7785	22.1984	25.8328	27.0571	28.3591	28.0007	25.1839	26.4937
gi|1790042048|gb|QHB87761.1|	gi|1790042048|gb|QHB87761.1|	Escherichia coli BL21-AI	QHB87761.1	48.9	10.43	30S ribosomal protein S19				5	5	24.5262	12	7	2	0	1	1								19.743	21.8092	21.8701	23.62										19.743	22.8959	20.3321	21.6141	22.3947	21.8959	20.1115	22.2663	23.2066		24.5262
gi|1790039336|gb|QHB85049.1|	gi|1790039336|gb|QHB85049.1|	Escherichia coli BL21-AI	QHB85049.1	76.3	26.743	30S ribosomal protein S2				20	20	26.58	20	12	3	0	1	1		1						20.1552	20.353	25.718	25.7244		24.7814					21.7099	18.1237	20.3782	20.4091	18.4098	20.4907	21.4218	21.0896	24.7591	25.3725	26.1604	26.58	24.9304	26.0225
gi|1790039203|gb|QHB84916.1|	gi|1790039203|gb|QHB84916.1|	Escherichia coli BL21-AI	QHB84916.1	43.7	9.6843	30S ribosomal protein S20				5	5	27.965	19	12	3	0	1	1		1						21.3181	20.7447	26.969	24.208		22.1823					21.6239	22.2154	20.723	20.7099	20.1262	20.4088	21.6992		24.6047	27.459	27.8473	27.965	22.0444	25.2699
gi|1790041820|gb|QHB87533.1|	gi|1790041820|gb|QHB87533.1|	Escherichia coli BL21-AI	QHB87533.1	46.5	8.4999	30S ribosomal protein S21				7	7	26.607	19	12	3	0	1	1		1						22.2027	21.9187	25.3318	24.327		22.9689						21.9355	22.5118	22.1608	21.3734	22.7853	23.0893	20.4269	23.1377	25.8531	25.7295	26.607	20.5678	25.9142
gi|1790042046|gb|QHB87759.1|	gi|1790042046|gb|QHB87759.1|	Escherichia coli BL21-AI	QHB87759.1	73	25.983	30S ribosomal protein S3				17	17	26.6393	20	12	3	0	1	1		1						24.1451	23.5357	25.9158	25.5949		25.0563					24.0988	24.0783	24.3324	24.0707	23.2664	24.2828	23.3389	23.2545	25.1708	25.8175	26.0357	26.6393	24.9254	26.0747
gi|1790042028|gb|QHB87741.1|	gi|1790042028|gb|QHB87741.1|	Escherichia coli BL21-AI	QHB87741.1	74.3	23.469	30S ribosomal protein S4				19	19	27.5413	20	12	3	0	1	1		1						21.9756	22.3428	26.8717	26.6451		25.4687					22.244	22.2129	21.0039	22.4418	21.6122	22.7163	22.2086	22.8343	26.0669	26.607	27.2716	27.5413	25.1761	27.2227
gi|1790042903|gb|QHB88616.1|	gi|1790042903|gb|QHB88616.1|	Escherichia coli BL21-AI	QHB88616.1	71.8	15.173	30S ribosomal protein S6				8	8	24.2371	15	8	2	0	1	1								22.4717	20.5338	23.5723	23.1938								22.3764	22.0648	22.9738	20.7469	20.9237	20.727	19.7378	22.8711	23.1223	24.0586	24.2371	22.7202	23.4227
gi|1790042073|gb|QHB87786.1|	gi|1790042073|gb|QHB87786.1|	Escherichia coli BL21-AI	QHB87786.1	73.7	17.604	30S ribosomal protein S7				17	17	28.6459	20	12	3	0	1	1		1						22.5491	23.6942	26.6758	27.8159		26.0479					22.0938	23.2339	22.3656	22.5032	24.8535	22.8547	24.1689	22.8996	26.1355	26.2473	26.8318	27.4887	25.9157	28.6459
gi|1790042038|gb|QHB87751.1|	gi|1790042038|gb|QHB87751.1|	Escherichia coli BL21-AI	QHB87751.1	67.7	14.126	30S ribosomal protein S8				7	7	28.5205	16	8	2	0	1	1								24.5037	23.7115	26.226	26.4986							24.4573	24.6995	24.1193	24.7386	23.9537	23.4413	23.9077	23.5434	24.7265	25.8798	27.7448	26.5529	28.5205	26.8636
gi|1790041971|gb|QHB87684.1|	gi|1790041971|gb|QHB87684.1|	Escherichia coli BL21-AI	QHB87684.1	70	14.856	30S ribosomal protein S9				14	14	27.5089	20	12	3	0	1	1		1						22.8002	22.5933	26.1762	26.6653		25.3036					24.2784	21.9017	22.22	22.8005	22.7243	22.8898	23.0004	21.7588	25.3239	25.9473	26.6542	26.7792	24.8357	27.5089
gi|1790039211|gb|QHB84924.1|	gi|1790039211|gb|QHB84924.1|	Escherichia coli BL21-AI	QHB84924.1	26.4	28.743	4-hydroxy-tetrahydrodipicolinate reductase				5	5	21.5146	15	12	4	0	1	1	1	1							18.2154	20.3495	19.9132	17.5046	18.7455									18.5266	18.0862	18.0334		19.3883		20.7091	20.9511	18.6371	20.9783
gi|1790041292|gb|QHB87005.1|	gi|1790041292|gb|QHB87005.1|	Escherichia coli BL21-AI	QHB87005.1	29.8	31.284	4-hydroxy-tetrahydrodipicolinate synthase				7	7	24.1343	16	12	4	0	1	1	1	1						17.0089	20.3316	20.9705	22.5931	20.162	19.5444								17.0089	19.2511		23.6707	18.0732	21.0628	20.4703	20.9776	21.3712	22.7678	23.2751
gi|1790041173|gb|QHB86886.1|	gi|1790041173|gb|QHB86886.1|	Escherichia coli BL21-AI	QHB86886.1	37.6	41.377	4-phosphoerythronate dehydrogenase PdxB	PdxB			11	11	21.3891	11	11	3	1	1	1		1			1					20.3673	19.5101		16.9578			15.0576										18.7374		20.9753	21.3891	18.4184	20.3775
gi|1790041144|gb|QHB86857.1|	gi|1790041144|gb|QHB86857.1|	Escherichia coli BL21-AI	QHB86857.1	4.5	22.694	5-deoxynucleotidase				1	1	18.1571	5	5	2	0	1	1										17.6452	17.4279															17.1342	17.6443	18.1571
gi|1790039327|gb|QHB85040.1|	gi|1790039327|gb|QHB85040.1|	Escherichia coli BL21-AI	QHB85040.1	27.6	24.354	5-methylthioadenosine/S-adenosylhomocysteine nucleosidase				4	4	22.694	22	22	3	4	1	1		1	1	1	1	1				21.3761	20.4804		18.8014	17.9275	17.1533	18.5312	17.9873									19.7069	21.2423	21.8614	22.694	18.9971	21.0483
gi|1790042703|gb|QHB88416.1|	gi|1790042703|gb|QHB88416.1|	Escherichia coli BL21-AI	QHB88416.1	75.6	24.729	50S ribosomal protein L1				16	16	27.5027	16	8	2	0	1	1								25.5352	25.3821	26.4689	27.0059							25.6309	25.5134	25.4327	25.5639	25.8435	25.2749	25.3888	25.0211	25.4774	26.3335	26.9745	27.0902	26.0803	27.5027
gi|1790042704|gb|QHB88417.1|	gi|1790042704|gb|QHB88417.1|	Escherichia coli BL21-AI	QHB88417.1	83.6	17.711	50S ribosomal protein L10				16	16	27.6755	20	12	3	0	1	1		1						23.8196	24.0379	27.2363	27.0053		25.2902					24.2393	23.9708	23.1347	23.9337	24.4017	24.5	23.4863	23.7637	26.7891	27.0107	27.47	27.6755	25.9994	27.3201
gi|1790041972|gb|QHB87685.1|	gi|1790041972|gb|QHB87685.1|	Escherichia coli BL21-AI	QHB87685.1	80.3	16.018	50S ribosomal protein L13				18	18	26.1175	20	12	3	0	1	1		1						22.4442	22.6109	25.1383	25.2913		23.9032					21.8256	22.93	21.9639	23.0574	23.3958	21.5067	23.5382	22.0028	23.9267	24.8193	26.1175	25.6896	23.2799	26.0931
gi|1790042042|gb|QHB87755.1|	gi|1790042042|gb|QHB87755.1|	Escherichia coli BL21-AI	QHB87755.1	61	13.541	50S ribosomal protein L14				9	9	26.8527	20	12	3	0	1	1		1						22.7075	22.2675	26.0041	25.6917		24.6657					22.9056	22.5823	22.5788	22.7631	22.3784	22.4578	23.0873	21.1466	24.7358	26.0153	26.4127	26.8527	24.6839	26.5111
gi|1790042033|gb|QHB87746.1|	gi|1790042033|gb|QHB87746.1|	Escherichia coli BL21-AI	QHB87746.1	64.6	14.966	50S ribosomal protein L15				12	12	26.2545	20	12	3	0	1	1		1						20.6912	21.4439	23.6728	24.9698		22.3066					21.0698	20.796	19.9621	20.9369	21.0231	21.0645	21.4828	22.2053	22.6022	23.8179	24.129	24.1423	22.3294	26.2545
gi|1790042045|gb|QHB87758.1|	gi|1790042045|gb|QHB87758.1|	Escherichia coli BL21-AI	QHB87758.1	32.4	15.281	50S ribosomal protein L16				3	3	26.1166	12	11	3	0	1	1		1							20.7642	22.2621	24.0226		21.1426												20.7642	22.6543	21.5853	22.295	22.5137	20.4462	26.1166
gi|1790042026|gb|QHB87739.1|	gi|1790042026|gb|QHB87739.1|	Escherichia coli BL21-AI	QHB87739.1	61.4	14.364	50S ribosomal protein L17				13	13	28.0016	20	12	3	0	1	1		1						22.0688	22.0887	26.4057	26.6667		23.6288					23.3009	22.232	20.1791	22.563	21.9767	23.1383	20.8761	22.3636	25.7316	25.5275	26.741	27.6228	23.6138	27.2767
gi|1790042036|gb|QHB87749.1|	gi|1790042036|gb|QHB87749.1|	Escherichia coli BL21-AI	QHB87749.1	72.6	12.769	50S ribosomal protein L18				13	13	27.7072	16	8	2	0	1	1								26.5367	26.7521	27.1875	27.2309							26.332	26.411	26.6345	26.7691	26.8599	26.7188	26.7758	26.6538	26.2617	27.4219	27.518	27.5483	26.411	27.7072
gi|1790041415|gb|QHB87128.1|	gi|1790041415|gb|QHB87128.1|	Escherichia coli BL21-AI	QHB87128.1	67	13.133	50S ribosomal protein L19				9	9	25.9853	20	12	3	0	1	1		1						22.0132	21.7335	25.0252	25.1144		24.0806					20.3803	21.7687	22.5956	23.3084	22.1578	21.927	20.4558	22.3935	23.7631	24.9419	25.4105	25.9853	24.1863	25.6678
gi|1790042049|gb|QHB87762.1|	gi|1790042049|gb|QHB87762.1|	Escherichia coli BL21-AI	QHB87762.1	69.6	29.86	50S ribosomal protein L2				25	25	27.078	20	12	3	0	1	1		1						23.0031	23.3328	26.3877	26.312		24.9455					23.004	22.971	22.9454	23.092	22.9146	23.7404	23.2456	23.4307	25.277	26.3258	26.8699	27.078	25.0921	27.0253
gi|1790040684|gb|QHB86397.1|	gi|1790040684|gb|QHB86397.1|	Escherichia coli BL21-AI	QHB86397.1	50	13.497	50S ribosomal protein L20				9	9	27.7189	24	16	3	1	1	1		1		1				21.6877	22.9637	26.6839	24.3716		24.0453		21.9104			23.2669	21.9892	18.36	23.1347	22.6789	22.4514	23.4176	23.307	25.1685	27.7189	26.7603	27.0879	23.7819	25.8952
gi|1790041934|gb|QHB87647.1|	gi|1790041934|gb|QHB87647.1|	Escherichia coli BL21-AI	QHB87647.1	49.5	11.564	50S ribosomal protein L21				7	7	25.974	20	12	3	0	1	1		1						24.3187	23.9376	25.5217	25.6057		24.9017					24.074	24.2617	24.2529	24.6863	24.5591	23.9278	24.2646	22.9989	24.618	25.5965	25.974	25.8983	25.0813	25.6946
gi|1790042047|gb|QHB87760.1|	gi|1790042047|gb|QHB87760.1|	Escherichia coli BL21-AI	QHB87760.1	63.6	12.226	50S ribosomal protein L22				12	12	26.8992	20	12	3	0	1	1		1						22.7751	23.9291	25.7676	25.98		24.7065					23.1737	23.3672	21.2214	23.3382	23.8282	24.5962	23.245	24.0471	24.5995	25.5358	26.2177	26.7176	24.277	26.8992
gi|1790042050|gb|QHB87763.1|	gi|1790042050|gb|QHB87763.1|	Escherichia coli BL21-AI	QHB87763.1	44	11.199	50S ribosomal protein L23				4	4	24.129	21	14	3	1	1	1		1				1		19.8812	19.3072	22.4585	22.6115		21.1302				20.7298	21.1131	19.9673	18.5631		19.7691	19.4935	19.7227	18.2437	22.4447	21.3475	23.3664	22.6754	21.1804	22.9654
gi|1790042041|gb|QHB87754.1|	gi|1790042041|gb|QHB87754.1|	Escherichia coli BL21-AI	QHB87754.1	76.9	11.316	50S ribosomal protein L24				8	8	23.5829	11	4	1	0	1									21.2854	20.1717	22.3912									23.5829	20.4355	19.8378	20.5096	19.7716	21.4999	18.9059	21.7415	22.4115	21.9716	23.4404
gi|1790041933|gb|QHB87646.1|	gi|1790041933|gb|QHB87646.1|	Escherichia coli BL21-AI	QHB87646.1	27.1	9.1244	50S ribosomal protein L27				4	4	24.3489	19	12	3	0	1	1		1						21.0062	21.2866	23.4984	23.0795		22.0116					21.2073	20.8654	21.0501	20.9018		21.034	21.5667	21.2592	22.7498	22.9378	23.957	24.3489	21.1774	24.0579
gi|1790042369|gb|QHB88082.1|	gi|1790042369|gb|QHB88082.1|	Escherichia coli BL21-AI	QHB88082.1	44.9	9.0064	50S ribosomal protein L28				5	5	25.5754	16	14	4	0	1	1	1	1							19.1373	23.1404	24.5747	16.7688	21.9686									17.41		20.8645		23.5104	22.6079	23.0763	23.3671	22.9029	25.5754
gi|1790042044|gb|QHB87757.1|	gi|1790042044|gb|QHB87757.1|	Escherichia coli BL21-AI	QHB87757.1	58.7	7.2734	50S ribosomal protein L29				3	3	23.4774	4	3	1	0	1									22.6797		23.3676											22.6797						23.3109	23.3144	23.4774
gi|1790042052|gb|QHB87765.1|	gi|1790042052|gb|QHB87765.1|	Escherichia coli BL21-AI	QHB87765.1	75.1	22.243	50S ribosomal protein L3				17	17	25.8019	20	12	3	0	1	1		1						22.8854	22.8779	24.9408	25.4353		24.306					21.5945	23.6169	23.4546	22.8754	22.8493	23.5403	22.8141	22.3077	24.2016	24.6728	25.3928	25.4958	24.814	25.8019
gi|1790042034|gb|QHB87747.1|	gi|1790042034|gb|QHB87747.1|	Escherichia coli BL21-AI	QHB87747.1	57.6	6.5417	50S ribosomal protein L30				4	4	24.6645	20	12	3	0	1	1		1						22.2052	21.867	23.9129	23.6655		23.0841					22.8495	20.9548	22.6477	22.3688	23.7355	19.5014	22.8348	21.3963	22.2906	24.5921	24.1045	24.6645	22.6003	24.3145
gi|1790042667|gb|QHB88380.1|	gi|1790042667|gb|QHB88380.1|	Escherichia coli BL21-AI	QHB88380.1	20	7.871	50S ribosomal protein L31				2	2	24.3736	20	12	3	0	1	1		1						21.4983	21.5799	23.5384	22.2458		22.2909					20.6709	21.7618	21.6071	21.9532	21.2646	21.5911	21.5966	21.8673	22.4892	23.5599	23.7311	24.3736	20.7153	22.3535
gi|1790042051|gb|QHB87764.1|	gi|1790042051|gb|QHB87764.1|	Escherichia coli BL21-AI	QHB87764.1	69.7	22.086	50S ribosomal protein L4				19	19	27.4773	20	12	3	0	1	1		1						20.8718	19.8391	25.3663	26.5229		24.4731					20.6104	19.569	20.7035	22.6041	20.9061	19.6791	21.3166	17.4545	24.5982	25.068	25.8866	25.9123	24.6624	27.4773
gi|1790042040|gb|QHB87753.1|	gi|1790042040|gb|QHB87753.1|	Escherichia coli BL21-AI	QHB87753.1	83.2	20.301	50S ribosomal protein L5				25	25	29.3406	24	16	4	0	1	1	1	1						23.0812	23.552	28.5575	28.1894	24.2941	26.7313					23.314	22.7541	22.8567	23.4	23.1402	24.1578	23.2313	23.679	27.4125	28.3973	29.0798	29.3406	26.9832	28.8517
gi|1790042037|gb|QHB87750.1|	gi|1790042037|gb|QHB87750.1|	Escherichia coli BL21-AI	QHB87750.1	68.9	18.904	50S ribosomal protein L6				19	19	27.2412	20	12	3	0	1	1		1						24.1868	24.222	26.3923	26.1019		25.3292					23.8322	24.357	24.4513	24.1069	24.3158	24.5779	23.8592	24.1352	25.3787	26.0888	26.8606	27.2412	25.7419	26.2394
gi|1790042705|gb|QHB88418.1|	gi|1790042705|gb|QHB88418.1|	Escherichia coli BL21-AI	QHB88418.1	72.7	12.295	50S ribosomal protein L7/L12				10	10	25.7329	19	12	3	0	1	1		1						20.6054	20.1425	24.9532	24.9115		23.9567					21.7138		21.2213	18.8809	20.8823	19.6481	19.6162	20.4235	24.2721	24.6262	25.1816	25.7329	24.5916	25.375
gi|1790042906|gb|QHB88619.1|	gi|1790042906|gb|QHB88619.1|	Escherichia coli BL21-AI	QHB88619.1	87.9	15.769	50S ribosomal protein L9				16	16	25.6351	16	8	2	0	1	1								23.5847	22.498	24.9382	24.9465							23.2114	23.2319	23.7091	24.1863	22.758	22.9488	22.4519	21.8332	24.1178	24.4339	25.5662	25.6351	24.1914	25.3974
gi|1790042647|gb|QHB88360.1|	gi|1790042647|gb|QHB88360.1|	Escherichia coli BL21-AI	QHB88360.1	38.8	34.842	6-phosphofructokinase				11	11	24.2712	20	12	3	0	1	1		1						19.9337	19.1382	23.3695	23.0198		21.6901					20.4171	19.2341	20.0435	20.0399	19.6566	19.9046	18.284	18.7077	22.6308	22.7692	23.8069	24.2712	22.3928	22.9274
gi|1790043163|gb|QHB88876.1|	gi|1790043163|gb|QHB88876.1|	Escherichia coli BL21-AI	QHB88876.1	51.5	32.456	6-phosphofructokinase II				11	11	23.0886	15	14	3	2	1	1	1				1	1			16.3808	21.6784	20.6957	16.4365				17.7796	16.3446								16.3808	20.4128	20.8512	22.3611	23.0886	19.2696	21.5642
gi|1790039517|gb|QHB85230.1|	gi|1790039517|gb|QHB85230.1|	Escherichia coli BL21-AI	QHB85230.1	35.3	16.156	6,7-dimethyl-8-ribityllumazine synthase				4	4	24.0059	11	11	3	0	1	1		1								22.7035	22.9121		21.7645													23.1373	21.8992	22.4033	23.3741	22.0901	22.7514
gi|1790039740|gb|QHB85453.1|	gi|1790039740|gb|QHB85453.1|	Escherichia coli BL21-AI	QHB85453.1	41.8	40.654	AAA family ATPase				11	11	21.5342	11	11	3	0	1	1		1								20.8234	20.6695		18.6399													20.493	19.9844	21.2821	21.5342	19.4183	21.4929
gi|1790039875|gb|QHB85588.1|	gi|1790039875|gb|QHB85588.1|	Escherichia coli BL21-AI	QHB85588.1	14	59.857	ABC-F family ATPase				6	6	19.4936	15	14	4	0	1	1	1	1							14.7054	17.8742	17.7845	14.3076	15.7004												14.7054	16.3063	17.1976	19.1568	18.8362	16.4514	18.7018
gi|1790041799|gb|QHB87512.1|	gi|1790041799|gb|QHB87512.1|	Escherichia coli BL21-AI	QHB87512.1	16.7	11.276	accessory factor UbiK family protein				2	2	21.1234	9	8	2	0	1	1								15.9881		20.541	18.279										15.9881					20.2113	21.1234	20.3506	20.4785	18.4108	18.5574
gi|1790041149|gb|QHB86862.1|	gi|1790041149|gb|QHB86862.1|	Escherichia coli BL21-AI	QHB86862.1	41	43.29	acetate kinase				11	11	23.7433	20	12	3	0	1	1		1						20.6765	20.206	23.1451	22.9012		21.5783					20.6696	21.0424	19.6784	21.3156	21.2382	20.03	18.966	20.5898	22.7154	22.525	23.5967	23.7433	22.109	23.2538
gi|1790041995|gb|QHB87708.1|	gi|1790041995|gb|QHB87708.1|	Escherichia coli BL21-AI	QHB87708.1	38.3	49.32	acetyl-CoA carboxylase biotin carboxylase subunit				16	16	22.8755	10	8	2	0	1	1								20.6716	20.5768	21.2774	21.3181								20.6716					20.5768		20.3548	20.1682	21.7112	22.8755	20.8993	21.8606
gi|1790042689|gb|QHB88402.1|	gi|1790042689|gb|QHB88402.1|	Escherichia coli BL21-AI	QHB88402.1	27.5	27.159	acetylglutamate kinase				5	5	17.8526	3	3	1	0	1											17.6019																	17.3007	17.6523	17.8526
gi|1790041203|gb|QHB86916.1|	gi|1790041203|gb|QHB86916.1|	Escherichia coli BL21-AI	QHB86916.1	32.4	22.69	acid-sensing system DNA-binding response regulator EvgA	EvgA			6	6	21.6765	20	12	3	0	1	1		1						18.4992	20.0695	20.4255	20.0911		20.7647					17.8485	19.3562	18.9004	17.8917	20.2466	19.1953	20.7702	20.0662	20.0014	21.0748	20.25	20.3756	20.0135	21.2994
gi|1790040306|gb|QHB86019.1|	gi|1790040306|gb|QHB86019.1|	Escherichia coli BL21-AI	QHB86019.1	39.4	97.646	aconitate hydratase AcnA	AcnA			26	26	21.6656	17	11	3	0	1	1		1						17.2152	17.7837	21.062	20.283		18.1313					18.076	15.6236	17.0416	18.1195	17.2955		18.2718		20.8084	20.4699	21.6656	21.304	19.5582	21.012
gi|1790040156|gb|QHB85869.1|	gi|1790040156|gb|QHB85869.1|	Escherichia coli BL21-AI	QHB85869.1	33.3	8.6394	acyl carrier protein				3	3	23.8379	15	8	2	0	1	1								21.9276	21.3056	23.2574	23.3733							21.4336	21.9587	21.6167	22.7013	21.5296	21.7582	20.6291		22.8272	23.2558	23.5627	23.3838	22.7559	23.8379
gi|1790040597|gb|QHB86310.1|	gi|1790040597|gb|QHB86310.1|	Escherichia coli BL21-AI	QHB86310.1	12.3	36.397	adenosine deaminase				2	2	19.482	3	3	1	0		1											18.0864																			16.8815
gi|1790039579|gb|QHB85292.1|	gi|1790039579|gb|QHB85292.1|	Escherichia coli BL21-AI	QHB85292.1	69.2	23.586	adenylate kinase				14	14	24.4225	20	12	3	0	1	1		1						21.1196	20.8515	23.7396	23.2683		22.6399					21.4098	20.8541	20.9657	21.2486	21.9133	20.8455	20.251	20.3962	23.5174	23.1474	23.8713	24.4225	22.5198	23.6296
gi|1790042880|gb|QHB88593.1|	gi|1790042880|gb|QHB88593.1|	Escherichia coli BL21-AI	QHB88593.1	75.7	47.344	adenylosuccinate synthase				30	30	25.2563	20	12	3	0	1	1		1						21.0211	20.5521	24.3536	23.8702		22.5833					21.0262	20.9678	20.6157	21.4748	21.7407	21.4193	18.8409	20.2075	23.6805	23.6695	24.8079	25.2563	23.2624	24.1628
gi|1790042354|gb|QHB88067.1|	gi|1790042354|gb|QHB88067.1|	Escherichia coli BL21-AI	QHB88067.1	66.8	34.893	ADP-glyceromanno-heptose 6-epimerase				22	22	25.5863	20	12	3	0	1	1		1						20.0831	18.9268	24.0678	24.656		22.5555					20.7943	19.8389	20.039	19.6602	20.0158	18.0941	18.0322	19.5651	23.2575	23.5714	24.6782	24.7642	23.0326	25.0786
gi|1790041957|gb|QHB87670.1|	gi|1790041957|gb|QHB87670.1|	Escherichia coli BL21-AI	QHB87670.1	3	87.982	aerobic respiration two-component sensor histidine kinase ArcB	ArcB			2	2	18.252	2	2	1	0	1											16.6121																14.9722			18.252
gi|1790041675|gb|QHB87388.1|	gi|1790041675|gb|QHB87388.1|	Escherichia coli BL21-AI	QHB87388.1	19.9	33.573	agmatinase				4	4	22.7079	16	8	2	0	1	1								18.9294	19.1632	21.8637	21.1088							20.2125	18.2957	18.5899	18.6196	19.9852	19.5242	18.733	18.4104	21.3695	21.4391	21.9382	22.7079	21.1382	21.1214
gi|1790042765|gb|QHB88478.1|	gi|1790042765|gb|QHB88478.1|	Escherichia coli BL21-AI	QHB88478.1	7	39.152	alanine racemase				2	2	17.9796	3	2	1	0	1										16.8542	16.9812												16.8542				15.9829			17.9796
gi|1790041769|gb|QHB87482.1|	gi|1790041769|gb|QHB87482.1|	Escherichia coli BL21-AI	QHB87482.1	44.7	42.097	alcohol dehydrogenase				13	13	24.5305	18	12	3	0	1	1		1						17.9996	17.9317	23.3752	20.8694		19.8701					16.8621	17.9425		19.1942	18.8364	16.9643		17.9944	21.9434	23.1984	23.8285	24.5305	20.1294	21.7296
gi|1790040412|gb|QHB86125.1|	gi|1790040412|gb|QHB86125.1|	Escherichia coli BL21-AI	QHB86125.1	16.5	52.223	aldehyde dehydrogenase				7	7	20.6827	12	12	3	0	1	1		1								19.3957	20.3147		18.7429													18.9159	18.5502	19.9851	20.1318	20.6827	20.2723
gi|1790039692|gb|QHB85405.1|	gi|1790039692|gb|QHB85405.1|	Escherichia coli BL21-AI	QHB85405.1	62	20.761	alkyl hydroperoxide reductase subunit C				13	13	25.9193	20	12	3	0	1	1		1						20.8985	21.4747	25.2083	24.4376		23.2635					21.2606	19.1994	21.0739	22.0603	22.3376	21.0224	21.0354	21.5032	24.6382	24.7376	25.5381	25.9193	23.7795	24.7637
gi|1790039693|gb|QHB85406.1|	gi|1790039693|gb|QHB85406.1|	Escherichia coli BL21-AI	QHB85406.1	19	56.176	alkyl hydroperoxide reductase subunit F				7	7	20.1047	10	9	3	0	1	1		1							16.3914	19.0053	18.7785		17.3025												16.3914	17.9099	18.4807	19.5258	20.1047		19.5666
gi|1790039757|gb|QHB85470.1|	gi|1790039757|gb|QHB85470.1|	Escherichia coli BL21-AI	QHB85470.1	48.2	58.392	alpha-D-glucose phosphate-specific phosphoglucomutase				21	21	22.4977	20	12	3	0	1	1		1						18.1024	17.5359	21.6915	21.6358		19.3953					18.7239	18.0277	17.7173	17.9405	19.0055	17.5021	15.8077	17.8282	21.4756	20.9102	21.9762	22.4038	19.9586	22.4598
gi|1790041334|gb|QHB87047.1|	gi|1790041334|gb|QHB87047.1|	Escherichia coli BL21-AI	QHB87047.1	1	181.53	alpha2-macroglobulin				2	2	19.0404	6	6	3	0	1	1		1								18.5462	18.7157		17.8559													18.0521			19.0404		18.7579
gi|1790041643|gb|QHB87356.1|	gi|1790041643|gb|QHB87356.1|	Escherichia coli BL21-AI	QHB87356.1	51.6	104.4	aminomethyl-transferring glycine dehydrogenase				33	33	25.1288	20	12	3	0	1	1		1						21.4106	20.3315	24.599	24.5799		22.538					21.1656	21.2374	21.3038	21.9356	21.7084	20.6273	19.3483	19.6422	24.2848	24.096	24.8864	25.1288	24.9594	24.6601
gi|1790040008|gb|QHB85721.1|	gi|1790040008|gb|QHB85721.1|	Escherichia coli BL21-AI	QHB85721.1	33	98.918	aminopeptidase N				21	21	22.184	20	12	3	0	1	1		1						17.9685	17.3425	21.4422	21.0021		19.7847					17.7994	17.5221	17.9446	18.608	18.3469	17.4213	16.2681	17.3339	21.1715	20.4505	22.184	21.9629	20.6853	21.311
gi|1790041338|gb|QHB87051.1|	gi|1790041338|gb|QHB87051.1|	Escherichia coli BL21-AI	QHB87051.1	51.5	46.21	aminopeptidase PepB	PepB			14	14	22.2218	16	8	2	0	1	1								19.3831	18.7765	21.5686	21.6165							18.8939	18.8921	19.6928	20.0538	18.6923	19.4274	18.1696	18.8165	21.3021	20.5294	22.2211	22.2218	20.8545	22.1038
gi|1790041097|gb|QHB86810.1|	gi|1790041097|gb|QHB86810.1|	Escherichia coli BL21-AI	QHB86810.1	18.3	58.958	anaerobic glycerol-3-phosphate dehydrogenase subunit A				8	8	18.3229	9	9	3	0	1	1		1								17.009	16.0234		15.6802													16.2935	15.2597	18.3229	18.1598	14.3015	18.0762
gi|1790041786|gb|QHB87499.1|	gi|1790041786|gb|QHB87499.1|	Escherichia coli BL21-AI	QHB87499.1	40.4	11.532	antibiotic biosynthesis monooxygenase				5	5	26.5542	17	12	3	0	1	1		1						20.8103	20.1796	24.3658	24.2056		26.3513					21.2167	20.6823	20.7621	20.5798		20.1796			23.6531	23.9196	24.8228	25.0677	23.8519	24.1982
gi|1790041921|gb|QHB87634.1|	gi|1790041921|gb|QHB87634.1|	Escherichia coli BL21-AI	QHB87634.1	48.5	49.921	argininosuccinate synthase				18	18	21.8804	16	12	3	0	1	1		1						18.109	16.8096	21.2536	20.9903		18.758								18.109	17.1096		16.6867	16.6325	21.1406	20.4282	21.5653	21.8804	19.6722	21.2727
gi|1790041655|gb|QHB87368.1|	gi|1790041655|gb|QHB87368.1|	Escherichia coli BL21-AI	QHB87368.1	9.8	33.471	ArgP/LysG family DNA-binding transcriptional regulator	ArgP/LysG			2	2	19.0699	7	7	2	0	1	1										18.415	18.302															17.7005	17.9826	18.9071	19.0699		18.8709
gi|1790042766|gb|QHB88479.1|	gi|1790042766|gb|QHB88479.1|	Escherichia coli BL21-AI	QHB88479.1	30.7	43.521	aromatic amino acid transaminase				10	10	21.0836	10	10	3	0	1	1		1								19.7334	19.3421		17.4651													19.6165	17.3671	20.8663	21.0836	17.9691	20.0434
gi|1790041284|gb|QHB86997.1|	gi|1790041284|gb|QHB86997.1|	Escherichia coli BL21-AI	QHB86997.1	8.5	13.6	ArsC family reductase	ArsC			1	1	20.1341	5	5	2	0	1	1										19.6485	18.7857															18.8116		19.9998	20.1341		18.8267
gi|1790042385|gb|QHB88098.1|	gi|1790042385|gb|QHB88098.1|	Escherichia coli BL21-AI	QHB88098.1	1.6	62.272	AsmA family protein	AsmA			1	1	18.2536	6	6	2	0	1	1										17.8343	16.5349															16.8728	18.1787	18.2536	18.0319		16.5858
gi|1790039743|gb|QHB85456.1|	gi|1790039743|gb|QHB85456.1|	Escherichia coli BL21-AI	QHB85456.1	11.7	62.674	asparagine synthase B				4	4	18.1497	4	2	1	0	1									15.173	14.5582	17.9246											15.173		14.5582					17.6994	18.1497
gi|1790039300|gb|QHB85013.1|	gi|1790039300|gb|QHB85013.1|	Escherichia coli BL21-AI	QHB85013.1	21.4	13.834	aspartate 1-decarboxylase				2	2	22.2198	8	3	1	0	1									21.0028	21.2193	21.8418								21.1814			20.8241	21.0141	22.0099	20.6338		22.0505		22.2198	21.2552
gi|1790042671|gb|QHB88384.1|	gi|1790042671|gb|QHB88384.1|	Escherichia coli BL21-AI	QHB88384.1	3.8	88.945	aspartate kinase				3	3	17.6011	4	4	1	0		1											16.4325																			15.1528	17.6011
gi|1790042164|gb|QHB87877.1|	gi|1790042164|gb|QHB87877.1|	Escherichia coli BL21-AI	QHB87877.1	22.9	40.033	aspartate-semialdehyde dehydrogenase				6	6	22.0573	16	12	3	0	1	1		1						17.7732	20.0954	20.5616	21.1636		19.4662					17.7732				20.9379		17.6682	21.68	19.9908	20.5594	19.8244	21.8718	20.1138	21.0413
gi|1790042010|gb|QHB87723.1|	gi|1790042010|gb|QHB87723.1|	Escherichia coli BL21-AI	QHB87723.1	4.4	28.574	ATP-binding cassette domain-containing protein				1	1	23.6932	8	2	1	0				1						21.8546	20.3646				22.8879					19.1732	23.1643	22.9053	22.1759	18.2861	22.4432
gi|1790042507|gb|QHB88220.1|	gi|1790042507|gb|QHB88220.1|	Escherichia coli BL21-AI	QHB88220.1	8.3	47.125	ATP-dependent RNA helicase RhlB	RhlB			3	3	18.6746	7	7	2	0	1	1										17.7767	17.9805															16.6359	17.2238	18.5723	18.6746	16.9131	18.386
gi|1790041391|gb|QHB87104.1|	gi|1790041391|gb|QHB87104.1|	Escherichia coli BL21-AI	QHB87104.1	37.2	49.898	ATP-dependent RNA helicase SrmB	SrmB			13	13	21.6282	16	16	2	3	1	1				1	1	1				18.5656	19.7643				14.3804	15.3859	14.6846									18.1567	17.5204	18.7228	19.8626	17.5217	21.6282
gi|1790041926|gb|QHB87639.1|	gi|1790041926|gb|QHB87639.1|	Escherichia coli BL21-AI	QHB87639.1	19.3	70.707	ATP-dependent zinc metalloprotease FtsH	FtsH			10	10	21.2761	13	12	3	0	1	1		1						15.0183		20.258	19.2471		18.3075						15.0183							18.5813	20.5657	20.6088	21.2761	19.1172	19.9603
gi|1790043014|gb|QHB88727.1|	gi|1790043014|gb|QHB88727.1|	Escherichia coli BL21-AI	QHB88727.1	6.7	41.083	beta-aspartyl-peptidase				3	3	23.2196	19	12	3	0	1	1		1						20.1152	20.1274	22.8029	21.7757		21.3088					19.9872	20.1035		20.255	20.6984	20.2285	19.4366	20.1463	22.0499	22.7981	23.2196	23.1438	21.423	22.372
gi|1790041176|gb|QHB86889.1|	gi|1790041176|gb|QHB86889.1|	Escherichia coli BL21-AI	QHB86889.1	64.5	42.613	beta-ketoacyl-ACP synthase I				23	23	26.9285	23	15	3	1	1	1		1			1			21.1128	20.7043	25.453	25.9982		24.2357			22.6861		21.6413	20.4366	20.6216	21.7516	21.1067	21.4128	20.3929	19.9048	24.8482	24.8885	26.2045	25.8711	24.2595	26.9285
gi|1790040157|gb|QHB85870.1|	gi|1790040157|gb|QHB85870.1|	Escherichia coli BL21-AI	QHB85870.1	50.8	43.045	beta-ketoacyl-ACP synthase II				13	13	26.1572	20	12	3	0	1	1		1						22.2125	21.8631	25.3916	25.0766		23.7403					23.3789	20.8868	22.3398	22.2443	21.9652	22.0827	21.2497	22.1549	24.6449	24.838	26.1572	25.9263	23.9781	25.528
gi|1790040153|gb|QHB85866.1|	gi|1790040153|gb|QHB85866.1|	Escherichia coli BL21-AI	QHB85866.1	18.9	33.546	beta-ketoacyl-ACP synthase III				4	4	22.8378	16	16	3	2	1	1		1			1	1				21.5247	21.6563		19.4849			16.1933	14.987									20.522	20.6403	22.4415	22.4948	20.2847	22.8378
gi|1790040272|gb|QHB85985.1|	gi|1790040272|gb|QHB85985.1|	Escherichia coli BL21-AI	QHB85985.1	49.5	96.126	bifunctional acetaldehyde-CoA/alcohol dehydrogenase				39	39	24.8805	20	12	3	0	1	1		1						18.59	18.1551	23.9509	23.6554		22.3895					19.8756	17.5835	18.4506	18.45	15.6292	19.7003	18.6944	18.5967	23.035	23.2051	24.6829	24.8805	22.9719	24.3063
gi|1790042091|gb|QHB87804.1|	gi|1790042091|gb|QHB87804.1|	Escherichia coli BL21-AI	QHB87804.1	32	43.766	bifunctional acetylornithine/succinyldiaminopimelate transaminase				8	8	21.1986	11	7	2	0	1	1								17.6091	17.2983	19.485	19.3005							17.3386	17.8796				17.7346	16.8621		19.1966	17.0841	20.4607	21.1986	19.3235
gi|1790039287|gb|QHB85000.1|	gi|1790039287|gb|QHB85000.1|	Escherichia coli BL21-AI	QHB85000.1	62	93.497	bifunctional aconitate hydratase 2/2-methylisocitrate dehydratase				51	51	25.0721	20	12	3	0	1	1		1						21.7042	20.9256	24.3128	24.2138		22.5951					21.556	21.5079	21.7215	22.0313	21.6235	21.3445	20.3737	20.3608	23.8942	23.5797	24.7054	25.0721	24.1809	24.2624
gi|1790041408|gb|QHB87121.1|	gi|1790041408|gb|QHB87121.1|	Escherichia coli BL21-AI	QHB87121.1	10.6	43.111	bifunctional chorismate mutase/prephenate dehydratase				3	3	19.4272	6	6	2	0	1	1										18.9673	17.9354															18.3269	19.1479	19.4272			18.7864
gi|1790039516|gb|QHB85229.1|	gi|1790039516|gb|QHB85229.1|	Escherichia coli BL21-AI	QHB85229.1	9.5	40.266	bifunctional diaminohydroxyphosphoribosylaminopyrimidine deaminase/5-amino-6-(5-phosphoribosylamino)uracil reductase RibD	RibD			3	3	19.9365	14	10	3	0	1	1		1						16.1359	16.7699	19.1207	18.1725		17.7074					16.1359				17.2089		16.6537	16.4471		17.8531	19.5724	19.9365	17.4546	19.0142
gi|1790040076|gb|QHB85789.1|	gi|1790040076|gb|QHB85789.1|	Escherichia coli BL21-AI	QHB85789.1	16.9	45.693	bifunctional glucose-1-phosphatase/inositol phosphatase				6	6	21.0685	10	4	1	0	1									18.9236	18.8996	20.5918								17.7977	18.4735	18.3547	21.0685	19.6212	18.1779			20.4879	20.7919	20.051	21.0366
gi|1790041749|gb|QHB87462.1|	gi|1790041749|gb|QHB87462.1|	Escherichia coli BL21-AI	QHB87462.1	6.9	70.589	bifunctional glutathionylspermidine amidase/synthase				3	3	19.9794	13	13	4	0	1	1	1	1								18.9893	18.5791	15.0742	17.3648													18.2899	18.1683	19.5197	19.9794	16.7589	19.0123
gi|1790043141|gb|QHB88854.1|	gi|1790043141|gb|QHB88854.1|	Escherichia coli BL21-AI	QHB88854.1	20.1	49.391	bifunctional indole-3-glycerol-phosphate synthase TrpC/phosphoribosylanthranilate isomerase TrpF	TrpF			7	7	20.6744	6	6	2	0	1	1										18.8719	18.8115															17.3036		18.6376	20.6744		19.6075
gi|1790042676|gb|QHB88389.1|	gi|1790042676|gb|QHB88389.1|	Escherichia coli BL21-AI	QHB88389.1	7.9	38.712	bifunctional L-1,2-propanediol dehydrogenase/glycerol dehydrogenase				3	3	20.5297	19	12	3	0	1	1		1						17.7657	17.6782	20.09	20.3642		19.118					17.6095	17.7639	17.9236		18.8014	17.6778	17.0025	17.231	19.7013	19.7912	20.4391	20.4286	20.1856	20.2918
gi|1790041168|gb|QHB86881.1|	gi|1790041168|gb|QHB86881.1|	Escherichia coli BL21-AI	QHB86881.1	16.1	45.405	bifunctional tetrahydrofolate synthase/dihydrofolate synthase				3	3	18.9484	2	2	1	0	1											17.8248																16.7012			18.9484
gi|1790041676|gb|QHB87389.1|	gi|1790041676|gb|QHB87389.1|	Escherichia coli BL21-AI	QHB87389.1	24.9	73.898	biosynthetic arginine decarboxylase				15	15	21.9153	13	12	3	0	1	1		1							15.3461	20.8551	20.9289		18.3611									15.3461				20.5754	19.1253	21.8044	21.9153	20.5541	21.0107
gi|1790042500|gb|QHB88213.1|	gi|1790042500|gb|QHB88213.1|	Escherichia coli BL21-AI	QHB88213.1	18.4	34.079	branched-chain-amino-acid transaminase				4	4	21.8051	16	10	3	0	1	1		1						18.5759	18.4442	20.7792	21.0601		19.4045					18.419	18.5419		18.7667	18.7492	18.1514	18.4319		20.7052	20.1726	20.903	21.3359	20.211	21.8051
gi|1790042089|gb|QHB87802.1|	gi|1790042089|gb|QHB87802.1|	Escherichia coli BL21-AI	QHB87802.1	66.7	23.64	cAMP-activated global transcriptional regulator CRP				12	12	25.5971	19	12	3	0	1	1		1						20.2261	18.5987	24.7442	24.1841		22.9178					19.7264	20.2384		20.7136	18.8827	19.3733	16.3468	19.7918	23.619	24.6641	25.0966	25.5971	23.6888	24.872
gi|1790039213|gb|QHB84926.1|	gi|1790039213|gb|QHB84926.1|	Escherichia coli BL21-AI	QHB84926.1	43.2	117.87	carbamoyl-phosphate synthase large subunit				39	39	21.5652	16	12	3	0	1	1		1						15.7855	14.7101	20.0959	20.8012		18.3637					15.4592		16.7082	15.1892	14.7101				19.5356	18.4808	20.8019	21.5652	20.8655	21.2966
gi|1790039212|gb|QHB84925.1|	gi|1790039212|gb|QHB84925.1|	Escherichia coli BL21-AI	QHB84925.1	25.7	41.431	carbamoyl-phosphate synthase small subunit				7	7	21.4957	13	13	2	2	1	1					1	1				20.7874	20.4695					15.8346	15.7913									20.1463	20.4128	21.0949	21.4957	20.1436	20.8486
gi|1790041462|gb|QHB87175.1|	gi|1790041462|gb|QHB87175.1|	Escherichia coli BL21-AI	QHB87175.1	63.9	6.8558	carbon storage regulator CsrA	CsrA			3	3	24.3329	15	8	2	0	1	1								22.2036	21.9727	23.2657	22.8615							22.5883		21.3855	22.6369	23.2283	21.433	21.0015	22.228	22.4823	24.3329	22.9338	23.3137	22.1193	22.9217
gi|1790039295|gb|QHB85008.1|	gi|1790039295|gb|QHB85008.1|	Escherichia coli BL21-AI	QHB85008.1	26.4	25.096	carbonate dehydratase				5	5	23.0145	18	12	3	0	1	1		1						18.658	18.0326	22.0962	21.4702		20.1322					19.3456		18.235	18.3934		17.0999	18.7981	18.1998	21.5111	21.9412	21.9179	23.0145	21.6476	21.4973
gi|1790040793|gb|QHB86506.1|	gi|1790040793|gb|QHB86506.1|	Escherichia coli BL21-AI	QHB86506.1	3.2	76.56	carboxy terminal-processing peptidase				2	2	17.8935	7	7	2	0	1	1										16.7033	15.2427															15.8718	16.687	16.3611	17.8935		15.6116
gi|1790040228|gb|QHB85941.1|	gi|1790040228|gb|QHB85941.1|	Escherichia coli BL21-AI	QHB85941.1	12.9	38.844	catabolic alanine racemase DadX	DadX			4	4	19.172	3	3	1	0	1											18.4659																	17.1601	19.172	19.0657
gi|1790039252|gb|QHB84965.1|	gi|1790039252|gb|QHB84965.1|	Escherichia coli BL21-AI	QHB84965.1	15	37.999	catabolite repressor/activator				4	4	20.6461	4	3	1	0	1									19.0467		20.1812										19.0467						20.6461		19.8104	20.0872
gi|1790042119|gb|QHB87832.1|	gi|1790042119|gb|QHB87832.1|	Escherichia coli BL21-AI	QHB87832.1	2.6	46.059	cell division protein DamX	DamX			1	1	17.9841	7	7	2	0	1	1										17.0829	16.5958															15.3356	17.3204	17.6916	17.9841	16.7264	16.9047
gi|1790042664|gb|QHB88377.1|	gi|1790042664|gb|QHB88377.1|	Escherichia coli BL21-AI	QHB88377.1	9.4	35.793	cell division protein FtsN	FtsN			2	2	16.6505	4	4	1	0	1											15.7617																14.0965	16.3315	15.9683	16.6505
gi|1790042192|gb|QHB87905.1|	gi|1790042192|gb|QHB87905.1|	Escherichia coli BL21-AI	QHB87905.1	9.7	38.543	cell division protein FtsX	FtsX			4	4	19.5682	3	3	1	0	1											18.9733																18.2596	19.092		19.5682
gi|1790039267|gb|QHB84980.1|	gi|1790039267|gb|QHB84980.1|	Escherichia coli BL21-AI	QHB84980.1	63.4	40.323	cell division protein FtsZ	FtsZ			19	19	24.1805	20	12	3	0	1	1		1						21.4316	21.4011	23.3846	23.1092		22.0253					21.7287	20.9481	21.8499	21.1995	21.8216	20.3968	21.6296	21.7563	22.1376	23.1748	24.0454	24.1805	21.6777	23.9054
gi|1790041650|gb|QHB87363.1|	gi|1790041650|gb|QHB87363.1|	Escherichia coli BL21-AI	QHB87363.1	45	12.594	cell division protein ZapA	ZapA			4	4	20.929	2	2	1	0	1											20.1016																19.2742			20.929
tr|U2Q8X2|U2Q8X2_EUBRA	tr|U2Q8X2|U2Q8X2_EUBRA	Eubacterium ramulus ATCC 29099	U2Q8X2_EUBRA	76.3	32.461	Chalcone_N domain-containing protein				26	26	32.0784	20	12	3	0	1	1		1						28.8274	28.6949	31.3789	31.0174		29.8831					28.6972	28.5818	28.9414	29.0891	28.8933	28.7019	28.433	28.7515	30.6632	30.7867	32.0784	31.9873	30.6196	31.0174
gi|1790042849|gb|QHB88562.1|	gi|1790042849|gb|QHB88562.1|	Escherichia coli BL21-AI	QHB88562.1	80.5	57.328	chaperonin GroEL				55	55	27.9322	20	12	3	0	1	1		1						24.7607	24.4387	27.2158	27.3654		26.0843					24.8469	24.6099	24.6487	24.9372	24.7428	24.2939	24.2438	24.4744	27.0357	26.5154	27.5274	27.7848	26.5863	27.8182
gi|1790039786|gb|QHB85499.1|	gi|1790039786|gb|QHB85499.1|	Escherichia coli BL21-AI	QHB85499.1	37.9	48.014	citrate (Si)-synthase				17	17	25.6876	20	12	3	0	1	1		1						22.0279	21.7281	25.0432	24.7753		24.1039					22.5096	21.9911	21.2259	22.385	22.3432	21.3723	21.5979	21.5991	24.6433	24.4649	25.377	25.6876	24.4605	24.9916
gi|1790042934|gb|QHB88647.1|	gi|1790042934|gb|QHB88647.1|	Escherichia coli BL21-AI	QHB88647.1	34.9	36.833	class 1 fructose-bisphosphatase				11	11	22.7194	23	19	4	2	1	1	1	1			1	1		15.3142	17.6075	21.8654	21.6742	16.6997	19.4604			17.0512	16.7505			15.6085	15.0198	18.0527	17.1623			20.9888	21.4687	22.6159	22.3881	20.5764	22.7194
gi|1790040967|gb|QHB86680.1|	gi|1790040967|gb|QHB86680.1|	Escherichia coli BL21-AI	QHB86680.1	19.1	38.109	class I fructose-bisphosphate aldolase				5	5	21.5706	12	8	2	0	1	1								17.6076	17.1066	19.7392	19.9541							16.8972			18.318	17.4447	16.7686			19.354	19.0616	20.0372	20.5038	19.2192	21.5706
gi|1790041664|gb|QHB87377.1|	gi|1790041664|gb|QHB87377.1|	Escherichia coli BL21-AI	QHB87377.1	48.2	39.147	class II fructose-bisphosphate aldolase				19	19	27.0846	20	12	3	0	1	1		1						24.1666	23.7529	26.3906	25.6977		24.8319					24.2036	23.5264	24.3556	24.581	24.3992	23.4357	23.5042	23.6725	25.8382	26.0007	26.6391	27.0846	25.4164	25.8296
gi|1790040585|gb|QHB86298.1|	gi|1790040585|gb|QHB86298.1|	Escherichia coli BL21-AI	QHB86298.1	5.6	50.519	class II fumarate hydratase				3	3	19.0553	2	2	1	0	1											18.7309																19.0553			18.4066
gi|1790042848|gb|QHB88561.1|	gi|1790042848|gb|QHB88561.1|	Escherichia coli BL21-AI	QHB88561.1	64.9	10.387	co-chaperone GroES				5	5	23.9591	16	8	2	0	1	1								22.057	21.6453	23.418	23.0406							21.9468	21.5332	21.0607	23.6875	22.0289	21.8508	20.951	21.7506	22.9549	23.9591	23.3141	23.4438	22.7794	23.174
gi|1790041540|gb|QHB87253.1|	gi|1790041540|gb|QHB87253.1|	Escherichia coli BL21-AI	QHB87253.1	59.3	60.373	CTP synthase (glutamine hydrolyzing)				32	32	23.5593	24	18	3	2	1	1		1		1	1			17.3522	17.0969	22.6661	22.8015		20.3115		17.3637	19.2131			16.2192	17.4917	18.3456		17.6802	15.6739	17.9367	22.6522	21.5347	23.3244	23.1529	21.5314	23.2032
gi|1790040187|gb|QHB85900.1|	gi|1790040187|gb|QHB85900.1|	Escherichia coli BL21-AI	QHB85900.1	3.5	42.564	cupin domain-containing protein				1	1	19.3928	2	2	1	0	1											19.1681																	18.9434		19.3928
gi|1790041571|gb|QHB87284.1|	gi|1790041571|gb|QHB87284.1|	Escherichia coli BL21-AI	QHB87284.1	24.5	15.94	cysteine desulfurase sulfur acceptor subunit CsdE				2	2	19.4903	6	6	3	0		1	1	1									19.1513	18.866	18.6738																	18.8123	19.4903
gi|1790041238|gb|QHB86951.1|	gi|1790041238|gb|QHB86951.1|	Escherichia coli BL21-AI	QHB86951.1	75.9	34.489	cysteine synthase A				21	21	25.1704	12	4	1	0	1									23.9086	23.5147	24.4977								24.4461	23.8989	23.5581	23.7314	24.0049	24.0116	22.9785	23.0639	24.2748	24.0036	24.542	25.1704
gi|1790041809|gb|QHB87522.1|	gi|1790041809|gb|QHB87522.1|	Escherichia coli BL21-AI	QHB87522.1	11.8	48.388	CYTH domain-containing protein				5	5	20.1132	10	10	3	0	1	1		1								19.4169	18.6554		17.4668													18.84	19.2638	19.4505	20.1132	17.7208	19.6642
gi|1790041330|gb|QHB87043.1|	gi|1790041330|gb|QHB87043.1|	Escherichia coli BL21-AI	QHB87043.1	9.2	36.172	cytoskeleton protein RodZ				2	2	21.3717	8	8	2	0	1	1										20.66	19.6378															19.848	20.6751	20.7452	21.3717	19.6681	19.6478
gi|1790039397|gb|QHB85110.1|	gi|1790039397|gb|QHB85110.1|	Escherichia coli BL21-AI	QHB85110.1	35.7	52.902	cytosol nonspecific dipeptidase				15	15	24.8707	20	12	3	0	1	1		1						21.9789	22.1447	24.2792	23.8699		22.9417					21.8951	22.3565	21.5393	22.1246	22.5234	22.055	21.9619	22.0383	23.6502	23.969	24.6268	24.8707	23.6048	23.6243
gi|1790041652|gb|QHB87365.1|	gi|1790041652|gb|QHB87365.1|	Escherichia coli BL21-AI	QHB87365.1	36.8	44.175	D-3-phosphoglycerate dehydrogenase				11	11	22.1979	10	8	2	0	1	1								14.8034	14.8707	19.6955	20.0973									14.8034					14.8707	18.8839	18.592	20.4523	20.8536	17.0651	21.2989
gi|1790039716|gb|QHB85429.1|	gi|1790039716|gb|QHB85429.1|	Escherichia coli BL21-AI	QHB85429.1	31.3	44.443	D-alanyl-D-alanine carboxypeptidase DacA	DacA			9	9	21.5918	11	10	3	0	1	1		1							16.6559	20.1699	20.2842		17.7541											16.6559		19.9235	19.6627	19.5016	21.5918		20.5409
gi|1790040742|gb|QHB86455.1|	gi|1790040742|gb|QHB86455.1|	Escherichia coli BL21-AI	QHB86455.1	39.8	32.727	D-hexose-6-phosphate mutarotase				8	8	23.5842	20	12	3	0	1	1		1						19.9912	19.1282	22.9452	22.4465		21.3611					19.8102	20.7095	18.8329	20.6122	19.4225	18.3322	18.5378	20.2201	22.8774	22.1955	23.1238	23.5842	22.4044	22.5518
gi|1790040398|gb|QHB86111.1|	gi|1790040398|gb|QHB86111.1|	Escherichia coli BL21-AI	QHB86111.1	24.9	36.52	D-lactate dehydrogenase				8	8	22.3111	19	12	3	0	1	1		1						18.641	18.3128	21.5466	21.3826		19.5119					18.9614	17.572		19.3896	19.1014	19.2454	17.2406	17.6637	21.1979	20.9978	21.6794	22.3111	20.4264	22.0566
gi|1790039383|gb|QHB85096.1|	gi|1790039383|gb|QHB85096.1|	Escherichia coli BL21-AI	QHB85096.1	42.7	20.815	D-sedoheptulose 7-phosphate isomerase				6	6	23.2727	16	8	2	0	1	1								21.0888	19.0829	22.8935	22.3942							21.0107	20.0735	21.4105	21.8606	20.3375	19.8526	16.6357	19.5057	22.2803	22.9247	23.0964	23.2727	22.7465	22.2515
gi|1790040943|gb|QHB86656.1|	gi|1790040943|gb|QHB86656.1|	Escherichia coli BL21-AI	QHB86656.1	26.4	21.251	dCTP deaminase				4	4	21.053	5	3	1	0		1								19.1206			20.5531							20.8578			17.3835										20.0385
gi|1790040313|gb|QHB86026.1|	gi|1790040313|gb|QHB86026.1|	Escherichia coli BL21-AI	QHB86026.1	10.8	27.588	DeoR family transcriptional regulator				2	2	17.0175	2	2	1	0		1											16.8072																			16.5969	17.0175
gi|1790043068|gb|QHB88781.1|	gi|1790043068|gb|QHB88781.1|	Escherichia coli BL21-AI	QHB88781.1	47.5	27.748	deoxyribose-phosphate aldolase				11	11	22.8159	20	12	3	0	1	1		1						17.8916	17.5978	21.8444	20.5398		19.1709					18.0995	17.9978	17.4007	18.0682	18.2011	17.3659	17.1346	17.6896	21.4949	21.2461	21.8208	22.8159	19.8833	21.0146
gi|1790040874|gb|QHB86587.1|	gi|1790040874|gb|QHB86587.1|	Escherichia coli BL21-AI	QHB86587.1	6	30.218	DgsA anti-repressor MtfA	MtfA			1	1	19.4506	2	2	1	0	1											18.8503																18.2499	19.4506
gi|1790042755|gb|QHB88468.1|	gi|1790042755|gb|QHB88468.1|	Escherichia coli BL21-AI	QHB88468.1	7.4	13.245	diacylglycerol kinase				1	1	22.5	12	12	3	0	1	1		1								21.9117	20.4994		19.5047													20.6397	22.5	22.0317	22.4753	19.9225	21.1578
gi|1790039285|gb|QHB84998.1|	gi|1790039285|gb|QHB84998.1|	Escherichia coli BL21-AI	QHB84998.1	70.9	50.688	dihydrolipoyl dehydrogenase				43	43	27.7178	16	8	2	0	1	1								25.3743	25.4021	27.0953	26.6586							25.46	25.3017	25.0655	25.6703	25.7014	25.513	25.2248	25.1692	26.6262	27.1264	26.9107	27.7178	26.0951	27.0335
gi|1790041925|gb|QHB87638.1|	gi|1790041925|gb|QHB87638.1|	Escherichia coli BL21-AI	QHB87638.1	3.9	30.615	dihydropteroate synthase				1	1	18.161	2	2	1	0		1											17.9111																				17.6612
gi|1790042501|gb|QHB88214.1|	gi|1790042501|gb|QHB88214.1|	Escherichia coli BL21-AI	QHB88214.1	13.3	65.559	dihydroxy-acid dehydratase				7	7	19.0907	11	11	3	0	1	1		1								17.8292	17.121		16.2869													17.7341	17.13	17.362	19.0907	16.318	16.2875
gi|1790040238|gb|QHB85951.1|	gi|1790040238|gb|QHB85951.1|	Escherichia coli BL21-AI	QHB85951.1	17.7	38.215	dihydroxyacetone kinase subunit DhaK				5	5	20.1178	9	7	2	0	1	1								15.0293		18.9372	17.9789								14.0745		15.9842					19.0883	17.261	19.2814	20.1178	17.3769	18.5264
gi|1790042225|gb|QHB87938.1|	gi|1790042225|gb|QHB87938.1|	Escherichia coli BL21-AI	QHB87938.1	1.6	53.547	dipeptide/tripeptide permease DtpB				1	1	22.1352	13	11	3	0	1	1		1							18.0574	20.6802	20.063		18.8257										19.0462	17.0685		19.231	22.1352	20.3483	21.0061	19.5097	20.9635
gi|1790040890|gb|QHB86603.1|	gi|1790040890|gb|QHB86603.1|	Escherichia coli BL21-AI	QHB86603.1	28.7	18.061	DNA gyrase inhibitor SbmC	SbmC			4	4	26.7671	16	16	4	0	1	1	1	1								24.2182	24.4195	23.1054	26.1102													23.8494	23.9766	24.209	24.8377	24.3022	24.6763
gi|1790042596|gb|QHB88309.1|	gi|1790042596|gb|QHB88309.1|	Escherichia coli BL21-AI	QHB88309.1	24.4	103.12	DNA polymerase I				18	18	20.8379	18	12	3	0	1	1		1						14.5111	16.8951	19.6595	20.1126		18.2264					14.9589	14.6646		13.9098	15.5432	16.947		18.1951	19.1704	18.7678	19.9297	20.7701	19.3999	20.8379
gi|1790042440|gb|QHB88153.1|	gi|1790042440|gb|QHB88153.1|	Escherichia coli BL21-AI	QHB88153.1	21	40.586	DNA polymerase III subunit beta				6	6	19.6078	8	8	3	0	1	1		1								18.8053	19.3329		18.2908													18.7874		18.1123	19.5162		19.6078
gi|1790039867|gb|QHB85580.1|	gi|1790039867|gb|QHB85580.1|	Escherichia coli BL21-AI	QHB85580.1	75.4	18.695	DNA starvation/stationary phase protection protein Dps				16	16	25.9528	20	12	3	0	1	1		1						21.1804	21.2384	25.163	25.0412		24.1753					20.8013	20.9426	20.5824	22.3951	21.4545	21.1212	20.8981	21.4799	24.5627	24.6559	25.4806	25.9528	24.812	25.2066
gi|1790041088|gb|QHB86801.1|	gi|1790041088|gb|QHB86801.1|	Escherichia coli BL21-AI	QHB86801.1	10.2	96.99	DNA topoisomerase (ATP-hydrolyzing) subunit A				9	9	20.4568	17	12	3	0	1	1		1						15.8686	16.0215	19.4838	19.1554		17.7512					15.459		15.1768	16.9698			16.8829	15.1602	18.9255	18.6085	19.9444	20.4568	18.649	19.5843
[truncated: 343 more rows]
[truncated: 26 more columns]

## Sheet: XNABP1_IXNABP Comp Passed
Protein IDs	Majority protein IDs	gi	gb	Fasta headers	Organism	ABP Group (ct.)	Unique peptides	iBAQ peptides	iBAQ Max	XN-ABP-1 AVG	IXN-ABP-1 AVG	NP-UVCTR-1	NP-UVCTR-2	NP-UVCTR-3	NP-UVCTR-4	NP-NoUVCTR-5	NP-NoUVCTR-6	NP-NoUVCTR-7	NP-NoUVCTR-8	XN-ABP-1_rep1	XN-ABP-1_rep2	XN-ABP-1_rep3	XN-ABP-1_rep4	XN-ABP-1-20XINH-rep1	XN-ABP-1-20XINH-rep2	XN-ABP-1-20XINH-rep3	XN-ABP-1-20XINH-rep4	IXN-ABP-1-rep1	IXN-ABP-1-rep2	IXN-ABP-1-rep3	IXN-ABP-1-rep4	IXN-ABP-1-20XINH-rep1	IXN-ABP-1-20XINH-rep2	IXN-ABP-1-20XINH-rep3	IXN-ABP-1-20XINH-rep4
[truncated: 97 more rows]
